# Supplementary material for: Algorithm-Driven, Phenotype-Directed Bioactive Molecular Discovery
Source: Research Square preprint supplement (doi:10.21203/rs.3.rs-8058819/v1), 2025-11-29

## Supplementary Information

### Algorithm-Driven, Phenotype-Directed Bioactive Molecular Discovery

Amalia-Sofia Piticari, Samuel Griggs, Laura Crawford, Joss Whittle, Brian Suarez-Mantilla,  
Sonja Sievers, Steve Marsden, Mark Basham and Adam Nelson

#### Table of Contents

|                                                                  |           |
|------------------------------------------------------------------|-----------|
| <b>General Considerations.....</b>                               | <b>1</b>  |
| <b>A. Experimental Workflow Procedures.....</b>                  | <b>2</b>  |
| 1. Automated Reaction Set-up.....                                | 2         |
| 2. Quantification Protocol.....                                  | 7         |
| 3. Purification Method Parameters.....                           | 9         |
| 4. Weighing, Drying and Plating of Isolated Compounds.....       | 10        |
| 5. Methods for Cell Painting Assay.....                          | 11        |
| 6. KNIME Workflow for Filtering Substrates/Co-substrates.....    | 14        |
| 7. Methods for Cell Biology.....                                 | 22        |
| <b>B. First Discovery Round – Summary and Outcomes.....</b>      | <b>28</b> |
| <b>C. Subsequent Discovery Round – Summary and Outcomes.....</b> | <b>31</b> |
| <b>D. Synthetic Procedures.....</b>                              | <b>35</b> |
| <b>References.....</b>                                           | <b>48</b> |
| <b>NMR Spectra.....</b>                                          | <b>49</b> |

## General Considerations

Commercially available starting materials were obtained from SigmaAldrich (Merck), Fluorochem or Fisher. Solvents was purchased from SigmaAldrich (Merck) and was used as supplied.

All array reactions were set up using a Zinsser Analytic Lissy platform, equipped with the Zinsser WinLissy software version 8. The reactions were set up in Zinsser 96-well blocks equipped with 1 mL glass vials.

Plate reformatting and aliquoting for analytical and purification purposes were performed using a Hamilton Microlab STAR automated liquid handling system, operated via the Venus control software. The reaction mixtures were transferred into Greiner clear polypropylene 96-deep well plates (1.1 mL/well) and corresponding aliquots into Greiner clear polypropylene 96-well microtiter plates (392  $\mu$ L/well).

Analytical LC-MS was performed using a system comprising a Waters Acquity H-CLASS UPLC with a PDA detector, evaporative light-scattering (ELS) detector, and SQD2 with electrospray ionisation. The system ran in positive mode using a Waters Acquity UPLC BEH C18 (50 mm  $\times$  2.1 mm  $\times$  1.7  $\mu$ m) column and gradient elution with a binary solvent system comprising of MeCN + 0.1% formic acid and H<sub>2</sub>O + 0.1% formic acid. All solvents used in analytical studies were of LC-MS grade.

Mass directed purification was performed using a Waters HPLC system comprising of a PDA detector, ELS detector and SQD2 with electrospray ionisation. The system ran in positive mode using a Waters XBridge Prep C18 (100 mm  $\times$  19 mm  $\times$  5  $\mu$ m) column and gradient elution with a binary solvent system comprising of MeCN + 0.1% formic acid and H<sub>2</sub>O + 0.1% formic acid. All solvents used in purification were of HPLC grade.

All scale-up reactions were carried out under an inert atmosphere (argon) using standard techniques, unless otherwise specified. Analytical thin-layer chromatography (TLC) was performed on precoated, aluminium-backed silica gel plates. Visualisation of the developed chromatogram was performed by UV absorbance (254 nm) and/or stained with a permanganate solution in ethanol. Chromatographic purification was performed either manually using 230–400 mesh silica according to standard techniques or using an automated flash chromatography Teledyne Isco® using the supplier provided cartridges.

Nuclear magnetic resonance spectra were recorded on either a 400 MHz Bruker or a 600 MHz Bruker spectrometer, with the frequency noted in each spectral assignment. Data was collected at 298 K unless otherwise stated. Chemical shifts for <sup>1</sup>H NMR spectra were recorded in parts per million from tetramethylsilane with the residual protonated solvent resonance as the internal standard (CDCl<sub>3</sub>:  $\delta$  7.26 ppm, CD<sub>3</sub>OD:  $\delta$  3.31 ppm). Coupling constants (*J*) are reported in Hertz (Hz) and splitting patterns are reported in an abbreviated manner: s (singlet), d (doublet), t (triplet), q (quartet), m (multiplet), br (broad). <sup>13</sup>C NMR spectra were recorded with complete proton decoupling. Chemical shifts were reported in parts per million from tetramethylsilane with the solvent resonance as the internal standard (<sup>13</sup>CDCl<sub>3</sub>:  $\delta$  77.0 ppm, <sup>13</sup>CD<sub>3</sub>OD:  $\delta$  49.0 ppm). Assignments of <sup>1</sup>H and <sup>13</sup>C spectra, were based upon the analysis of  $\delta$  and *J* values, as well as DEPT, COSY, HSQC, HMBC and NOESY experiments where appropriate. <sup>19</sup>F NMR spectra are indirectly referenced to CFCl<sub>3</sub>, automatically via direct measurement of the absolute frequency of the deuterium lock signal by the spectrometer hardware.

A Bruker Daltonics micrOTOF spectrometer with electrospray (ES) ionisation source was used for high-resolution mass spectrometry (HRMS).

## A. Experimental Workflow Procedures

### 1. Automated Reaction Set-up

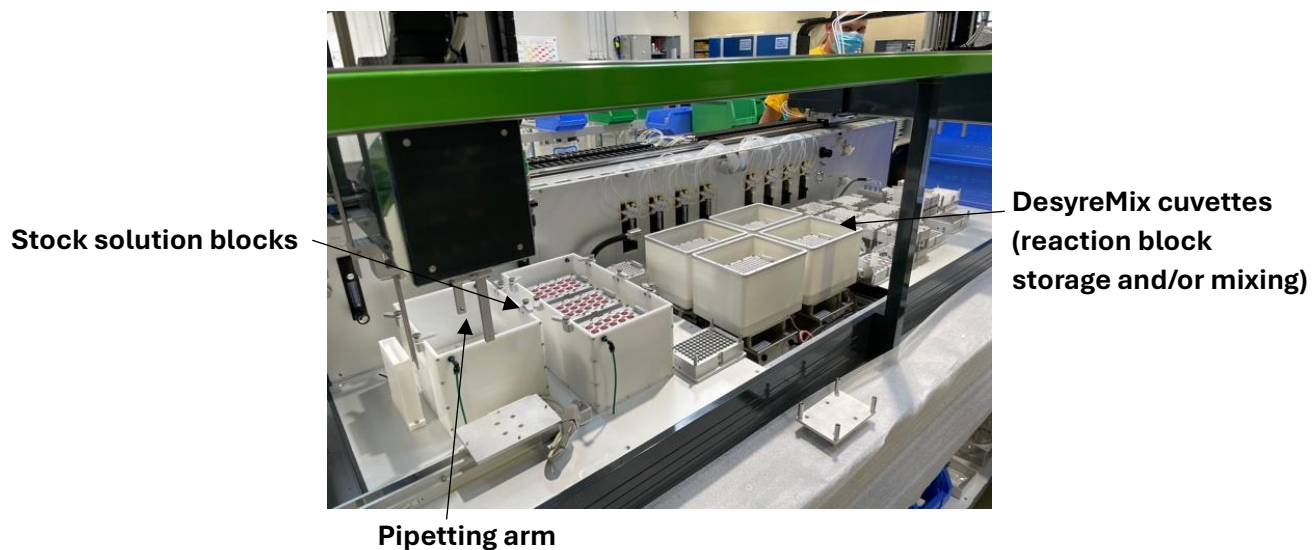

**Supplementary Figure 1** Illustration of the Zinsser robot pipetting deck

**Supplementary Table 1** Preparation of methanolic stock solutions of reagents for the first round of discovery

| ID       | SMILES                                                   | MW  | No of reactions | Mass (mg) | Stock volume (uL) | Stock conc (M) |
|----------|----------------------------------------------------------|-----|-----------------|-----------|-------------------|----------------|
| S1_1-Hy  | <chem>O=C(C1=CC=C(C(C)(C)C)=C1)NOC(C(C)(C)C)=O</chem>    | 277 | 6               | 93        | 500               | 0.67           |
| S1_2-Hy  | <chem>O=C(C1=C(OC)C(Cl)=CC(Cl)=C1)NOC(C(C)(C)C)=O</chem> | 320 | 12              | 203       | 950               | 0.67           |
| S1_3-Hy  | <chem>O=C(C1=C(C)C(F)=C(F)C=C1)NOC(C(C)(C)C)=O</chem>    | 271 | 10              | 145       | 800               | 0.67           |
| S1_4-Hy  | <chem>O=C(C1=CC(C)=CC(C)=C1)NOC(C(C)(C)C)=O</chem>       | 249 | 6               | 83        | 500               | 0.67           |
| S1_5-Hy  | <chem>O=C(C1=C(C)C=CC(F)=C1)NOC(C(C)(C)C)=O</chem>       | 253 | 5               | 67        | 425               | 0.67           |
| S1_6-Hy  | <chem>O=C(C1=CC=CC(C)=C1)NOC(C(C)(C)C)=O</chem>          | 235 | 4               | 55        | 350               | 0.67           |
| S1_7-Hy  | <chem>O=C(NOC(C(C)(C)C)=O)C1=CN2C(C(C)=CC=C2)=N1</chem>  | 275 | 11              | 161       | 875               | 0.67           |
| S1_8-Hy  | <chem>O=C(C1=CC=C(CC#N)C=C1)NOC(C(C)(C)C)=O</chem>       | 260 | 5               | 74        | 425               | 0.67           |
| S1_9-Hy  | <chem>O=C(NOC(C(C)(C)C)=O)C1=CC=C(C(F)(F)F)S1</chem>     | 295 | 18              | 277       | 1400              | 0.67           |
| S1_10-Hy | <chem>O=C(C1=CC=C(Br)C(F)=C1)NOC(C(C)(C)C)=O</chem>      | 318 | 3               | 59        | 275               | 0.67           |
| S1_11-Hy | <chem>O=C(C1=CC=CC=C1)NOC(C(C)(C)C)=O</chem>             | 221 | 4               | 52        | 350               | 0.67           |
| Co1_1    | <chem>C#CCCCC#N</chem>                                   | 93  | 5               | 29        | 425               | 0.73           |
| Co1_2    | <chem>C#CCNC1CCc2cccc21</chem>                           | 171 | 3               | 34        | 275               | 0.73           |
| Co1_3    | <chem>C#Cc1ccc(CC#N)cc1</chem>                           | 141 | 1               | 13        | 125               | 0.73           |
| Co1_4    | <chem>C#Cc1cccc2ccncc12</chem>                           | 153 | 5               | 47        | 425               | 0.73           |
| Co1_5    | <chem>C#Cc1cccs1</chem>                                  | 108 | 5               | 34        | 425               | 0.73           |
| Co1_6    | <chem>C#Cc1cn2ccnc2cn1</chem>                            | 143 | 4               | 37        | 350               | 0.73           |
| Co1_7    | <chem>C1=CCN(c2cccc2)C1</chem>                           | 145 | 4               | 37        | 350               | 0.73           |
| Co1_8    | <chem>C1=CCOCC1</chem>                                   | 84  | 4               | 21        | 350               | 0.73           |
| Co1_9    | <chem>C=CC(=O)N1CCOCC1</chem>                            | 141 | 5               | 44        | 425               | 0.73           |
| Co1_10   | <chem>C=CCc1cccc1</chem>                                 | 118 | 2               | 17        | 200               | 0.73           |
| Co1_11   | <chem>C=Cc1cc[nH]n1</chem>                               | 94  | 3               | 19        | 275               | 0.73           |
| Co1_12   | <chem>C=CC(=O)NC(C)C</chem>                              | 113 | 2               | 16        | 200               | 0.73           |



|        |                                         |     |    |      |      |      |
|--------|-----------------------------------------|-----|----|------|------|------|
| Co1_13 | <chem>CC1(C)C=Cc2cc(C#N)ccc2O1</chem>   | 185 | 4  | 47   | 350  | 0.73 |
| Co1_14 | <chem>CC1CC=CCC1</chem>                 | 96  | 1  | 10   | 125  | 0.73 |
| Co1_15 | <chem>C#Cc1ccc(N(C)C)cc1</chem>         | 145 | 1  | 13   | 125  | 0.73 |
| Co1_16 | <chem>C=CC[C@@H]1CC=C[C@@H](C)N1</chem> | 137 | 4  | 35   | 350  | 0.73 |
| Co1_17 | <chem>C#Cc1cc(C)ccc1C</chem>            | 130 | 3  | 26   | 275  | 0.73 |
| Co1_18 | <chem>C=Cc1ccc(C)nc1</chem>             | 119 | 3  | 24   | 275  | 0.73 |
| Co1_19 | <chem>C=CC1CC1(Cl)Cl</chem>             | 104 | 4  | 27   | 350  | 0.73 |
| Co1_20 | <chem>C=Cc1cc(Cl)ccn1</chem>            | 139 | 4  | 36   | 350  | 0.73 |
| Co1_21 | <chem>C#CCOc1cc(F)ccc1F</chem>          | 168 | 4  | 43   | 350  | 0.73 |
| Co1_22 | <chem>C#Cc1cc(F)ccc1F</chem>            | 138 | 1  | 13   | 125  | 0.73 |
| Co1_23 | <chem>C=Cc1cccc(F)c1</chem>             | 122 | 3  | 25   | 275  | 0.73 |
| Co1_24 | <chem>C=CC(F)(F)C(F)(F)Br</chem>        | 206 | 2  | 30   | 200  | 0.73 |
| Co1_25 | <chem>C#Cc1cccc(Br)c1</chem>            | 180 | 3  | 36   | 275  | 0.73 |
| Co1_26 | <chem>O=C1NC2C=CC1C2</chem>             | 109 | 1  | 10   | 125  | 0.73 |
| Co1_27 | <chem>C=CC1=CC=CC=C1</chem>             | 104 | 1  | 10   | 125  | 0.73 |
| Co1_28 | <chem>C#CCCCO</chem>                    | 70  | 1  | 7    | 125  | 0.73 |
| Co1_29 | <chem>C1CC=CO1</chem>                   | 70  | 1  | 7    | 125  | 0.73 |
| Rh cat | <chem>[Cp*RhCl2]2<sup>a</sup></chem>    | 618 | 96 | 61   | 3314 | 0.03 |
| Base   | <chem>CsOPiv</chem>                     | 234 | 96 | 2242 | 6386 | 1.5  |

<sup>a</sup> Sonicated for 5 min to ensure dissolution

**Supplementary Table 2** Preparation of methanolic stock solutions of reagents for the subsequent round of discovery

| ID       | SMILES                                                  | MW  | No of reactions | Mass (mg) | Stock volume (uL) | Stock conc (M) |
|----------|---------------------------------------------------------|-----|-----------------|-----------|-------------------|----------------|
| S2_1-Hy  | <chem>O=C(NOC(C(C)(C)C)=O)c1ccccc1</chem>               | 221 | 9               | 109       | 725               | 0.67           |
| S2_2-Hy  | <chem>O=C(NOC(C(C)(C)C)=O)c1ccc(F)cc1</chem>            | 239 | 4               | 57        | 350               | 0.67           |
| S2_3-Hy  | <chem>Cc1ccc(C(NOC(C(C)(C)C)=O)=O)cc1</chem>            | 235 | 6               | 80        | 500               | 0.67           |
| S2_4-Hy  | <chem>N#CCc1ccc(C(NOC(C(C)(C)C)=O)=O)cc1</chem>         | 260 | 9               | 128       | 725               | 0.67           |
| S2_5-Hy  | <chem>O=C(NOC(C(C)(C)C)=O)C1=CC=C(C(F)(F)F)S1</chem>    | 295 | 6               | 100       | 500               | 0.67           |
| S2_6-Hy  | <chem>CC1=CC=C(C(NOC(C(C)(C)C)=O)=O)S1</chem>           | 241 | 2               | 33        | 200               | 0.67           |
| S2_7-Hy  | <chem>N#CCc1cccc(C(NOC(C(C)(C)C)=O)=O)c1</chem>         | 260 | 12              | 167       | 950               | 0.67           |
| S2_8-Hy  | <chem>O=C(NOC(C(C)(C)C)=O)c1ccc(Br)c(F)c1</chem>        | 318 | 2               | 43        | 200               | 0.67           |
| S2_9-Hy  | <chem>O=C(NOC(C(C)(C)C)=O)C1=N[N]C(C2=CC=CS2)=C1</chem> | 292 | 5               | 85        | 425               | 0.67           |
| S2_10-Hy | <chem>O=C(NOC(C(C)(C)C)=O)C1=Cc2ncccc2O1</chem>         | 262 | 3               | 49        | 275               | 0.67           |
| S2_11-Hy | <chem>O=C(NOC(C(C)(C)C)=O)C1=CN2C(CC2)=N1</chem>        | 265 | 9               | 132       | 725               | 0.67           |
| S2_12-Hy | <chem>O=C(NOC(C(C)(C)C)=O)C1=CC=CS1</chem>              | 227 | 6               | 77        | 500               | 0.67           |
| S2_13-Hy | <chem>O=C(NOC(C(C)(C)C)=O)c1ccncc1</chem>               | 222 | 7               | 87        | 575               | 0.67           |
| Co2_1    | <chem>C#Cc1c(F)c(F)c(F)c(F)c1F</chem>                   | 192 | 3               | 53        | 375               | 0.73           |
| Co2_2    | <chem>C#Cc1c(C)ccc(C)c1</chem>                          | 130 | 2               | 29        | 300               | 0.73           |
| Co2_3    | <chem>C#Cc1ccc(C#C)cc1</chem>                           | 126 | 2               | 28        | 300               | 0.73           |
| Co2_4    | <chem>C#Cc1ccc(C)cc1</chem>                             | 116 | 5               | 45        | 525               | 0.73           |
| Co2_5    | <chem>C#Cc1cc(C#C)ccc1</chem>                           | 126 | 2               | 28        | 300               | 0.73           |
| Co2_6    | <chem>C#CC1CCCC1</chem>                                 | 94  | 3               | 26        | 375               | 0.73           |
| Co2_7    | <chem>C#Cc1c(C)cccc1</chem>                             | 116 | 7               | 57        | 675               | 0.73           |
| Co2_8    | <chem>C#CCOc1c(F)ccc(F)c1</chem>                        | 168 | 2               | 37        | 300               | 0.73           |
| Co2_9    | <chem>C#CCOc1ccccc1</chem>                              | 132 | 5               | 51        | 525               | 0.73           |
| Co2_10   | <chem>C=Cc1ccc(F)cc1</chem>                             | 122 | 4               | 40        | 450               | 0.73           |
| Co2_11   | <chem>C=Cc1ccc(C)cc1</chem>                             | 118 | 5               | 45        | 525               | 0.73           |

|        |                                       |     |    |      |      |      |
|--------|---------------------------------------|-----|----|------|------|------|
| Co2_12 | <chem>C=Cc1cc(CC2)c2cc1</chem>        | 130 | 1  | 21   | 225  | 0.73 |
| Co2_13 | <chem>C=Cc1ccccc1</chem>              | 104 | 6  | 46   | 600  | 0.73 |
| Co2_14 | <chem>C=Cc1c(C)cccc1</chem>           | 118 | 1  | 19   | 225  | 0.73 |
| Co2_15 | <chem>C=Cc1c(F)cccc1</chem>           | 122 | 3  | 33   | 375  | 0.73 |
| Co2_16 | <chem>C/C=C/c1ccccc1</chem>           | 118 | 2  | 26   | 300  | 0.73 |
| Co2_17 | <chem>C/C=C/C(C)C</chem>              | 84  | 2  | 18   | 300  | 0.73 |
| Co2_18 | <chem>C/C=C/CC#N</chem>               | 81  | 1  | 13   | 225  | 0.73 |
| Co2_19 | <chem>C=CC(Cl)(C(F)(Br)F)F</chem>     | 223 | 3  | 61   | 375  | 0.73 |
| Co2_20 | <chem>C=Cc1ccncc1</chem>              | 105 | 1  | 17   | 225  | 0.73 |
| Co2_21 | <chem>C=Cc1nccnc1</chem>              | 106 | 4  | 35   | 450  | 0.73 |
| Co2_22 | <chem>C#CCN(C)C</chem>                | 83  | 3  | 23   | 375  | 0.73 |
| Co2_23 | <chem>CC#CC(C)C</chem>                | 82  | 3  | 22   | 375  | 0.73 |
| Co2_24 | <chem>CN1C2C=CCC1CC2</chem>           | 123 | 3  | 34   | 375  | 0.73 |
| Co2_25 | <chem>N#CC1C[C@H]2C=C[C@@H]1C2</chem> | 119 | 3  | 33   | 375  | 0.73 |
| Co2_26 | <chem>O=C1C=CCCN1</chem>              | 97  | 4  | 32   | 450  | 0.73 |
| Rh cat | <chem>[Cp*RhCl2]2^a</chem>            | 618 | 96 | 61   | 3314 | 0.03 |
| Base   | <chem>CsOPiv</chem>                   | 234 | 96 | 2242 | 6386 | 1.5  |

<sup>a</sup> Sonicated for 5 min to ensure dissolution

**Supplementary Table 3** Dispensing order of reagents

| Addition order | Stock solution           | Volume per well (μL) | mmol reagent per well |
|----------------|--------------------------|----------------------|-----------------------|
| 1              | <chem>[Cp*RhCl2]2</chem> | 34                   | 0.001                 |
| 2              | <chem>CsOPiv</chem>      | 66                   | 0.1                   |
| 3              | Hydroxamate (A)          | 75                   | 0.05                  |
| 4              | Alkene/alkyne (B)        | 75                   | 0.055                 |

## 2. Quantification Protocol

### 2.1. Calibration of Quantification Method

**Supplementary Table 4** Preparation of multi-component calibration mixes at a range of concentrations. Seven calibration mixes were prepared, each containing all five components at equal individual concentrations of **0.5, 1.0, 2.5, 5.0, 7.5, 10.0, or 12.5 mg/mL**.

| Component in the mix                     | Source (supplier) | Individual component concentration range (mg/mL) | Solvent system (v:v)          |
|------------------------------------------|-------------------|--------------------------------------------------|-------------------------------|
| 7-hydroxyethyl theophylline <sup>a</sup> | Sigma-Aldrich     | 0.5–12.5                                         | DMSO:H <sub>2</sub> O (80:20) |
| Hydrocortisone                           | Sigma-Aldrich     |                                                  |                               |
| Dibenzyl 2,3-dihydroxysuccinate          | Fluorochem        |                                                  |                               |
| Dibenzyl succinate                       | Fluorochem        |                                                  |                               |
| Dibenzyl phthalate                       | Fisher Scientific |                                                  |                               |

<sup>a</sup> Sonicated for 5 min to ensure dissolution

1 µL of each of the seven calibration concentration mixes were injected in triplicate onto the UPLC-MS system. The ELSD peak areas and retention times were manually extracted from the generated results files.

Three-dimensional calibration surfaces were generated in Origin, with:

- **X-axis:** retention time (minutes)
- **Y-axis:** log (ELSD peak area)
- **Z-axis:** log (concentration)

**Supplementary Equation 1** The calibration surface curve

$$\log(\text{conc}) = A + B \times rt + C \times \log_{10}(\text{response area}) + D \times rt^2 + E \times rt \times \log_{10}(\text{response area}) + F \times (\log_{10}(\text{response area}))^2$$

(where *rt* = retention time)

## 2.2. Quantification Method Parameters

**Supplementary Table 5** Quantification parameters for crude reaction mixtures

| Parameter/Step        | Description/Setting                                                                                                  |
|-----------------------|----------------------------------------------------------------------------------------------------------------------|
| Solvent evaporation   | Genevac HT Series 3i; 200 mbar, 40 °C, 30 min                                                                        |
| Sample handling       | Hamilton liquid handler                                                                                              |
| Aliquoting            | 10 µL aliquot dissolved in 40 µL DMSO                                                                                |
| Plate format          | Shallow 96-wellplate                                                                                                 |
| Analysis method       | UPLC                                                                                                                 |
| Injection volume      | 1 µL                                                                                                                 |
| Column temperature    | C18 column, 40 °C                                                                                                    |
| Detection (PDA) range | 210-250 nm                                                                                                           |
| Detection (ELS)       | Nebuliser: cooling mode;<br>drift tube: 35 °C;<br>gas pressure: 60 psi;<br>gain: 30;<br>data acquisition rate: 40 Hz |
| Mobile phase A        | H <sub>2</sub> O + 0.1 % formic acid                                                                                 |
| Mobile phase B        | MeCN + 0.1 % formic acid                                                                                             |
| Flow rate             | 0.8 mL min <sup>-1</sup>                                                                                             |
| Gradient / run time   | Binary gradient / 3.5 min                                                                                            |

### 3. Purification Method Parameters

**Supplementary Table 6** Purification parameters for shortlisted crude reaction mixtures

| Parameter/Step        | Description/Setting                                                                                                            |
|-----------------------|--------------------------------------------------------------------------------------------------------------------------------|
| Sample selection      | Reactions with >15% analytical yield of new product(s) by MW                                                                   |
| Plate format          | Deep 96-wellplate                                                                                                              |
| Sample handling       | Preparative HPLC                                                                                                               |
| Injection volume      | 240 $\mu$ L                                                                                                                    |
| Column temperature    | C18 column, 40 $^{\circ}$ C                                                                                                    |
| Detection (PDA) range | 210-250 nm                                                                                                                     |
| Detection (ELS)       | Nebuliser: cooling mode;<br>drift tube: 35 $^{\circ}$ C;<br>gas pressure: 60 psi;<br>gain: 30;<br>data acquisition rate: 40 Hz |
| Mobile phase A        | H <sub>2</sub> O + 0.1 % formic acid                                                                                           |
| Mobile phase B        | MeCN + 0.1 % formic acid                                                                                                       |
| Flow rate             | 25 mL min <sup>-1</sup>                                                                                                        |
| Gradient / run time   | Binary gradient / 17.5 min                                                                                                     |

#### 4. Weighing, Drying and Plating of Isolated Products

**Supplementary Table 7** Purification parameters for shortlisted crude reaction mixtures

| Parameter/Step            | Description/Setting                                                                                                                |
|---------------------------|------------------------------------------------------------------------------------------------------------------------------------|
| Sample handling           | HTZ Selecta equipped with tube balance and barcode-guided sample handling                                                          |
| Tube labelling            | Thermal barcode printer; empty (tare) weight recorded                                                                              |
| Fraction tracking         | Post-HPLC fractions identified and tracked by barcode                                                                              |
| Solvent evaporation       | Genevac HT Series 3i;<br>200 mbar, 40 °C, 16 h                                                                                     |
| Weighing protocol         | Dried fractions reweighed three times using HTZ Selecta; mean value used to calculate net sample weight                            |
| Concentration calculation | Excel spreadsheet generated to determine acetonitrile (MeCN) volume for 10 mM final concentration                                  |
| Dissolution step          | Hamilton Microlab STAR used to add MeCN; included 1–2 min induction time with repeated aspiration/dispensing to ensure dissolution |
| Transfer to plate         | 50 µL of each solution transferred into shallow well plate                                                                         |
| Stock storage             | Remaining product stock solutions stored in deep well plates and catalogued                                                        |
| Second evaporation        | Shallow well plates evaporated overnight in Genevac (spinning only)                                                                |
| Post-processing           | Plates sealed and submitted for biological screening                                                                               |

## 5. Methods for Cell Painting Assay

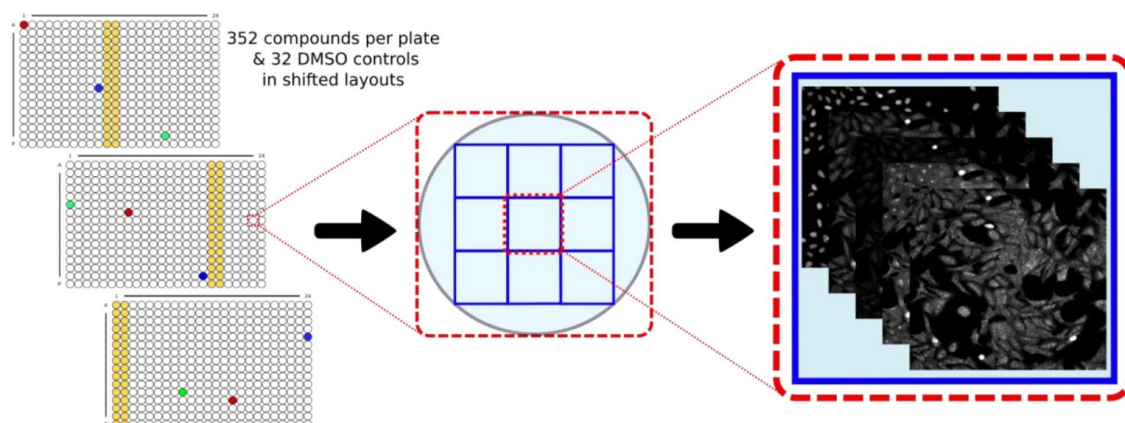

**Supplementary Figure 2** Overview of Cell Painting assay plate layout and image acquisition workflow.<sup>1</sup>

**Supplementary Table 8** Experimental parameters for the Cell Painting assay

| Parameter/Step         | Description/Setting                                                                                                                                                                                                                                   |
|------------------------|-------------------------------------------------------------------------------------------------------------------------------------------------------------------------------------------------------------------------------------------------------|
| Cell line              | U2OS (human osteosarcoma)                                                                                                                                                                                                                             |
| Plate format           | 384-well CellCarrier Ultra plate (PerkinElmer)                                                                                                                                                                                                        |
| Cell seeding           | 1,600 cells per well in 20 $\mu$ L medium (5 $\mu$ L pre-wet medium per well prior to seeding).                                                                                                                                                       |
| Pre-incubation         | 10 min ambient, then 4 h at 37 $^{\circ}$ C, 5 % CO <sub>2</sub>                                                                                                                                                                                      |
| Compound treatment     | Echo 520 acoustic dispenser (Labcyte); final concentrations 1–10 $\mu$ M; incubation 20 h (37 $^{\circ}$ C, 5 % CO <sub>2</sub> )                                                                                                                     |
| Staining panel         | Multiplexed fluorescent dyes labelling nuclei, mitochondria, actin, and membranes                                                                                                                                                                     |
| Mitochondrial staining | MitoTracker Deep Red (Thermo Fisher Scientific, Cat. No. M22426); Stock: 1 mM; final concentration: 100 nM in prewarmed medium; 25 $\mu$ L MitoTracker solution added per well; incubated 30 min in darkness (37 $^{\circ}$ C, 5 % CO <sub>2</sub> ). |
| Fixation               | 3.7 % formaldehyde in PBS (from 18.5 % stock), 20 min at ambient temperature in darkness                                                                                                                                                              |
| Permeabilization       | 0.1 % Triton X-100 in PBS, 15 min at ambient temperature in darkness                                                                                                                                                                                  |
| Blocking and staining  | 25 $\mu$ L of staining solution containing 1 % BSA in buffer and the following fluorescent conjugates:                                                                                                                                                |



|                  |                                                                                                                                                                                                                                                                                                                                                                                                                                                                                                                                      |
|------------------|--------------------------------------------------------------------------------------------------------------------------------------------------------------------------------------------------------------------------------------------------------------------------------------------------------------------------------------------------------------------------------------------------------------------------------------------------------------------------------------------------------------------------------------|
|                  | Hoechst 33342 (5 $\mu\text{g mL}^{-1}$ ; Sigma, Cat. No. B2261-25 mg)<br><br>Phalloidin–Alexa 594 (5 $\mu\text{L mL}^{-1}$ ; Thermo Fisher Scientific, Cat. No. A12381)<br><br>Concanavalin A–Alexa 488 (25 $\mu\text{g mL}^{-1}$ ; Thermo Fisher Scientific, Cat. No. C11252)<br><br>WGA–Alexa 594 (1.5 $\mu\text{g mL}^{-1}$ ; Thermo Fisher Scientific, Cat. No. W11262)<br><br>SYTO 14 (1.5 $\mu\text{M}$ ; Thermo Fisher Scientific, Cat. No. S7576)<br><br>The plate was incubated for 30 min at room temperature in darkness. |
| Washing          | 3 $\times$ 70 $\mu\text{L}$ PBS (BioTek Elx405 washer)                                                                                                                                                                                                                                                                                                                                                                                                                                                                               |
| Final handling   | PBS left in wells post-wash; plates sealed and centrifuged 1 min at 500 rpm                                                                                                                                                                                                                                                                                                                                                                                                                                                          |
| Imaging system   | Molecular Devices ImageXpress Micro XL;<br>20 $\times$ objective; 9 sites/well; 5 channels<br>(DAPI: Ex350-400/ Em410-480;<br>FITC: Ex470-500/ Em510- 540;<br>Spectrum Gold: Ex520-545/ Em560-585;<br>TxRed: Ex535-585/ Em600-650;<br>Cy5: Ex605-650/ Em670-715)                                                                                                                                                                                                                                                                     |
| Image analysis   | CellProfiler v3.0.0; 1,716 features/site aggregated per well and replicate                                                                                                                                                                                                                                                                                                                                                                                                                                                           |
| Feature curation | Robustness filtering; <sup>2</sup> 579 reproducible features retained                                                                                                                                                                                                                                                                                                                                                                                                                                                                |
| Cell line        | U2OS (human osteosarcoma)                                                                                                                                                                                                                                                                                                                                                                                                                                                                                                            |

1716

*Determined by CellProfiler*

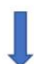

*Keep features that have a minimum correlation of 0.80 between repeats for all cpds.*

579

*Final set of relevant features.  
Used for all further analyses*

**Supplementary Figure 3** Feature extraction and selection workflow. Images were processed with *CellProfiler* (v3.0.0) to extract 1,716 morphological features per site. Features were aggregated as medians per well (9 sites per well) and then over the 3 replicates. Data analysis: Python (pandas, dask, scipy). Reproducibility filtering, following Woehrman et al.<sup>2</sup> retained features showing a similarity  $\geq 0.8$  between biological repeats of reference plates, yielding 579 robust features used for all subsequent analyses.

**Supplementary Equation 3** Calculation of Z-scores for phenotypic features. Z-scores were calculated as the difference between the measured feature value and the control median, normalised by the median absolute deviation (MAD) of the controls. This defines how many MADs a feature value is away from the control median, as illustrated below. The phenotypic compound profile is then determined as the list of Z-scores of all features for one compound.

$$z\_score = \frac{value_{measured} - median_{controls}}{MAD_{controls}}$$

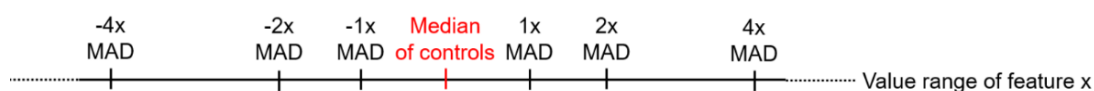

**Supplementary Equation 4** An induction value was determined for each compound as the fraction of significantly changed features, in percent

$$Induction [\%] = \frac{\text{number of features with abs. values} > 1}{\text{total number of features}}$$

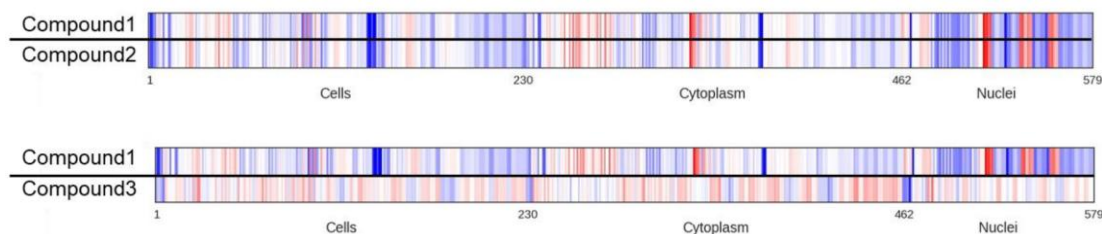

**Supplementary Figure 4** Similarities between phenotypic profiles were computed using correlation distance (*scipy.spatial.distance.correlation*; Similarity = 1 – Correlation Distance). Each coloured band represents the Z-score of an individual morphological feature. Shown are examples of two compounds with high (top, 96 % similarity) and low (bottom, 0 % similarity) phenotypic similarity.

## 6. KNIME Workflow for Filtering Substrates/Co-substrates

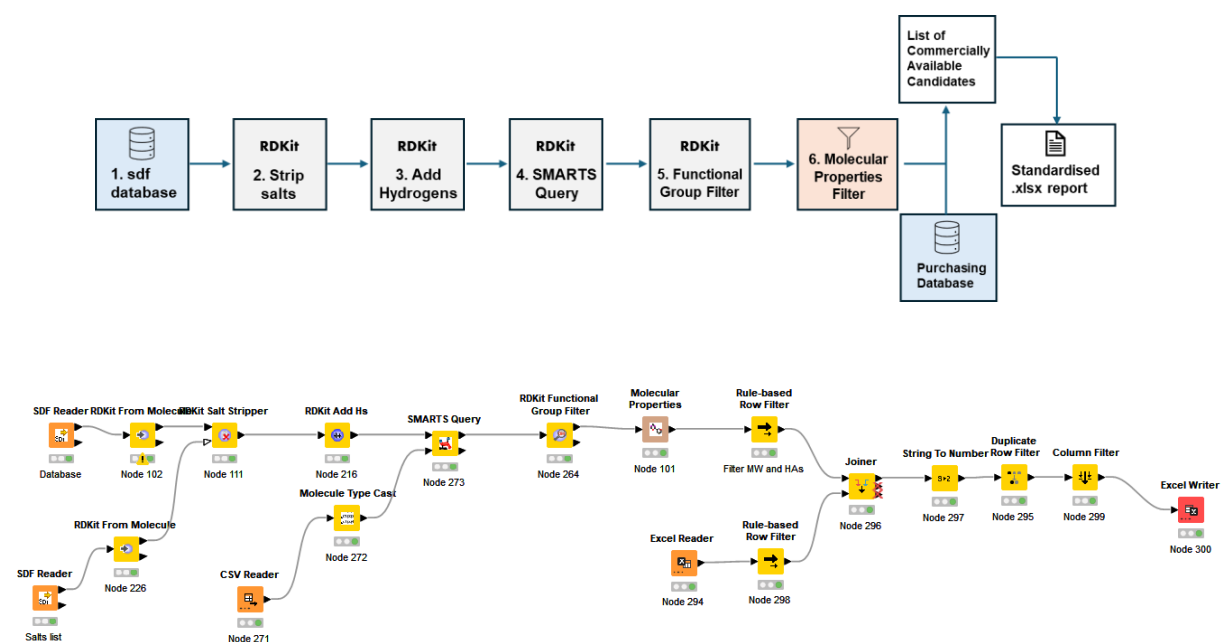

**Supplementary Figure 5** Schematic overview of the KNIME workflow. The KNIME workflow and supporting files are available on GitHub ([link](#)). The top panel shows a conceptual design of the workflow, while the bottom panel displays a screenshot of the implemented pipeline within the KNIME environment.

**SDF Reader** - Reads in the input database of molecular structures from an SDF (Structure Data File) format. This serves as the starting point of the workflow, importing chemical information such as atom coordinates, connectivity, and metadata.

**RDKit From Molecule** - Converts the imported molecular structures into RDKit-compatible objects, enabling further cheminformatics operations using RDKit's toolkit. This step ensures compatibility and standardisation across subsequent nodes.

**RDKit Salt Stripper** - Removes salts and counterions from the molecules to improve chemical consistency. The node uses RDKit's standard salt list by default but can also be configured with a user-defined list of undesired fragments, typically read via an additional SDF Reader node and merged.

**RDKit Add Hs** - Adds explicit hydrogen atoms to the molecular structures. This step is critical for accurate substructure searching, as it ensures hydrogen counts are properly considered during SMARTS-based matching and reduces false negatives due to implicit hydrogen discrepancies.

**SMARTS Query** - Applies user-defined SMARTS (SMiles ARbitrary Target Specification) patterns to search for specific substructures within the molecules. The SMARTS patterns are imported from a CSV file and can represent functional groups, scaffolds, or motifs of interest. This enables highly customisable substructure filtering.

**Functional Group Filter** - Filters out molecules containing reactive or undesirable functional groups. The filter contains an editable list of SMARTS patterns representing these groups, and a dropdown interface allows users to enable or disable specific exclusions without modifying the SMARTS file directly.

**Molecular Properties** - Calculates key physicochemical properties of each molecule, including molecular weight (MW), hydrogen bond donors (HBDs), and acceptors (HBAs). These computed values are essential for evaluating drug-likeness and other developability criteria.

**Rule-based Row Filter** - Applies filtering rules to retain only molecules that meet predefined property thresholds (e.g.,  $MW < 500$ ,  $HBD \leq 5$ ). This step narrows the dataset to compounds with favourable developability profiles.

**Excel Reader** - Loads a list of commercially available compounds from an Excel file, typically representing the internal or external procurement catalogue.

**Joiner** - Matches the filtered set of molecules against the commercial availability list. Only compounds that exist in both datasets are retained, ensuring that subsequent selections are available for purchase.

**String to Number, Duplicate Row Filter, Column Filter** - Converts text-based values into numerical formats as needed for downstream operations or reporting, ensuring data consistency. Removes duplicate molecular entries to prevent redundancy and ensure unique compound representation in the final dataset. Eliminates unnecessary columns from the dataset, simplifying the output and focusing only on relevant information for reporting or export.

**Excel Writer** - Outputs the final, curated list of compounds to an Excel file. This file includes all necessary annotations and filtered data, ready for reporting, sharing, or further analysis.

**Supplementary Table 9** Functional group dictionary, adapted from the version created by Greg Landrum, 2006, Copyright (c) 2010, Novartis Institutes for BioMedical Research Inc.

| Functional Group                          | SMARTS                                                                                       |
|-------------------------------------------|----------------------------------------------------------------------------------------------|
| <b>Alkenes/Alkynes/Conjugates</b>         |                                                                                              |
| Alkene                                    | <chem>[CX3]=[CX3]</chem>                                                                     |
| Alkene.Substituted                        | <chem>[CX3]=C(C)(C)</chem>                                                                   |
| Alkene.Cyclic                             | <chem>C[CX3]=C(c)(C)</chem>                                                                  |
| Alkenyl.Halide                            | <chem>[F,Cl,Br,I][CX3]=[CX3]</chem>                                                          |
| Diene                                     | <chem>[C]=[C][C]=[C]</chem>                                                                  |
| Alkyne                                    | <chem>[\$([CX2]#C)]</chem>                                                                   |
| Ethyl chain                               | <chem>[*][CH2][CH3]</chem>                                                                   |
| Isopropyl chain                           | <chem>[*][CH]([CH3])([CH3])</chem>                                                           |
| Cyclopropyl                               | <chem>C1CC1</chem>                                                                           |
| Cyclobutyl                                | <chem>C1CCC1</chem>                                                                          |
| Cyclopentyl                               | <chem>C1CCCC1</chem>                                                                         |
| <b>Carboxylic Acids &amp; Derivatives</b> |                                                                                              |
| CarboxylicAcid                            | <chem>C(=O)[O;H,-]</chem>                                                                    |
| Carboxylate                               | <chem>[CX3](=[OX1])O</chem>                                                                  |
| CarboxylicAcid.Aromatic                   | <chem>[\$(C-!@[a])](=O)([O;H,-])</chem>                                                      |
| CarboxylicAcid.Aliphatic                  | <chem>[\$(C-!@[A;!O])](=O)([O;H,-])</chem>                                                   |
| CarboxylicAcid.AlphaAmino                 | <chem>[\$(C-[C;!\$(C=[!#6])]-[N;!H0;!\$(N-[!#6;!#1]);!\$(N-C=[O,N,S])]])(=O)([O;H,-])</chem> |
| CarboxylicAcid.AlphaHalo                  | <chem>[F,Cl,Br,I]cc([\$(C-!@[a])](=O)([O;H,-]))</chem>                                       |
| <b>Acid Derivatives</b>                   |                                                                                              |
| AcidChloride                              | <chem>C(=O)Cl</chem>                                                                         |
| AcidChloride.Aromatic                     | <chem>[\$(C-!@[a])](=O)(Cl)</chem>                                                           |
| AcidChloride.Aliphatic                    | <chem>[\$(C-!@[A;!Cl])](=O)(Cl)</chem>                                                       |
| Anhydride                                 | <chem>[CX3](=[OX1])[OX2][CX3](=[OX1])</chem>                                                 |
| Ester                                     | <chem>[CX3](=O)[OX2H0][!#6]</chem>                                                           |
| Ester.Cyclic                              | <chem>[CX3;R](=O)[OX2H0;R]</chem>                                                            |
| Lactone                                   | <chem>[!#6;r](=[OX1])[oX2;r]</chem>                                                          |
| Peracid                                   | <chem>C(=O)OO[H]</chem>                                                                      |
| CarboxylicPhosphate                       | <chem>C(=O)O[P]</chem>                                                                       |
| SulfonylChloride                          | <chem>[\$(S-!@[!#6])](=O)(=O)(Cl)</chem>                                                     |
| SulfonylChloride.Aromatic                 | <chem>[\$(S-!@[c])](=O)(=O)(Cl)</chem>                                                       |
| SulfonylChloride.Aliphatic                | <chem>[\$(S-!@[C])](=O)(=O)(Cl)</chem>                                                       |
| <b>Amines</b>                             |                                                                                              |
| Amine                                     | <chem>[N;!H0;\$ (N-[!#6]);!\$(N-[!#6;!#1]);!\$(N-C=[O,N,S])]</chem>                          |
| Amine.Aromatic                            | <chem>[N;!H0;\$ (N-c);!\$(N-[!#6;!#1]);!\$(N-C=[O,N,S])]</chem>                              |
| Amine.Aliphatic                           | <chem>[N;!H0;\$ (N-c);!\$(N-C);!\$(N-[!#6;!#1]);!\$(N-C=[O,N,S])]</chem>                     |
| Amine.Primary                             | <chem>[N;H2;D1;\$ (N-!@[!#6]);!\$(N-C=[O,N,S])]</chem>                                       |
| Amine.Primary.Aromatic                    | <chem>[N;H2;D1;\$ (N-!@[c]);!\$(N-C=[O,N,S])]</chem>                                         |
| Amine.Primary.Aliphatic                   | <chem>[N;H2;D1;\$ (N-!@[C]);!\$(N-C=[O,N,S])]</chem>                                         |
| Amine.Secondary                           | <chem>[N;H1;D2;\$ (N-(!#6)-[!#6]);!\$(N-[!#6;!#1]);!\$(N-C=[O,N,S])]</chem>                  |
| Amine.Secondary.Aromatic                  | <chem>[N;H1;D2;\$ (N-(!c)-[!#6]);!\$(N-[!#6;!#1]);!\$(N-C=[O,N,S])]</chem>                   |
| Amine.Secondary.Aliphatic                 | <chem>[N;H1;D2;\$ (N-(C)-C);!\$(N-[!#6;!#1]);!\$(N-C=[O,N,S])]</chem>                        |
| Amine.Cyclic                              | <chem>[N;!H0;R;\$ (N-[!#6]);!\$(N-[!#6;!#1]);!\$(N-C=[O,N,S])]</chem>                        |
| <b>Boronic Acids</b>                      |                                                                                              |
| BoronicAcid                               | <chem>[\$(B-!@[!#6])](O)(O)</chem>                                                           |
| BoronicAcid.Aromatic                      | <chem>[\$(B-!@[c])](O)(O)</chem>                                                             |
| BoronicAcid.Aliphatic                     | <chem>[\$(B-!@[C])](O)(O)</chem>                                                             |
| <b>Isocyanate</b>                         |                                                                                              |
| Isocyanate                                | <chem>[\$(N-!@[!#6])](=!@C=!@O)</chem>                                                       |
| Isocyanate.Aromatic                       | <chem>[\$(N-!@[c])](=!@C=!@O)</chem>                                                         |
| Isocyanate.Aliphatic                      | <chem>[\$(N-!@[C])](=!@C=!@O)</chem>                                                         |
| <b>Alcohols/Acetals/Epoxides</b>          |                                                                                              |



|                               |                                              |
|-------------------------------|----------------------------------------------|
| Sulfide                       | [c,C]SC                                      |
| <b>Rings and Heterocycles</b> |                                              |
| Dihydropyrrole                | C1C=CC[NH]1                                  |
| 2-Pyridone                    | O=c1n*ccc1                                   |
| 4-Pyridone                    | O=c1ccncc1                                   |
| Pyran-one                     | O=c1ccocc1                                   |
| All substituted benzene       | [cH0]1[cH0][cH0][cH0][cH0][cH0]1             |
| <b>Miscellaneous</b>          |                                              |
| Isonitrile                    | [CX1-]#[NX2+]                                |
| Ene.Nitrile                   | [CX3]=[CX3]-C#N                              |
| N-Carbonyl.Amine              | *C(=O)N(C*)([H])[H])C*([H])[H]               |
| N-Boc.Aliphatic.Amine         | *C([H])([H])N(C(=O)OC(C)(C)C)C*([H])[H]      |
| N-Acyl.Aliphatic.Amine        | *C([H])([H])N(C(=O)C([H])([H])[H])C*([H])[H] |
| N-Chloroacetamide             | *C([H])([H])N(C(=O)C[Br,I,Cl,F])C*([H])[H]   |
| Aromatic N+                   | [n+]                                         |
| Aliphatic N+                  | [N+]                                         |
| <b>Metals/Elements</b>        |                                              |
| Zinc                          | [Zn]                                         |
| Magnesium                     | [Mg]                                         |
| Lithium                       | [Li]                                         |
| Tin                           | [Sn]                                         |
| Copper                        | [Cu]                                         |
| Silicon                       | [Si]                                         |
| Palladium                     | [Pd]                                         |
| Boron                         | [B]                                          |
| Ruthenium                     | [Ru]                                         |
| Germanium                     | [Ge]                                         |
| Aluminium                     | [Al]                                         |
| Deuterium                     | [2H]                                         |
| 13C                           | [13c,13C]                                    |
| 15N                           | [15n,15N]                                    |

**Supplementary Table 10** Node configuration for carboxylic acid filtering

| Node/Step                               | Description/Configuration                                                                                       |                                                                                                              |                   |
|-----------------------------------------|-----------------------------------------------------------------------------------------------------------------|--------------------------------------------------------------------------------------------------------------|-------------------|
| <b>SMARTS Query</b>                     | <chem>[cH][c]C(=O)[O;H,-]</chem><br>Selects aromatic carboxylic acids with at least one available tertiary α-CH |                                                                                                              |                   |
| <b>Functional Group Filter</b>          | All dictionary SMARTS <b>excluded except</b> those listed below:                                                |                                                                                                              |                   |
|                                         | <b>Functional Group</b>                                                                                         | <b>SMARTS</b>                                                                                                |                   |
|                                         | CarboxylicAcid                                                                                                  | <chem>C(=O)[O;H,-]</chem>                                                                                    |                   |
|                                         | Acetal                                                                                                          | <chem>[CX4H1,H2,H3](-O)(-O)</chem>                                                                           |                   |
|                                         | Amide                                                                                                           | <chem>[NX3][CX3]=[OX1]</chem>                                                                                |                   |
|                                         | Halogen                                                                                                         | <chem>[\$([F,Cl,Br,I]-!@[#6]);!\$([F,Cl,Br,I]-!@C-!@[F,Cl,Br,I]);!\$([F,Cl,Br,I]-[C,S](=[D1;O,S,N]))]</chem> |                   |
|                                         | Halogen.Aromatic                                                                                                | <chem>[F,Cl,Br,I;\$(*-!@c)]</chem>                                                                           |                   |
|                                         | N-Carbonyl.Amine                                                                                                | <chem>*C(=O)N(C*)([H])[H]C(*)([H])[H]</chem>                                                                 |                   |
|                                         | N-Boc.Aliphatic.Amine                                                                                           | <chem>*C([H])([H])N(C(=O)OC(C)(C)C)C(*)([H])[H]</chem>                                                       |                   |
|                                         | N-Acyl.Aliphatic.Amine                                                                                          | <chem>*C([H])([H])N(C(=O)C([H])([H])[H])C(*)([H])[H]</chem>                                                  |                   |
| <b>Molecular Property Calculations</b>  | <b>Property</b>                                                                                                 | <b>Description</b>                                                                                           |                   |
|                                         | Heavy Atoms Count                                                                                               | Total number of non-hydrogen atoms                                                                           |                   |
|                                         | XLogP                                                                                                           | Predicted partition coefficient (lipophilicity)                                                              |                   |
|                                         | Rotatable Bonds Count (non-terminal)                                                                            | Count of rotatable bonds excluding terminal groups                                                           |                   |
| <b>Rule-Based Row Filter Conditions</b> | <b>Property</b>                                                                                                 | <b>Filter Condition</b>                                                                                      | <b>Include If</b> |
|                                         | Heavy Atoms Coun                                                                                                | ≥6                                                                                                           | TRUE              |
|                                         | Heavy Atoms Count                                                                                               | ≤13                                                                                                          | TRUE              |
|                                         | XLogP                                                                                                           | ≤3.5                                                                                                         | TRUE              |
|                                         | XLogP                                                                                                           | ≥-0.5                                                                                                        | TRUE              |
|                                         | Rotatable Bonds (non-terminal)                                                                                  | ≤2                                                                                                           | TRUE              |



**Supplementary Table 11** Node Configuration for alkene/alkyne filtering

| Node/Step                               | Description/Configuration                                                                                              |                                                                                                 |                   |
|-----------------------------------------|------------------------------------------------------------------------------------------------------------------------|-------------------------------------------------------------------------------------------------|-------------------|
| <b>SMARTS Query</b>                     | [C;H1,H2]=[C;H1,H2] and [C;H0,H1]#[C;H0,H1]<br>Selects any alkene/alkyne with no more than one substituent at each end |                                                                                                 |                   |
| <b>Functional Group Filter</b>          | All dictionary SMARTS <b>excluded except</b> those listed below:                                                       |                                                                                                 |                   |
|                                         | <b>Functional Group</b>                                                                                                | <b>SMARTS</b>                                                                                   |                   |
|                                         | Alkene                                                                                                                 | [CX3]=[CX3]                                                                                     |                   |
|                                         | Alkene.Substituted                                                                                                     | [CX3]=C(C)(C)                                                                                   |                   |
|                                         | Alkene.Cyclic                                                                                                          | C[CX3]=C(c)(C)                                                                                  |                   |
|                                         | Alkyne                                                                                                                 | [\$([CX2]#C)]                                                                                   |                   |
|                                         | Ethyl chain                                                                                                            | [*][CH2][CH3]                                                                                   |                   |
|                                         | Isopropyl chain                                                                                                        | [*][CH]([CH3])([CH3])                                                                           |                   |
|                                         | Cyclopropyl                                                                                                            | C1CC1                                                                                           |                   |
|                                         | Cyclobutyl                                                                                                             | C1CCC1                                                                                          |                   |
|                                         | Cyclopentyl                                                                                                            | C1CCCC1                                                                                         |                   |
|                                         | Amine                                                                                                                  | [N;!H0;\$ (N-[#6]);!\$ (N-[!#6;!#1]);!\$ (N-C=[O,N,S])]                                         |                   |
|                                         | Amine.Aromatic                                                                                                         | [N;!H0;\$ (N-c);!\$ (N-[!#6;!#1]);!\$ (N-C=[O,N,S])]                                            |                   |
|                                         | Amine.Aliphatic                                                                                                        | [N;!H0;!\$ (N-c);\$ (N-C);!\$ (N-[!#6;!#1]);!\$ (N-C=[O,N,S])]                                  |                   |
|                                         | Amine.Secondary                                                                                                        | [N;H1;D2;\$ (N(-[#6])-[#6]);!\$ (N-[!#6;!#1]);!\$ (N-C=[O,N,S])]                                |                   |
|                                         | Amine.Secondary.Aromatic                                                                                               | [N;H1;D2;\$ (N(-[c])-[#6]);!\$ (N-[!#6;!#1]);!\$ (N-C=[O,N,S])]                                 |                   |
|                                         | Amine.Secondary.Aliphatic                                                                                              | [N;H1;D2;\$ (N(-C)-C);!\$ (N-[!#6;!#1]);!\$ (N-C=[O,N,S])]                                      |                   |
|                                         | Amine.Cyclic                                                                                                           | [N;!H0;R;\$ (N-[#6]);!\$ (N-[!#6;!#1]);!\$ (N-C=[O,N,S])]                                       |                   |
|                                         | Enone                                                                                                                  | [#6]=[#6]-[#6](=O)                                                                              |                   |
|                                         | Enone.Aromatic                                                                                                         | [c]=[C]-[C](=O)                                                                                 |                   |
|                                         | Amide                                                                                                                  | [NX3][CX3]=[OX1]                                                                                |                   |
|                                         | Acrylamide                                                                                                             | [CX3]=C[CX3](=[OX1])[NX3]                                                                       |                   |
|                                         | Halogen                                                                                                                | [\$([F,Cl,Br,I]-!@[#6]);!\$([F,Cl,Br,I]-!@C-!@[F,Cl,Br,I]);!\$([F,Cl,Br,I]-[C,S])(=[D1;O,S,N])] |                   |
|                                         | Halogen.Aromatic                                                                                                       | [F,Cl,Br,I;\$ (*-!@c)]                                                                          |                   |
|                                         | N-Carbonyl.Amine                                                                                                       | *C(=O)N(C*)([H])([H])C*([H])[H]                                                                 |                   |
|                                         | N-Boc.Aliphatic.Amine                                                                                                  | *C([H])([H])N(C(=O)OC(C)(C)C)([H])[H]                                                           |                   |
|                                         | N-Acyl.Aliphatic.Amine                                                                                                 | *C([H])([H])N(C(=O)C([H])([H])[H])C*([H])[H]                                                    |                   |
| <b>Molecular Property Calculations</b>  | <b>Property</b>                                                                                                        | <b>Description</b>                                                                              |                   |
|                                         | Heavy Atoms Count                                                                                                      | Total number of non-hydrogen atoms                                                              |                   |
|                                         | XLogP                                                                                                                  | Predicted partition coefficient (lipophilicity)                                                 |                   |
|                                         | Rotatable Bonds Count (non-terminal)                                                                                   | Count of rotatable bonds excluding terminal groups                                              |                   |
| <b>Rule-Based Row Filter Conditions</b> | <b>Property</b>                                                                                                        | <b>Filter Condition</b>                                                                         | <b>Include If</b> |
|                                         | Heavy Atoms Coun                                                                                                       | <6                                                                                              | TRUE              |

|  |                                |       |      |
|--|--------------------------------|-------|------|
|  | Heavy Atoms Count              | >14   | TRUE |
|  | XLogP                          | >3.5  | TRUE |
|  | XLogP                          | <-1.5 | TRUE |
|  | Rotatable Bonds (non-terminal) | >2    | TRUE |

## 7. Methods for Cell Biology

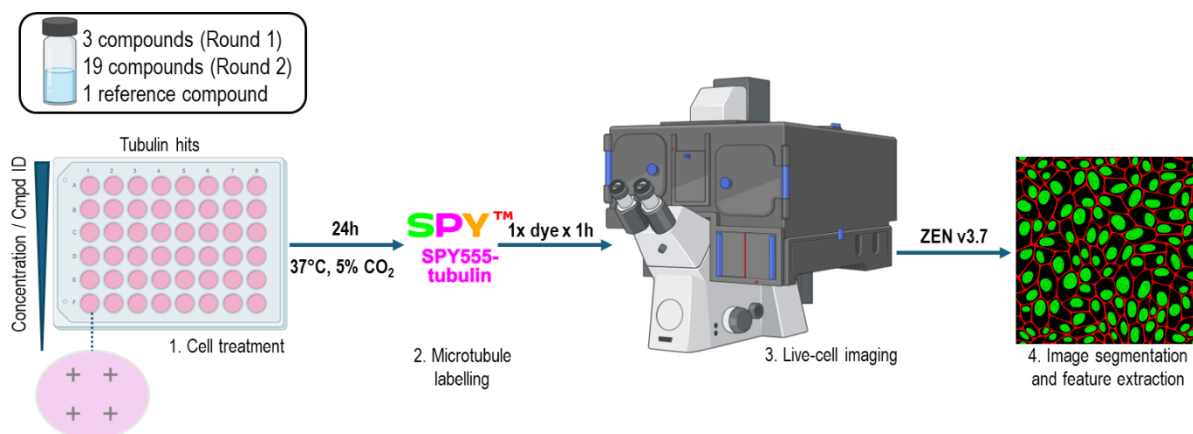

**Supplementary Figure 6** Schematic illustration of the workflow for microscopic analysis of microtubule alterations in HeLa cells 1. HeLa cells were treated in 96-well plates with varying compounds or concentrations of selected hits. 2. Microtubules (MT) were labelled using a cell-permeable, tubulin-specific fluorescent probe. 3. Labelled cells were imaged on a confocal microscope, acquiring 4 fields per well with autofocus set to the SYP-555 fluorescence signal. 4. Images were processed and segmented in ZEN software, and data were aggregated by field, well, and compound ID.

### A) Live cell microtubule (MT) imaging

HeLa cells were maintained in DMEM high-glucose medium (Thermo Fisher, Life Technologies) supplemented with 10% fetal bovine serum (GE Hyclone, Cytiva) at 37°C in a humidified 5% CO<sub>2</sub> incubator. For microtubule (MT) labelling, cells were counted in haemocytometer and seeded ( $1.9 \times 10^3$  cells/well) onto film-bottom chimney 96-well black plates (Greiner, cat No 655866). Cells were incubated overnight prior to compound addition.

Test compounds were prepared as 10 mM DMSO stocks and diluted to 20× working solutions (e.g., 15 µM stocks for a 750 nM test) in a final volume of 200 µl per well; the final DMSO concentration did not exceed 0.05% (v/v). After 24 h compound exposure, cells were washed three times with 150 µl pre-warmed PBS buffer and resuspended in 60 µl of the cell permeable **SPY555-tubulin** (Spirochrome) probe (Abs<sub>555nm</sub>/Em<sub>580nm</sub>). Briefly, the probe was diluted to 1X in fresh DMEM and incubated for 50 min. DNA was labelled adding 5 µg/ml of Hoechst 33342 dye (TargetMol Chemicals Inc) and incubated for additional 10 minutes.

Following dye incubation, cells were washed twice with PBS solution and resuspended in 150 µl of Hanks' balanced salt solution for further imaging. Fluorescence microscopy data were acquired in an Axio observer LSM 980 confocal microscope (Carl Zeiss) under 20X magnification lens and UV (405 nm), AF555 (561 nm), oblique (PMT) detection filters. A tile of 384 acquisition events was set where 4 fields per well were acquired in duplicate for each treatment (Supp Fig. 1).

### B) MT imaging data analysis

The resulting images were processed with ZEN software v3.7 (Carl Zeiss) using the trainable annotation tool ZEN Intellesis for image segmentation. Classes of interest corresponding to MT-labelling, DNA and background were defined from DMSO and nocodazole-treated cells. Once segmentation was completed, multiple biological features were measured and values

corresponding to individual objects (cells) were exported in tabular format. Data were aggregated by calculating median values per field, and then over the two replicates.

### **C) Immunofluorescence microscopy**

HeLa cells ( $1 \times 10^5$  cells/well) were seeded onto sterile glass cover slips and incubated overnight in 12-well plates using standard DMEM. Hit compounds were added ( $1 \mu\text{M}$ ) and incubated for 24h at  $37^\circ\text{C}$  degrees. Following compound treatment, cells were fixed using image iT 4% formaldehyde solution in PBS (Fisher Scientific Ltd) for 1h at room temperature and then permeabilised with 0.1% Triton X-100 in PBS (15 min). Cells were washed three times in PBS buffer prior to addition of blocking solution (10% bovine serum albumin, 99.9% purity) (Sigma Aldrich). Antibody labelling was performed using a mix of anti-alpha-tubulin FITC (Thermo, Fisher Scientific Ltd) (1:1,000) and the anti-histone H3 (phospho-Ser10) (Abcam) diluted (1:400) in a solution of freshly prepared 2% BSA in PBS (w/v), and incubated overnight at  $4^\circ\text{C}$ . Coverslips were washed five times with PBS and probed against goat anti-rabbit IgG secondary antibody conjugated to Alexa Fluor 565 (1: 800) (Thermo, Fisher Scientific Ltd) for 1h at room temperature. DNA was counterstained by adding  $0.2 \mu\text{g/ml}$  of DAPI solution in PBS (Thermo, Fisher Scientific Ltd) for five minutes. Cover slips were washed out with PBS solution and mounted on glass slides using Everbrite™ (Biotium) wet set mounting media and sealed with Covergrip™ (Biotium). Samples were imaged in an Axio observer LSM 980 confocal microscope (Carl Zeiss) under 40X magnification lens and the UV (465 nm), AF555 (603 nm), and FITC (517 nm) detection filters. Z-stacks were analysed using Fiji software version 1.54p (<http://imagej.org>) and red channel projection was used to quantify phospho-histone H3 foci using the 'Find Maxima' tool (prominence >15, single points, strict) for individual snapshots. Data was analysed in Microsoft Excel and box plot was produced using Origin Pro 2024b (OriginLab).

### **D) *In vitro* tubulin polymerisation assay**

Tubulin polymerisation rates were measured spectrophotometrically as described previously. Tubulin was kindly provided by Prof Michelle Peckham research group (Faculty of Biological Sciences, University of Leeds), following a previously described methodology.<sup>3</sup> Active tubulin was purified using a glycerol cushion (60% v/v) and ultracentrifugation cycles after GTP-induced polymerisation at  $37^\circ\text{C}$ , as previously described.<sup>4</sup> Recycled tubulin was dissolved in 1x IB buffer (containing 50 mM potassium glutamate and 0.5 mM  $\text{MgCl}_2$  pH 7.0) and snap frozen in aliquots of approximately  $25 \mu\text{M}$  ( $\epsilon_{280\text{nm}} = 115,000 \text{ M}^{-1} \text{ cm}^{-1}$ ). Tubulin polymerisation was measured in BRB80 buffer (80 mM K-PIPES pH 6.9, 2 mM  $\text{MgCl}_2$  and 0.5 mM EGTA) adding  $10 \mu\text{M}$  of tubulin per reaction on a 96-well plate. Compounds were added to the plate and incubated for 20 minutes at room temperature. Then, plate was transferred to ice and incubated for 20 minutes prior to addition of 0.5 mM GTP (freshly thawed). Tubulin polymerisation rates were measured for 1h by means of turbidity at 340 nm in a plate reader (Perkin Elmer).

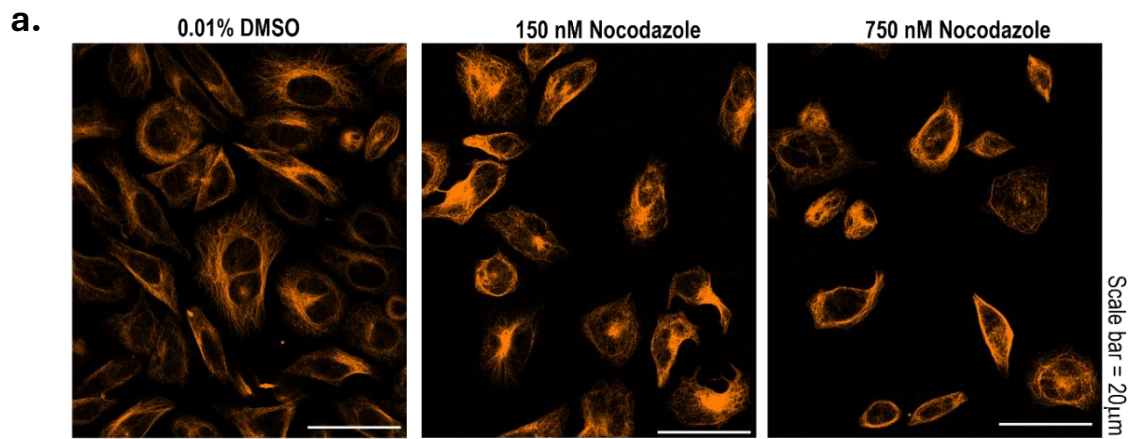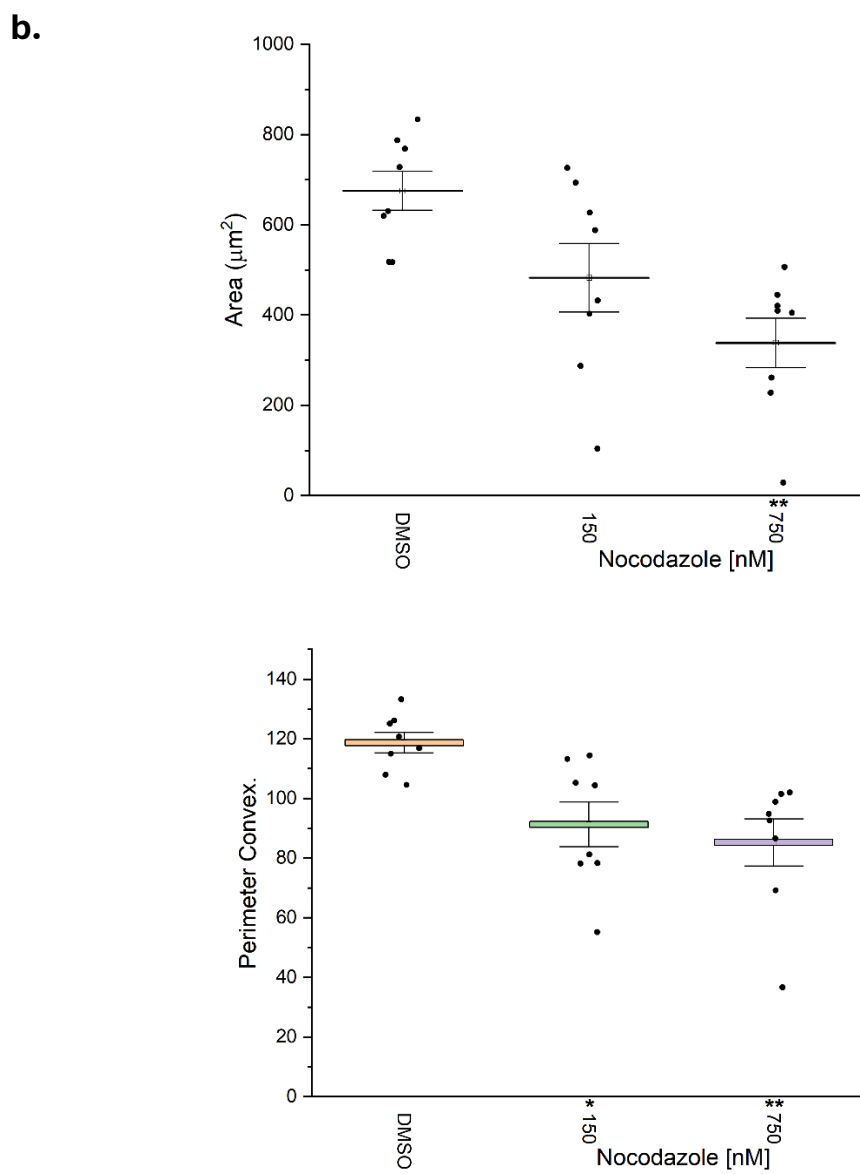

**Supplementary Figure 7** Microtubule analysis of live HeLa monolayers under chemical perturbation with nocodazole.

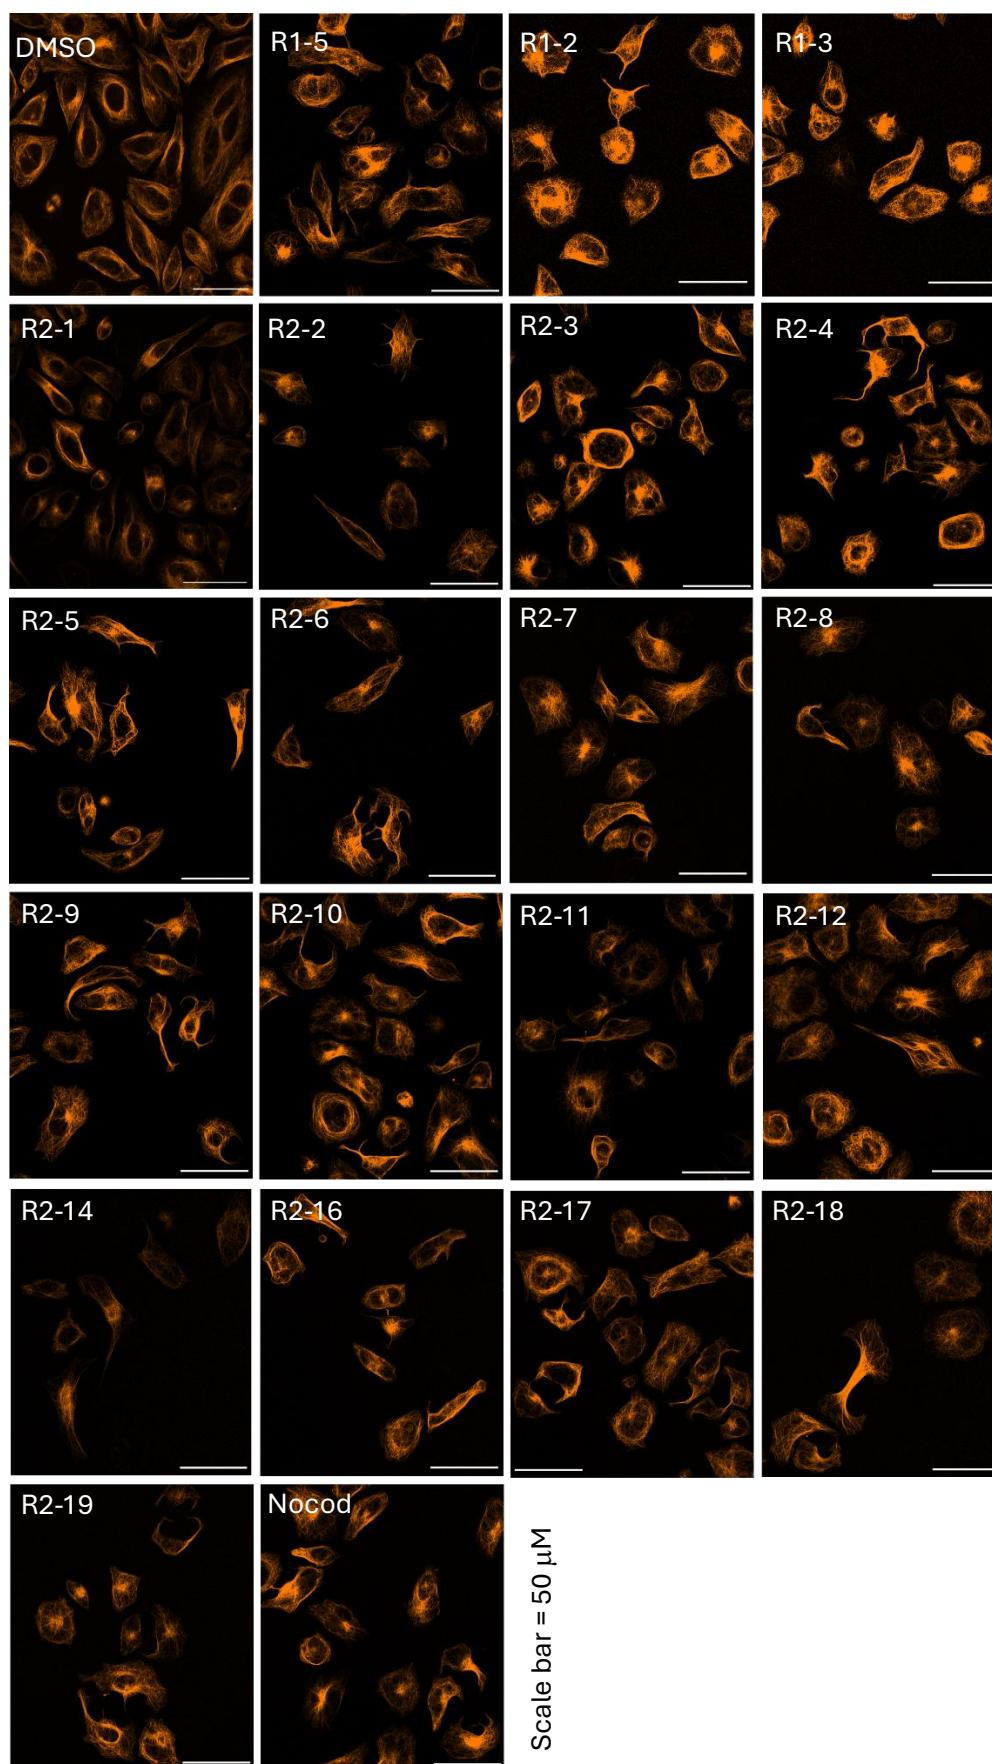

**Supplementary Figure 8** Fluorescence microscopy of MT responses on HeLa cells upon treatment with our full set of tubulin hit compounds (750 nM x 24h)

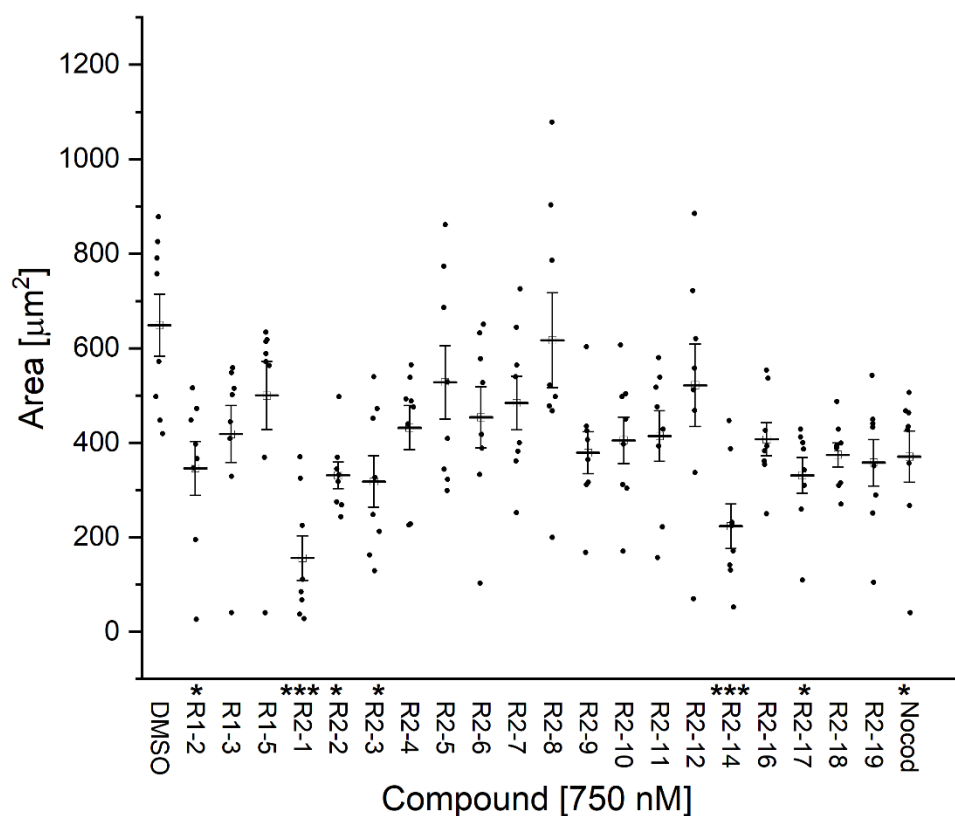

**Supplementary Figure 9** Comparison of area measurements for tubulin hit compounds identified in this study. Dots represent median values obtained for each field analysed ( $n = 4$ ) in duplicate wells. The scatter plot shows the combined median values ( $n = 8$ ), while boxes depict mean values per well  $\pm$  standard error. Statistical significance was assessed using a one-way ANOVA followed by Tukey's post hoc test, with significance levels indicated by asterisks (\* $P < 0.05$ , \*\* $P < 0.01$ , \*\*\* $P < 0.001$ ). All compounds were tested at an equal concentration, and the DMSO control was maintained at 0.05% (v/v).

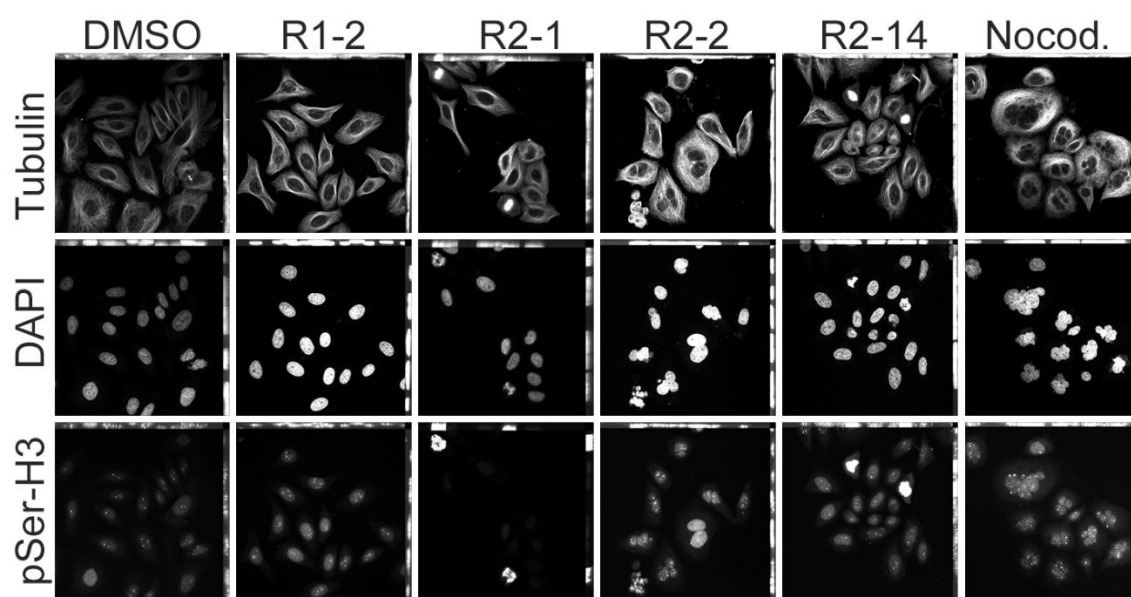

**Supplementary Figure 10** Immunofluorescence microscopy images from HeLa cells treated with the tubulin hit compounds. Z-stack sections were processed using the maximum intensity projection option after imaging under the FITC (Tubulin), UV (DAPI) and AF555 (pSer-H3) detectors. Channel images were split as indicated and the top and right borders show the orthogonal views. The merged projection and scale bars are the same as presented in Figure 6C.



## B. First Discovery Round - Summary and Outcomes

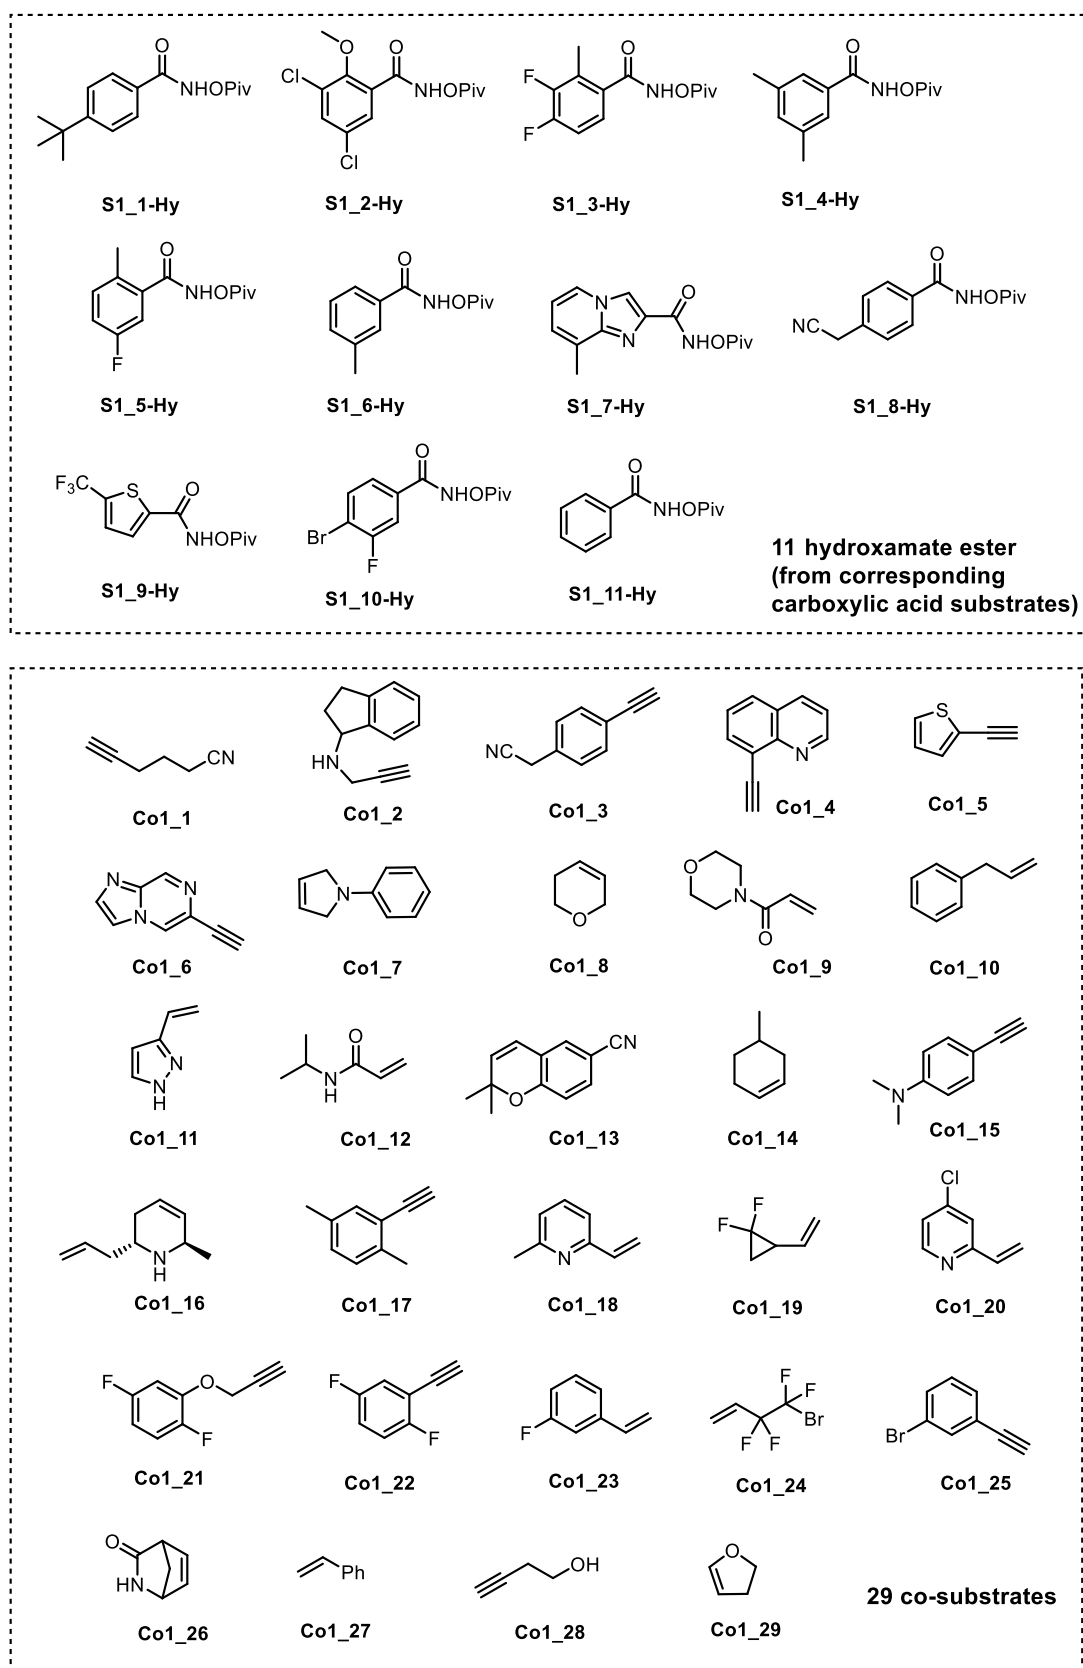

**Supplementary Figure 11** Structures of unique substrates and co-substrates selected for the first round of discovery

**Supplementary Table 12** First round reactions selected for purification and further evaluation.  
U = unidentified by <sup>1</sup>H NMR.

| Synthesis ID | Combination       | Target MW | μmol pdt 1 | μmol pdt 2 | Total isolated yield (%) | Active pdt?      | Validated ? |
|--------------|-------------------|-----------|------------|------------|--------------------------|------------------|-------------|
| SG-7-41-A1   | S1_1-Hy + Co1_1   | 268       | 16.4       | -          | 55                       |                  |             |
| SG-7-41-A6   | S1_1-Hy + Co1_23  | 297       | 17.3       | -          | 58                       |                  |             |
| SG-7-41-A7   | S1_2-Hy + Co1_1   | 310       | 16.5       | 10.3       | 89                       |                  |             |
| SG-7-41-A11  | S1_2-Hy + Co1_9   | 358       | 11.2       | -          | 37                       |                  |             |
| SG-7-41-B3   | S1_2-Hy + Co1_18  | 336       | 3.6        | -          | 12                       |                  |             |
| SG-7-41-B7   | S1_3-Hy + Co1_1   | 262       | 5.0        | 0.4        | 18                       |                  |             |
| SG-7-41-B10  | S1_3-Hy + Co1_9   | 310       | 12.0       | 0.3        | 41                       |                  |             |
| SG-7-41-C3   | S1_3-Hy + Co1_23  | 291       | 5.2        | 1.4        | 22                       |                  |             |
| SG-7-41-C5   | S1_4-Hy + Co1_2   | 318       | 5.0        | -          | 17                       |                  |             |
| SG-7-41-C10  | S1_4-Hy + Co1_24  | 353       | 2.3        | -          | 8                        |                  |             |
| SG-7-41-C11  | S1_5-Hy + Co1_3   | 292       | 2.1        | -          | 7                        | Y, U, other      |             |
| SG-7-41-D3   | S1_5-Hy + Co1_12  | 447       | 7.8        | -          | 26                       |                  |             |
| SG-7-41-D5   | S1_6-Hy + Co1_10  | 251       | 19.9       | -          | 66                       |                  |             |
| SG-7-41-D6   | S1_6-Hy + Co1_15  | 278       | 10.8       | -          | 36                       |                  |             |
| SG-7-41-D7   | S1_6-Hy + Co1_18  | 252       | 19.5       | -          | 65                       |                  |             |
| SG-7-41-D8   | S1_7-Hy + Co1_1   | 266       | 7.1        | -          | 24                       |                  |             |
| SG-7-41-E10  | S1_8-Hy + Co1_17  | 288       | 13.2       | -          | 44                       | Y, R1-1, tubulin | Y           |
| SG-7-41-E11  | S1_8-Hy + Co1_25  | 338       | 0.3        | -          | 1                        |                  |             |
| SG-7-41-E12  | S1_9-Hy + Co1_1   | 286       | 13.6       | -          | 45                       |                  |             |
| SG-7-41-F7   | S1_9-Hy + Co1_9   | 334       | 2.1        | -          | 7                        |                  |             |
| SG-7-41-F12  | S1_9-Hy + Co1_18  | 312       | 4.8        | -          | 16                       |                  |             |
| SG-7-41-G3   | S1_9-Hy + Co1_21  | 361       | 8.9        | -          | 30                       | Y, R1-3, tubulin | Y           |
| SG-7-41-G4   | S1_9-Hy + Co1_23  | 315       | 8.3        | 0.6        | 30                       |                  |             |
| SG-7-41-G6   | S1_10-Hy + Co1_10 | 333       | 8.4        | -          | 28                       |                  |             |
| SG-7-41-G8   | S1_10-Hy + Co1_17 | 345       | 1.5        | -          | 5                        | Y, R1-2, tubulin | Y           |
| SG-7-41-G9   | S1_11-Hy + Co1_26 | 228       | 16.2       | -          | 54                       |                  |             |
| SG-7-41-G10  | S1_11-Hy + Co1_27 | 223       | 16.1       | -          | 54                       | Y, R1-4, tubulin | Y           |
| SG-7-41-G11  | S1_11-Hy + Co1_28 | 189       | 15.3       | 0.5        | 51                       |                  |             |
| SG-7-41-G12  | S1_11-Hy + Co1_29 | 189       | 16.4       | -          | 55                       |                  |             |

**Supplementary Table 13** Reagents added to the initial combination subset based on hits identified in the first round of discovery.

| Reagent                                                                             | Additional reagent added                                                            | Selection Method <sup>a</sup> |
|-------------------------------------------------------------------------------------|-------------------------------------------------------------------------------------|-------------------------------|
| 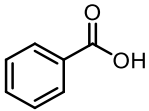   |    | Same cluster                  |
|    |    | Same cluster                  |
|    |    | Same cluster                  |
|    |    | Same cluster                  |
|    |    | Nearest Jaccard               |
|   |   | Same cluster                  |
|  |  | Same cluster                  |
|  |  | Nearest Jaccard               |
|  |  | Nearest Jaccard               |

<sup>a</sup> Reagents were added by selecting either the next most cost-effective compound within each cluster or the nearest neighbour by Jaccard distance in case of singleton clusters. After each addition, all pairwise combinations were recalculated to give the updated subset.

## C. Subsequent Discovery Round - Summary and Outcomes

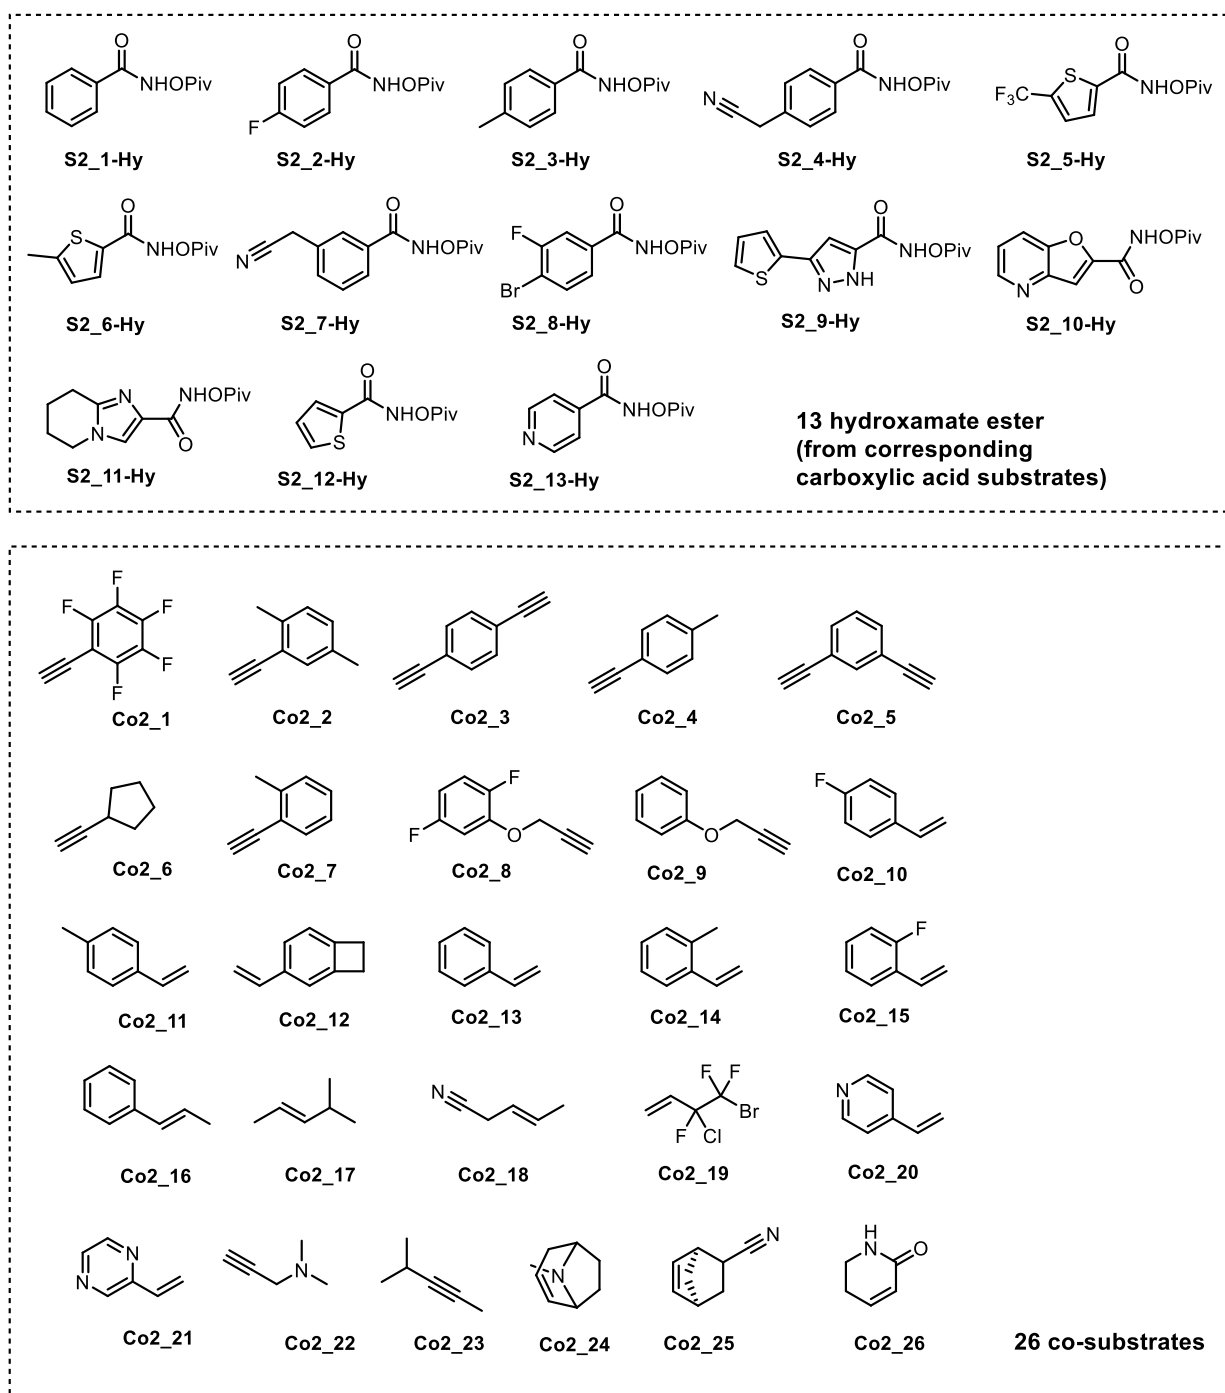

**Supplementary Figure 12** Structures of unique substrates and co-substrates selected for the second round of discovery

**Supplementary Table 14** Reactions selected for purification and further evaluation in the second discovery round. U = unidentified by <sup>1</sup>H NMR.

| Synthesis ID | Combination      | Target MW 1 | Target MW 2 | μmol products        | Total isolated yield (%) | Active product? | Cluster         |
|--------------|------------------|-------------|-------------|----------------------|--------------------------|-----------------|-----------------|
| RHA3_RP1_A1  | S2_1-Hy + Co2_11 | 238         |             | [23.9, 5.5]          | 98                       |                 |                 |
| RHA3_RP1_A3  | S2_1-Hy + Co2_14 | 238         |             | 18.1                 | 60                       |                 |                 |
| RHA3_RP1_A4  | S2_1-Hy + Co2_20 | 225         | 327         | [3.6, 2.1]           | 19                       |                 |                 |
| RHA3_RP1_A5  | S2_1-Hy + Co2_4  | 236         |             | 3.0                  | 10                       | Y, R2-1         | Tubulin         |
| RHA3_RP1_A6  | S2_1-Hy + Co2_12 | 250         |             | [1.6, 0.8]           | 8                        | Y, R2-2         | Tubulin         |
| RHA3_RP1_A8  | S2_1-Hy + Co2_7  | 250         | 236         | [16.4, 2.5, 2.4]     | 71                       | Y, R2-3         | Tubulin + other |
| RHA3_RP1_A9  | S2_1-Hy + Co2_5  | 246         |             | 3.3                  | 11                       | Y, U            | Tubulin         |
| RHA3_RP1_A11 | S2_2-Hy + Co2_4  | 254         |             | 8.7                  | 29                       | Y, R2-4         | Tubulin         |
| RHA3_RP1_A12 | S2_2-Hy + Co2_7  | 254         |             | 12.2                 | 41                       | Y, R2-5         | Tubulin         |
| RHA3_RP1_B1  | S2_2-Hy + Co2_15 | 260         |             | [14.6, 5.8]          | 68                       | Y, R2-6         | Tubulin         |
| RHA3_RP1_B2  | S2_3-Hy + Co2_13 | 238         |             | [13.4, 7.1]          | 68                       | Y, R2-7         | Tubulin         |
| RHA3_RP1_B3  | S2_3-Hy + Co2_16 | 252         |             | 4.0                  | 13                       |                 |                 |
| RHA3_RP1_B4  | S2_3-Hy + Co2_4  | 281         | 250         | [5.0, 4.4, 3.6, 0.8] | 46                       | Y, R2-8, R2-9   | Tubulin + other |
| RHA3_RP1_B6  | S2_3-Hy + Co2_8  | 302         |             | 10.6                 | 35                       |                 |                 |
| RHA3_RP1_B7  | S2_3-Hy + Co2_2  | 266         |             | 1.9                  | 6                        | Y, U            | Tubulin + other |
| RHA3_RP1_B8  | S2_4-Hy + Co2_11 | 277         |             | [22.0, 1.8]          | 79                       |                 |                 |
| RHA3_RP1_B9  | S2_4-Hy + Co2_13 | 263         |             | [12.9, 9.9]          | 76                       | Y, R2-10        | Tubulin         |
| RHA3_RP1_B12 | S2_4-Hy + Co2_4  | 275         | 294         | [3.3, 0.3]           | 12                       | Y, R2-11        | Tubulin         |
| RHA3_RP1_C1  | S2_4-Hy + Co2_9  | 291         | 310         | [0.7, 0.7, 0.7, 0.6] | 9                        |                 |                 |
| RHA3_RP1_C2  | S2_4-Hy + Co2_7  | 275         | 294         | [2.2, 1.7, 1.1, 0.7] | 19                       | Y, R2-12        | Tubulin         |
| RHA3_RP1_C4  | S2_4-Hy + Co2_22 | 242         |             | 5.4                  | 18                       |                 |                 |
| RHA3_RP1_C5  | S2_5-Hy + Co2_13 | 462         |             | 6.7                  | 22                       | Y, S2_5         | Other           |

|              |                   |     |     |                                                |     |          |         |
|--------------|-------------------|-----|-----|------------------------------------------------|-----|----------|---------|
| RHA3_RP1_C6  | S2_5-Hy + Co2_3   | 296 |     | 13.5                                           | 45  | Y, S2_5  | Other   |
| RHA3_RP1_C7  | S2_5-Hy + Co2_7   | 310 |     | 14.5                                           | 48  | Y, R2-13 | Tubulin |
| RHA3_RP1_C8  | S2_5-Hy + Co2_5   | 320 |     | 12.8                                           | 43  | Y, S2_5  | Other   |
| RHA3_RP1_C9  | S2_5-Hy + Co2_15  | 316 |     | [16.8, 3.8]                                    | 69  | Y, S2_5  | Other   |
| RHA3_RP1_C11 | S2_6-Hy + Co2_11  | 258 |     | [0.4, 0.4]                                     | 3   | Y, R2-14 | Tubulin |
| RHA3_RP1_C12 | S2_6-Hy + Co2_13  | 244 |     | [6.1, 0.4]                                     | 22  | Y, R2-15 | Tubulin |
| RHA3_RP1_D2  | S2_7-Hy + Co2_13  | 263 |     | 26.2                                           | 75  | Y, R2-16 | Tubulin |
| RHA3_RP1_D4  | S2_7-Hy + Co2_7   | 275 |     | 3.3                                            | 11  | Y, R1-17 | Tubulin |
| RHA3_RP1_D5  | S2_7-Hy + Co2_8   | 328 |     | 0.3                                            | 1   |          |         |
| RHA3_RP1_D6  | S2_7-Hy + Co2_2   | 291 |     | [1.0, 0.7]                                     | 6   | Y, R2-18 | Tubulin |
| RHA3_RP1_D7  | S2_7-Hy + Co2_23  | 242 | 302 | [9.9, 0.7, 0.4, 0.3]                           | 38  | Y, S2_7  | Other   |
| RHA3_RP1_D8  | S2_7-Hy + Co2_25  | 279 |     | 5.4                                            | 18  |          |         |
| RHA3_RP1_D9  | S2_7-Hy + Co2_21  | 279 | 261 | [5.4, 4.6, 1.9, 0.4]                           | 41  |          |         |
| RHA3_RP1_D10 | S2_7-Hy + Co2_26  | 279 | 302 | [6.5, 4.3, 0.3, 0.3]                           | 37  |          |         |
| RHA3_RP1_D11 | S2_7-Hy + Co2_6   | 253 |     | [11.4, 3.6, 2.4, 1.6, 1.2, 0.8, 0.8, 0.8, 0.4] | 77  | Y, R2-O1 | Other   |
| RHA3_RP1_E1  | S2_8-Hy + Co2_10  | 340 |     | [3.5, 0.3]                                     | 13  | Y, R2-O2 | Other   |
| RHA3_RP1_E2  | S2_8-Hy + Co2_7   | 334 |     | 1.5                                            | 5   | Y, R2-19 | Tubulin |
| RHA3_RP1_E5  | S2_9-Hy + Co2_26  | 294 |     | 30.0                                           | 100 | Y, S2_9  | Other   |
| RHA3_RP1_E8  | S2_10-Hy + Co2_6  | 263 |     | 8.7                                            | 29  |          |         |
| RHA3_RP1_E11 | S2_12-Hy + Co2_23 | 228 | 208 | [1.0, 0.9]                                     | 6   | Y, S2_12 | Other   |
| RHA3_RP1_E12 | S2_12-Hy + Co2_25 | 245 |     | [11.8, 1.2]                                    | 43  |          |         |
| RHA3_RP1_F1  | S2_4-Hy + Co2_10  | 281 |     | 22.1                                           | 74  |          |         |
| RHA3_RP1_F10 | S2_13-Hy + Co2_11 | 223 |     | 14.8                                           | 49  |          |         |

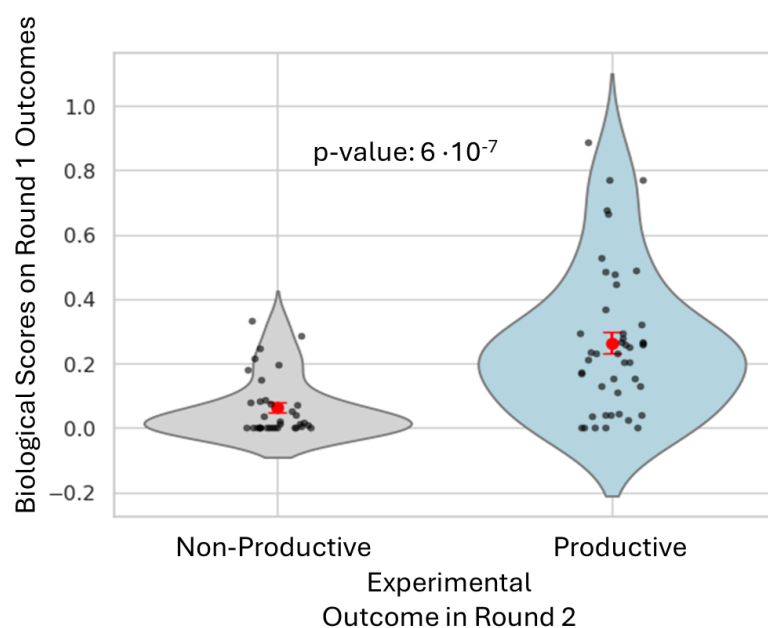

**Supplementary Figure 13** Violin plots showing the distribution of biological scores based on similarity to round 1 hits for combinations that corresponded to productive or non-productive reactions in round 2. Each dot represents an individual compound, and red bars indicate the mean  $\pm$  standard error. The difference between groups was statistically significant (independent two-sample t-test,  $p = 6 \times 10^{-7}$ ).

## D. Synthetic Procedures

### O-pivaloylhydroxylamine triflate salt (SI-1)

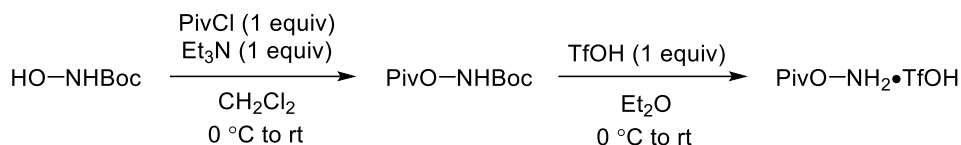

Adapting a procedure from Org. Synth. **2020**, 97, 207–216.

To a solution of N-Boc-hydroxylamine (3.00 g, 22.5 mmol) and Et<sub>3</sub>N (3.13 mL, 22.5 mmol) in DCM (40 mL) at 0 °C was added trimethylacetyl chloride (2.80 mL, 22.5 mmol) over 5 mins. The mixture was stirred for 30 mins before warming to room temperature and stirring for a further 2 h. The solids were removed by filtration, and the filtrate was washed with water (50 mL), sat. aq. NaHCO<sub>3</sub> (50 mL) and brine (50 mL), dried (Na<sub>2</sub>SO<sub>4</sub>), filtered and concentrated in vacuo to give PivO-NHBoc as a colourless solid (4.34 g, 89%). <sup>1</sup>H NMR (400 MHz, CD<sub>3</sub>OD) δ 1.47 (s, 9 H, Boc CH<sub>3</sub>), 1.27 (s, 9 H, Piv CH<sub>3</sub>); <sup>13</sup>C NMR (126 MHz, CDCl<sub>3</sub>) δ 178.0 (Piv C=O), 155.8 (amide C=O), 83.2 (Boc C), 38.3 (Piv C), 28.2 (Boc CH<sub>3</sub>), 27.1 (Piv CH<sub>3</sub>);

To a solution of PivO-NHBoc (3.00 g, 13.8 mmol) in Et<sub>2</sub>O (30 mL) at 0 °C was added trifluoromethanesulfonic acid (1.22 mL, 13.8 mmol) over 5 mins. The mixture was stirred for 30 mins before warming to room temperature and stirring for a further 3 h. Petroleum ether (40:60, 20 mL) was added, and the mixture was filtered. The solids were washed with petroleum ether (40:60, 3 x 10 mL) and ice-cooled CH<sub>2</sub>Cl<sub>2</sub> (3 x 5 mL), giving PivO-NH<sub>2</sub>•TfOH as a colourless solid (2.71 g, 74%). <sup>1</sup>H NMR (400 MHz, CD<sub>3</sub>OD) δ 1.33 (s, 9 H, Piv CH<sub>3</sub>); <sup>13</sup>C NMR (126 MHz, CD<sub>3</sub>OD) δ 175.8 (Piv C=O), 121.8 (q, J<sub>CF</sub> = 318.4 Hz, CF<sub>3</sub>), 39.5 (Piv C), 27.0 (Piv CH<sub>3</sub>);

### 1. Synthesis of hydroxamate esters from carboxylic acids

#### General Procedure A

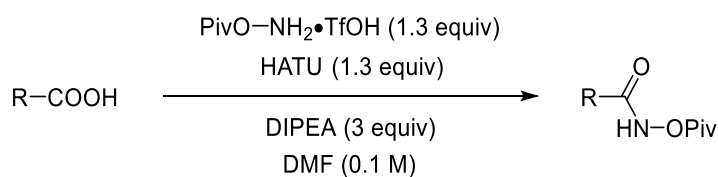

To a solution of O-Pivaloyl hydroxylamine triflate salt (1.3 equiv) in DMF (1 mL) was added DIPEA (1.0 equiv). The mixture was stirred for 1 h at room temperature. Separately, DIPEA (2.0 equiv) was added to a solution of carboxylic acid (1.0 equiv) and HATU (1.3 equiv) in DMF (7.5 mL) at room temperature. The O-Pivaloyl hydroxylamine solution was added dropwise, and the mixture was stirred for 2 h at room temperature. The mixture was diluted with EtOAc (30 mL), and the organics were washed with water (30 mL), sat. aq. LiCl (3 x 30 mL) and sat. aq. NaCl (30 mL), dried (MgSO<sub>4</sub>), then filtered and concentrated *in vacuo*. The crude residue was purified by column chromatography under the specified conditions to give the corresponding hydroxamate ester.



**Note:** For water-soluble substrates, the aqueous wash was avoided, with the DMF removed under reduced pressure or under a stream of  $N_2$  overnight, followed by purification of the resulting crude residue.

#### 4-(tert-Butyl)-N-(pivaloyloxy)benzamide (S1\_1-Hy)

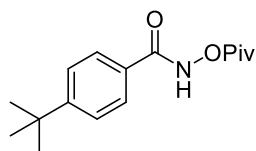

Following **General Procedure A** using 4-*tert*-butylbenzoic acid (100 mg, 0.56 mmol). The crude material was purified by column chromatography (10% EtOAc in hexane) to give hydroxamate ester **S-2** as a colourless oil that solidified on standing (104 mg, 67%).  $^1\text{H}$  NMR (500 MHz,  $\text{CD}_3\text{OD}$ )  $\delta$  7.80 (m, 2 H, 2-H and 6-H), 7.55–7.49 (m, 2 H, 3-H and 5-H), 1.35 (s, 9 H, Piv  $\text{CH}_3$ ), 1.34 (s, 9 H, Ar-*t*Bu  $\text{CH}_3$ );  $^{13}\text{C}$  NMR (126 MHz,  $\text{CD}_3\text{OD}$ )  $\delta$  177.5 (Piv C=O), 167.9 (amide C=O), 157.2 (C-4), 129.6 (C-1), 128.4 (C-2 and C-6), 126.7 (C-3 and C-5), 39.4 (Piv C), 35.9 (Ar-*t*Bu C), 31.5 (Piv  $\text{CH}_3$ ), 27.5 (Ar-*t*Bu  $\text{CH}_3$ ); HRMS (ESI)  $m/z$  Calculated for  $\text{C}_{16}\text{H}_{23}\text{NO}_3\text{Na}$   $[\text{M}+\text{Na}]^+$  300.1570; Found 300.1573.

#### 3,5-Dichloro-2-methoxy-N-(pivaloyloxy)benzamide (S1\_2-Hy)

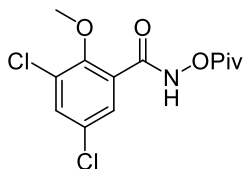

Following **General Procedure A** with 3,5-dichloro-2-methoxybenzoic acid (247 mg, 1.12 mmol). The crude material was purified by column chromatography (10% EtOAc in hexane) to give hydroxamate ester **S-3** as a colourless oil (280 mg, 78%).  $^1\text{H}$  NMR (500 MHz,  $\text{CD}_3\text{OD}$ )  $\delta$  7.68 (d,  $J$  = 2.6 Hz, 1 H, 6-H), 7.61 (d,  $J$  = 2.6 Hz, 1 H, 4-H), 3.94 (s, 3 H,  $\text{OCH}_3$ ), 1.35 (s, 9 H, Piv  $\text{CH}_3$ );  $^{13}\text{C}$  NMR (126 MHz,  $\text{CD}_3\text{OD}$ )

$\delta$  175.8 (Piv C=O), 162.4 (amide C=O), 153.1 (C-2), 132.7 (C-4), 129.5 (C-3), 129.4 (C-5), 128.8 (C-1), 128.3 (C-6), 61.7 ( $\text{OCH}_3$ ), 38.0 (Piv C), 26.1 (Piv  $\text{CH}_3$ ); HRMS (ESI)  $m/z$  Calculated for  $\text{C}_{13}\text{H}_{15}\text{Cl}_2\text{NO}_4\text{Na}$   $[\text{M}+\text{Na}]^+$  342.0270; Found 342.0268.

#### 3,4-Difluoro-2-methyl-N-(pivaloyloxy)benzamide (S1\_3-Hy)

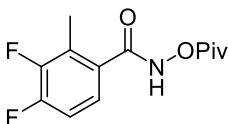

Following **General Procedure A** with 3,4-difluoro-2-methylbenzoic acid (97 mg, 0.56 mmol). The crude material was purified by column chromatography (20% EtOAc in hexane) to give hydroxamate ester **S-4** as a colourless solid (100 mg, 66%).  $^1\text{H}$  NMR (500 MHz,  $\text{CD}_3\text{OD}$ )  $\delta$  7.36–7.25 (m, 1 H, 6-H), 7.24–7.13 (m, 1 H, 5-H), 2.40 (d,  $J$  = 2.4 Hz, 3 H,  $\text{CH}_3$ ), 1.35 (s, 9 H, Piv  $\text{CH}_3$ );  $^{13}\text{C}$  NMR (126 MHz,  $\text{CD}_3\text{OD}$ )  $\delta$  175.9 (Piv C=O), 167.5 (amide C=O), 153.1 (dd,  $J_{\text{CF}}$  = 250.8, 13.8 Hz, C-4), 150.5 (dd,  $J_{\text{CF}}$  = 245.8, 12.8 Hz, C-3), 131.6 (t,  $J_{\text{CF}}$  = 3.0 Hz, C-1), 128.4 (d,  $J_{\text{CF}}$  = 14.8 Hz, C-2), 125.1 (dd,  $J_{\text{CF}}$  = 7.6, 4.6 Hz, C-6), 115.6 (d,  $J_{\text{CF}}$  = 18.0 Hz, C-5), 39.4 (Piv C), 27.4 (Piv  $\text{CH}_3$ ), 11.6 (dd,  $J_{\text{CF}}$  = 4.8, 2.3 Hz,  $\text{CH}_3$ );  $^{19}\text{F}$  NMR (471 MHz,  $\text{CD}_3\text{OD}$ )  $\delta$  –

136.7–136.9 (m), –142.4 –142.6 (br d,  $J$  = 18.8 Hz); HRMS (ESI)  $m/z$  Calculated for  $\text{C}_{13}\text{H}_{15}\text{F}_2\text{NO}_3\text{Na}$   $[\text{M}+\text{Na}]^+$  294.0912; Found 294.0913.

#### 3,5-Dimethyl-N-(pivaloyloxy)benzamide (S1\_4-Hy)

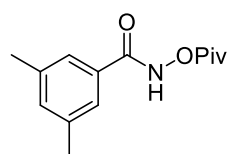

Following **General Procedure A** with 3,5-dimethylbenzoic acid (84 mg, 0.56 mmol). The crude material was purified by column chromatography (20% EtOAc in hexane) to give hydroxamate ester **S-5** as a colourless solid (99 mg, 71%).  $^1\text{H}$  NMR (500 MHz,  $\text{CD}_3\text{OD}$ )  $\delta$  7.42 (br s, 2 H, 2-H and 6-H), 7.24 (s, 1 H, 4-H), 2.36 (br s, 6 H, 2  $\times$

$\text{CH}_3$ ), 1.34 (s, 9 H, Piv  $\text{CH}_3$ );  $^{13}\text{C}$  NMR (126 MHz,  $\text{CD}_3\text{OD}$ )  $\delta$  177.6 (Piv C=O), 168.3 (amide C=O), 139.7

(C-4), 134.9 (C-3 and C-5), 132.5 (C-1), 126.2 (C-2 and C-6), 39.4 (Piv C), 27.5 (Piv CH<sub>3</sub>), 21.2 (2 × CH<sub>3</sub>); HRMS (ESI) m/z Calculated for C<sub>14</sub>H<sub>19</sub>NO<sub>3</sub>Na [M+Na]<sup>+</sup> 272.1257; Found 272.1255.

#### 5-Fluoro-2-methyl-N-(pivaloyloxy)benzamide (S1\_5-Hy)

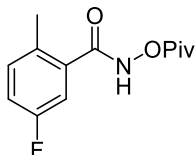

Following **General Procedure A** with 5-fluoro-2-methylbenzoic acid (87 mg, 0.56 mmol). The crude material was purified by column chromatography (10% EtOAc in hexane) to give hydroxamate ester **S-6** as a colourless solid (102 mg, 72%). <sup>1</sup>H NMR (500 MHz, CD<sub>3</sub>OD) δ 7.31 (dd, *J* = 8.4, 5.4 Hz, 1 H, 6-H), 7.23–7.18 (m, 1 H, 3-H), 7.15 (dd, *J* = 8.4, 2.7 Hz, 1 H, 4-H), 2.41 (s, 3 H, CH<sub>3</sub>), 1.35 (s, 9 H, Piv CH<sub>3</sub>); <sup>13</sup>C NMR (126 MHz, CD<sub>3</sub>OD) δ 177.3 (Piv C=O), 168.2 (amide C=O), 161.9 (d, *J*<sub>CF</sub> = 244.4 Hz, C-5), 135.3 (d, *J*<sub>CF</sub> = 6.6 Hz, C-1), 134.0 (d, *J*<sub>CF</sub> = 2.9 Hz, C-2), 133.8 (d, *J*<sub>CF</sub> = 7.6 Hz, C-3), 118.4 (d, *J*<sub>CF</sub> = 21.0 Hz, C-6), 115.5 (d, *J*<sub>CF</sub> = 23.4 Hz, C-4), 39.4 (Piv C), 27.5 (Piv CH<sub>3</sub>), 18.8 (CH<sub>3</sub>); <sup>19</sup>F{<sup>1</sup>H} NMR (471 MHz, CD<sub>3</sub>OD) δ –119.1 (s); HRMS (ESI) m/z Calculated for C<sub>13</sub>H<sub>16</sub>FNO<sub>3</sub>Na [M+Na]<sup>+</sup> 276.1006; Found 276.1006.

#### 3-Methyl-N-(pivaloyloxy)benzamide (S1\_6-Hy)

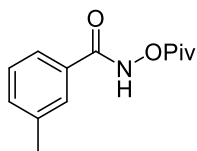

Following **General Procedure A** with 3-methylbenzoic acid (76 mg, 0.56 mmol). The crude material was purified by column chromatography (10% EtOAc in hexane) to give hydroxamate ester **S-7** as a colourless oil that solidified on standing (105 mg, 80%). <sup>1</sup>H NMR (500 MHz, CD<sub>3</sub>OD) δ 7.64 (s, 1 H, 2-H), 7.60 (d, *J* = 7.6 Hz, 1 H, 6-H), 7.41 (d, *J* = 7.6 Hz, 1 H, 4-H), 7.37 (t, *J* = 7.6 Hz, 1 H, 3-H), 2.41 (s, 3 H, CH<sub>3</sub>), 1.35 (s, 9 H, Piv CH<sub>3</sub>); <sup>13</sup>C NMR (126 MHz, CD<sub>3</sub>OD) δ 177.6 (Piv C=O), 168.2 (amide C=O), 139.0 (C-5), 134.2 (C-4), 132.5 (C-1), 129.7 (C-6), 129.0 (C-2), 125.6 (C-3), 39.4 (Piv C), 27.5 (Piv CH<sub>3</sub>), 21.3 (CH<sub>3</sub>); HRMS (ESI) m/z Calculated for C<sub>13</sub>H<sub>17</sub>FNO<sub>3</sub>Na [M+Na]<sup>+</sup> 258.1101; Found 258.1100.

#### 8-Methyl-N-(pivaloyloxy)imidazo[1,2-a]pyridine-2-carboxamide (S1\_7-Hy)

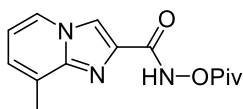

Following **General Procedure A** with 8-methylimidazo[1,2-a]pyridine-2-carboxylic acid (99 mg, 0.56 mmol). The crude material was purified by column chromatography (5% MeOH in CH<sub>2</sub>Cl<sub>2</sub>) to give hydroxamate ester **S-8** as a colourless solid (79 mg, 51% yield). <sup>1</sup>H NMR (500 MHz, CD<sub>3</sub>OD) δ 8.30 (s, 1 H, 5-H), 8.28 (d, *J* = 6.8 Hz, 1 H, 3-H), 7.15–7.11 (m, 1 H, 7-H), 6.85 (t, *J* = 6.8 Hz, 1 H, 6-H), 2.55 (s, 3 H, CH<sub>3</sub>), 1.36 (s, 9 H, Piv CH<sub>3</sub>); <sup>13</sup>C NMR (126 MHz, CD<sub>3</sub>OD) δ 177.4 (Piv C=O), 163.0 (amide C=O), 146.9 (C-8a), 137.3 (C-8), 129.0 (C-2), 126.6 (C-5), 126.2 (C-7), 117.3 (C-3), 115.0 (C-6), 39.4 (Piv C), 27.5 (Piv CH<sub>3</sub>), 17.0 (CH<sub>3</sub>); HRMS (ESI) m/z Calculated for C<sub>14</sub>H<sub>18</sub>N<sub>3</sub>O<sub>3</sub>Na [M+Na]<sup>+</sup> 276.1343; Found 276.1345.

#### 4-(Cyanomethyl)-N-(pivaloyloxy)benzamide (S1\_8-Hy, S2\_4-Hy)

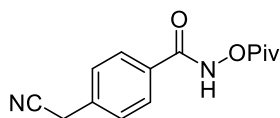

Following **General Procedure A** using 4-(cyanomethyl)benzoic acid (90 mg, 0.56 mmol). The crude material was purified by column chromatography (40% EtOAc in hexane) to give hydroxamate ester **S-9** as a colourless solid (70 mg, 48%). <sup>1</sup>H NMR (500 MHz, CD<sub>3</sub>OD) δ 7.85 (d, *J* = 8.4 Hz, 2 H, 2-H and 6-H), 7.51 (br d, *J* = 8.4 Hz, 2 H, 3-H and 5-H), 4.01 (s, 2 H, CH<sub>2</sub>CN), 1.35 (s, 9 H, Piv CH<sub>3</sub>); <sup>13</sup>C NMR (126 MHz, CD<sub>3</sub>OD) δ 177.5 (Piv C=O), 167.3 (amide

C=O), 137.1 (C-4), 132.2 (C-1), 129.5 (C-2 and C-6), 129.3 (C-3 and C-5), 119.0 (CN), 39.4 (Piv C), 27.5 (Piv CH<sub>3</sub>), 23.5 (CH<sub>2</sub>); HRMS (ESI) m/z Calculated for C<sub>14</sub>H<sub>16</sub>N<sub>2</sub>NaO<sub>3</sub> [M+Na]<sup>+</sup> 283.1053; Found 283.1050..

#### N-(pivaloyloxy)-5-(trifluoromethyl)thiophene-2-carboxamide (S1\_9-Hy and S2\_5-Hy)

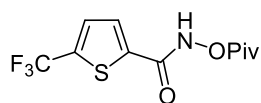

Following **General Procedure A** using 5-(trifluoromethyl)thiophene-2-carboxylic acid (219 mg, 1.12 mmol). The crude material was purified by column chromatography (25% EtOAc in hexane) to give hydroxamate ester **S-10** as a yellow solid (228 mg, 69%). <sup>1</sup>H NMR (500 MHz, CD<sub>3</sub>OD) δ 7.70–7.66 (m, 1 H, 3-H), 7.62–7.59 (m, 1 H, 4-H), 1.34 (s, 9 H, Piv CH<sub>3</sub>); <sup>13</sup>C NMR (126 MHz, CD<sub>3</sub>OD) δ 177.3 (Piv C=O), 161.0 (amide C=O), 140.4 (C-2), 136.4 (q, *J*<sub>CF</sub> = 38.5 Hz, C-5), 130.8 (q, *J*<sub>CF</sub> = 3.7 Hz, C-4), 130.0 (C-3), 123.5 (q, *J*<sub>CF</sub> = 268.7 Hz, CF<sub>3</sub>), 39.4 (Piv C), 27.4 (Piv CH<sub>3</sub>); <sup>19</sup>F{<sup>1</sup>H} NMR (376 MHz, CD<sub>3</sub>OD) δ –57.6 (s); HRMS (ESI) m/z Calculated for C<sub>11</sub>H<sub>12</sub>F<sub>3</sub>NNaO<sub>3</sub>S [M+Na]<sup>+</sup> 318.0382; Found 318.0384.

#### 4-Bromo-3-fluoro-N-(pivaloyloxy)benzamide (S1\_10-Hy, S2\_8-Hy)

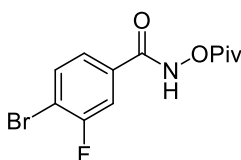

Following **General Procedure A** using 4-bromo-3-fluorobenzoic acid (123 mg, 0.56 mmol). The crude material was purified by column chromatography (15% EtOAc in hexane) to give hydroxamate ester **S-11** as a colourless solid (150 mg, 84%). <sup>1</sup>H NMR (500 MHz, CD<sub>3</sub>OD) δ 7.77 (dd, *J* = 8.3, 6.9 Hz, 1 H, 5-H), 7.64 (dd, *J* = 9.2, 1.9 Hz, 1 H, 6-H), 7.56 (dd, *J* = 8.3, 1.9 Hz, 1 H, 2-H), 1.34 (s, 9 H, Piv CH<sub>3</sub>); <sup>13</sup>C NMR (126 MHz, CD<sub>3</sub>OD) δ 177.4 (Piv C=O), 165.5 (amide C=O), 160.3 (d, *J*<sub>CF</sub> = 247.7 Hz, C-3), 135.4 (C-1), 134.1 (d, *J*<sub>CF</sub> = 6.4 Hz, C-5), 125.6 (d, *J*<sub>CF</sub> = 3.8 Hz, C-6), 116.5 (d, *J*<sub>CF</sub> = 24.5 Hz, C-2), 114.4 (d, *J*<sub>CF</sub> = 22.0 Hz, C-4), 39.4 (Piv C), 27.4 (Piv CH<sub>3</sub>); <sup>19</sup>F NMR (376 MHz, CD<sub>3</sub>OD) δ –107.8 (t); HRMS (ESI) m/z Calculated for C<sub>11</sub>H<sub>12</sub>BrFNO<sub>3</sub>Na [M+Na]<sup>+</sup> 339.9955 and 341.9935; Found 339.9944 and 341.9940.

#### N-(pivaloyloxy)benzamide (S1\_11-Hy, S2\_1-Hy)

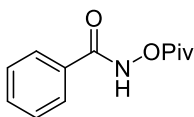

To a solution of PivO–NH<sub>2</sub>•TfOH (1.00 g, 3.75 mmol) in THF (17 mL) at 0 °C was added Et<sub>3</sub>N (949 μL, 6.82 mmol) and benzoyl chloride (396 μL, 3.41 mmol). The mixture was stirred for 2 h, then concentrated in vacuo. The residue was re-dissolved in EtOAc (40 mL) and organics were washed with sat. aq. NaHCO<sub>3</sub> (40 mL) and brine (40 mL), dried (MgSO<sub>4</sub>), filtered and concentrated in vacuo to give hydroxamate ester **S-1** as a colourless solid (648 mg, 86%). <sup>1</sup>H NMR (500 MHz, CDCl<sub>3</sub>) δ 9.40 (s, 1 H, NH), 7.84–7.79 (m, 2 H, 2-H and 6-H), 7.59–7.53 (m, 1 H, 4-H), 7.49–7.43 (m, 2 H, 3-H and 5-H), 1.36 (s, 9 H, Piv CH<sub>3</sub>); <sup>13</sup>C NMR (126 MHz, CDCl<sub>3</sub>) δ 177.2 (Piv C=O), 166.9 (amide C=O), 132.9 (C-4), 131.0 (C-1), 129.0 (C-2 and C-6), 127.6 (C-3 and C-5), 38.6 (Piv C), 27.2 (Piv CH<sub>3</sub>); HRMS (ESI) m/z Calculated for C<sub>12</sub>H<sub>16</sub>NO<sub>3</sub> [M+H]<sup>+</sup> 222.1125; Found 222.1125.

#### 4-Fluoro-N-(pivaloyloxy)benzamide (S2\_2-Hy)

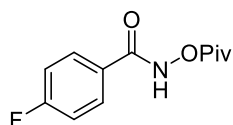

Following **General Procedure A** using 4-fluorobenzoic acid (280 mg, 2.00 mmol). The crude material was purified by column chromatography (20% EtOAc in hexane) to give hydroxamate ester **S-12** as a pale yellow solid (187 mg, 39%). <sup>1</sup>H NMR (400 MHz, CD<sub>3</sub>OD) δ 7.95–7.86 (m, 2 H, 2-H and 6-H), 7.30–7.20 (m, 2 H, 3-H and 5-H), 1.37 (s, 9 H, Piv CH<sub>3</sub>); <sup>13</sup>C NMR (101 MHz, CD<sub>3</sub>OD) δ 176.2 (Piv C=O), 165.5 (amide C=O), 165.3 (d, *J*<sub>CF</sub> = 247.7 Hz, C-4), 129.8

(d,  $J_{CF}$  = 9.0 Hz, C-2 and C-6), 127.6 (d,  $J_{CF}$  = 3.2 Hz, C-1), 115.4 (d,  $J_{CF}$  = 22.3 Hz, C-3 and C-5), 38.0 (Piv C), 26.1 (Piv CH<sub>3</sub>);  $^{19}\text{F}\{^1\text{H}\}$  NMR (376 MHz, CD<sub>3</sub>OD)  $\delta$  -109.04 (s); HRMS (ESI)  $m/z$  Calculated for C<sub>11</sub>H<sub>14</sub>FNO<sub>3</sub>Na [M+Na]<sup>+</sup> 262.0855; Found 262.0853.

#### 4-Methyl-N-(pivaloyloxy)benzamide (S2\_3-Hy)

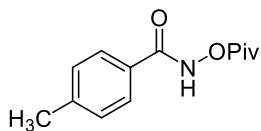

Following **General Procedure A** using 4-methylbenzoic acid (272 mg, 2.00 mmol). The crude material was purified by column chromatography (20% EtOAc in hexane) to give hydroxamate ester **S-13** as a white solid (131 mg, 25%).  $^1\text{H}$

NMR (400 MHz, CD<sub>3</sub>OD)  $\delta$  7.75–7.71 (m, 2 H, 2-H and 6-H), 7.35–7.29 (m, 2 H, 3-H and 5-H), 2.42 (s, 3 H, CH<sub>3</sub>), 1.36 (s, 9 H, Piv CH<sub>3</sub>);  $^{13}\text{C}$  NMR (101 MHz, CD<sub>3</sub>OD)  $\delta$  176.2 (Piv C=O), 166.7 (amide C=O), 143.0 (C-4), 129.0 (C-3 and C-5), 128.3 (C-1), 127.2 (C-2 and C-6), 38.0 (Piv C), 26.1 (Piv CH<sub>3</sub>), 20.2 (CH<sub>3</sub>); HRMS (ESI)  $m/z$  Calculated for C<sub>13</sub>H<sub>18</sub>NO<sub>3</sub> [M+H]<sup>+</sup> 236.1281; Found 236.1280.

#### 5-Methyl-N-(pivaloyloxy)thiophene-2-carboxamide (S2\_6-Hy)

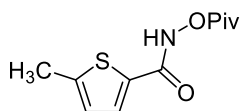

Following **General Procedure A** using 5-methylthiophene-2-carboxylic acid (284 mg, 2.00 mmol). The crude material was purified by column chromatography (20% EtOAc in hexane) to give hydroxamate ester **S-14** as a white solid (210 mg, 43%).

$^1\text{H}$  NMR (400 MHz, CDCl<sub>3</sub>)  $\delta$  9.17 (br s, 1 H, NH), 7.49 (d,  $J$  = 3.7 Hz, 1 H, 3-H), 6.84–6.75 (m, 1 H, 4-H), 2.54 (s, 3 H, CH<sub>3</sub>), 1.37 (s, 9 H, Piv CH<sub>3</sub>);  $^{13}\text{C}$  NMR (101 MHz, CDCl<sub>3</sub>)  $\delta$  177.2 (Piv C=O), 162.1 (amide C=O), 147.4 (C-5), 131.0 (C-2), 130.9 (C-3), 126.4 (C-4), 38.4 (Piv C), 27.0 (Piv CH<sub>3</sub>), 15.7 (aryl CH<sub>3</sub>); HRMS (ESI)  $m/z$  Calculated for C<sub>11</sub>H<sub>15</sub>NO<sub>3</sub>Na [M+Na]<sup>+</sup> 264.0665; Found 264.0663.

#### [3-(Cyanomethyl)phenyl]formamido 2,2-dimethylpropanoate (S2\_7-Hy)

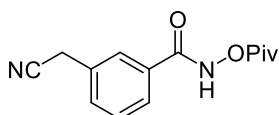

Following **General Procedure A** using 3-(cyanomethyl)benzoic acid (322 mg, 2.00 mmol). The crude material was purified by column chromatography (20% EtOAc in hexane) to give hydroxamate ester **S-15** as a white solid (166 mg,

32%).  $^1\text{H}$  NMR (400 MHz, CD<sub>3</sub>OD)  $\delta$  7.85 (d,  $J$  = 1.9 Hz, 1 H, 2-H), 7.80 (dt,  $J$  = 7.7, 1.6 Hz, 1 H, 6-H), 7.63 (ddt,  $J$  = 7.7, 1.9, 1.0 Hz, 1 H, 5-H), 7.55 (t,  $J$  = 7.7 Hz, 1 H, 4-H), 4.02 (s, 2 H, CH<sub>2</sub>CN), 1.37 (s, 9 H, Piv CH<sub>3</sub>);  $^{13}\text{C}$  NMR (101 MHz, CDCl<sub>3</sub>)  $\delta$  176.1 (Piv C=O), 165.9 (amide C=O), 132.2 (C-3), 132.0 (C-1), 131.6 (C-4), 129.2 (C-6), 126.9 (C-2), 126.5 (C-5), 117.8 (CN), 38.0 (Piv C), 26.1 (Piv CH<sub>3</sub>), 22.0 (CH<sub>2</sub>); HRMS (ESI)  $m/z$  Calculated for C<sub>14</sub>H<sub>16</sub>N<sub>2</sub>O<sub>3</sub>Na [M+Na]<sup>+</sup> 283.1053; Found 283.1055.

#### N-(pivaloyloxy)-5-(thiophen-2-yl)-1H-pyrazole-3-carboxamide (S2\_9-Hy)

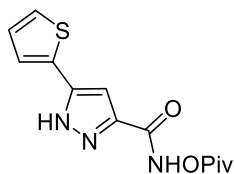

Following **General Procedure A** using 5-(thiophen-2-yl)-1H-pyrazole-3-carboxylic acid (194 mg, 1.00 mmol). The crude material was purified by column chromatography (20% EtOAc in hexane) to give hydroxamate ester **S-16** as an off-white solid (132 mg, 45%).  $^1\text{H}$  NMR (400 MHz, CDCl<sub>3</sub>)  $\delta$  7.37 (dd,  $J$  = 5.1, 1.2

Hz, 1 H, thiophenyl 5-H), 7.31 (dd,  $J$  = 3.7, 1.2 Hz, 1 H, thiophenyl 3-H), 7.10 (dd,  $J$  = 5.1, 3.6 Hz, 1 H, thiophenyl 4-H), 6.98 (s, 1 H, 4-H), 1.39 (s, 9 H, Piv CH<sub>3</sub>);  $^{13}\text{C}$  NMR (101 MHz, CD<sub>3</sub>OD)  $\delta$  176.1 (Piv C=O), 161.1 (amide C=O), 144.6 (C-3 pyrazole), 138.7 (C-2 thiophene), 130.4 (C-5 pyrazole),

127.6 (C-3 thiophene), 125.8 (C-5 thiophene), 124.8 (C-4 thiophene), 102.8 (C-4 pyrazole), 38.0 (Piv C), 26.0 (Piv CH<sub>3</sub>); HRMS (ESI) *m/z* Calculated for C<sub>13</sub>H<sub>16</sub>N<sub>3</sub>O<sub>3</sub>S [M+H]<sup>+</sup> 294.0907; Found 294.0904.

#### N-(pivaloyloxy)furo[3,2-b]pyridine-2-carboxamide (S2\_10-Hy)

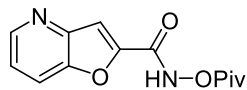

Following **General Procedure A** using furo[3,2-b]pyridine-2-carboxylic acid (250 mg, 1.53 mmol). The crude material was purified by column chromatography (40% EtOAc in hexane) to give hydroxamate ester **S-17** as a white solid (175 mg, 71%).

<sup>1</sup>H NMR (400 MHz, CD<sub>3</sub>OD) δ 8.62 (dt, *J* = 4.8, 1.2 Hz, 1 H, 5-H), 8.11–8.06 (m, 1 H, 7-H), 7.66 (d, *J* = 1.2 Hz, 1 H, 3-H), 7.54 (dd, *J* = 8.4, 4.7, 1.0 Hz, 1 H, 6-H), 1.38 (s, 9 H, Piv CH<sub>3</sub>); <sup>13</sup>C NMR (101 MHz, CD<sub>3</sub>OD) δ 175.7 (Piv C=O), 156.6 (amide C=O), 149.8 (C-2), 148.8 (C-7a), 147.0 (C-5), 145.6 (C-3a), 122.0 (C-6), 120.1 (C-7), 110.8 (C-3), 38.1 (Piv C), 26.1 (Piv CH<sub>3</sub>); HRMS (ESI) *m/z* Calculated for C<sub>13</sub>H<sub>15</sub>N<sub>2</sub>O<sub>4</sub> [M+H]<sup>+</sup> 263.1026; Found 263.1023.

#### N-(pivaloyloxy)-5,6,7,8-tetrahydroimidazo[1,2-a]pyridine-2-carboxamide (S2\_11-Hy)

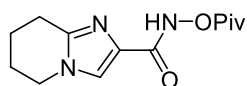

Following **General Procedure A** using 5,6,7,8-tetrahydroimidazo[1,2-a]pyridine-2-carboxylic acid (249 mg, 1.50 mmol). The crude mixture was purified by automated flash column chromatography (reverse-phase CombiFlash on a C18

column with ELS detection) using a gradient of 0–100% acetonitrile in water. Fractions were collected for each peak; however, LC–MS analysis did not identify any fraction containing the desired molecular weight. No isolable product was obtained. For algorithmic consistency, the code S2\_11-Hy is retained; MeOH blank was used in place of this substrate in subsequent steps.

#### N-(pivaloyloxy)thiophene-2-carboxamide (S2\_12-Hy)

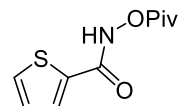

Following **General Procedure A** using thiophene-2-carboxylic acid (256 mg, 2.00 mmol). The crude material was purified by column chromatography (40% EtOAc in hexane) to give hydroxamate ester **S-18** as a white solid (171 mg, 37%).

<sup>1</sup>H NMR (400 MHz, CD<sub>3</sub>OD) δ 7.76 (dt, *J* = 5.1, 1.4 Hz, 1 H, 5-H), 7.72 (dd, *J* = 3.8, 1.2 Hz, 1 H, 3-H), 7.18 (ddd, *J* = 5.2, 3.7, 1.6 Hz, 1 H, 4-H), 1.36 (s, 9 H, Piv CH<sub>3</sub>); <sup>13</sup>C NMR (101 MHz, CD<sub>3</sub>OD) δ 176.2 (Piv C=O), 161.5 (amide C=O), 134.4 (C-2), 131.3 (C-3), 129.4 (C-5), 127.6 (C-4), 38.0 (Piv C), 26.1 (Piv CH<sub>3</sub>); HRMS (ESI) *m/z* Calculated for C<sub>10</sub>H<sub>14</sub>NO<sub>3</sub>S [M+H]<sup>+</sup> 228.0689; Found 228.0688.

#### (Pyridin-4-yl)formamido 2,2-dimethylpropanoate (S2\_13-Hy)

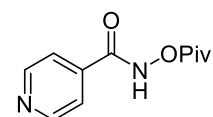

Following **General Procedure A** using isonicotinic acid (246 mg, 2.00 mmol). The crude material was purified by column chromatography (60% EtOAc in hexane) to give hydroxamate ester **S-19** as a yellow solid (212 mg, 47%).

<sup>1</sup>H NMR (400 MHz, CDCl<sub>3</sub>) δ 8.79–8.62 (m, 2 H, H-2 and H-6), 7.68 (dd, *J* = 4.0, 1.9 Hz, 2 H, H-3 and H-5), 1.35 (s, 9 H, Piv CH<sub>3</sub>); <sup>13</sup>C NMR (101 MHz, CDCl<sub>3</sub>) δ 176.6 (Piv C=O), 164.2 (amide C=O), 150.3 (C-3 and C-5), 138.8 (C-1), 121.4 (C-2 and C-6), 38.5 (Piv C), 27.0 (Piv CH<sub>3</sub>); HRMS (ESI) *m/z* Calculated for C<sub>11</sub>H<sub>15</sub>N<sub>2</sub>O<sub>3</sub> [M+H]<sup>+</sup> 223.1077; Found 223.1076.

## 2. Hit Compound Structural Elucidation

### General Procedure B – Rh-Catalysed Annulation

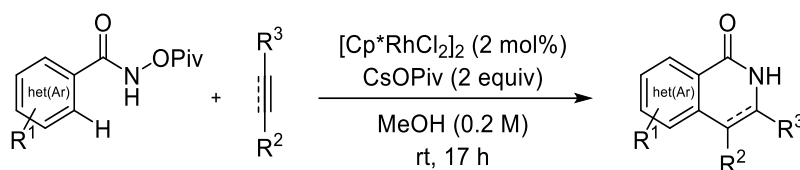

To a solution of  $[\text{Cp}^*\text{RhCl}_2]_2$  (2 mol%, 0.004 mmol) in MeOH (10 mL) was added CsOPiv (0.4 mmol), then the hydroxamate ester of choice (0.2 mmol) and lastly the alkene/alkyne co-substrate (0.22 mmol). The mixture was stirred for 17 h at room temperature. The mixture was concentrated *in vacuo* and the crude residue was purified by column chromatography under the specified conditions to give the corresponding annulation product.

#### 2-(3-(2,5-Dimethylphenyl)-1-oxo-1,2-dihydroisoquinolin-6-yl)acetonitrile (R1-1)

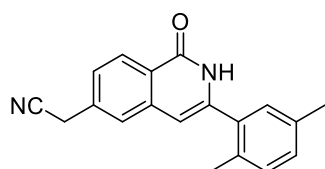

Prepared according to **General Procedure B** using [4-(cyanomethyl)phenyl]formamido 2,2-dimethylpropanoate (**S1\_8-Hy**, 57 mg) as substrate and 2-ethynyl-1,4-dimethylbenzene (32  $\mu\text{L}$ ) as co-substrate. The crude material was purified by column chromatography (20% to 50% EtOAc in pentane) to give **R1-1** as a colourless oil (11 mg,

20%).  $^1\text{H}$  NMR (400 MHz,  $\text{CDCl}_3$ )  $\delta$  9.02 (br s, 1 H, NH), 8.40 (d,  $J = 8.3$  Hz, 1 H, 8-H), 7.58 (d,  $J = 1.8$  Hz, 1 H, 5-H), 7.40 (dd,  $J = 8.2, 1.8$  Hz, 1 H, 7-H), 7.24–7.19 (m, 3 H, 3  $\times$   $\text{H}_{\text{Ar}}$ , phenyl-H all), 6.47 (s, 1 H, 4-H), 3.91 (s, 2 H,  $\text{CH}_2\text{CN}$ ), 2.38 (s, 3 H,  $\text{CH}_3$ ), 2.37 (s, 3 H,  $\text{CH}_3$ );  $^{13}\text{C}$  NMR (101 MHz,  $\text{CDCl}_3$ )  $\delta$  162.6 (amide  $\text{C}=\text{O}$ ), 141.0 (phenyl C-1), 138.7 (phenyl C-5), 136.0 (C-6), 134.8 (C-4a), 134.2 (phenyl C-2), 132.8 (C-3), 131.0 (phenyl C-3), 130.4 (phenyl C-4), 129.7 (C-7), 128.7 (C-8), 126.1 (phenyl C-6), 125.4 (C-5), 124.4 (C-8a), 117.1 (CN), 105.9 (C-4), 23.9 ( $\text{CH}_2$ ), 20.8 ( $\text{CH}_3$ ), 19.6 ( $\text{CH}_3$ ); HRMS (ESI)  $m/z$  Calculated for  $\text{C}_{19}\text{H}_{17}\text{N}_2\text{O}$   $[\text{M}+\text{H}]^+$  289.1335; Found 289.1333.

#### 6-Bromo-3-(2,5-dimethylphenyl)-5-fluoroisoquinolin-1(2H)-one (R1-2)

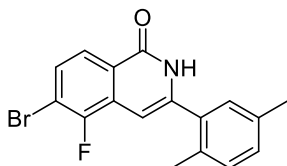

Prepared according to **General Procedure B** using (4-bromo-3-fluorophenyl)formamido 2,2-dimethylpropanoate (**S1\_10-Hy**, 68 mg) as substrate and 2-ethynyl-1,4-dimethylbenzene (32  $\mu\text{L}$ ) as co-substrate. The crude material was purified by column chromatography (20% to 50% acetone

in pentane) to give **R1-2** as a pale yellow oil (18 mg, 25%).  $^1\text{H}$  NMR (500 MHz,  $\text{CDCl}_3$ )  $\delta$  9.14 (br s, 1 H, NH), 8.04 (d,  $J_{\text{CF}} = 8.6$  Hz, 1 H, 7-H), 7.60 (dd,  $J_{\text{CF}} = 8.6, 6.3$  Hz, 1 H, 8-H), 7.21 (dd,  $J_{\text{CF}} = 4.7, 2.3$  Hz, 3 H, all phenyl-H), 6.66 (s, 1 H, 4-H), 2.38 (s, 3 H,  $\text{CH}_3$ ), 2.36 (s, 3 H,  $\text{CH}_3$ );  $^{13}\text{C}$  NMR (126 MHz,  $\text{CDCl}_3$ )  $\delta$  161.8 (amide  $\text{C}=\text{O}$ ), 154.2 (d,  $J_{\text{CF}} = 256.5$  Hz, C-5), 141.8 (phenyl C-1), 136.1 (phenyl C-5), 134.0 (C-3), 132.8 (phenyl C-2), 131.1 (C-8), 130.7 (phenyl C-3), 130.3 (phenyl C-4), 129.7 (phenyl C-6), 128.4 (d,  $J_{\text{CF}} = 17.3$  Hz, C-4a), 125.4 (C-8a), 124.0 (d,  $J_{\text{CF}} = 5.0$  Hz, C-7), 113.2 (d,  $J_{\text{CF}} = 17.5$  Hz, C-6), 98.3 (d,  $J_{\text{CF}} =$

5.9 Hz, C-4), 20.8 (CH<sub>3</sub>), 19.5 (CH<sub>3</sub>); <sup>19</sup>F{<sup>1</sup>H} NMR (471 MHz, CDCl<sub>3</sub>) δ -114.55 (s); HRMS (ESI) m/z Calculated for C<sub>17</sub>H<sub>14</sub>NOBrF [M+H]<sup>+</sup> 346.0237; Found 346.0231.

### 5-((2,5-difluorophenoxy)methyl)-2-(trifluoromethyl)thieno[2,3-c]pyridin-7(6H)-one (R1-3)

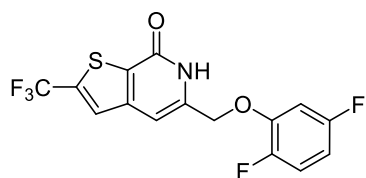

Prepared according to **General Procedure B** using [5-(Trifluoromethyl)thiophen-2-yl]formamido-2,2-dimethylpropanoate (**S1\_9-Hy**, 59 mg) as substrate and 2-(allyloxy)-1,4-difluorobenzene (38 mg) as co-substrate. The crude material was purified by column chromatography (20% to 50% ethyl acetate in pentane) to give **R1-3** as

a colourless oil (14 mg, 20%). <sup>1</sup>H NMR (400 MHz, CDCl<sub>3</sub>) δ 10.81 (br s, NH), 7.64–7.57 (d, *J* = 1.1 Hz, 1 H, phenyl 6-H), 7.10 (ddd, *J* = 10.5, 9.0, 5.1 Hz, 1 H, phenyl 3-H), 6.88 (ddd, *J* = 9.4, 6.6, 3.0 Hz, 1 H, phenyl 4-H), 6.80–6.75 (d, *J* = 1.0 Hz, 1 H, 3-H), 6.77–6.68 (m, 1 H, 4-H), 5.11 (s, 2 H, CH<sub>2</sub>); <sup>13</sup>C NMR (from HSQC, CDCl<sub>3</sub>) δ 125.8 (phenyl C-6), 117.1 (phenyl C-3), 109.0 (C-3), 104.7 (phenyl C-4), 102.1 (C-4), 68.1 (CH<sub>2</sub>); <sup>19</sup>F{<sup>1</sup>H} NMR (471 MHz, CDCl<sub>3</sub>) δ -56.67 (s), -115.76 - -115.87 (m), -138.35 - -138.47 (m); HRMS (ESI) m/z Calculated for C<sub>15</sub>H<sub>9</sub>NO<sub>2</sub>SF<sub>5</sub> [M+H]<sup>+</sup> 362.0269; Found 362.0271.

### 3-Phenyl-3,4-dihydroisoquinolin-1(2H)-one (R1-4)

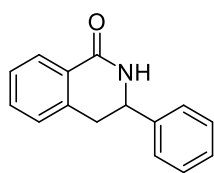

Prepared according to **General Procedure B** using phenylformamido 2,2-dimethylpropanoate (**S1\_11-Hy**, 44 mg) as substrate and styrene (25 μL) as co-substrate. The crude material was purified by column chromatography (10% to 40% ethyl acetate in pentane) to give **R1-4** as a colourless oil (24 mg, 54%). <sup>1</sup>H NMR

(500 MHz, CDCl<sub>3</sub>) δ 8.18–8.10 (m, 1 H, 6-H), 7.48 (td, *J* = 7.5, 1.5 Hz, 1 H, 8-H), 7.44–7.33 (m, 6 H, 5-H and all phenyl-H), 7.20 (dd, *J* = 7.5, 1.3 Hz, 1 H, 7-H), 6.10 (br s, 1 H, NH), 4.87 (ddd, *J* = 10.9, 4.9, 1.2 Hz, 1 H, 3-H), 3.31–3.06 (m, 2 H, 4-H); <sup>13</sup>C NMR (126 MHz, CDCl<sub>3</sub>) δ 166.3 (amide C=O), 140.9 (phenyl C-1), 137.6 (C-4a), 132.5 (C-8a), 129.0 (C-6), 128.4 (C-7), 128.3 (phenyl C-2 and C-6), 128.1 (phenyl C-4), 127.31 (C-5), 127.29 (C-8), 126.4 (phenyl C-3 and C-5), 56.2 (C-3), 37.5 (C-4); HRMS (ESI) m/z Calculated for C<sub>15</sub>H<sub>14</sub>NO [M+H]<sup>+</sup> 224.1070; Found 224.1065. (DHQ = dihydroisoquinoline scaffold)

## 4. Characterisation Directly From Compound Stocks

Following the general reaction protocol described in Section A (reaction set-up, purification, plating and drying) the pure isolated products were stored for future analysis. The products that were flagged as biologically active (with an induction above 5%) were characterised by NMR and HRMS to confirm molecular structure. For NMR analysis, each dry compound of interest was dissolved in  $\text{CDCl}_3$  (200  $\mu\text{L}$  – 400  $\mu\text{L}$ ) and transferred to 3 mm NMR tubes.  $^1\text{H}$  and  $^{13}\text{C}$  NMR spectra were then recorded in series on a 600 MHz spectrometer. Where insufficient material was available to acquire a full  $^{13}\text{C}$  NMR spectrum, carbon resonances were assigned based on HSQC and HMBC correlation data. Chemical shifts ( $\delta$ ) are reported in parts per million (ppm) relative to tetramethylsilane (TMS) as the internal standard. *Residual peaks arising from DMSO, used to dissolve the crude reaction mixtures prior to purification, may be present and are noted where applicable. As DMSO is also the solvent used to dissolve compounds prior to biological testing, its presence does not interfere with assay interpretation or compound evaluation.*

### 3-(p-Tolyl)isoquinolin-1(2H)-one (R2-1)

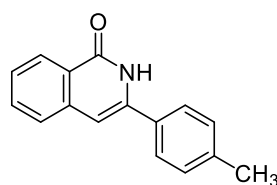

$^1\text{H}$  NMR (600 MHz,  $\text{CDCl}_3$ )  $\delta$  8.84 (br s, 1 H, NH), 8.43–8.39 (m, 1 H, 6-H), 7.69 (dd,  $J$  = 8.2, 7.0 Hz, 1 H, 8-H), 7.60 (d,  $J$  = 8.1 Hz, 1 H, 5-H), 7.56–7.53 (m, 2 H, phenyl 2-H and phenyl 6-H), 7.49 (dd,  $J$  = 8.2, 7.0 Hz, 1 H, 7-H), 7.33 (d,  $J$  = 8.0 Hz, 2 H, phenyl 3-H and phenyl 5-H), 6.75 (s, 1 H, 4-H), 2.44 (s, 3 H,  $\text{CH}_3$ );  $^{13}\text{C}$  NMR (from HSQC,  $\text{CDCl}_3$ )  $\delta$  133.0 (C-8), 130.1 (phenyl C-3 and phenyl C-5), 127.5 (C-6), 126.7 (C-7), 126.6 (C-5), 125.6 (phenyl C-2 and phenyl C-6), 103.8 (C-4), 21.3 ( $\text{CH}_3$ ); (from HMBC,  $\text{CDCl}_3$ )  $\delta$  139.8 (phenyl C-1), 133.1 (C-8a), 130.1 (phenyl C-4), 126.4 (C-4a), 125.4 (C-3); HRMS (ESI)  $m/z$  Calculated for  $\text{C}_{16}\text{H}_{14}\text{NO}$   $[\text{M}+\text{H}]^+$  236.1070; Found 236.1069.

### 3-(Bicyclo[4.2.0]octa-1,3,5-trien-3-yl)-3,4-dihydroisoquinolin-1(2H)-one (R2-2)

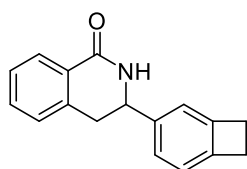

$^1\text{H}$  NMR (600 MHz,  $\text{CDCl}_3$ )  $\delta$  8.12 (dd,  $J$  = 7.7, 1.4 Hz, 1 H, 6-H), 7.47 (td,  $J$  = 7.5, 1.5 Hz, 1 H, 8-H), 7.38 (tt,  $J$  = 7.6, 1.1 Hz, 1 H, 5-H), 7.25–7.16 (m, 2 H, phenyl 2-H and phenyl 6-H), 7.12 (d,  $J$  = 1.5 Hz, 1 H, phenyl 5-H), 7.07 (dd,  $J$  = 7.4, 0.9 Hz, 1 H, phenyl 7-H), 5.94 (s, 1 H, NH), 4.81 (dd,  $J$  = 11.7, 4.4 Hz, 1 H, 3-H), 3.21–3.17 (m, 1 H, 4-H), 3.19 (s, 4 H, all cyclobutyl H), 3.12–3.06 (m, 1 H, 4-H);  $^{13}\text{C}$  NMR (151 MHz,  $\text{CDCl}_3$ )  $\delta$  166.4 (amide C=O), 146.6 (phenyl C-3), 146.2 (phenyl C-4), 139.6 (phenyl C-1), 137.8 (C-4a), 132.5 (C-6), 128.3 (C-8a), 128.1 (C-7), 127.4 (C-5), 127.3 (C-8), 125.2 (phenyl C-2), 123.0 (phenyl C-5), 120.7 (phenyl C-6), 56.9 (C-3), 37.9 (C-4), 29.5 (2  $\times$  cyclobutyl C); HRMS (ESI)  $m/z$  Calculated for  $\text{C}_{17}\text{H}_{16}\text{NO}$   $[\text{M}+\text{H}]^+$  250.1226; Found 250.1224.

### 6-methyl-3-(o-tolyl)isoquinolin-1(2H)-one (R2-3)

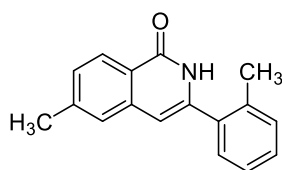

$^1\text{H}$  NMR (600 MHz,  $\text{CDCl}_3$ )  $\delta$  9.08 (br s, 1 H, NH), 8.27 (d,  $J$  = 8.2 Hz, 1 H, 8-H), 7.39–7.34 (m, 3 H, 5-H, phenyl 5-H and phenyl 6-H), 7.33–7.27 (m, 3 H, 7-H, phenyl 3-H and phenyl 4-H), 6.41 (s, 1 H, 4-H), 2.50 (s, 3 H, phenyl  $\text{CH}_3$ ), 2.39 (s, 3 H,  $\text{CH}_3$ );  $^{13}\text{C}$  NMR (151 MHz,  $\text{CDCl}_3$ )  $\delta$  163.2 (amide C=O), 143.5 (C-6), 139.7 (phenyl C-1), 138.3 (phenyl C-2), 136.2 (C-4a), 134.9 (C-3), 130.9 (phenyl C-3), 129.6 (C-7), 129.4



(phenyl C-4), 129.2 (C-8), 128.3 (C-5), 127.4 (phenyl C-6), 126.3 (phenyl C-5), 126.1 (C-8a), 106.4 (C-4), 21.9 (CH<sub>3</sub>), 20.1 (CH<sub>3</sub>); HRMS (ESI) *m/z* Calculated for C<sub>17</sub>H<sub>16</sub>NO [M+H]<sup>+</sup> 250.1226; Found 250.1223.

#### 6-fluoro-3-(p-tolyl)isoquinolin-1(2H)-one (R2-4)

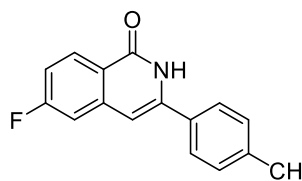 <sup>1</sup>H NMR (600 MHz, CDCl<sub>3</sub>) δ 9.62 (br s, 1 H, NH), 8.39 (dd, *J* = 8.8, 5.8 Hz, 1 H, 8-H), 7.60–7.56 (m, 2 H, phenyl 2-H and phenyl 6-H), 7.35–7.30 (m, 2 H, phenyl 3-H and phenyl 5-H), 7.21 (dd, *J* = 9.4, 2.5 Hz, 1 H, 7-H), 7.16 (dd, *J* = 8.6, 2.5 Hz, 1 H, 5-H), 6.68 (s, 1 H, 4-H), 2.43 (s, 3 H, CH<sub>3</sub>); <sup>13</sup>C NMR (151 MHz, CDCl<sub>3</sub>) δ 165.6 (d, *J*<sub>CF</sub> = 254.4 Hz, C-6), 163.0 (amide C=O), 140.8 (C-3), 140.7 (d, *J*<sub>CF</sub> = 12.6 Hz, C-4a), 140.2 (phenyl C-1), 131.1 (phenyl C-4), 130.7 (d, *J*<sub>CF</sub> = 10.9 Hz, C-8), 130.1 (phenyl C-2 and phenyl C-6), 125.9 (phenyl C-3 and phenyl C-5), 121.5 (C-8a), 115.2 (d, *J*<sub>CF</sub> = 25.3 Hz, C-5), 111.2 (d, *J*<sub>CF</sub> = 21.3 Hz, C-7), 103.2 (d, *J*<sub>CF</sub> = 5.4 Hz, C-4), 21.3 (CH<sub>3</sub>); <sup>19</sup>F{<sup>1</sup>H} NMR (376 MHz, CDCl<sub>3</sub>) δ –105.9 (s); HRMS (ESI) *m/z* Calculated for C<sub>16</sub>H<sub>13</sub>FNO [M+H]<sup>+</sup> 254.0976; Found 254.0976.

#### 6-fluoro-3-(o-tolyl)isoquinolin-1(2H)-one (R2-5)

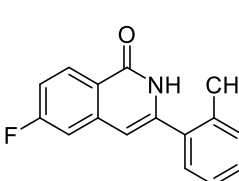 <sup>1</sup>H NMR (600 MHz, CDCl<sub>3</sub>) δ 8.43–8.37 (m, 1 H, 8-H), 7.42–7.37 (m, 2 H, 5-H and 7-H), 7.36–7.29 (m, 2 H, phenyl 5-H and phenyl 6-H), 7.20 (m, 2 H, phenyl 3-H and phenyl 4-H), 6.42 (d, *J* = 2.6 Hz, 1 H, 4-H), 2.41 (s, 3 H, CH<sub>3</sub>); <sup>13</sup>C NMR (151 MHz, CDCl<sub>3</sub>) δ 165.6 (d, *J*<sub>CF</sub> = 254.6 Hz, C-6), 162.7 (amide C=O), 141.3 (C-3), 140.4 (d, *J*<sub>CF</sub> = 11.9 Hz, C-4a), 136.1 (phenyl C-1), 134.4 (phenyl C-2), 131.0 (C-8a), 130.8 (d, *J*<sub>CF</sub> = 11.8 Hz, C-5), 129.7 (phenyl C-3), 129.2 (phenyl C-4), 126.3 (phenyl C-6), 121.5 (phenyl C-5), 115.3 (d, *J*<sub>CF</sub> = 21.3 Hz, C-7), 111.2 (d, *J*<sub>CF</sub> = 10.1 Hz, C-8), 105.9 (d, *J*<sub>CF</sub> = 5.4 Hz, C-4), 20.1 (CH<sub>3</sub>); <sup>19</sup>F{<sup>1</sup>H} NMR (376 MHz, CDCl<sub>3</sub>) δ –105.8 (s); HRMS (ESI) *m/z* Calculated for C<sub>16</sub>H<sub>13</sub>FNO [M+H]<sup>+</sup> 254.0976; Found 254.0973.

#### 6-fluoro-3-(2-fluorophenyl)-3,4-dihydroisoquinolin-1(2H)-one (R2-6)

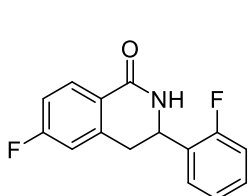 <sup>1</sup>H NMR (600 MHz, CDCl<sub>3</sub>) δ 8.13 (dd, *J* = 8.6, 5.8 Hz, 1 H, 8-H), 7.38 (td, *J* = 7.6, 1.7 Hz, 1 H, phenyl 4-H), 7.34–7.28 (m, 1 H, phenyl 3-H), 7.14 (td, *J* = 7.6, 1.2 Hz, 1 H, 6-H), 7.09 (ddd, *J* = 10.6, 8.2, 1.2 Hz, 1 H, phenyl 4-H), 7.05 (td, *J* = 8.6, 2.5 Hz, 1 H, phenyl 5-H), 6.88 (dt, *J* = 8.7, 1.8 Hz, 1 H, phenyl 6-H), 6.13 (br s, 1 H, NH), 5.25 (ddd, *J* = 9.1, 5.1, 2.0 Hz, 1 H, 3-H), 3.29 (dd, *J* = 15.9, 5.1 Hz, 1 H, 4-H<sub>a</sub>), 3.18 (dd, *J* = 15.9, 9.0 Hz, 1 H, 4-H<sub>b</sub>); <sup>13</sup>C NMR (151 MHz, CDCl<sub>3</sub>) δ 165.6 (amide C=O), 165.3 (d, *J*<sub>CF</sub> = 253.9 Hz, C-6), 160.0 (d, *J*<sub>CF</sub> = 247.8 Hz, phenyl C-2), 140.0 (d, *J*<sub>CF</sub> = 9.7 Hz, C-4a), 130.9 (d, *J*<sub>CF</sub> = 11.5 Hz, C-8), 130.0 (d, *J*<sub>CF</sub> = 8.3 Hz, phenyl C-4 and phenyl C-6), 127.7 (d, *J*<sub>CF</sub> = 12.5 Hz, phenyl C-1), 127.3 (d, *J*<sub>CF</sub> = 3.8 Hz, phenyl C-5), 124.7 (d, *J*<sub>CF</sub> = 3.8 Hz, C-8a), 124.6 (d, *J*<sub>CF</sub> = 2.9 Hz, C-7), 114.7 (d, *J*<sub>CF</sub> = 22.1 Hz, C-5), 114.4 (d, *J*<sub>CF</sub> = 22.4 Hz, phenyl C-3), 48.9 (d, *J*<sub>CF</sub> = 3.4 Hz, C-3), 35.3 (C-4); <sup>19</sup>F{<sup>1</sup>H} NMR (376 MHz, CDCl<sub>3</sub>) δ –106.2 (s), –118.8 (s); HRMS (ESI) *m/z* Calculated for C<sub>15</sub>H<sub>12</sub>F<sub>2</sub>NO [M+H]<sup>+</sup> 260.0881; Found 260.0879.

**6-methyl-3-phenyl-3,4-dihydroisoquinolin-1(2H)-one (R2-7)**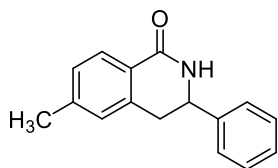

$^1\text{H}$  NMR (600 MHz,  $\text{CDCl}_3$ )  $\delta$  8.02 (d,  $J$  = 7.9 Hz, 1 H, 8-H), 7.43–7.37 (m, 4 H, phenyl 2-H, phenyl 6-H, phenyl 3-H and phenyl 5-H), 7.36 (dt,  $J$  = 6.4, 2.8 Hz, 1 H, 5-H), 7.21–7.18 (m, 1 H, phenyl 4-H), 7.00–6.98 (m, 1 H, 7-H), 5.93 (br s, 1 H, NH), 4.84 (ddd,  $J$  = 11.2, 4.6, 1.2 Hz, 1 H, 3-H), 3.17 (dd,  $J$  = 15.7, 11.2 Hz, 1 H, 4-H<sub>a</sub>), 3.08 (ddd,  $J$  = 15.9, 4.7, 1.2 Hz, 1 H, 4-H<sub>b</sub>), 2.39 (s, 3 H,  $\text{CH}_3$ );  $^{13}\text{C}$  NMR

(151 MHz,  $\text{CDCl}_3$ )  $\delta$  166.5 (amide C=O), 143.1 (C-6), 141.0 (C-4a), 137.5 (phenyl C-1), 129.0 (C-8), 128.4 (phenyl C-3 and phenyl C-5), 128.11 (C-8a), 128.09 (C-5), 127.9 (phenyl C-4), 126.4 (phenyl C-2 and phenyl C-6), 125.7 (C-7), 56.3 (C-3), 37.5 (C-4), 21.6 ( $\text{CH}_3$ ); HRMS (ESI)  $m/z$  Calculated for  $\text{C}_{16}\text{H}_{16}\text{NO}$   $[\text{M}+\text{H}]^+$  238.1226; Found 238.1224.

**6-methyl-3-(p-tolyl)isoquinolin-1(2H)-one (R2-8)**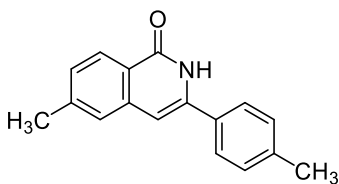

$^1\text{H}$  NMR (600 MHz,  $\text{CDCl}_3$ )  $\delta$  9.00 (br s, 1 H, NH), 8.28 (d,  $J$  = 8.2 Hz, 1 H, 8-H), 7.57–7.50 (m, 2 H, phenyl 2-H and phenyl 6-H), 7.38–7.36 (m, 1 H, 7-H), 7.32–7.30 (m, 2 H, phenyl 3-H and phenyl 5-H), 6.67 (s, 1 H, 5-H), 2.49 (s, 3 H,  $\text{CH}_3$ ), 2.42 (s, 3 H,  $\text{CH}_3$ );  $^{13}\text{C}$  NMR (151 MHz,  $\text{CDCl}_3$ )  $\delta$  163.4 (amide C=O), 143.5 (C-6), 139.8 (C-4a), 139.2 (phenyl C-4), 138.5 (phenyl

C-1), 131.6 (C-3), 130.0 (phenyl C-3 and phenyl C-5), 129.3 (C-8a), 128.3 (C-5), 127.4 (C-7), 126.3 (C-8), 125.6 (phenyl C-2 and phenyl C-6), 103.7 (C-4), 21.9 ( $\text{CH}_3$ ), 21.3 ( $\text{CH}_3$ ); HRMS (ESI)  $m/z$  Calculated for  $\text{C}_{17}\text{H}_{16}\text{NO}$   $[\text{M}+\text{H}]^+$  250.1226; Found 250.1225.

**2-(3-(2-fluorophenyl)-1-oxo-1,2,3,4-tetrahydroisoquinolin-7-yl)acetonitrile (R2-9)**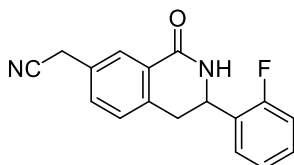

$^1\text{H}$  NMR (600 MHz,  $\text{CDCl}_3$ )  $\delta$  8.13 (d,  $J$  = 8.0 Hz, 1 H, 8-H), 7.37 (td,  $J$  = 7.6, 1.7 Hz, 1 H, phenyl 4-H), 7.34–7.29 (m, 2 H, 6-H and phenyl 3-H), 7.21–7.19 (m, 1 H, phenyl 6-H), 7.16–7.08 (m, 2 H, 5-H and phenyl 5-H), 6.12 (br s, 1 H, NH), 5.25 (ddd,  $J$  = 9.0, 5.1, 2.1 Hz, 1 H, 3-H), 3.79 (s, 2 H,  $\text{CH}_2$ ), 3.33 (dd,  $J$  = 15.9, 5.1 Hz, 1 H, 4-H<sub>a</sub>), 3.20 (dd,  $J$  = 15.8, 8.9 Hz, 1 H, 4-H<sub>b</sub>);  $^{13}\text{C}$  NMR (151

MHz,  $\text{CDCl}_3$ )  $\delta$  165.7 (amide C=O), 160.0 (d,  $J_{\text{CF}}$  = 264.2 Hz, phenyl C-2), 138.2 (C-6), 134.5 (C-4a), 130.0 (d,  $J_{\text{CF}}$  = 8.7 Hz, phenyl C-5), 129.0 (C-8a), 128.2 (C-8), 127.6 (d,  $J_{\text{CF}}$  = 13.3 Hz, phenyl C-4), 127.3 (d,  $J_{\text{CF}}$  = 2.6 Hz, phenyl C-1), 127.0 (C-7 and C-5), 124.7 (d,  $J_{\text{CF}}$  = 3.4 Hz, phenyl C-6), 117.2 (CN), 115.9 (d,  $J_{\text{CF}}$  = 21.5 Hz, phenyl C-3), 48.9 (C-3), 35.1 (C-4), 23.7 ( $\text{CH}_2$ );  $^{19}\text{F}\{^1\text{H}\}$  NMR (376 MHz,  $\text{CDCl}_3$ )  $\delta$  -118.8; HRMS (ESI)  $m/z$  Calculated for  $\text{C}_{17}\text{H}_{14}\text{FN}_2\text{O}$   $[\text{M}+\text{H}]^+$  281.1085; Found 281.1081.

**2-(1-oxo-3-phenyl-1,2,3,4-tetrahydroisoquinolin-6-yl)acetonitrile (R2-10)**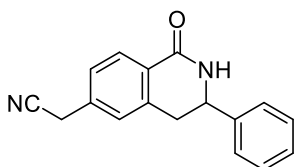

$^1\text{H}$  NMR (600 MHz,  $\text{CDCl}_3$ )  $\delta$  8.13 (dt,  $J$  = 8.0, 2.2 Hz, 1 H, 8-H), 7.43–7.38 (m, 4 H, phenyl 6-H, phenyl 2-H, phenyl 3-H and phenyl 5-H), 7.38–7.35 (m, 1 H, phenyl 4-H), 7.33 (d,  $J$  = 8.1 Hz, 1 H, 7-H), 7.21 (s, 1 H, 5-H), 6.11 (br s, 1 H, NH), 4.92–4.81 (m, 1 H, 3-H), 3.79 (s, 2 H,  $\text{CH}_2$ ), 3.27–3.12 (m, 2 H, 4-H);  $^{13}\text{C}$  NMR (151 MHz,  $\text{CDCl}_3$ )  $\delta$  165.6 (amide C=O), 140.5 (phenyl C-1), 138.6 (C-

4a), 134.4 (C-6), 129.1 (phenyl C-3, phenyl C-5 and C-8a), 129.0 (C-5), 128.6 (C-7), 127.0 (C-8), 126.9

(phenyl C-4), 126.4 (phenyl C-2 and phenyl C-6), 117.2 (CN), 56.0 (C-3), 37.3 (C-4), 23.7 (CH<sub>2</sub>); HRMS (ESI) m/z Calculated for C<sub>17</sub>H<sub>15</sub>N<sub>2</sub>O [M+H]<sup>+</sup> 263.1179; Found 263.1176.

#### 2-(1-oxo-3-(p-tolyl)-1,2-dihydroisoquinolin-6-yl)acetonitrile (R2-11)

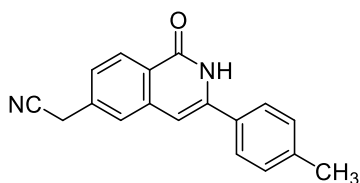

<sup>1</sup>H NMR (600 MHz, CDCl<sub>3</sub>) δ 9.28 (br s, 1 H, NH), 8.41 (d, *J* = 8.2 Hz, 1 H, 8-H), 7.61 (q, *J* = 0.9 Hz, 1 H, 5-H), 7.59–7.55 (m, 2 H, phenyl 2-H and phenyl 6-H), 7.41–7.37 (m, 1 H, 7-H), 7.36–7.32 (m, 2 H, phenyl 3-H and phenyl 5-H), 6.74 (s, 1 H, 4-H), 3.92 (s, 2 H, CH<sub>2</sub>), 2.45 (s, 3 H, CH<sub>3</sub>); <sup>13</sup>C NMR (151 MHz, CDCl<sub>3</sub>) δ 163.0 (amide C=O), 140.4 (phenyl C-4), 140.3 (C-4a), 139.0 (C-6), 134.8 (C-3), 131.1 (phenyl C-1), 130.2 (phenyl C-2 and phenyl C-6), 128.7 (C-7), 126.0 (C-5), 125.8 (phenyl C-3 and phenyl C-5), 125.5 (C-8), 124.5 (C-8a), 117.2 (CN), 103.2 (C-4), 23.9 (CH<sub>2</sub>), 21.4 (CH<sub>3</sub>); HRMS (ESI) m/z Calculated for C<sub>18</sub>H<sub>15</sub>N<sub>2</sub>O [M+H]<sup>+</sup> 275.1179; Found 275.1176.

#### 2-(1-oxo-3-(o-tolyl)-1,2-dihydroisoquinolin-6-yl)acetonitrile (R2-12)

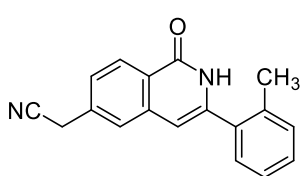

<sup>1</sup>H NMR (600 MHz, CDCl<sub>3</sub>) δ 8.85 (br s, 1 H, NH), 8.34 (d, *J* = 1.9 Hz, 1 H, 8-H), 7.69 (dd, *J* = 8.2, 2.0 Hz, 1 H, phenyl 5-H), 7.62 (d, *J* = 8.1 Hz, 1 H, 7-H), 7.41–7.36 (m, 2 H, 5-H and phenyl 6-H), 7.35–7.29 (m, 2 H, phenyl 3-H and phenyl 4-H), 6.49 (s, 1 H, 4-H), 3.91 (s, 2 H, CH<sub>2</sub>), 2.40 (s, 3 H, CH<sub>3</sub>); <sup>13</sup>C NMR (151 MHz, CDCl<sub>3</sub>) δ 162.5 (amide C=O), 140.7 (phenyl C-2), 138.7 (phenyl C-1), 136.0 (C-4a), 134.9 (C-6), 134.4 (C-3), 131.1 (phenyl C-3), 129.8 (phenyl C-4), 129.1 (phenyl C-6), 128.7 (C-8), 128.4 (C-8a), 126.5 (C-5), 126.2 (C-7), 125.5 (phenyl C-5), 117.2 (CN), 106.0 (C-4), 27.0 (CH<sub>3</sub>), 23.9 (CH<sub>2</sub>); HRMS (ESI) m/z Calculated for C<sub>18</sub>H<sub>15</sub>N<sub>2</sub>O [M+H]<sup>+</sup> 275.1179; Found 275.1176.

#### 2-methyl-5-(p-tolyl)-5,6-dihydrothieno[2,3-c]pyridin-7(4H)-one (R2-14)

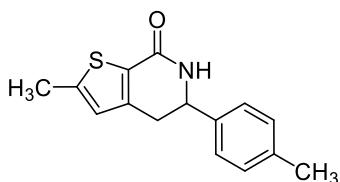

<sup>1</sup>H NMR (600 MHz, CDCl<sub>3</sub>) δ 7.30 (d, *J* = 8.0 Hz, 2 H, phenyl 2-H and phenyl 6-H), 7.26–7.09 (d, *J* = 7.9 Hz, 2 H, phenyl 3-H and phenyl 5-H), 6.61 (d, *J* = 1.2 Hz, 1 H, 3-H), 5.56 (br s, 1 H, NH), 4.89 (dd, *J* = 11.3, 5.6 Hz, 1 H, 3-H), 3.09–2.88 (m, 2 H, 4-H), 2.54 (d, *J* = 1.0 Hz, 3 H, CH<sub>3</sub>), 2.38 (s, 3 H, CH<sub>3</sub>); <sup>13</sup>C NMR (151 MHz, CDCl<sub>3</sub>) δ 163.3 (C=O amide), 156.1 (C-3a), 147.4 (phenyl C-1), 144.5 (phenyl C-4), 138.2 (C-2a), 138.0 (C-3), 129.6 (phenyl C-3 and phenyl C-5), 126.4 (phenyl C-2 and phenyl C-6), 125.4 (C-2), 57.6 (C-5), 34.0 (C-4), 21.1 (CH<sub>3</sub>), 16.0 (CH<sub>3</sub>); HRMS (ESI) m/z Calculated for C<sub>15</sub>H<sub>16</sub>NOS [M+H]<sup>+</sup> 258.0947; Found 258.0945.

#### 2-methyl-5-phenyl-5,6-dihydrothieno[2,3-c]pyridin-7(4H)-one (R2-15)

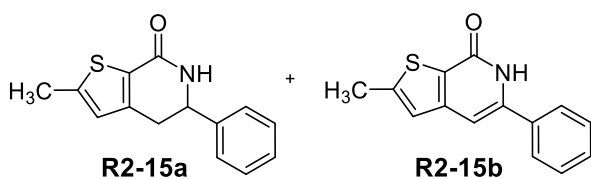

Isolated as a 2:1 mixture of isomers (**R2-15a** and the corresponding unsaturated annulation product **R2-15b**, respectively). The characterisation for the major **R2-15a** is provided below: <sup>1</sup>H NMR (600 MHz, CDCl<sub>3</sub>) δ 7.50 (d, *J* = 3.7 Hz, 1 H, phenyl 4-H), 7.45–7.33 (m, 5 H, phenyl H all), 6.78 (3-H), 5.61 (br s, 1 H, NH), 4.90 (dd, *J* = 11.7, 5.3 Hz, 1 H, 5-H), 3.04 (ddd, *J* = 16.3, 5.3 Hz, 1 H, 4-H<sub>a</sub>), 2.97 (dd, *J* = 16.2, 11.7 Hz, 1 H, 4-H<sub>b</sub>), 2.52 (s, 3 H, CH<sub>3</sub>); <sup>13</sup>C NMR

(151 MHz, CDCl<sub>3</sub>)  $\delta$  163.4 (amide C=O), 147.6 (C-3a), 144.4 (phenyl C-1), 140.9 (C-2a), 131.0 (C-3), 129.0 (phenyl C-3 and phenyl C-5), 126.5 (phenyl C-4), 126.3 (phenyl C-2 and phenyl C-6), 125.4 (C-2), 57.8 (C-5), 38.5 (C-4), 16.0 (CH<sub>3</sub>); HRMS (ESI)  $m/z$  Calculated for **R2-15a** C<sub>14</sub>H<sub>14</sub>NOS [M+H]<sup>+</sup> 244.0791; Found 244.0790; Calculated for **R2-15b** C<sub>14</sub>H<sub>12</sub>NOS [M+H]<sup>+</sup> 242.0645; Found 242.0644.

### 2-(1-oxo-3-phenyl-1,2,3,4-tetrahydroisoquinolin-7-yl)acetonitrile (R2-16)

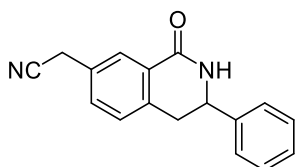

<sup>1</sup>H NMR (600 MHz, CDCl<sub>3</sub>)  $\delta$  8.04 (d,  $J$  = 2.1 Hz, 1 H, 8-H), 7.51–7.47 (m, 1 H, 6-H), 7.42–7.38 (m, 4 H, phenyl 2-H, phenyl 3-H, phenyl 5-H and phenyl 6-H), 7.38–7.34 (m, 1 H, phenyl 4-H), 7.23 (d,  $J$  = 7.8 Hz, 1 H, 5-H), 6.23 (br s, 1 H, NH), 4.86 (ddd,  $J$  = 10.1, 5.6, 1.4 Hz, 1 H, 3-H), 3.80 (s, 2 H, CH<sub>2</sub>), 3.20–3.13 (m, 2 H, 4-H<sub>a</sub> and 4-H<sub>b</sub>); <sup>13</sup>C NMR (151 MHz, CDCl<sub>3</sub>)  $\delta$  165.5 (C=O amide), 140.5 (C-8a), 137.4 (phenyl C-1), 131.7 (C-8), 129.2 (C-7), 129.04 (phenyl C-2 and phenyl C-6), 129.02 (C-6), 128.5 (C-5), 128.4 (C-4a), 127.6 (phenyl C-4), 126.3 (phenyl C-3 and phenyl C-5), 117.4 (CN), 55.9 (C-3), 36.9 (C-4), 23.3 (CH<sub>2</sub>); HRMS C<sub>17</sub>H<sub>15</sub>N<sub>2</sub>O [M+H]<sup>+</sup> 263.1179; Found 263.1179.

### 2-(1-oxo-3-(o-tolyl)-1,2-dihydroisoquinolin-7-yl)acetonitrile (R2-17)

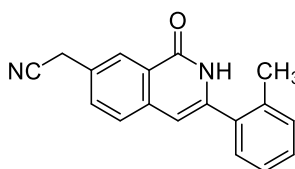

<sup>1</sup>H NMR (600 MHz, CDCl<sub>3</sub>)  $\delta$  8.85 (br s, 1 H, NH), 8.34 (d,  $J$  = 1.9 Hz, 1 H, 8-H), 7.69 (dd,  $J$  = 8.2, 2.0 Hz, 1 H, 5-H), 7.61 (d,  $J$  = 8.1 Hz, 1 H, 6-H), 7.41–7.35 (m, 2 H, phenyl 5-H and phenyl 6-H), 7.35–7.29 (m, 2 H, phenyl 3-H and phenyl 4-H), 3.91 (s, 2 H, CH<sub>2</sub>), 2.40 (s, 3 H, CH<sub>3</sub>); <sup>13</sup>C NMR (151 MHz, CDCl<sub>3</sub>)  $\delta$  162.5 (C=O amide), 140.4 (C-8a), 137.8 (phenyl C-1), 136.1 (C-3), 134.4 (C-4a), 132.3 (C-8), 131.1 (C-5), 129.8 (phenyl C-2), 129.1 (phenyl C-6), 128.4 (phenyl C-3), 127.6 (phenyl C-5), 127.1 (phenyl C-4), 126.4 (C-6), 125.2 (C-7), 117.5 (CN), 106.0 (C-4), 23.7 (CH<sub>2</sub>), 20.1 (CH<sub>3</sub>); HRMS C<sub>18</sub>H<sub>15</sub>N<sub>2</sub>O [M+H]<sup>+</sup> 275.1179; Found 275.1178.

### 2-(3-(2,5-dimethylphenyl)-1-oxo-1,2,3,4-tetrahydroisoquinolin-7-yl)acetonitrile (R2-18)

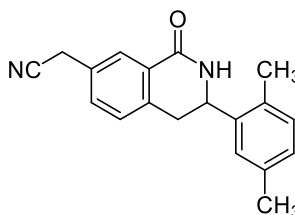

<sup>1</sup>H NMR (600 MHz, CDCl<sub>3</sub>)  $\delta$  8.07 (d,  $J$  = 2.1 Hz, 1 H, 8-H), 7.52 (dd,  $J$  = 7.8, 2.1 Hz, 1 H, 6-H), 7.32 (d,  $J$  = 1.5 Hz, 1 H, phenyl 6-H), 7.28–7.25 (m, 1 H, 5-H), 7.11 (d,  $J$  = 7.4 Hz, 1 H, phenyl 3-H), 7.09–7.05 (m, 1 H, phenyl 4-H), 5.88 (br s, 1 H, NH), 5.10 (dd,  $J$  = 11.8, 4.4 Hz, 1 H, 3-H), 3.82 (s, 2 H, CH<sub>2</sub>), 3.15 (dd,  $J$  = 15.9, 11.8 Hz, 1 H, 4-H<sub>a</sub>), 3.11–3.05 (m, 1 H, 4-H<sub>b</sub>), 2.34 (2  $\times$  s, 6 H, 2  $\times$  CH<sub>3</sub>); <sup>13</sup>C NMR (from HSQC, CDCl<sub>3</sub>)  $\delta$  131.1 (phenyl C-3), 129.1 (phenyl C-4), 128.0 (C-8), 126.2 (phenyl C-6), 120.4 (C-5), 23.3 (CH<sub>2</sub>), 21.2 (CH<sub>3</sub>), 18.8 (CH<sub>3</sub>) other signals not observed due to low quantity of sample; HRMS (ESI)  $m/z$  Calculated for C<sub>19</sub>H<sub>19</sub>N<sub>2</sub>O [M+H]<sup>+</sup> 291.1492; Found 291.1490.

### 6-bromo-5-fluoro-3-(o-tolyl)isoquinolin-1(2H)-one (R2-19)

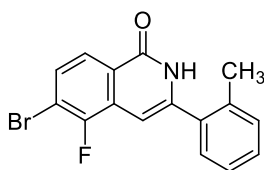

<sup>1</sup>H NMR (600 MHz, CDCl<sub>3</sub>)  $\delta$  8.58 (br s, 1 H, NH), 8.08 (d,  $J$  = 8.6 Hz, 1 H, 7-H), 7.62 (dd,  $J$  = 8.6, 6.4 Hz, 1 H, 8-H), 7.45–7.29 (m, 4 H, all phenyl H), 6.67 (s, 1 H, 4-H), 2.41 (s, 3 H, CH<sub>3</sub>); <sup>13</sup>C NMR (from HSQC, CDCl<sub>3</sub>)  $\delta$  131.2 (phenyl C-6), 130.4 (C-8), 130.1 (phenyl C-3), 129.1 (phenyl C-5), 126.6 (phenyl C-4), 124.2 (C-7), 98.4 (C-4), 20.1 (CH<sub>3</sub>); (from HMBC, CDCl<sub>3</sub>)  $\delta$  161.7 (C=O amide),

153.9 (C-5), 141.5 (C-3), 135.9 (phenyl C-1), 134.4 (phenyl C-2), 134.2 (C-4a), 128.2 (C-6), 125.4 (C-8a);  $^{19}\text{F}\{^1\text{H}\}$  NMR (376 MHz,  $\text{CDCl}_3$ )  $\delta$  -114.4 (s); HRMS (ESI)  $m/z$  Calculated for  $\text{C}_{16}\text{H}_{12}\text{BrFNO}$   $[\text{M}+\text{H}]^+$  332.0081; Found 332.0081.

### 2-(3-cyclopentyl-1-oxo-1,2-dihydroisoquinolin-7-yl)acetonitrile (R2-O1)

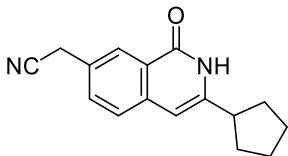

$^1\text{H}$  NMR (600 MHz,  $\text{CDCl}_3$ )  $\delta$  8.84 (br s, 1 H, NH), 8.30–8.23 (m, 1 H, 8-H), 7.63 (dd,  $J$  = 8.2, 2.0 Hz, 1 H, 5-H), 7.52 (d,  $J$  = 8.2 Hz, 1 H, 6-H), 6.37–6.32 (m, 1 H, 4-H), 3.87 (s, 2 H,  $\text{CH}_2$ ), 2.95 (p,  $J$  = 8.3 Hz, 1 H, cyclopentyl 1-H), 2.17–2.07 (m, 2 H, cyclopentyl 2- $\text{H}_a$  and cyclopentyl 5- $\text{H}_a$ ), 1.86 (qd,  $J$  = 4.8, 2.0 Hz, 2 H, cyclopentyl 2- $\text{H}_b$  and cyclopentyl 5- $\text{H}_b$ ), 1.74 (dddd,  $J$  = 17.3, 14.9, 12.3, 8.4 Hz, 4 H, cyclopentyl 3-H and 4-H);  $^{13}\text{C}$  NMR (151 MHz,  $\text{CDCl}_3$ )  $\delta$  145.1 (C-3), 138.2 (C-6), 132.2 (C-5), 127.6 (C-7), 126.9 (C-8), 117.6 (CN), 101.9 (C-4), 43.4 ( $\text{CH}_2$ ), 31.7 (cyclopentyl C-1), 25.3 (cyclopentyl C-2 and cyclopentyl C-5), 23.6 (cyclopentyl C-3 and cyclopentyl C-4) – not observed: amide C=O, C-4a and C-8a due to low quantity of sample; HRMS (ESI)  $m/z$  Calculated for  $\text{C}_{16}\text{H}_{17}\text{N}_2\text{O}$   $[\text{M}+\text{H}]^+$  253.1335; Found 253.1335.

### 6-bromo-5-fluoro-3-(4-fluorophenyl)-3,4-dihydroisoquinolin-1(2H)-one (R2-O2)

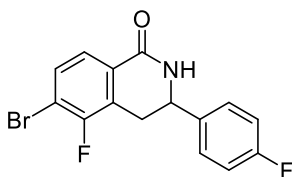

$^1\text{H}$  NMR (600 MHz,  $\text{CDCl}_3$ )  $\delta$  7.86–7.79 (m, 1 H, 8-H), 7.59 (dd,  $J$  = 8.2, 6.5 Hz, 1 H, 7-H), 7.43–7.35 (m, 2 H, phenyl 2-H and phenyl 6-H), 7.16–7.05 (m, 2 H, phenyl 3-H and phenyl 5-H), 5.99 (br s, 1 H, NH), 4.86 (dd,  $J$  = 11.2, 4.6 Hz, 1 H, 3-H), 3.35 (dd,  $J$  = 16.4, 4.7 Hz, 1 H, 4- $\text{H}_a$ ), 3.06 (dd,  $J$  = 16.4, 11.2 Hz, 1 H, 4- $\text{H}_b$ );  $^{13}\text{C}$  NMR (151 MHz,  $\text{CDCl}_3$ )  $\delta$  164.6 (amide C=O), 162.7 (d,  $J_{\text{CF}}$  = 246.5 Hz, C-5), 155.4 (d,  $J_{\text{CF}}$  = 247.2 Hz, phenyl C-4), 136.0 (d,  $J_{\text{CF}}$  = 3.1 Hz, phenyl C-1), 132.0 (C-8a), 129.2 (d,  $J_{\text{CF}}$  = 3.5 Hz, C-8), 128.2 (d,  $J_{\text{CF}}$  = 2.8 Hz, phenyl C-2 and phenyl C-6), 125.6 (d,  $J_{\text{CF}}$  = 20.1 Hz, C-4a), 124.6 (d,  $J_{\text{CF}}$  = 4.7 Hz, C-7), 116.2 (d,  $J_{\text{CF}}$  = 4.7 Hz, phenyl C-3 and phenyl C-5), 114.2 (d,  $J_{\text{CF}}$  = 21.1 Hz, C-6), 55.02 (C-3), 30.40 (C-4);  $^{19}\text{F}\{^1\text{H}\}$  NMR (376 MHz,  $\text{CDCl}_3$ )  $\delta$  -111.93 (s), -112.70 (s); HRMS (ESI)  $m/z$  Calculated for  $\text{C}_{15}\text{H}_{11}\text{BrF}_2\text{NO}$   $[\text{M}+\text{H}]^+$  339.1598; Found 339.1576.

## References

1. M.-A. Bray, S. Singh, H. Han, C. T. Davis, B. Borgeson, C. Hartland, M. Kost-Alimova, S. M. Gustafsdottir, C. Gibson, and A. E. *Nat. Protoc.* 2016, **11**, 1757.
2. M. H. Woehrmann, W. M. Bray, J. K. Durbin, S. C. Nisam, A. K. Michael, E. Glassey, J. M. Stuart and R. S. Lokey, *Mol. BioSyst.* 2013, **9**, 2604.
3. T. Voigt, C. Gerding-Reimers, T. T. Ngoc Tran, S. Bergmann, H. Lachance, B. Schölermann, A. Brockmeyer, P. Janning, S. Ziegler and H. Waldmann, *Angew. Chem. Int. Ed.*, 2013, **52**, 410–414.
4. M. L. Shelanski, F. Gaskin and C. R. Cantor, *PNAS*, 1973, **70**, 765–768.

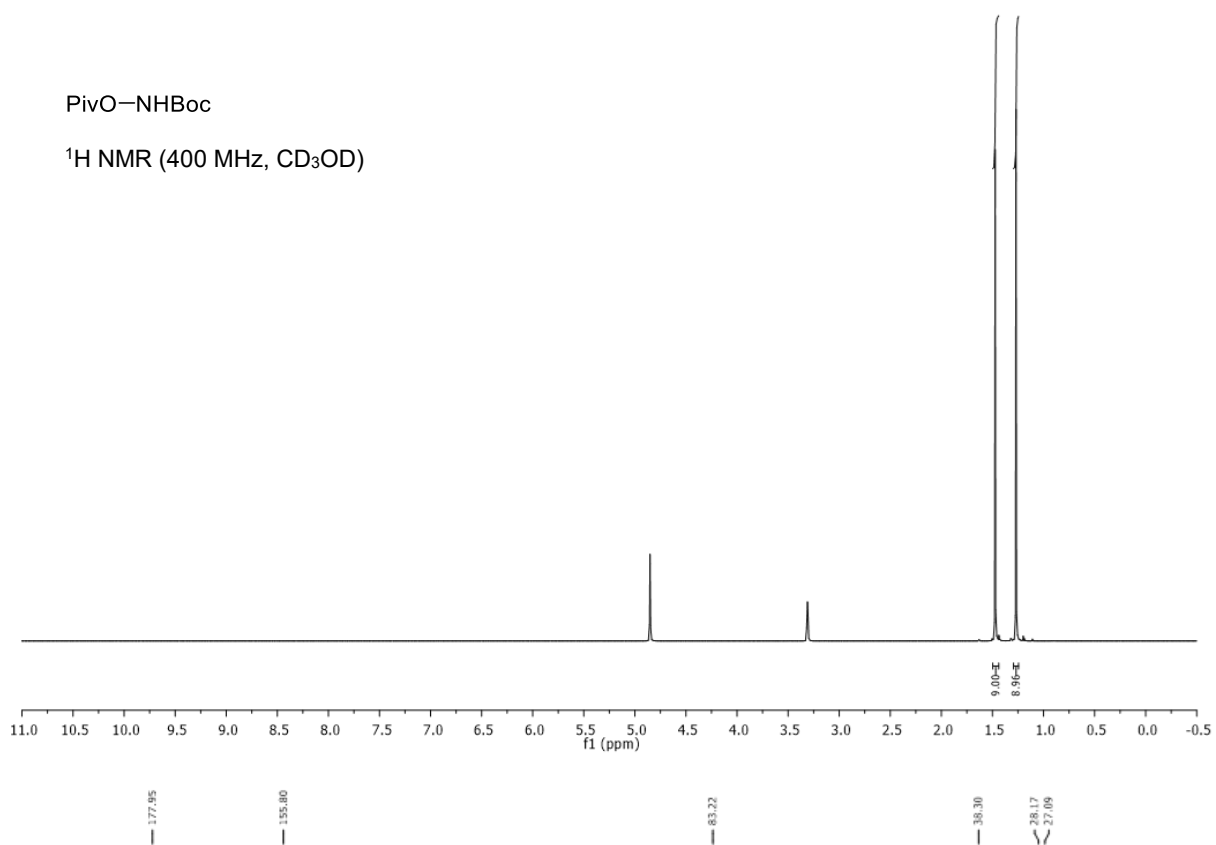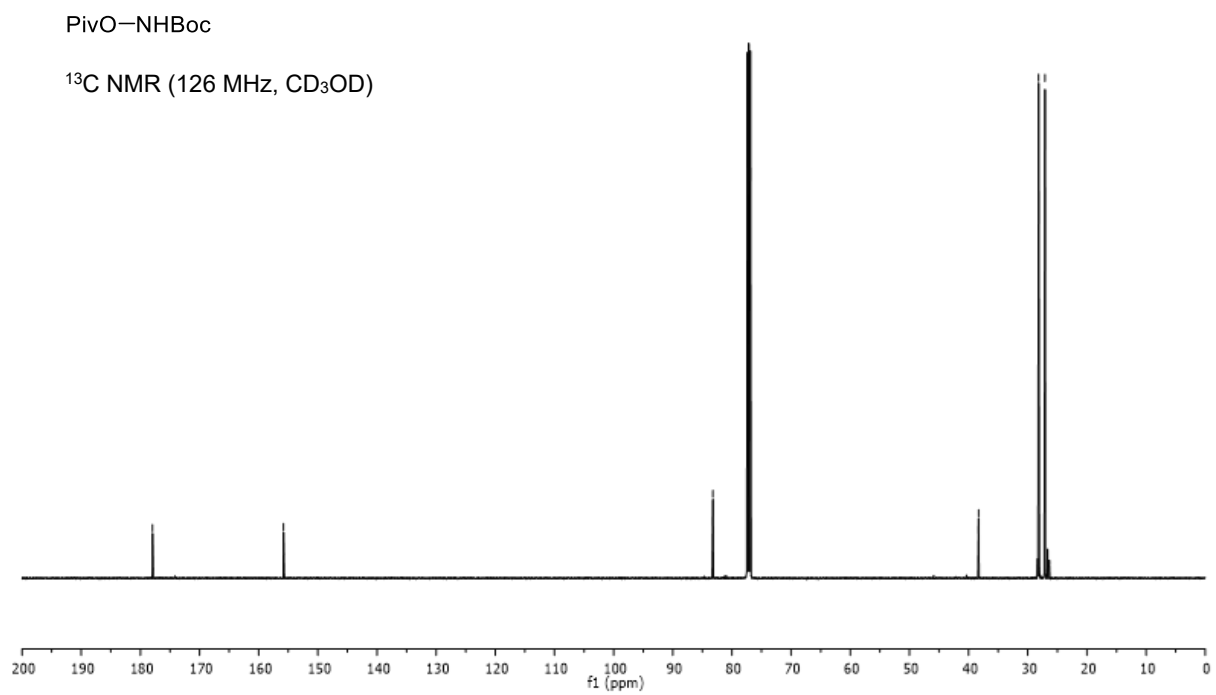

PivO—NH<sub>2</sub>•TfOH

**SI-1**

<sup>1</sup>H NMR (400 MHz, CD<sub>3</sub>OD)

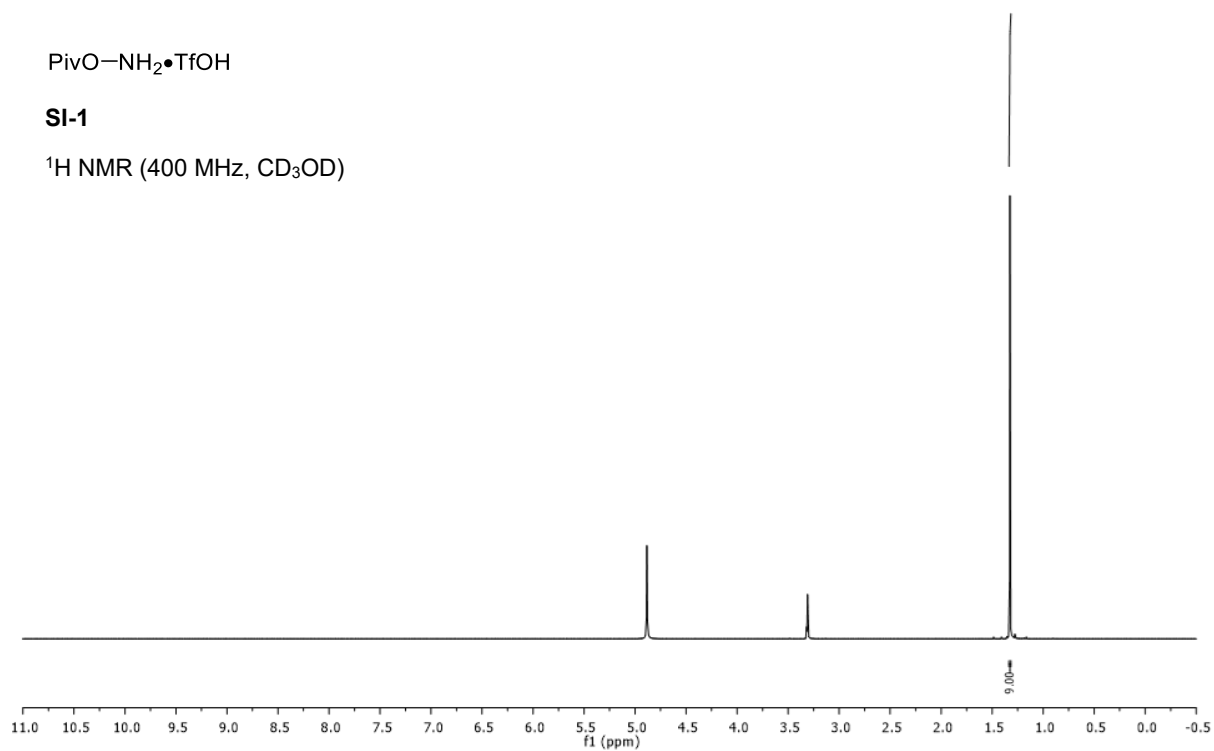

PivO—NH<sub>2</sub>•TfOH

**SI-1**

<sup>13</sup>C NMR (126 MHz, CD<sub>3</sub>OD)

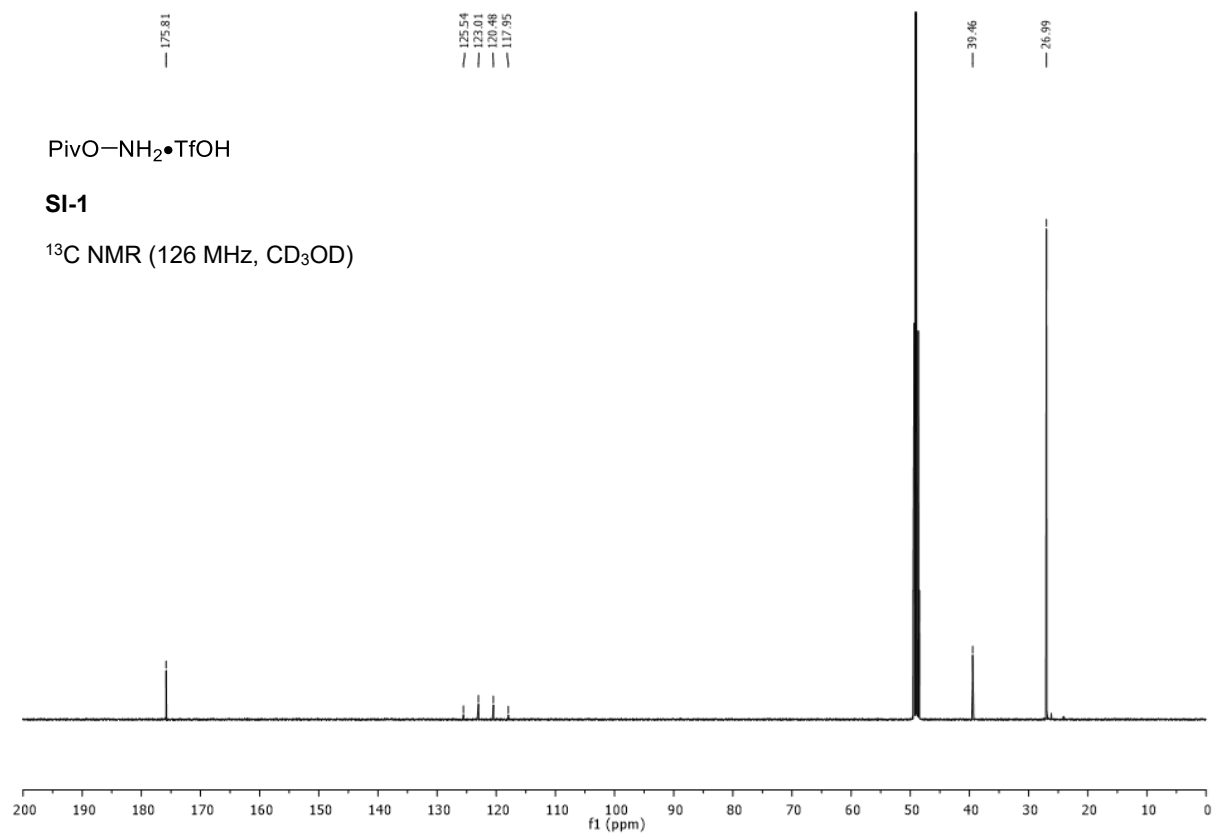

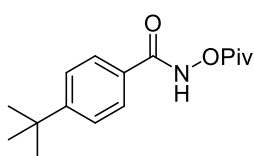

**S1\_1-Hy**

$^1\text{H}$  NMR (500 MHz,  $\text{CD}_3\text{OD}$ )

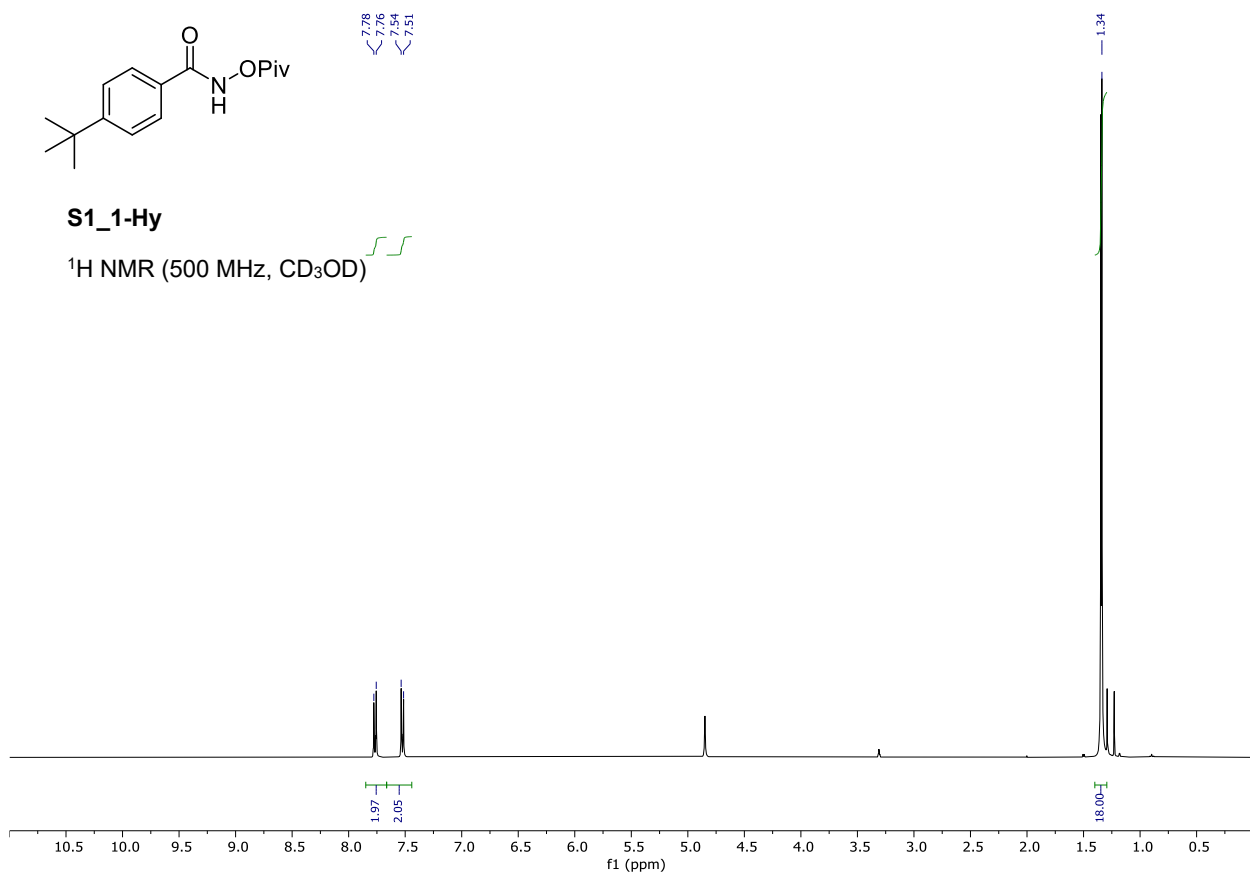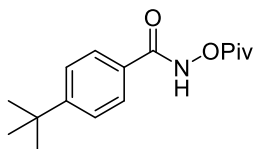

**S1\_1-Hy**

$^{13}\text{C}$  NMR (126 MHz,  $\text{CD}_3\text{OD}$ )

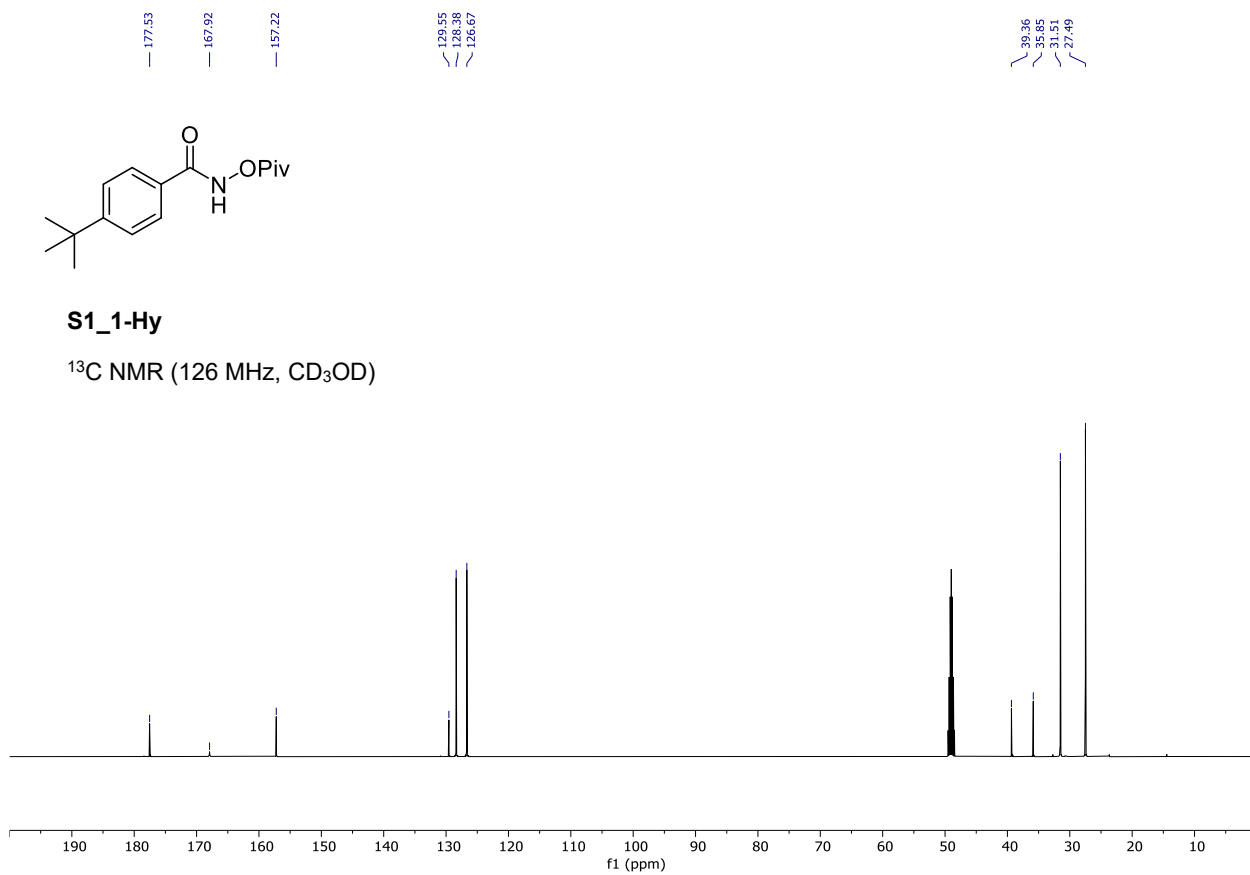



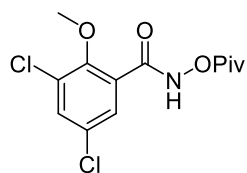

**S1\_2-Hy**

$^1\text{H}$  NMR (500 MHz,  $\text{CD}_3\text{OD}$ )

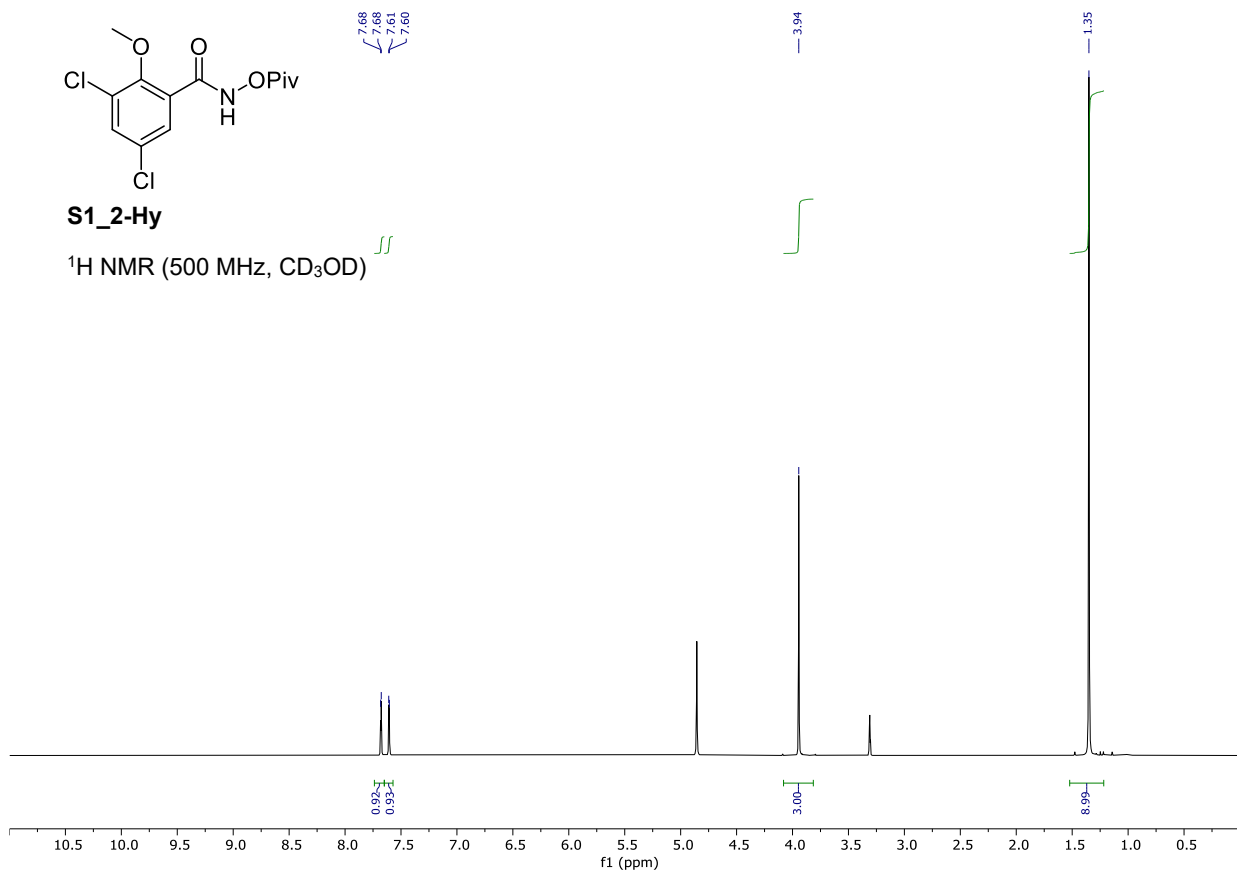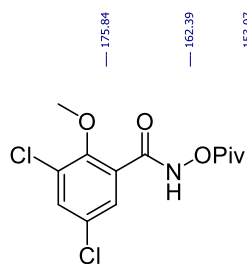

**S1\_2-Hy**

$^{13}\text{C}$  NMR (126 MHz,  $\text{CD}_3\text{OD}$ )

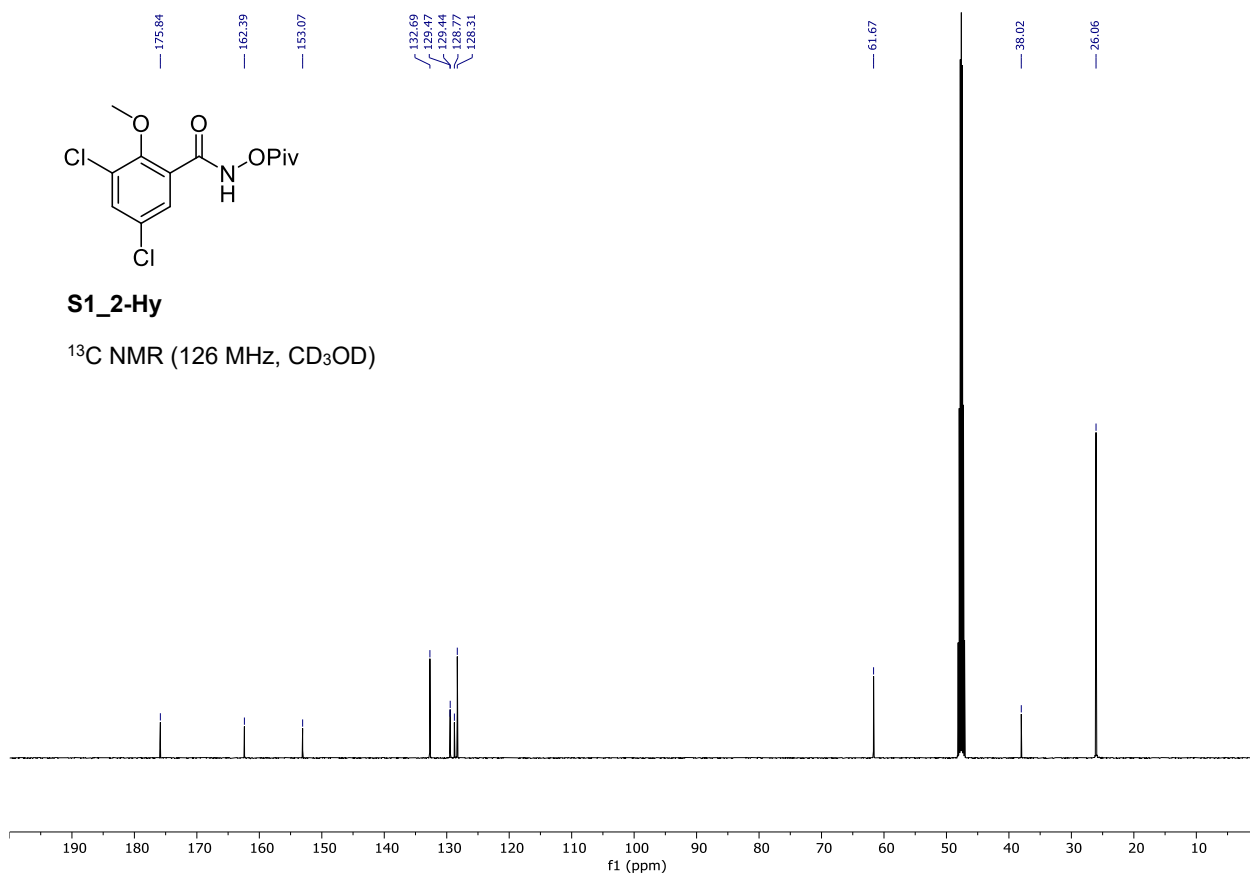

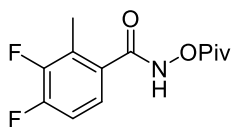

**S1\_3-Hy**

$^1\text{H}$  NMR (500 MHz,  $\text{CD}_3\text{OD}$ )

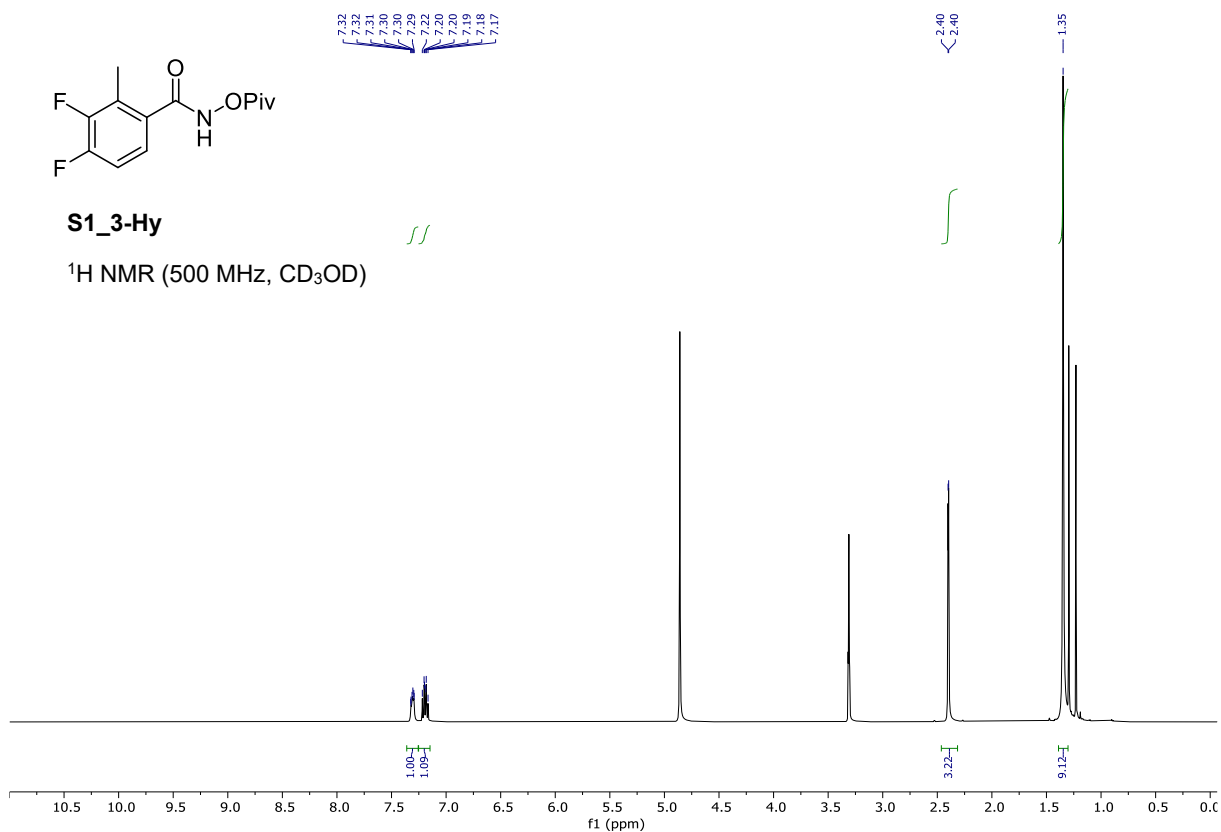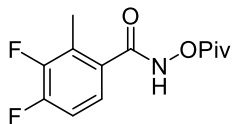

**S1\_3-Hy**

$^{13}\text{C}$  NMR (126 MHz,  $\text{CD}_3\text{OD}$ )

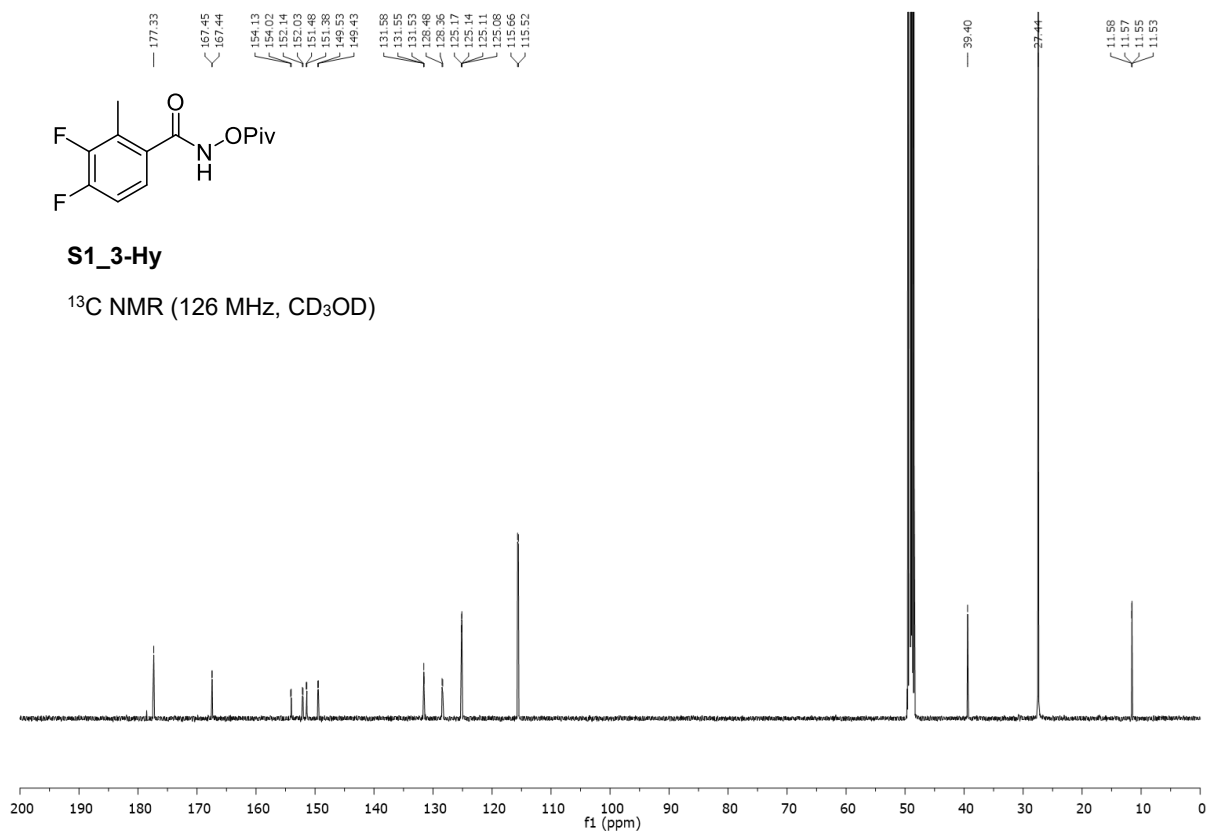

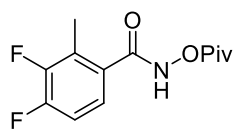

**S1\_3-Hy**

$^{19}\text{F}$  NMR (471 MHz,  $\text{CD}_3\text{OD}$ )

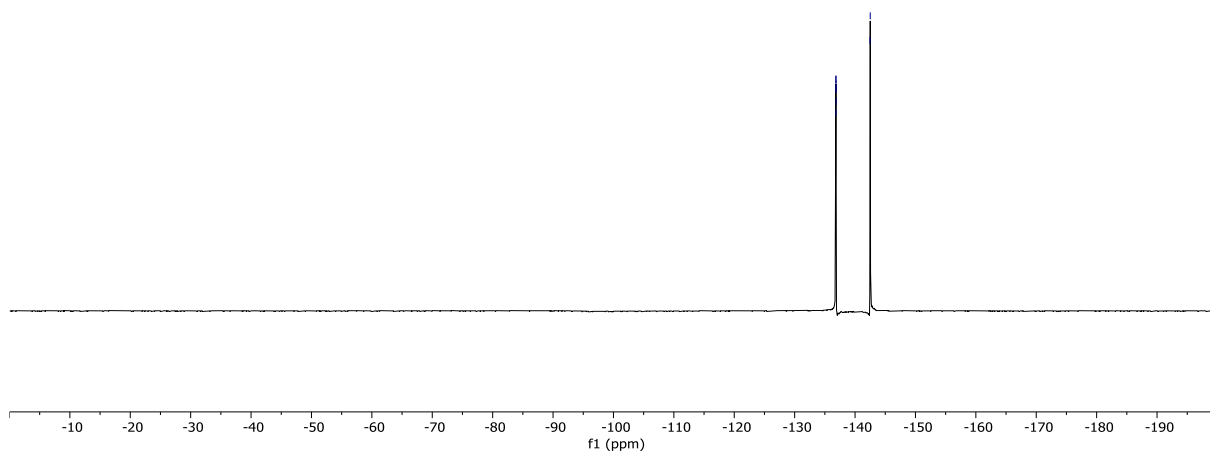

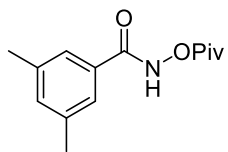

**S1\_4-Hy**

<sup>1</sup>H NMR (500 MHz, CD<sub>3</sub>OD)

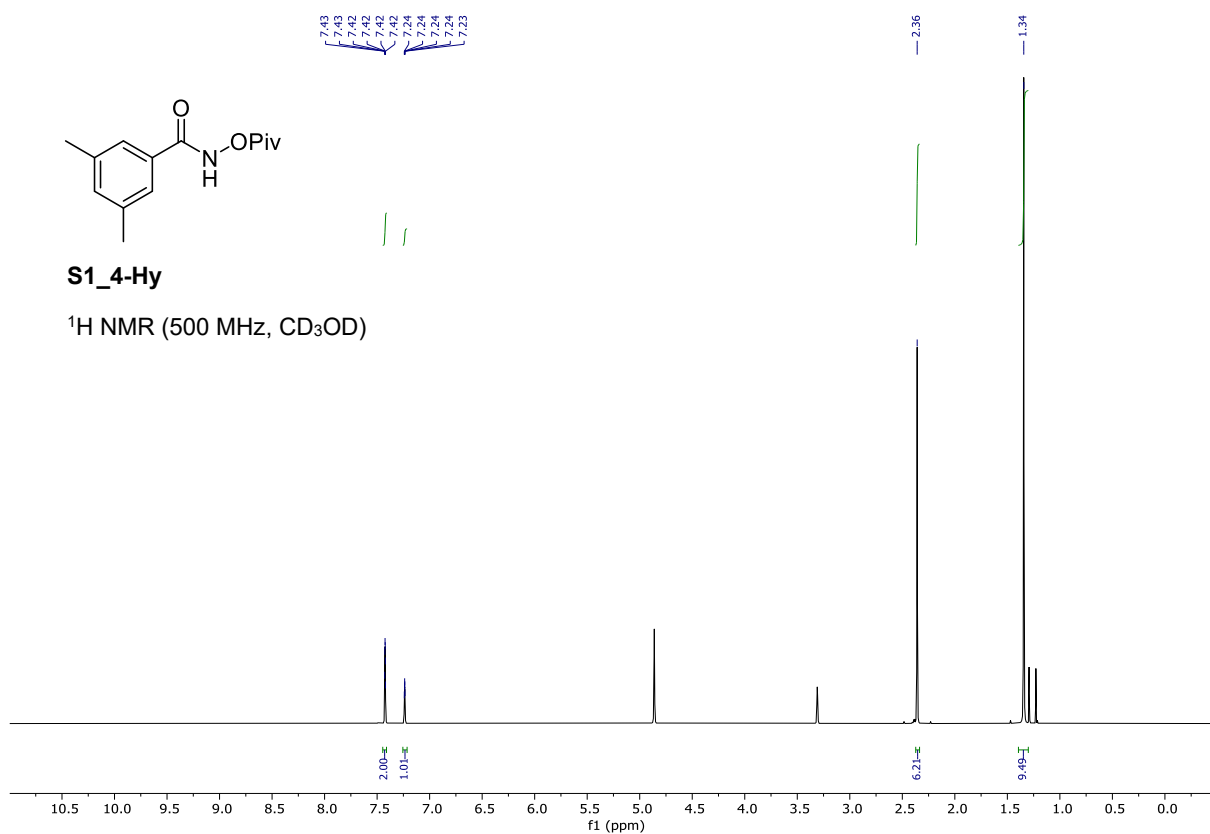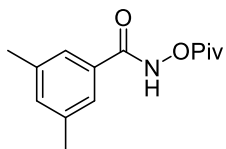

**S1\_4-Hy**

<sup>13</sup>C NMR (126 MHz, CD<sub>3</sub>OD)

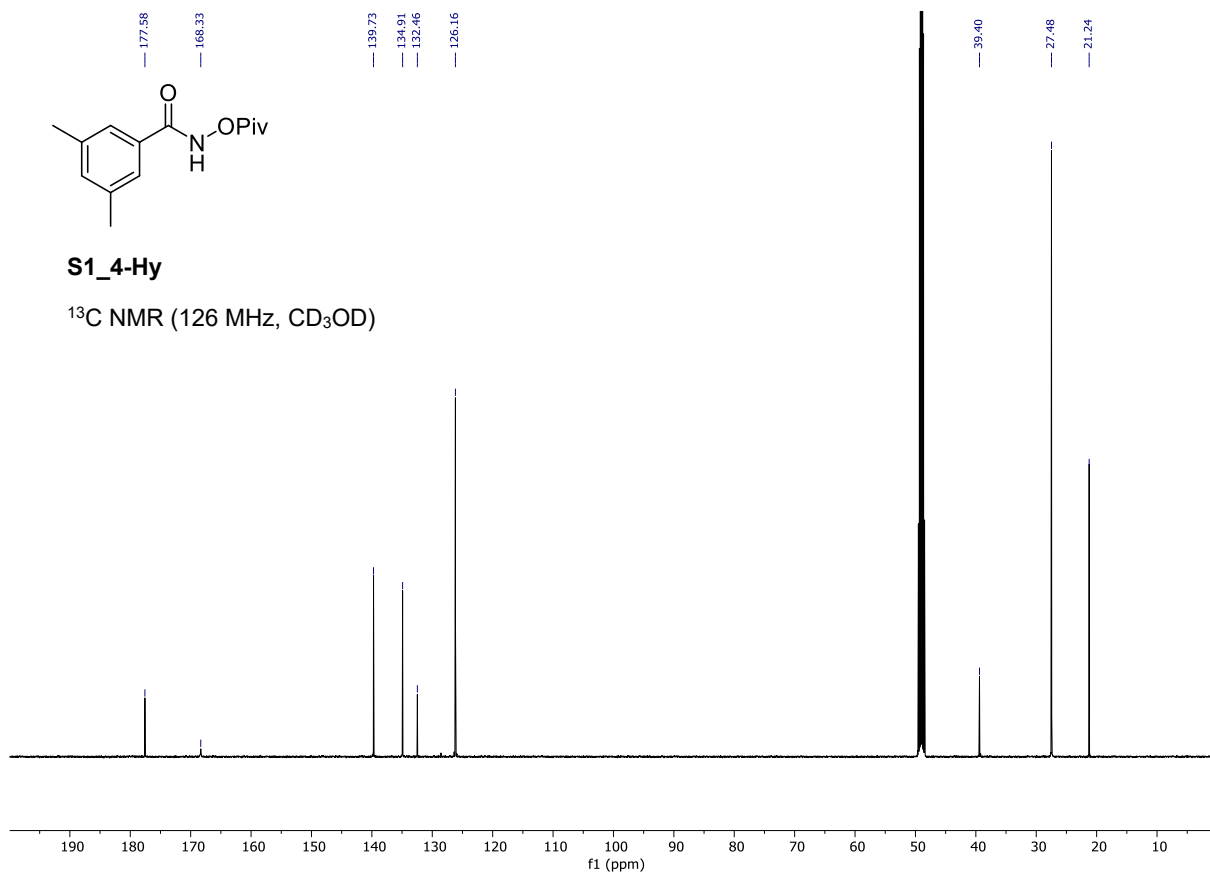

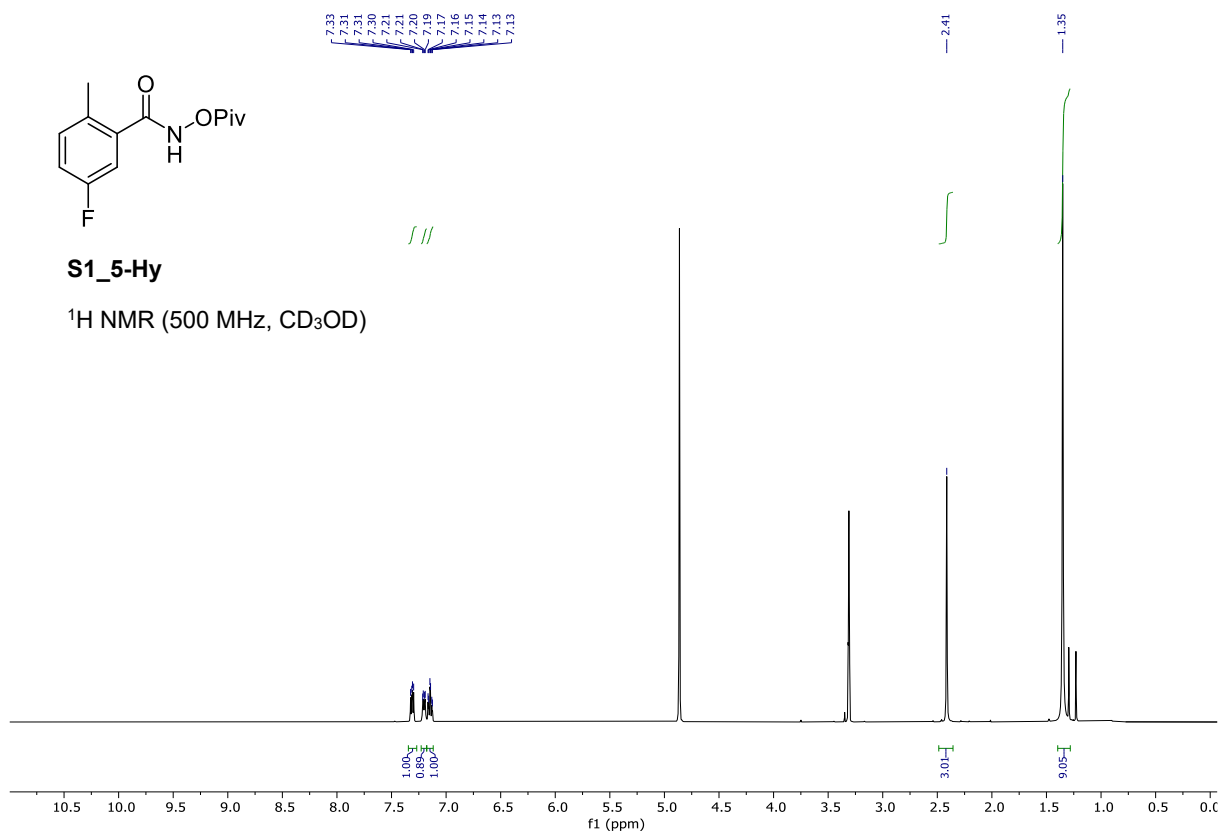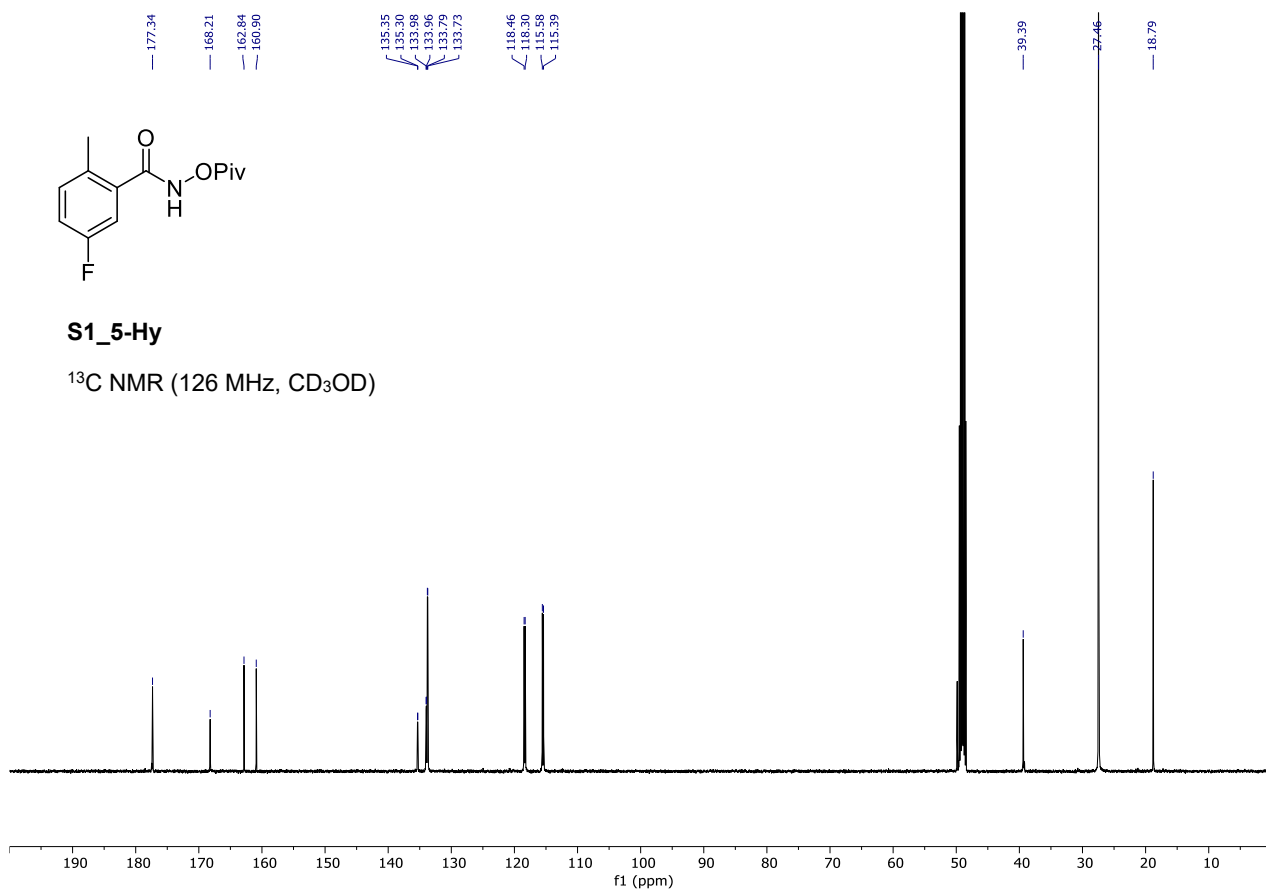

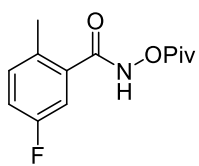

**S1\_5-Hy**

<sup>19</sup>F NMR (471 MHz, CD<sub>3</sub>OD)

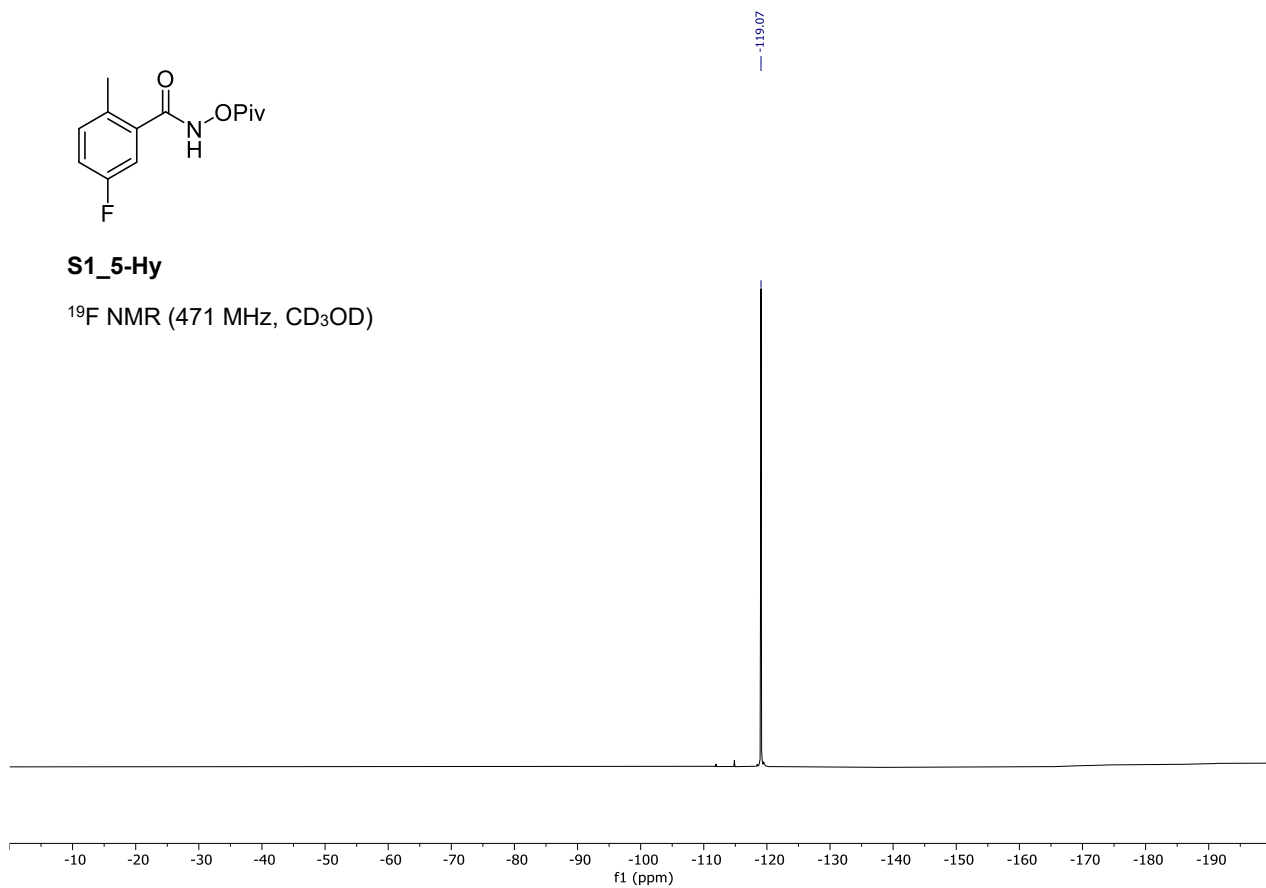

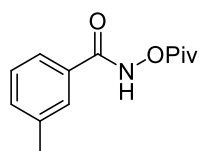

7.65  
7.64  
7.64  
7.64  
7.61  
7.60  
7.41  
7.41  
7.40  
7.38  
7.37

**S1\_6-Hy**

$^1\text{H}$  NMR (500 MHz,  $\text{CD}_3\text{OD}$ ) // //

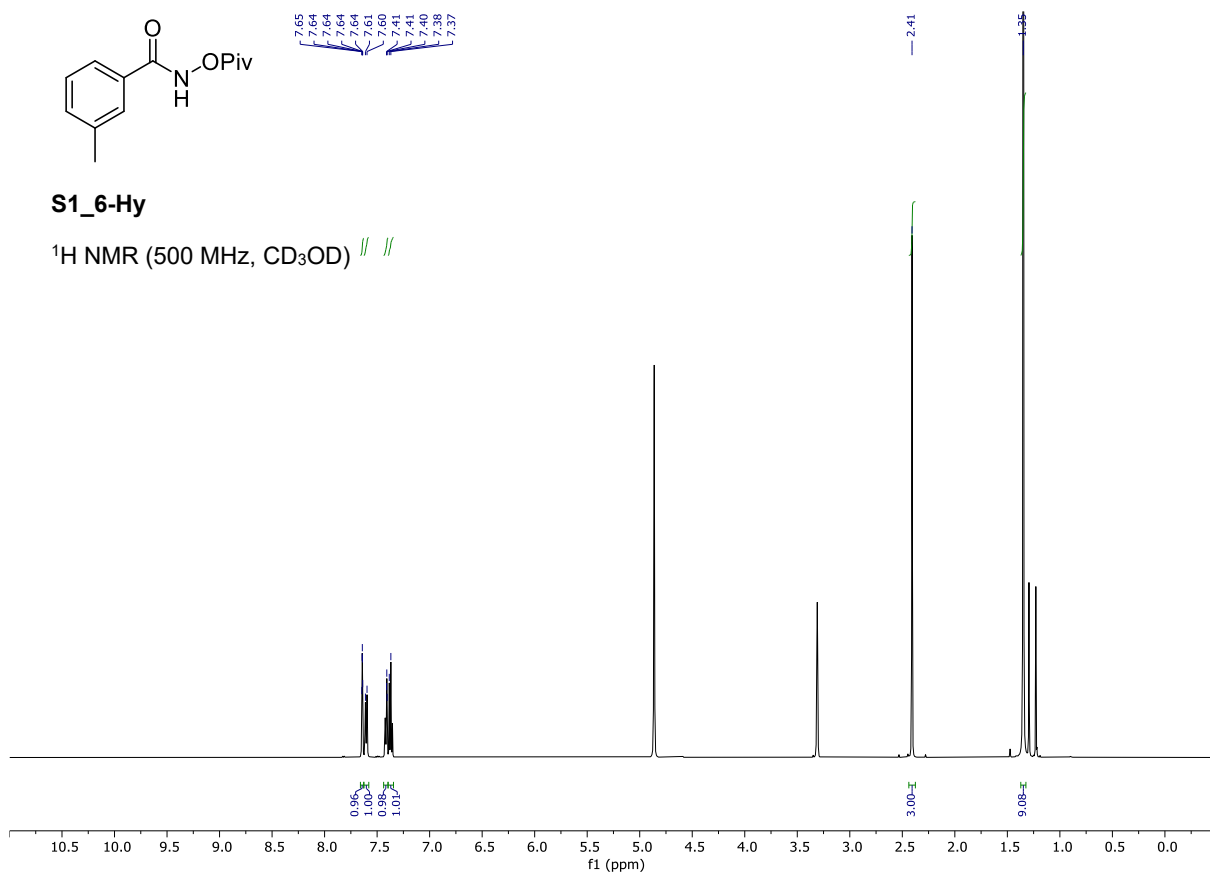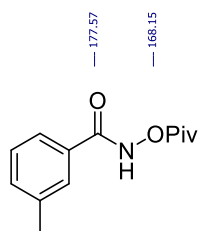

177.57

168.15

139.88

134.16

132.53

128.68

128.98

125.62

**S1\_6-Hy**

$^{13}\text{C}$  NMR (126 MHz,  $\text{CD}_3\text{OD}$ )

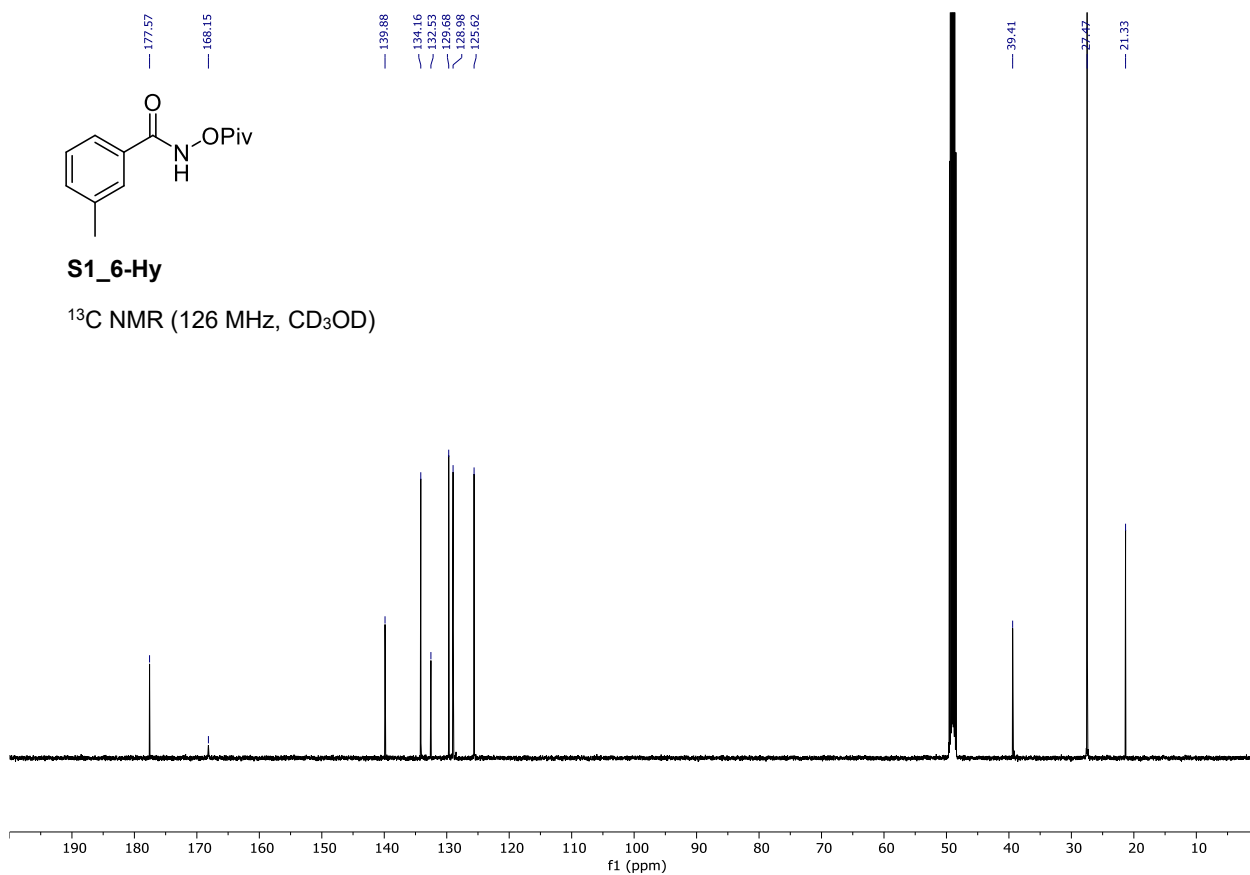

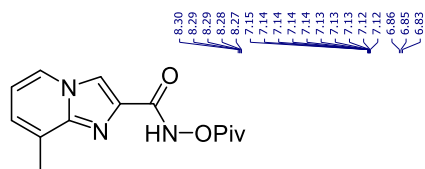

**S1\_7-Hy**

$^1\text{H}$  NMR (500 MHz,  $\text{CD}_3\text{OD}$ )

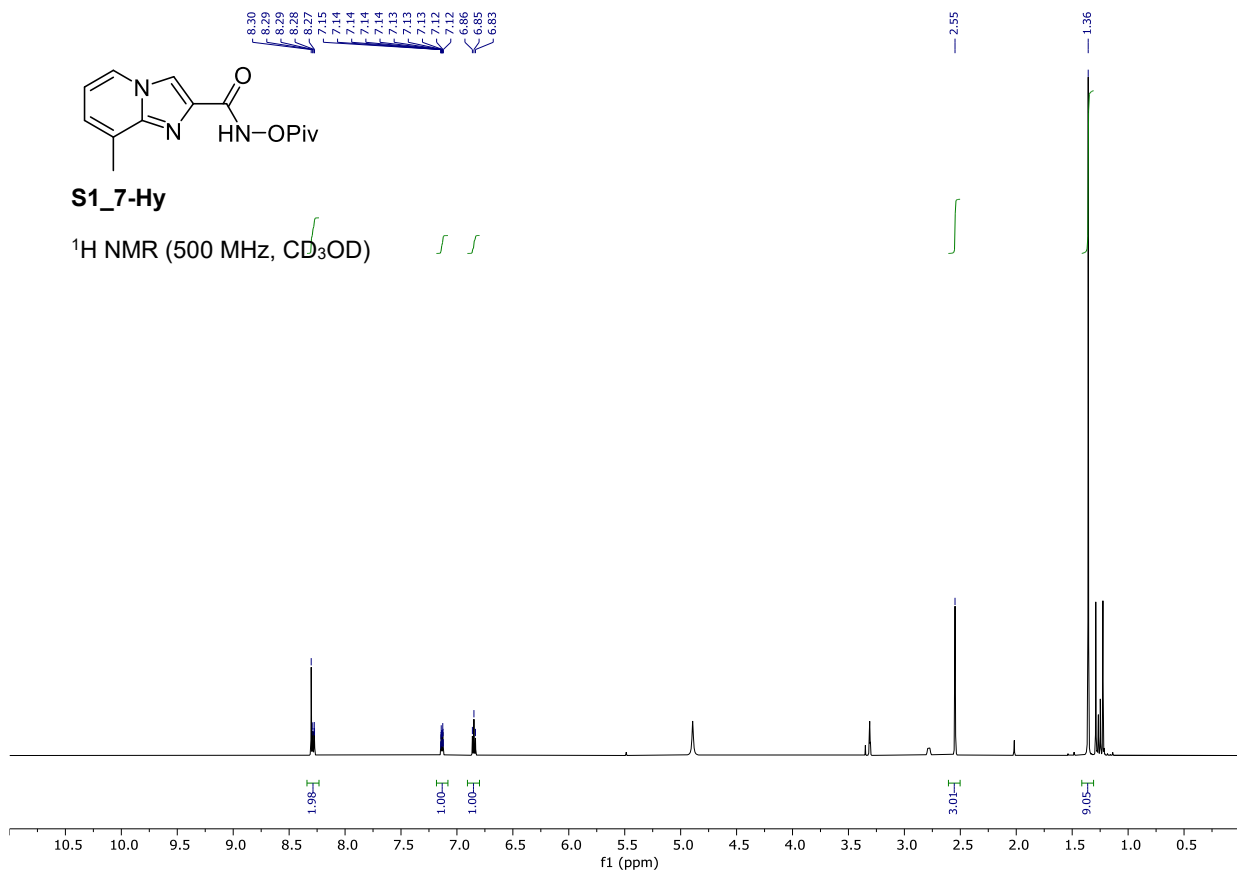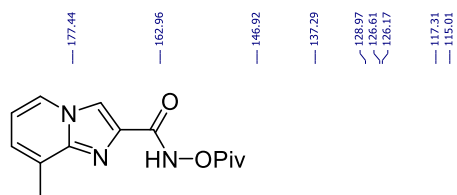

**S1\_7-Hy**

$^{13}\text{C}$  NMR (126 MHz,  $\text{CD}_3\text{OD}$ )

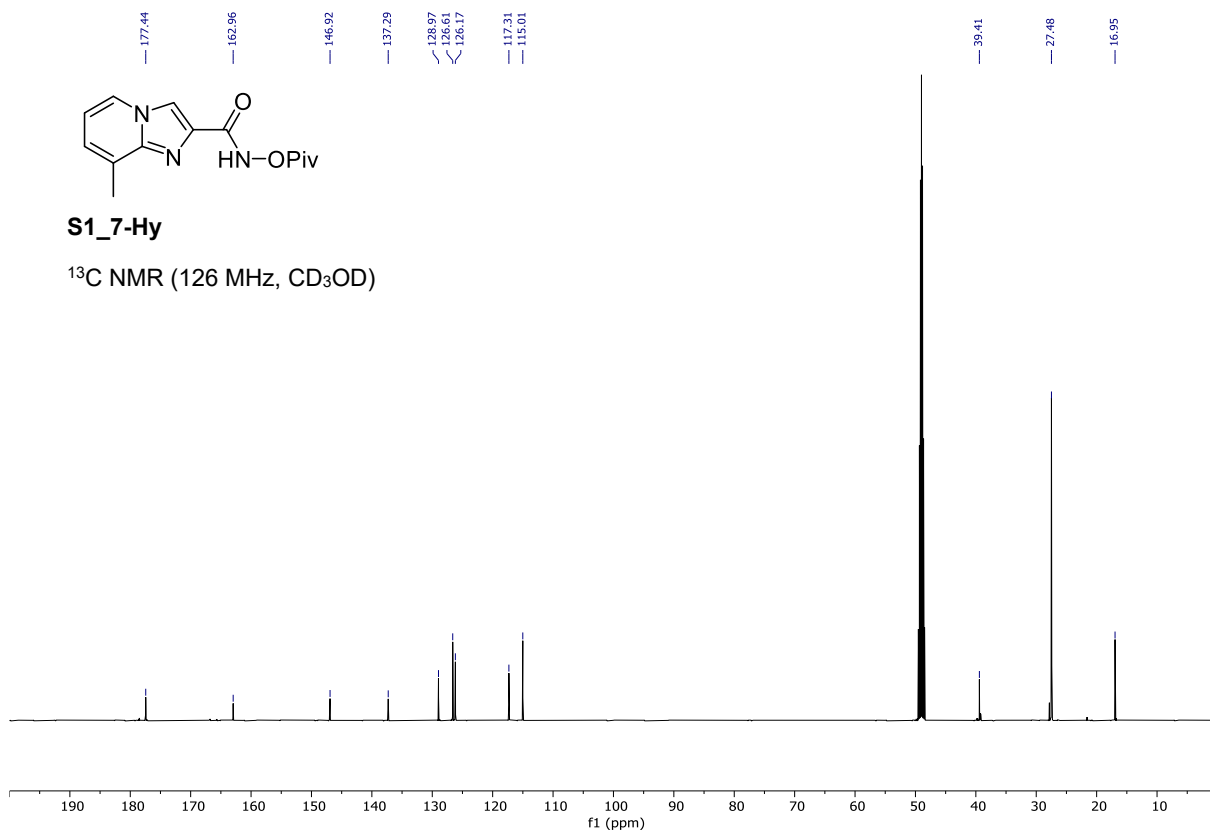



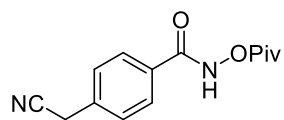

**S1\_8-Hy**

$^1\text{H}$  NMR (500 MHz,  $\text{CD}_3\text{OD}$ )

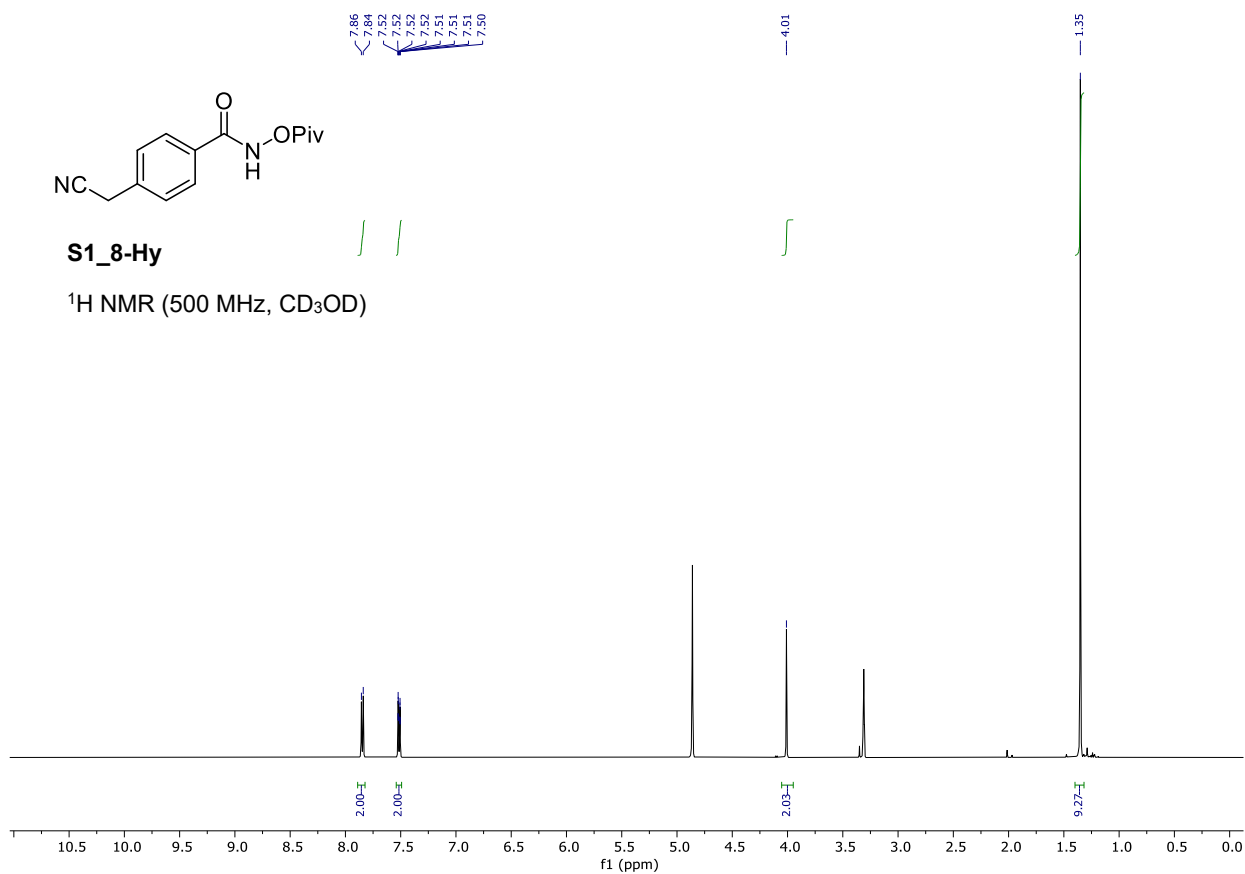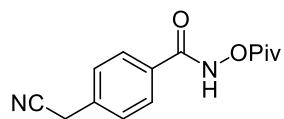

**S1\_8-Hy**

$^{13}\text{C}$  NMR (126 MHz,  $\text{CD}_3\text{OD}$ )

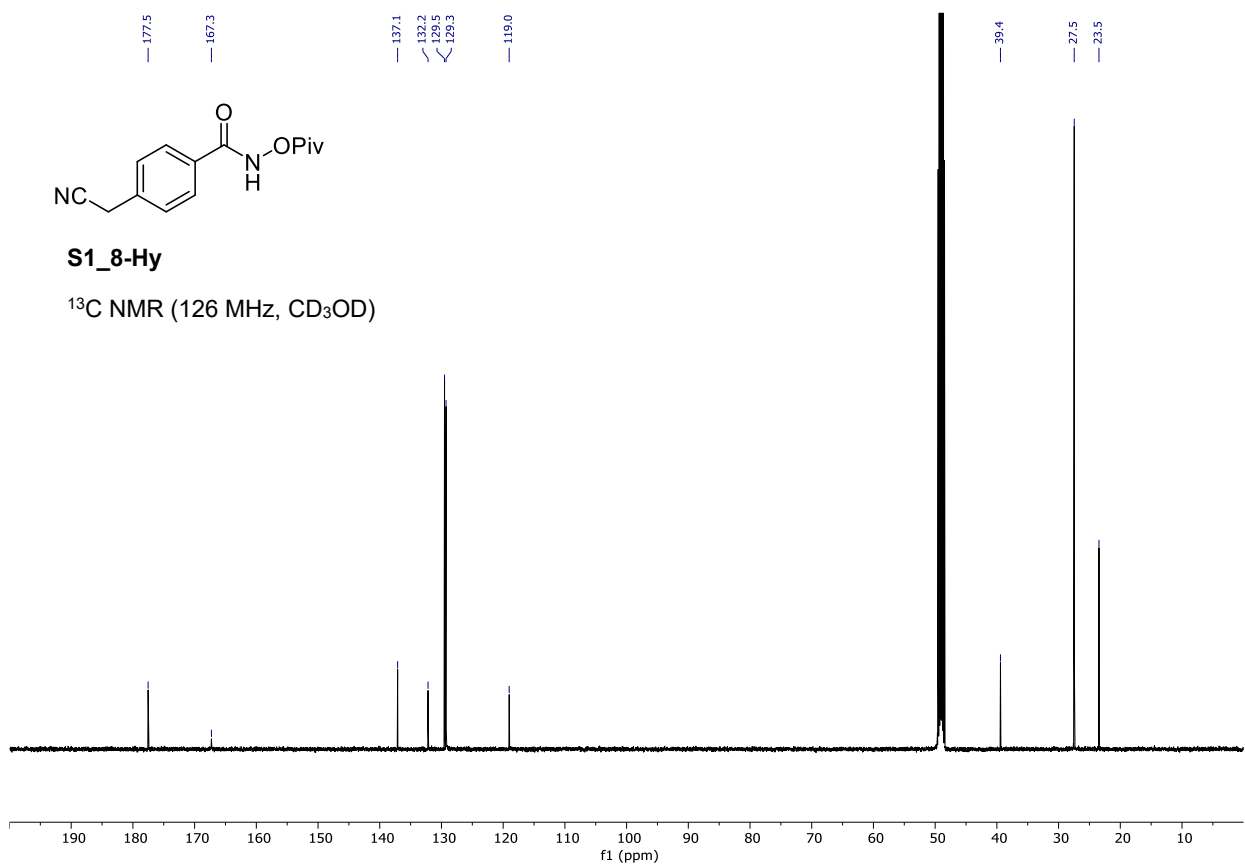

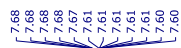

II

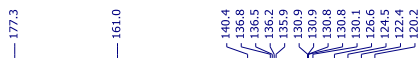

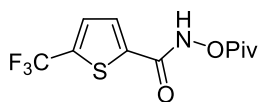

**S1\_9-Hy**

<sup>19</sup>F NMR (376 MHz, CD<sub>3</sub>OD)

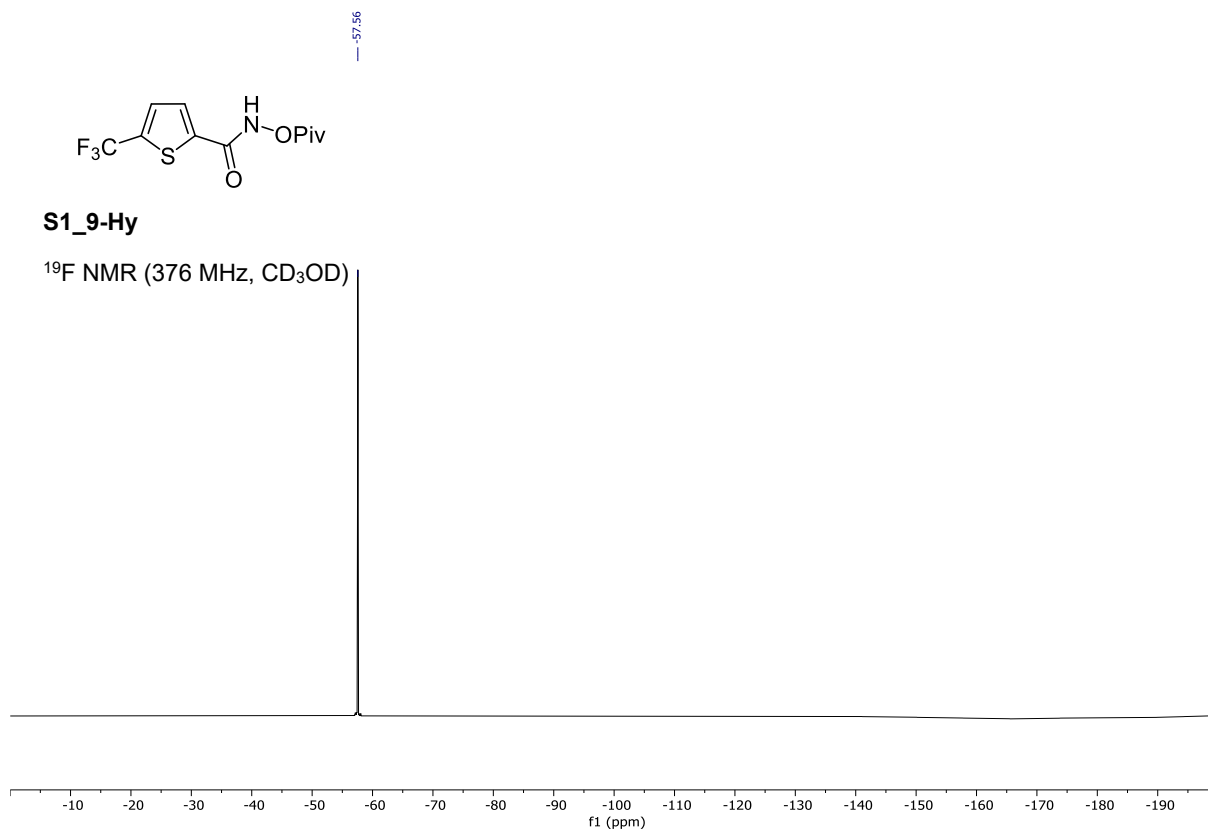

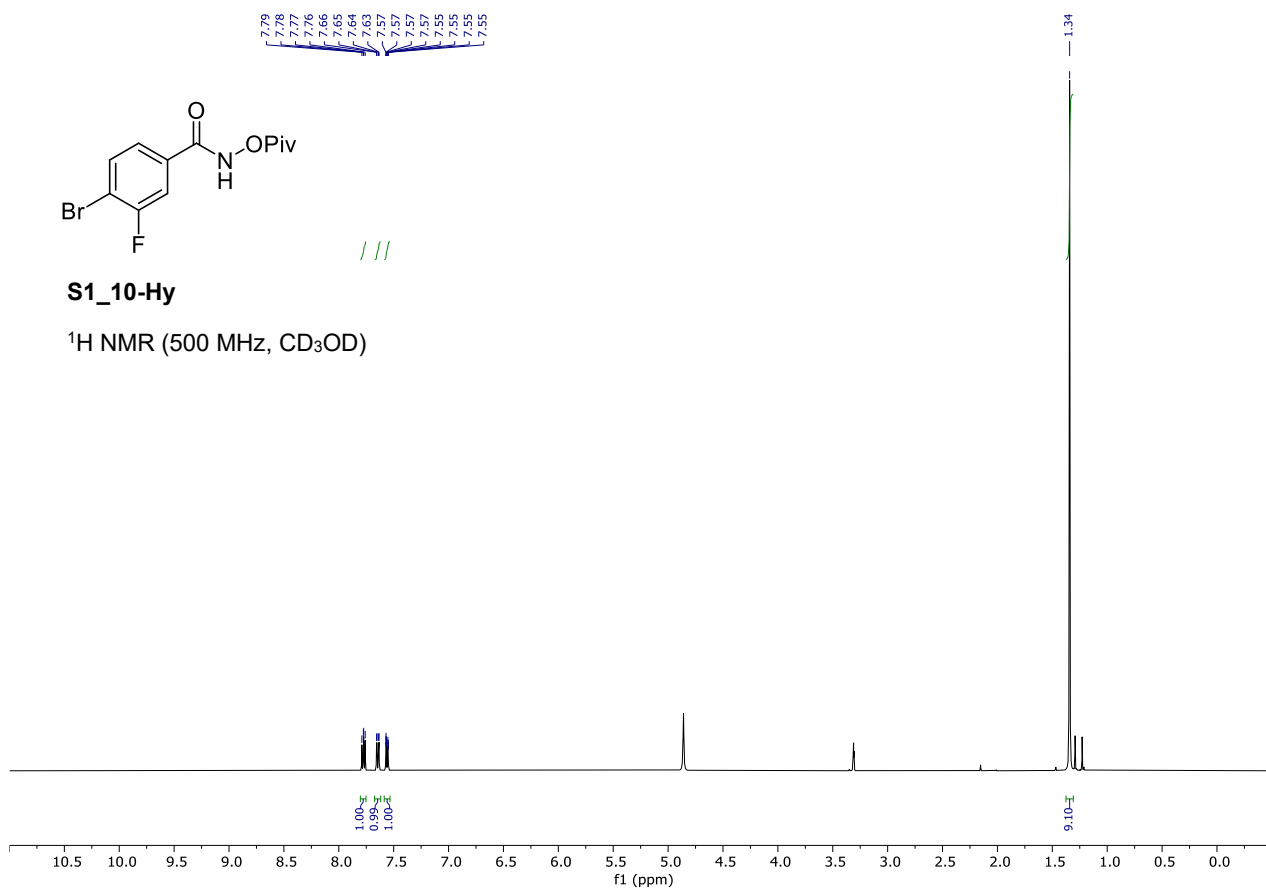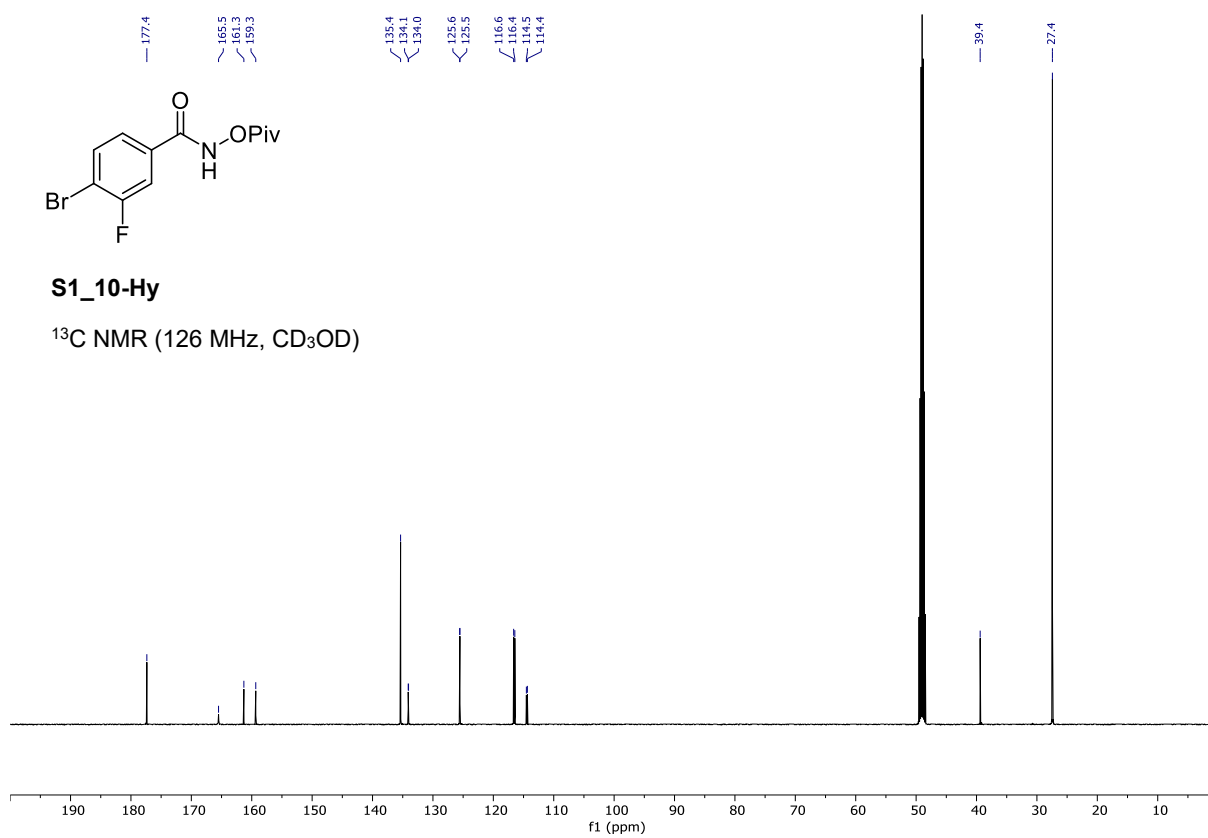

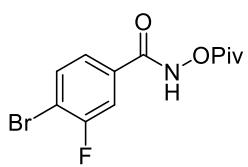

**S1\_10-Hy**

$^{19}\text{F}$  NMR (376 MHz,  $\text{CD}_3\text{OD}$ )

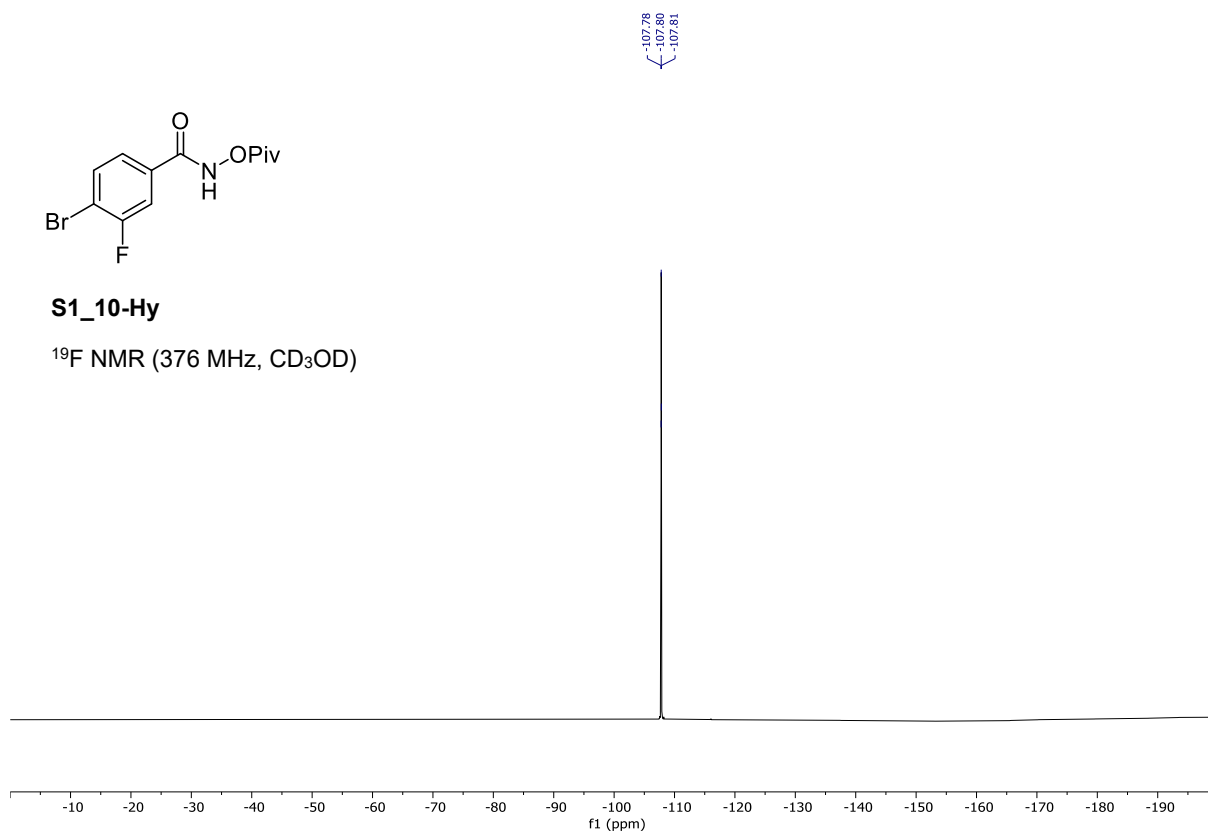



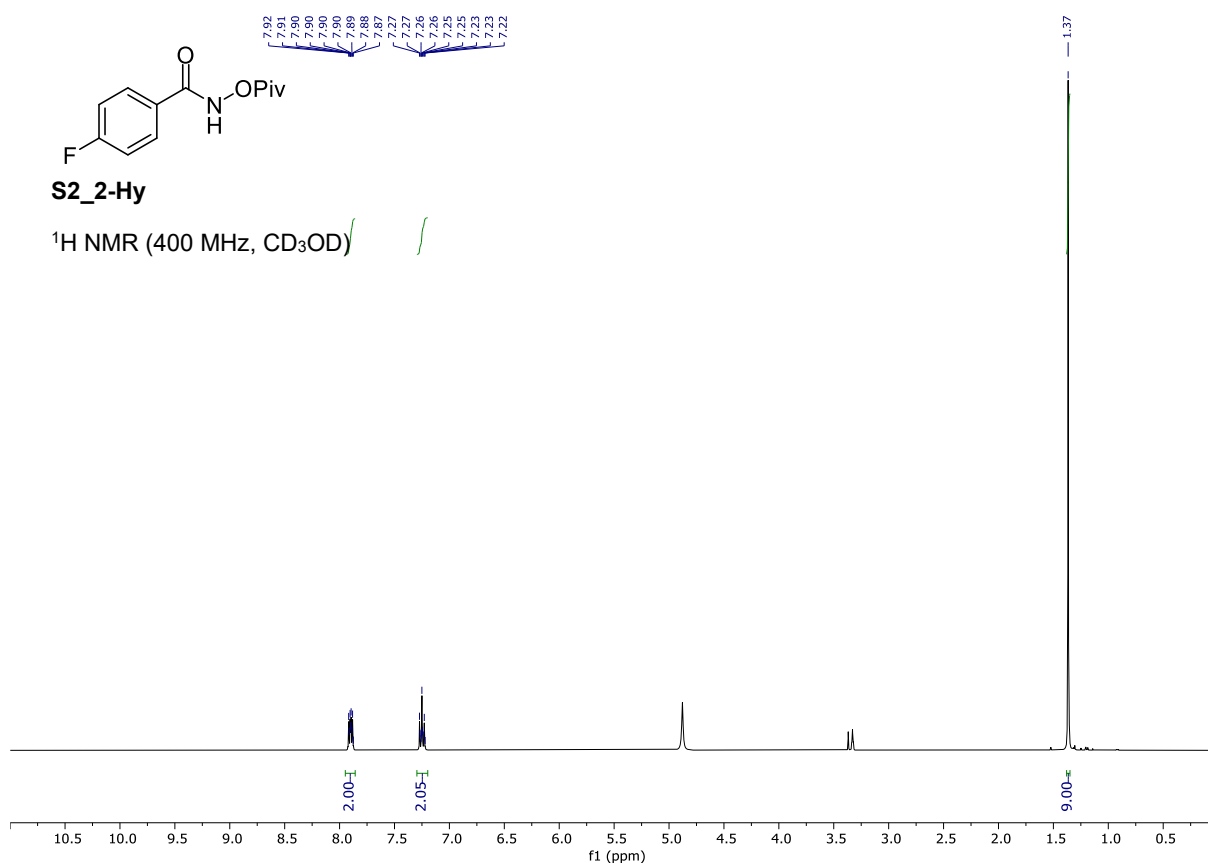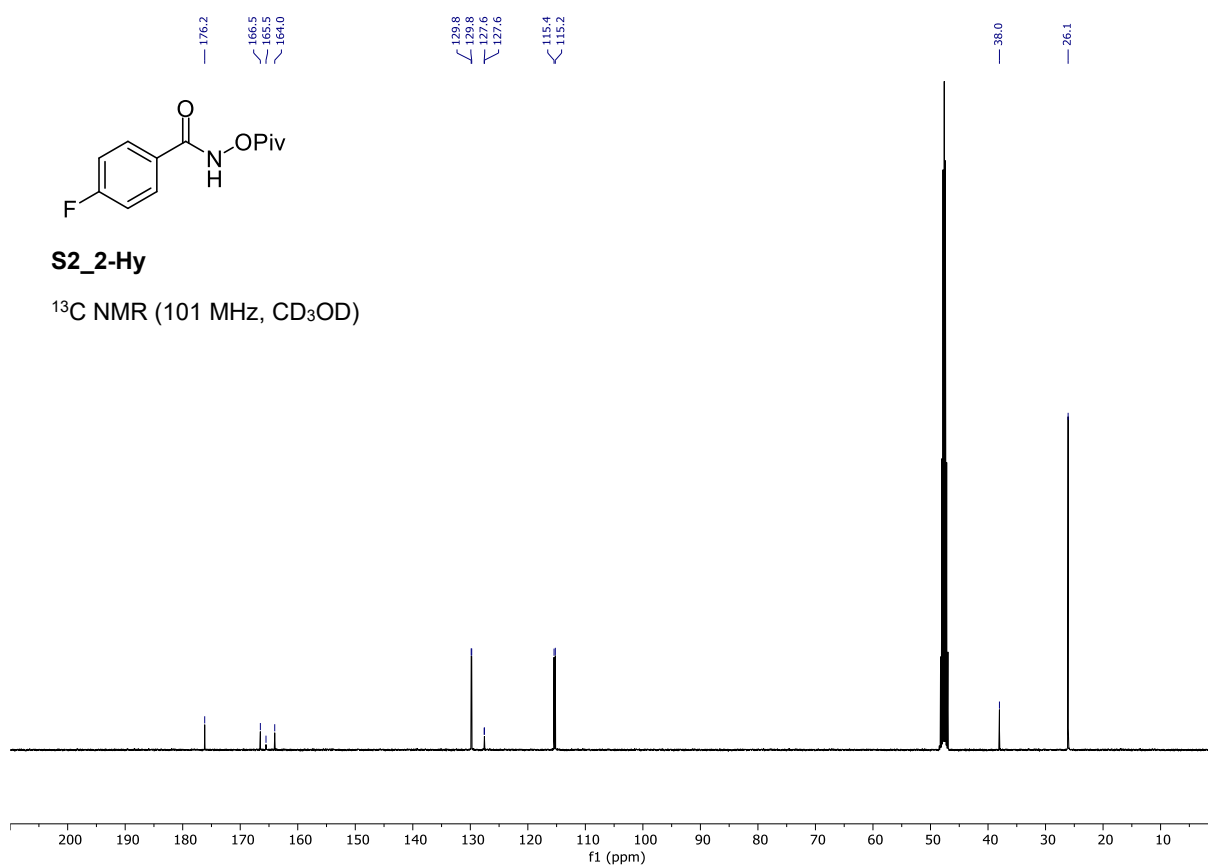

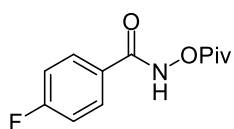

**S2\_2-Hy**

$^{19}\text{F}$  NMR (376 MHz,  $\text{CD}_3\text{OD}$ )

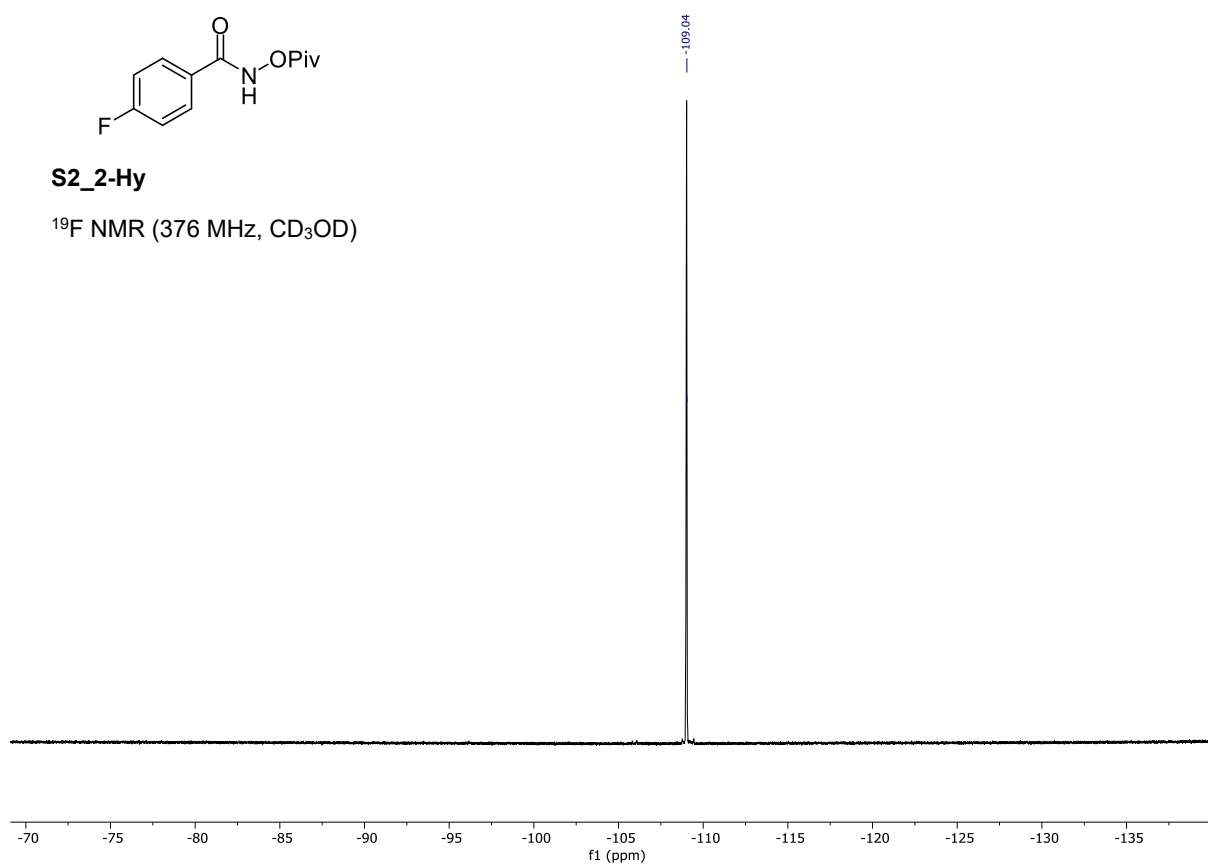



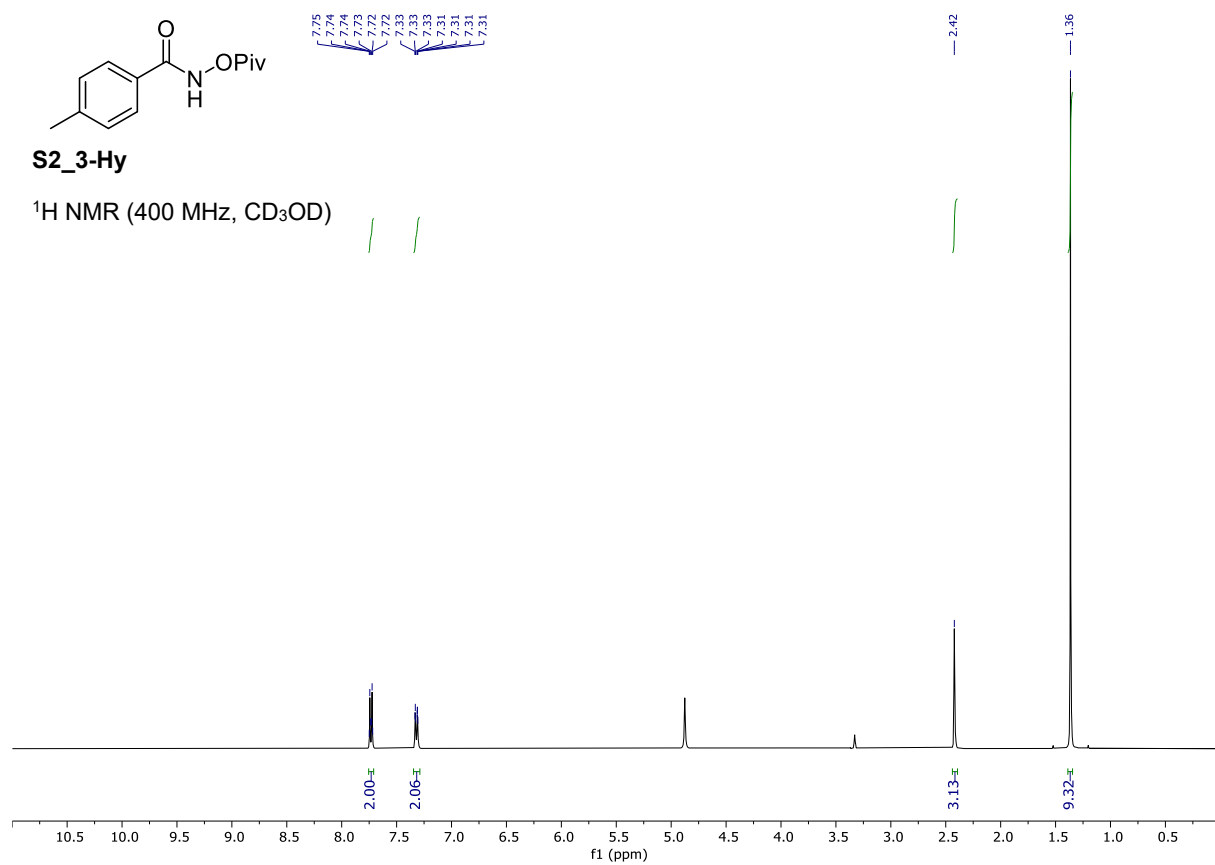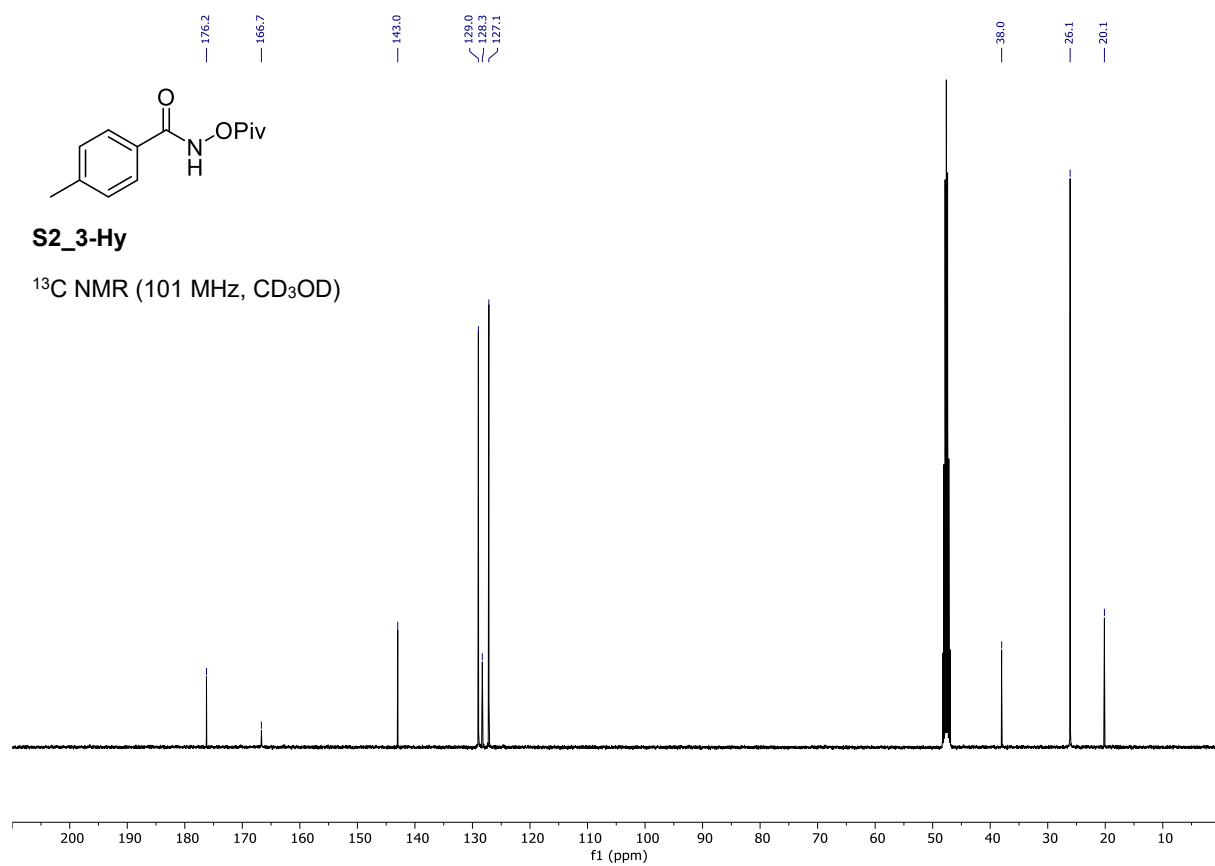

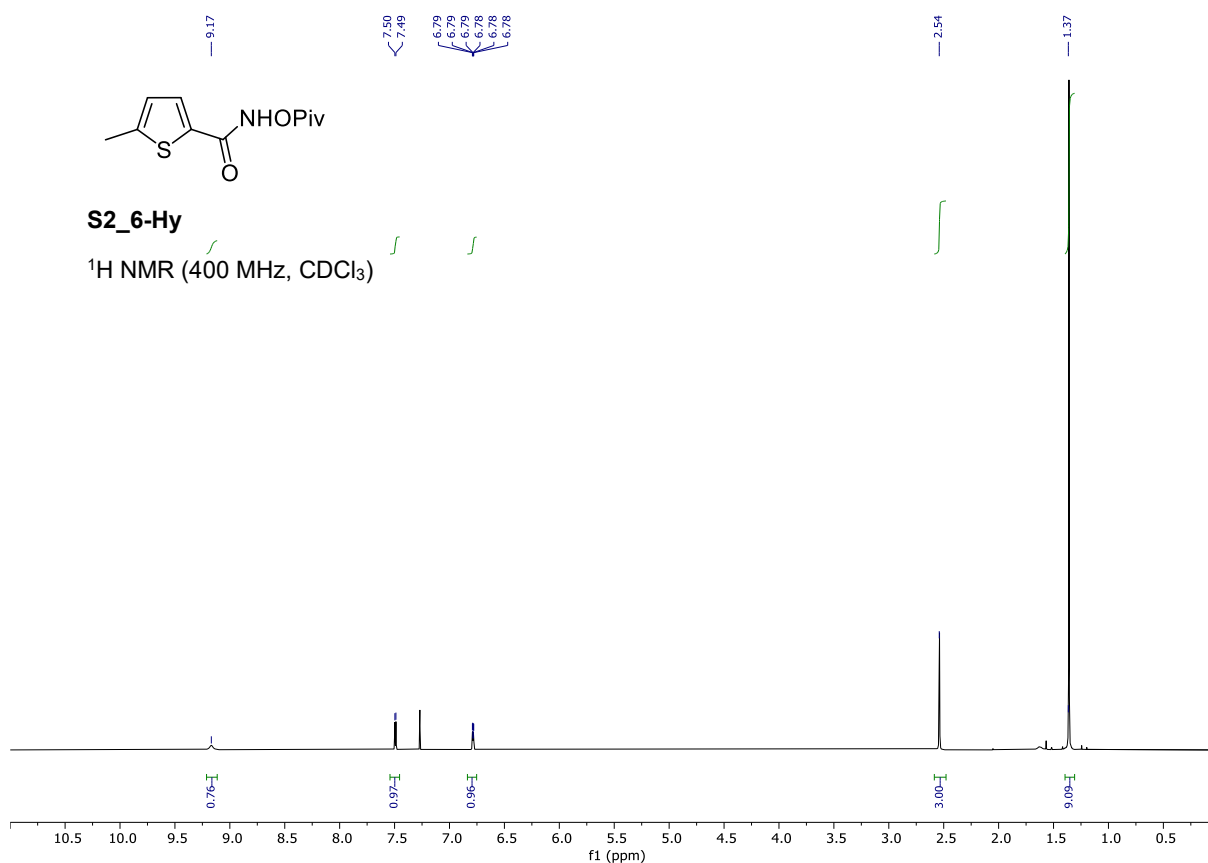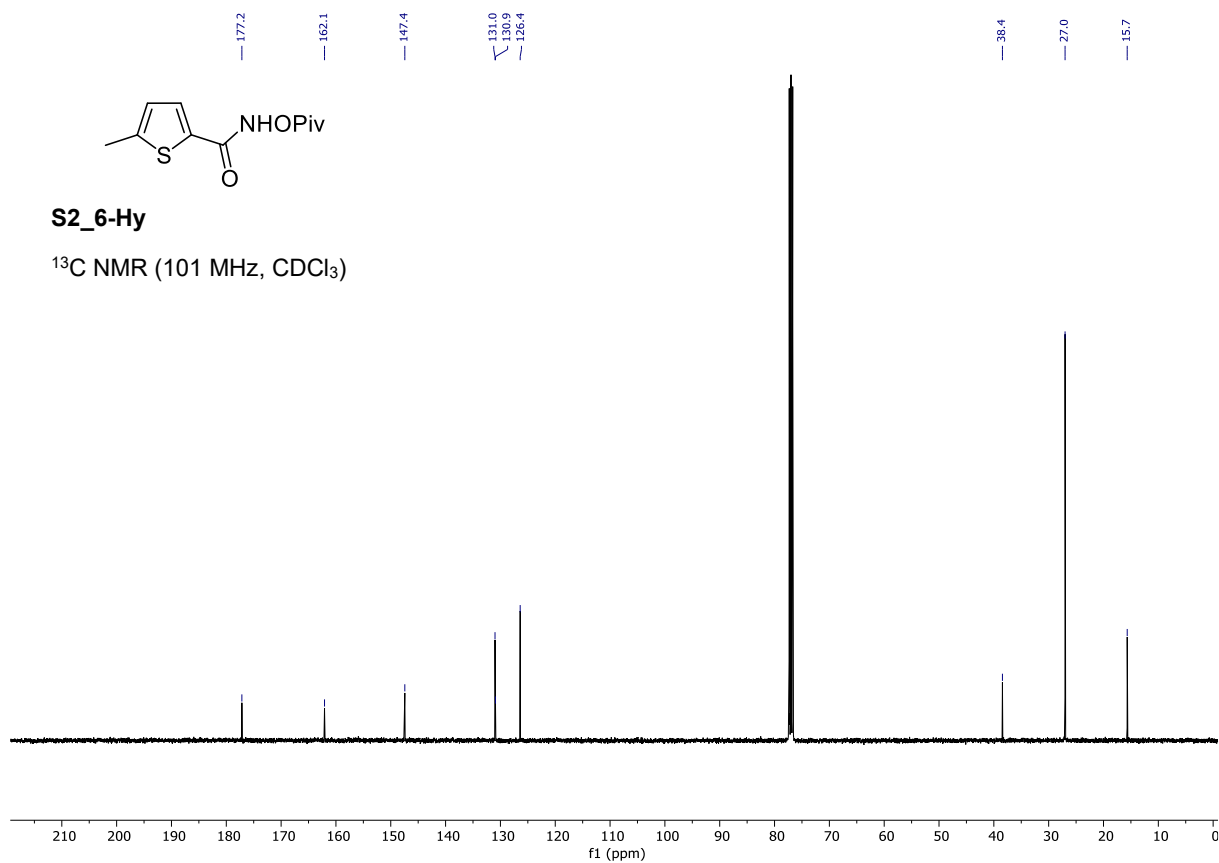

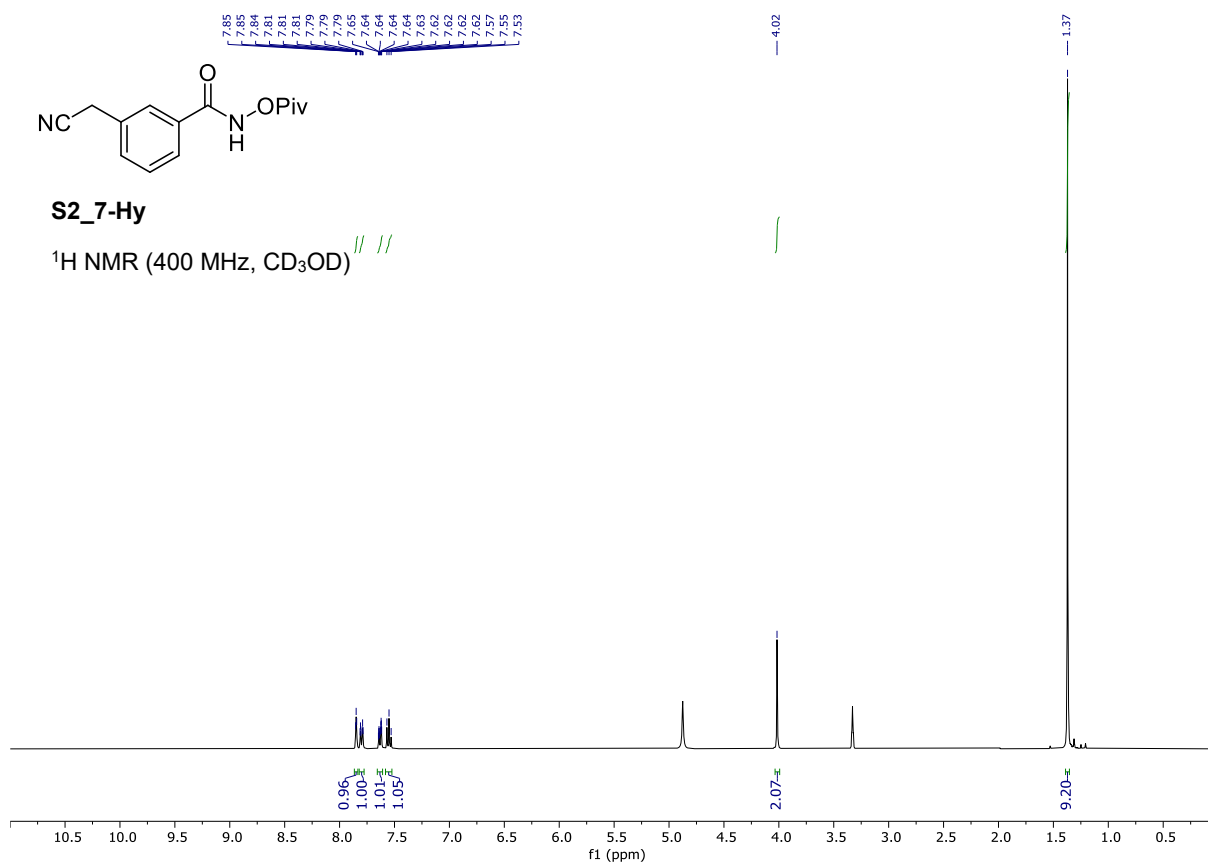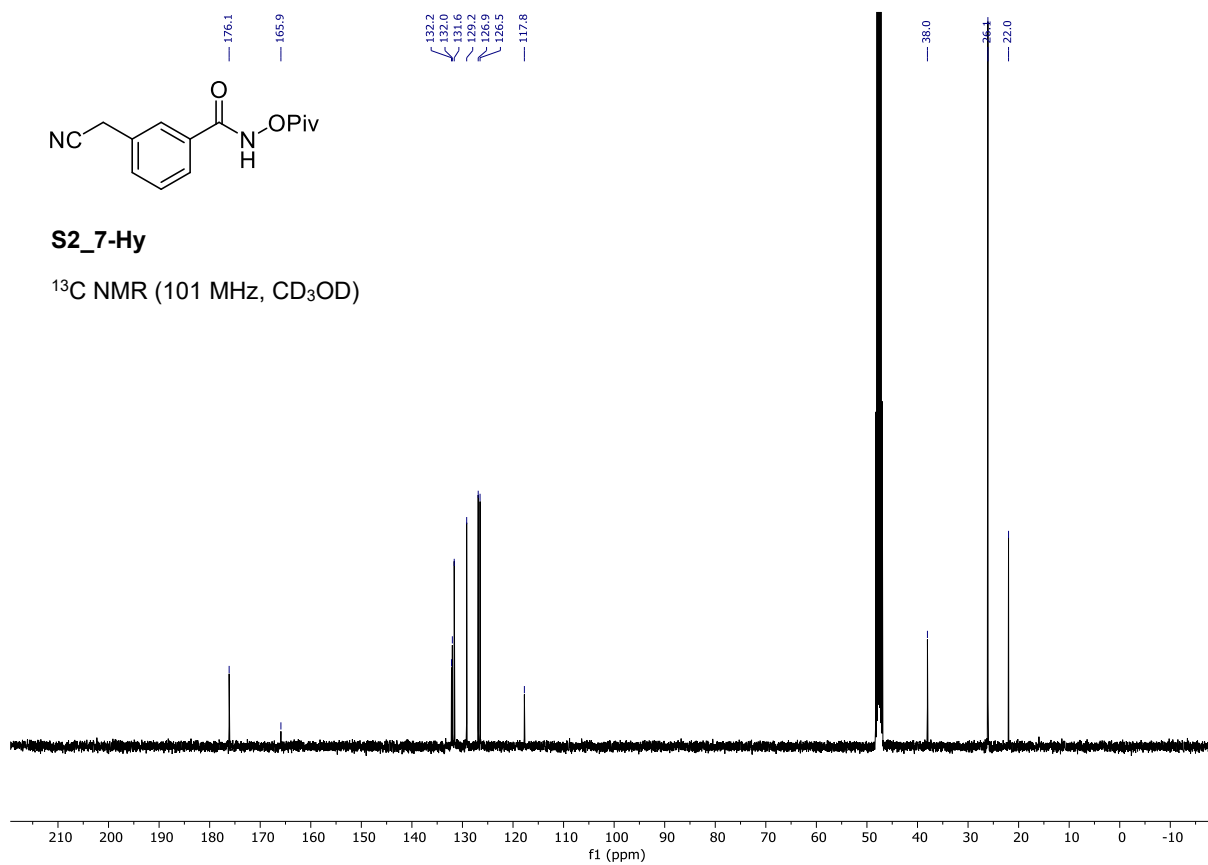

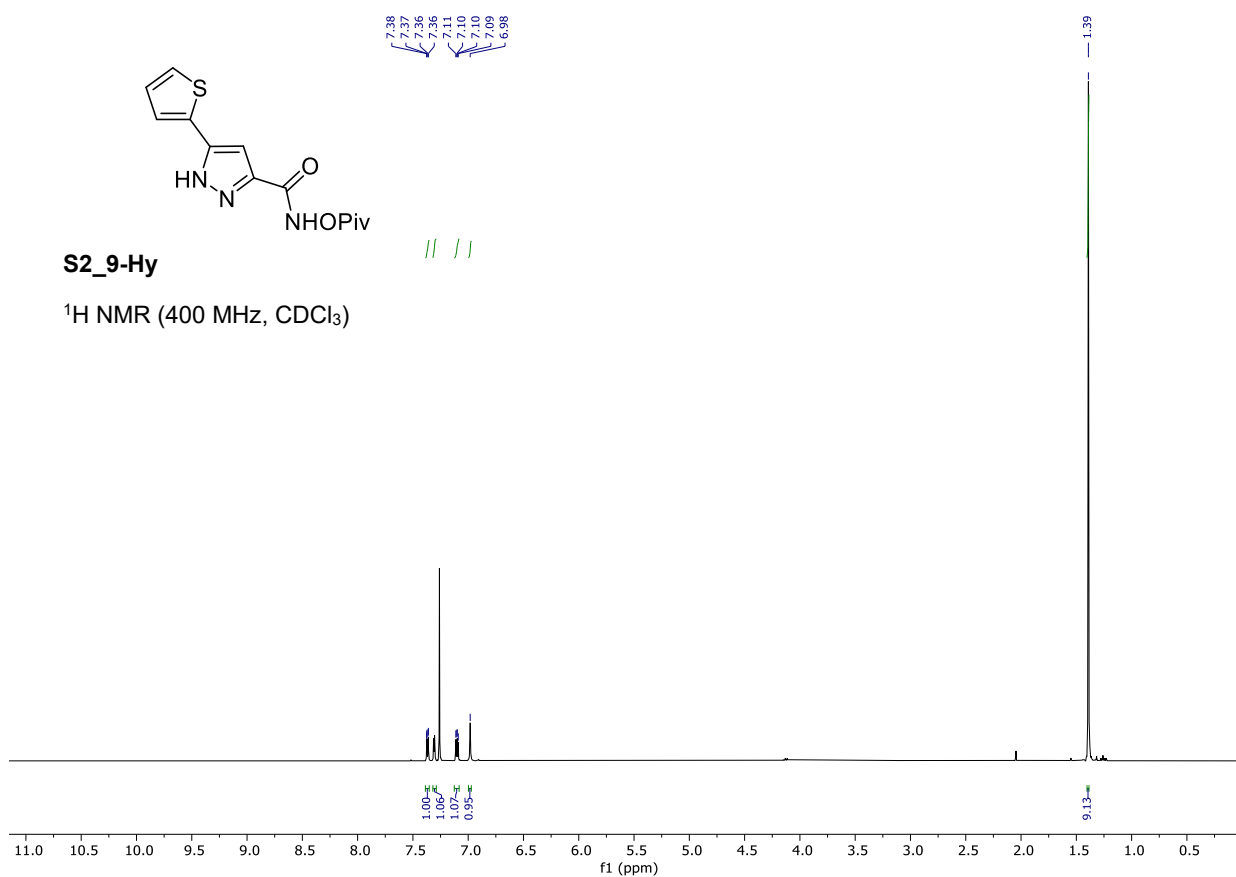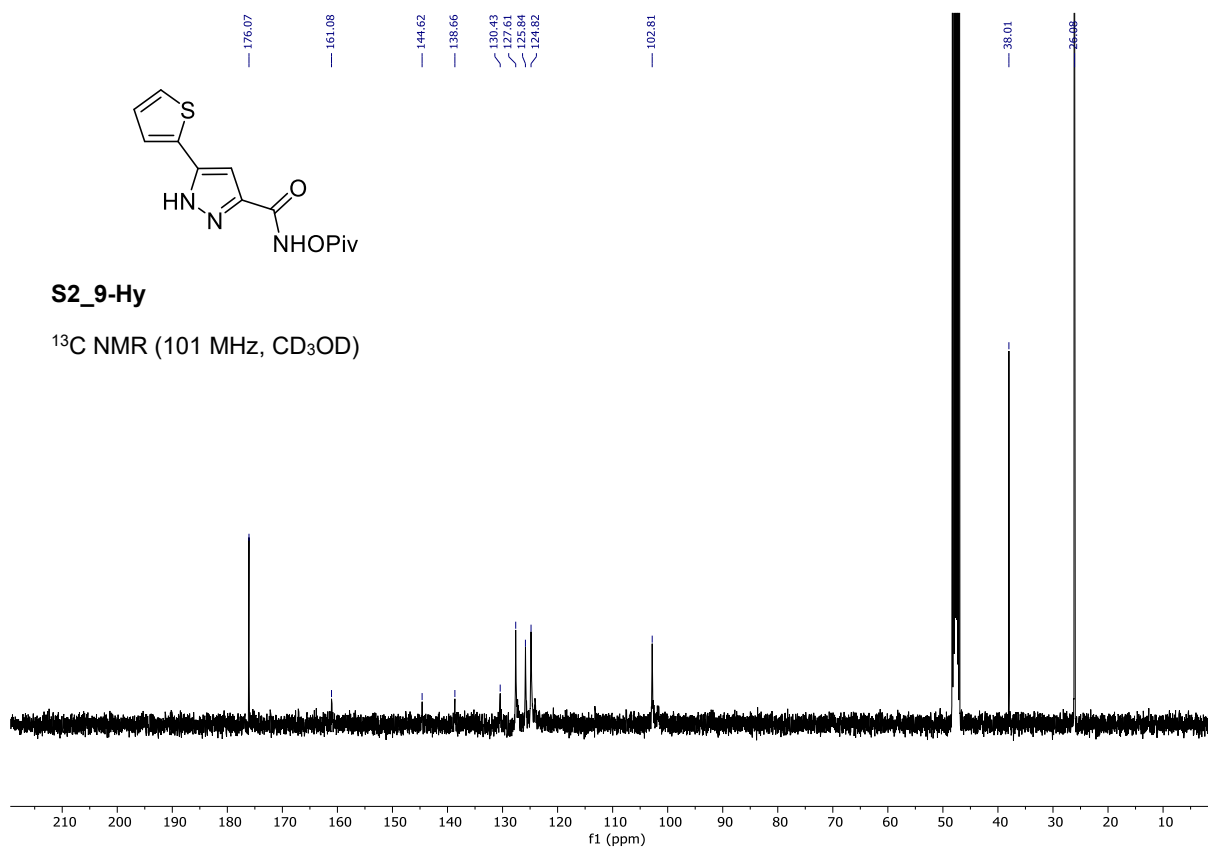

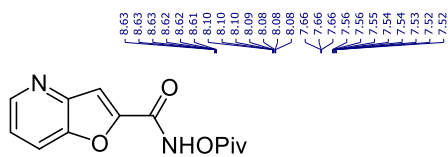

**S2\_10-Hy**

$^1\text{H}$  NMR (400 MHz,  $\text{CD}_3\text{OD}$ )

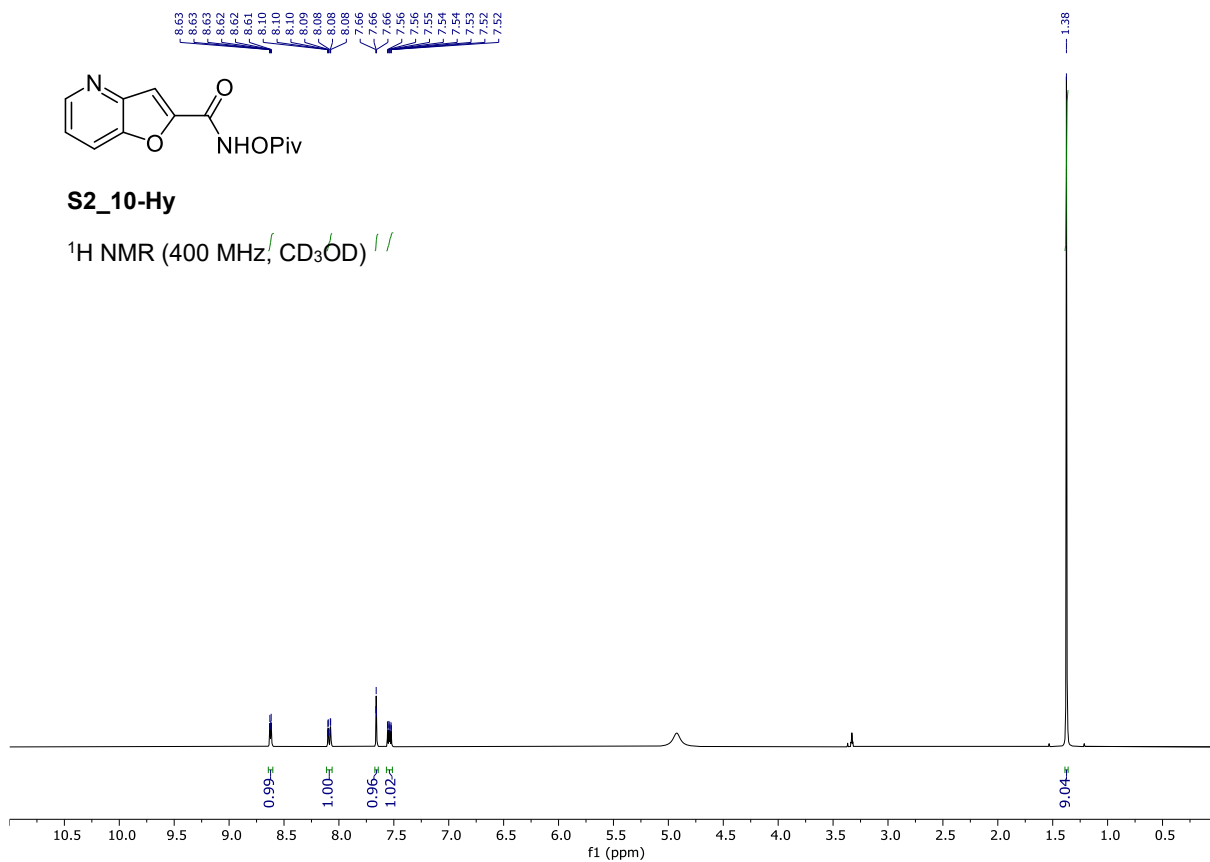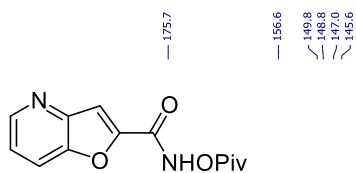

**S2\_10-Hy**

$^{13}\text{C}$  NMR (101 MHz,  $\text{CD}_3\text{OD}$ )

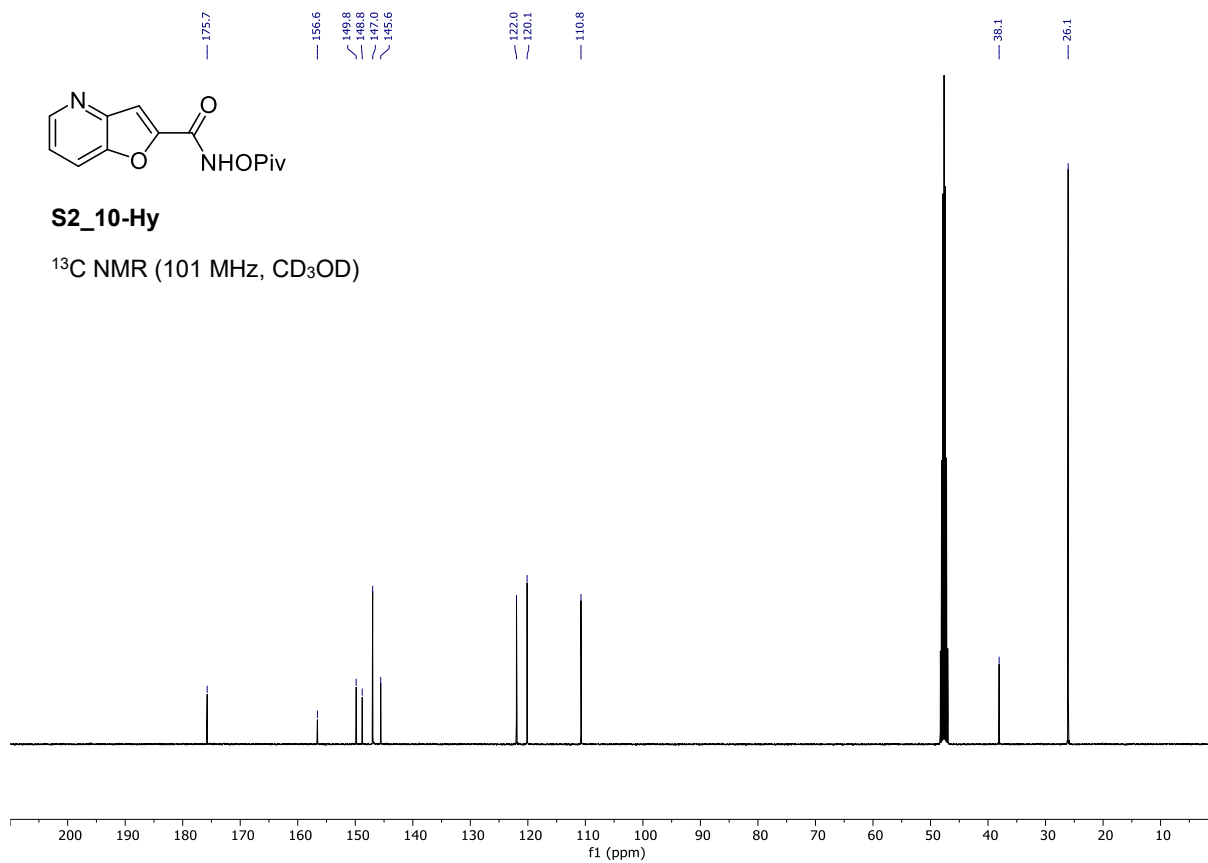

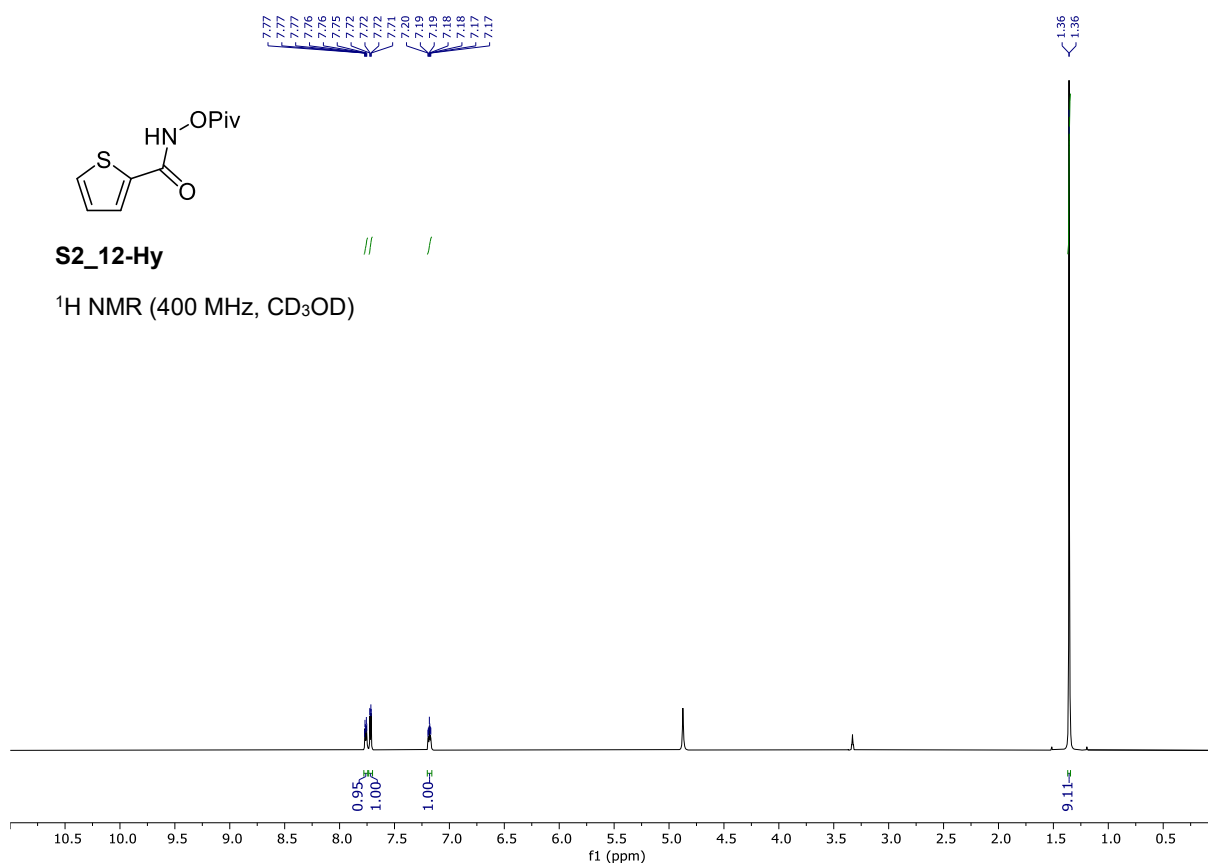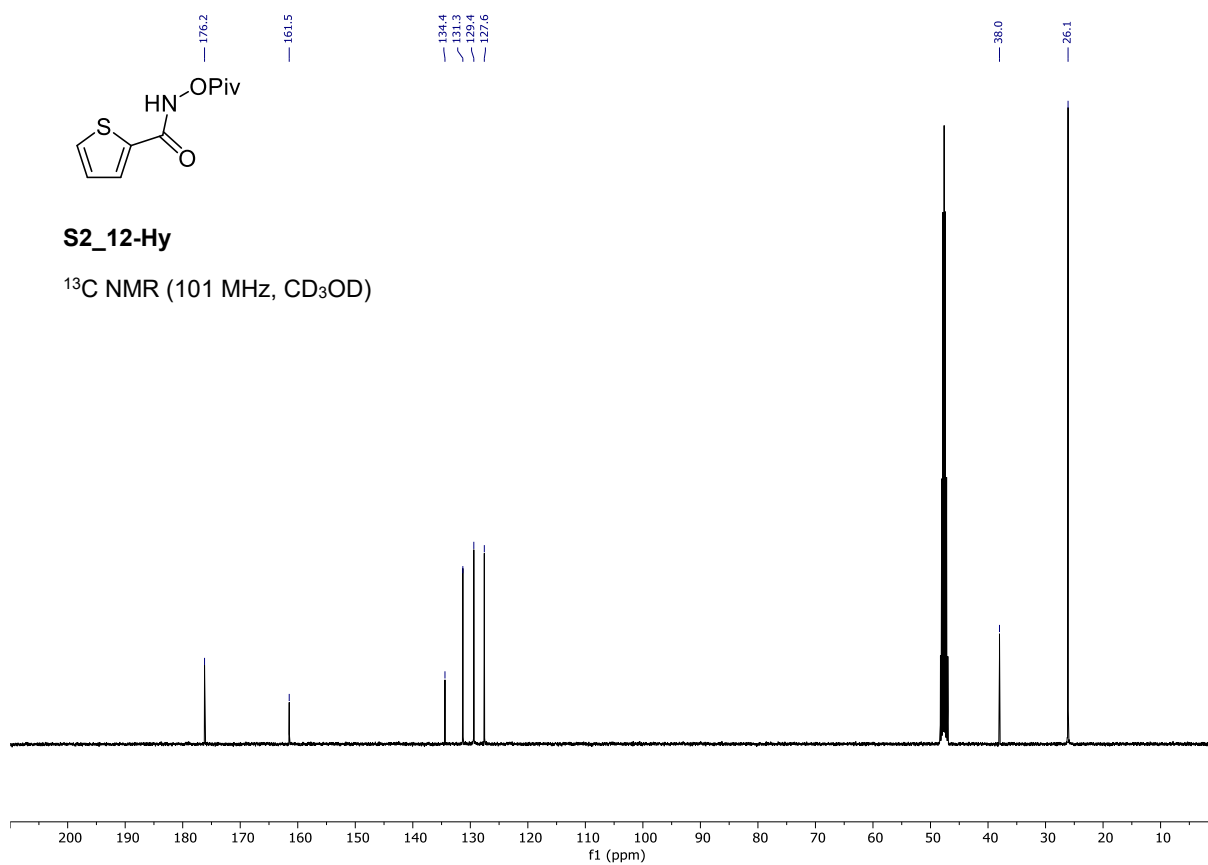

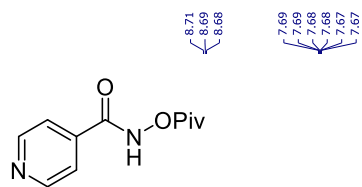

**S2\_13-Hy**

$^1\text{H}$  NMR (400 MHz,  $\text{CDCl}_3$ )

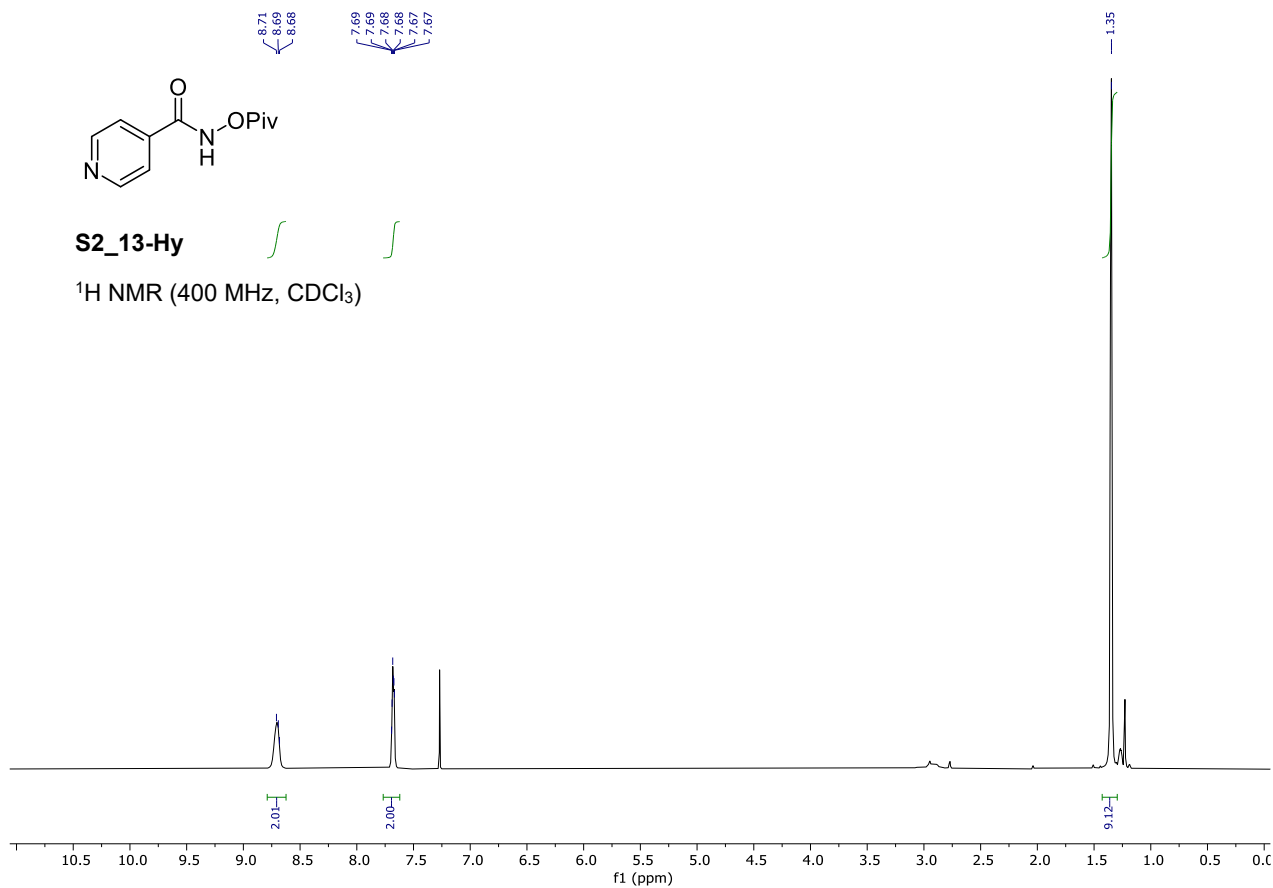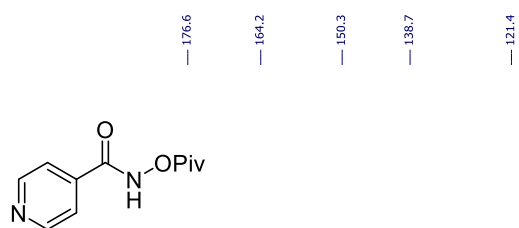

**S2\_13-Hy**

$^{13}\text{C}$  NMR (101 MHz,  $\text{CDCl}_3$ )

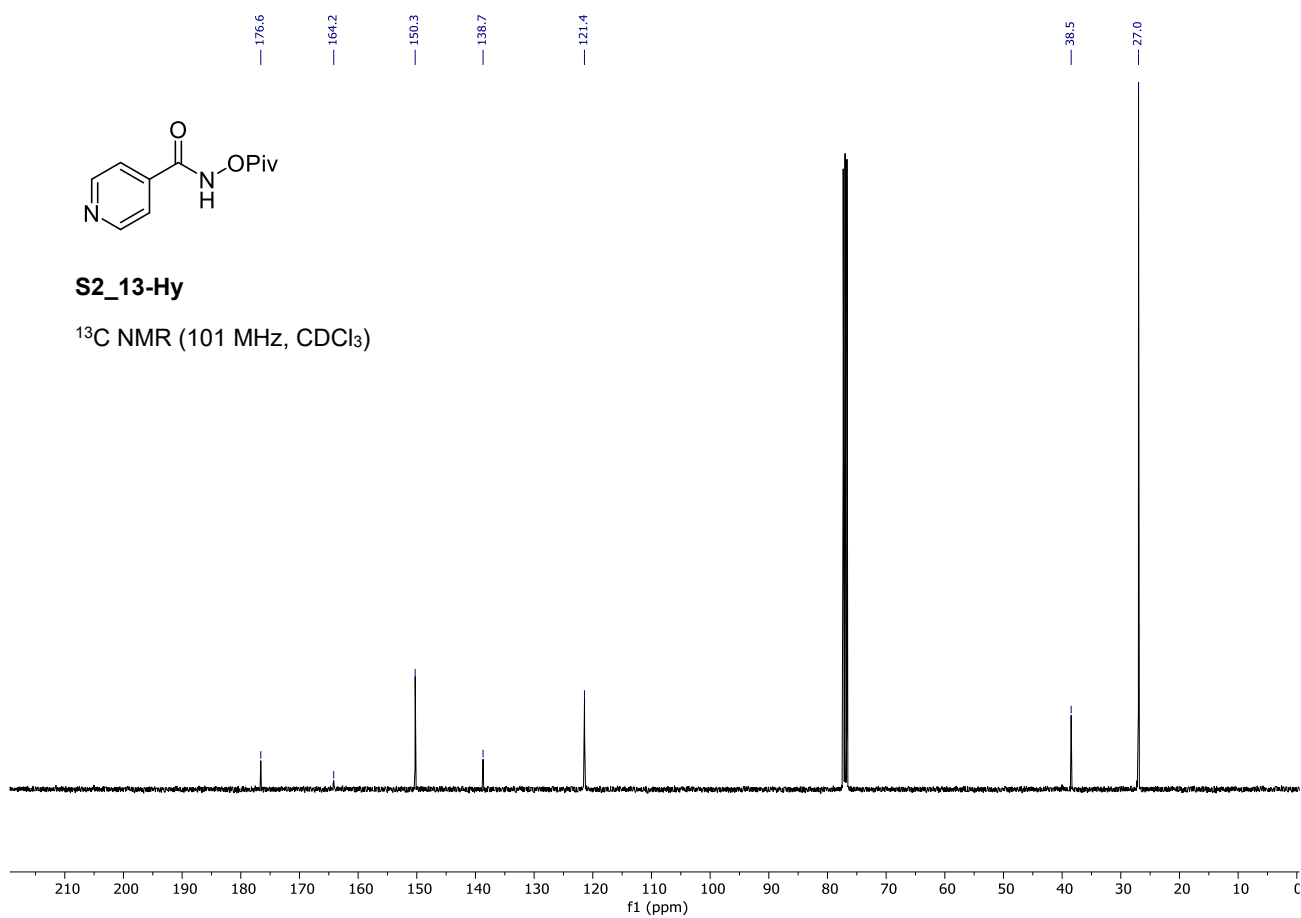

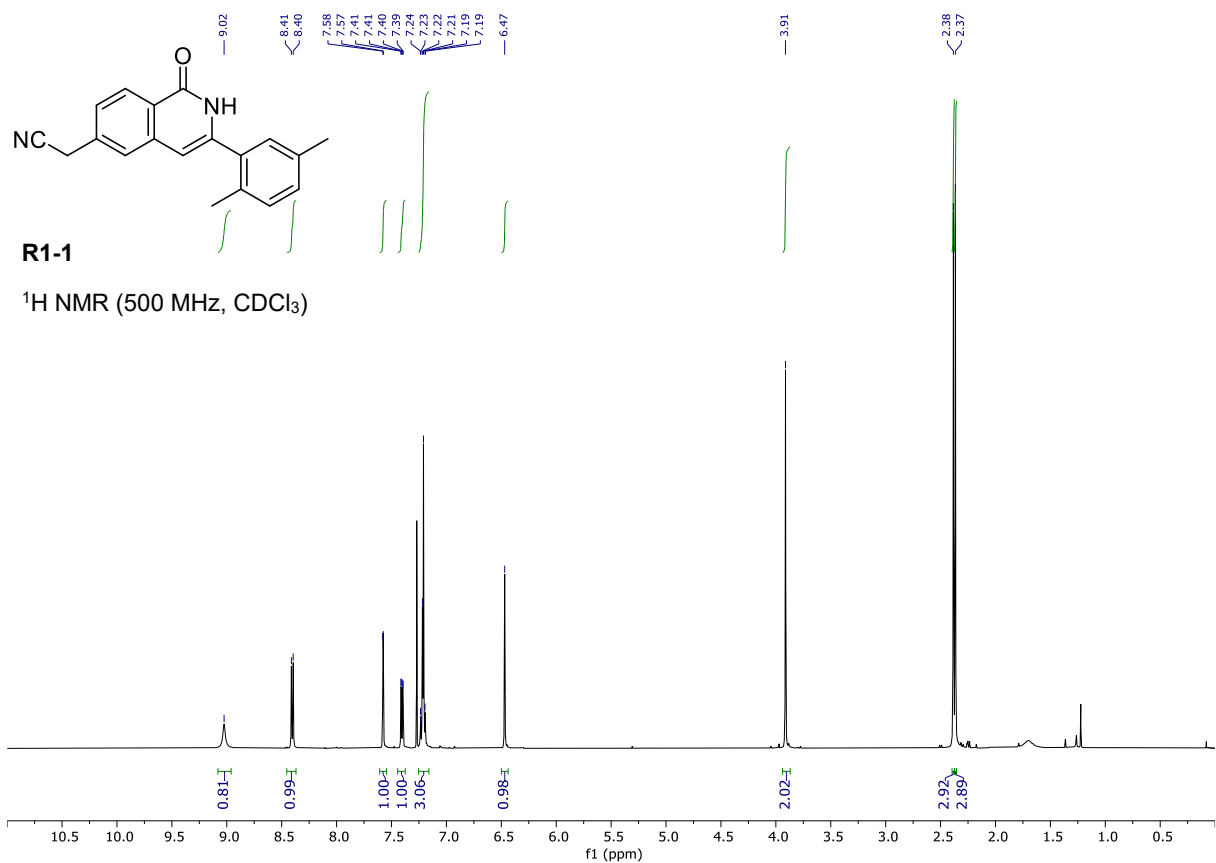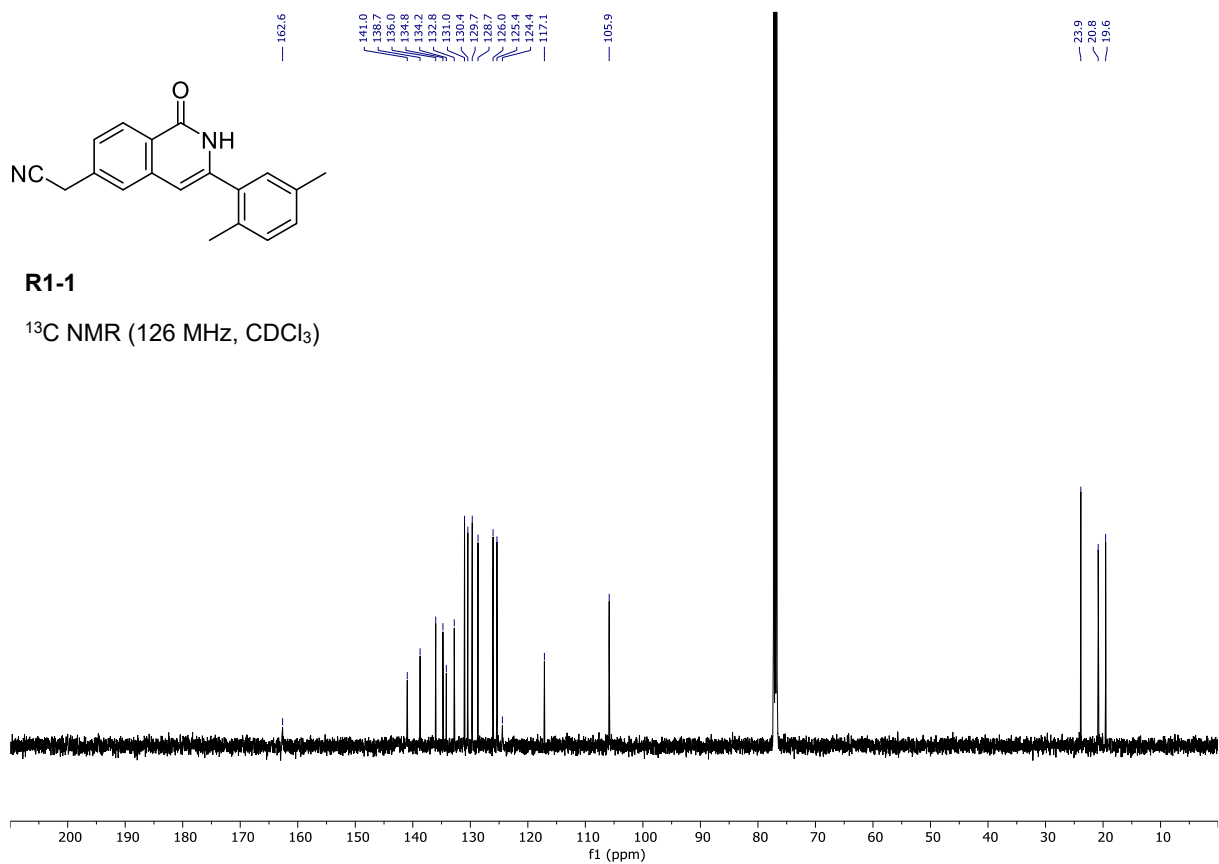



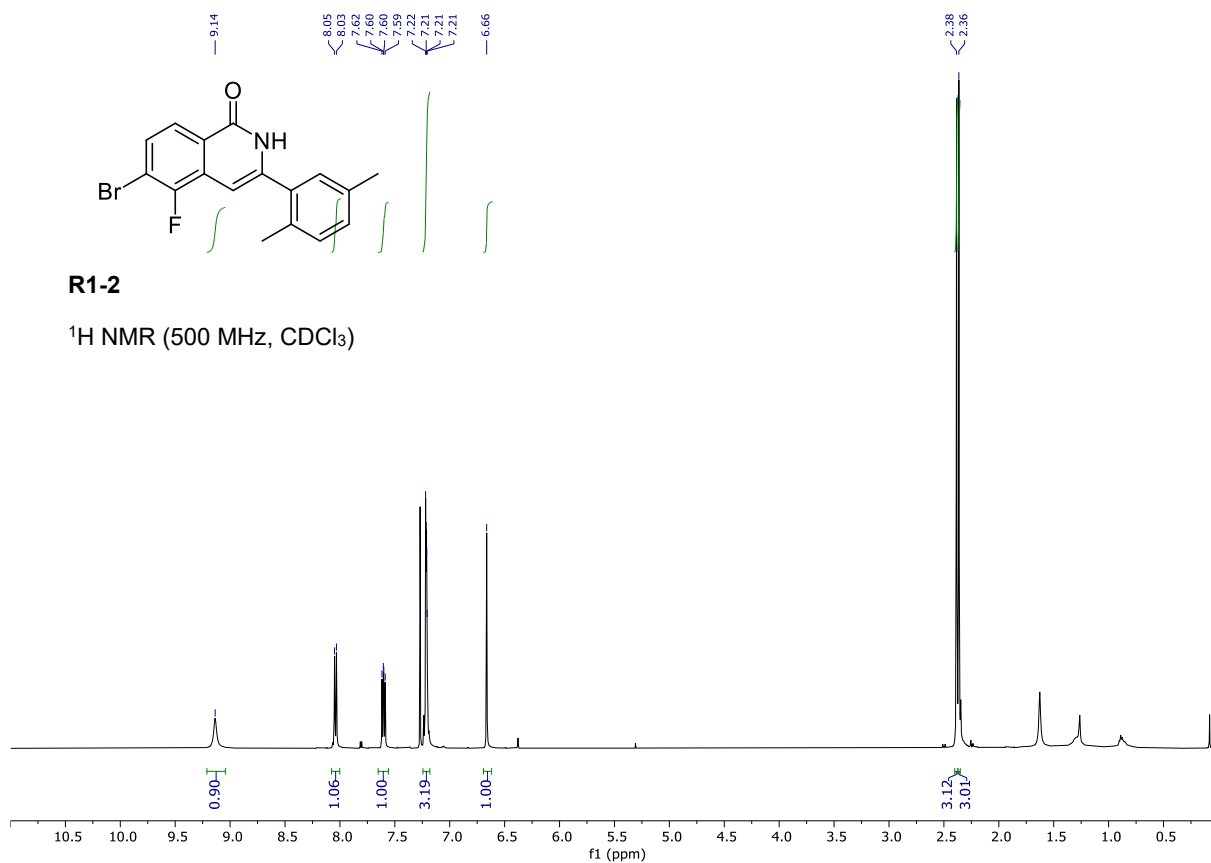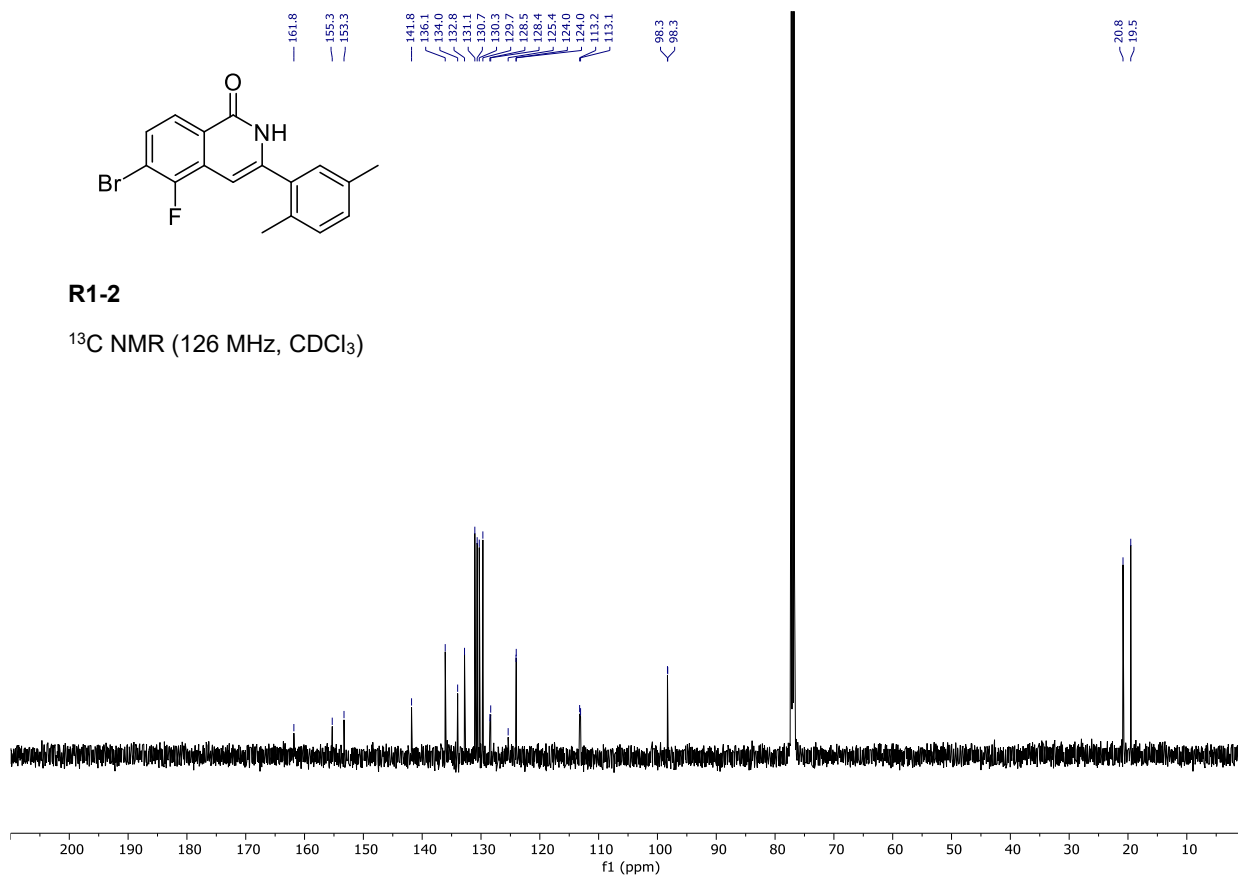

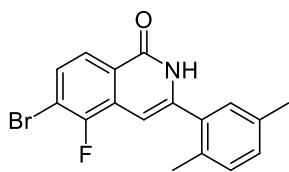

**R1-2**

$^{19}\text{F}$  NMR (471 MHz,  $\text{CDCl}_3$ )

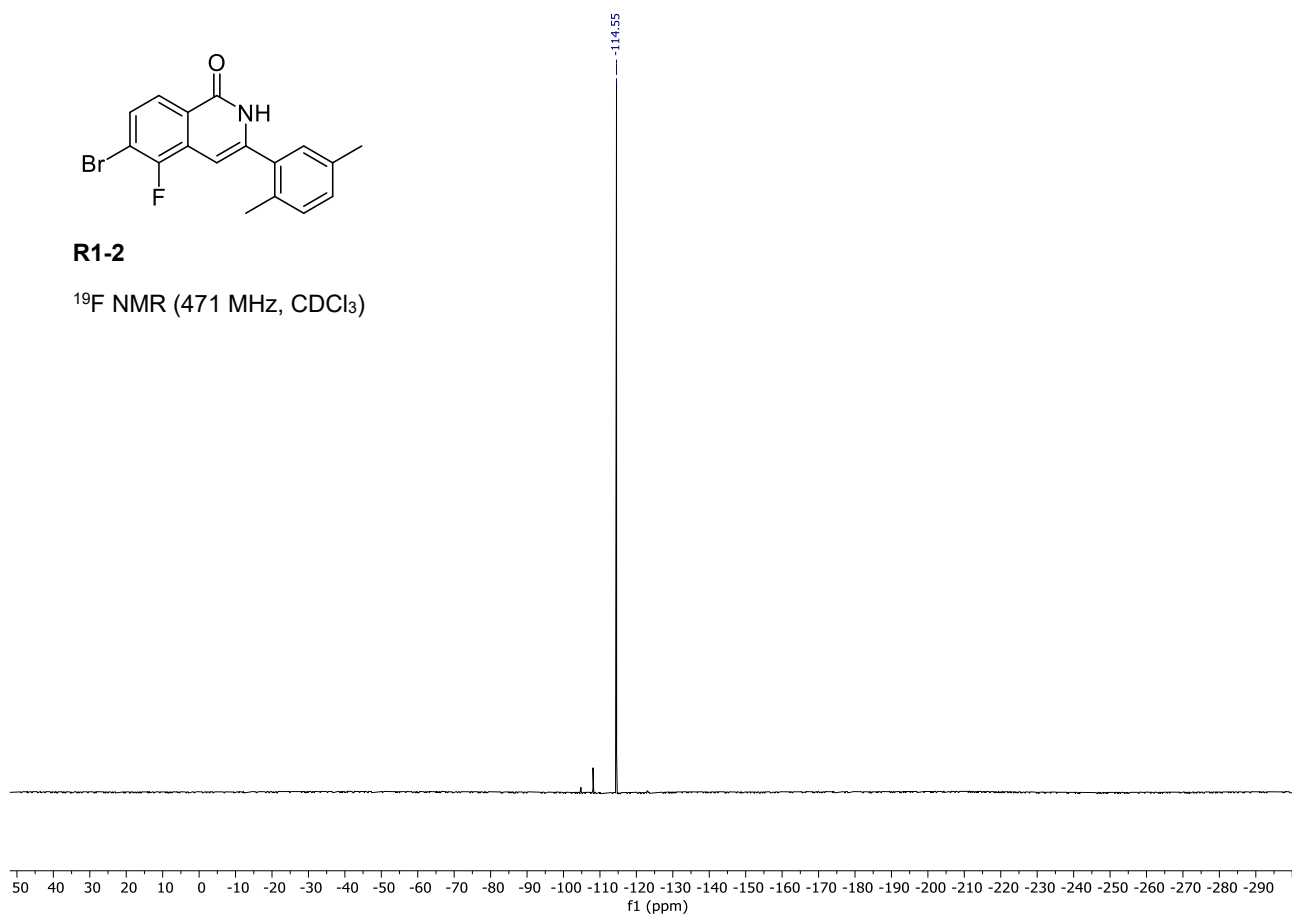

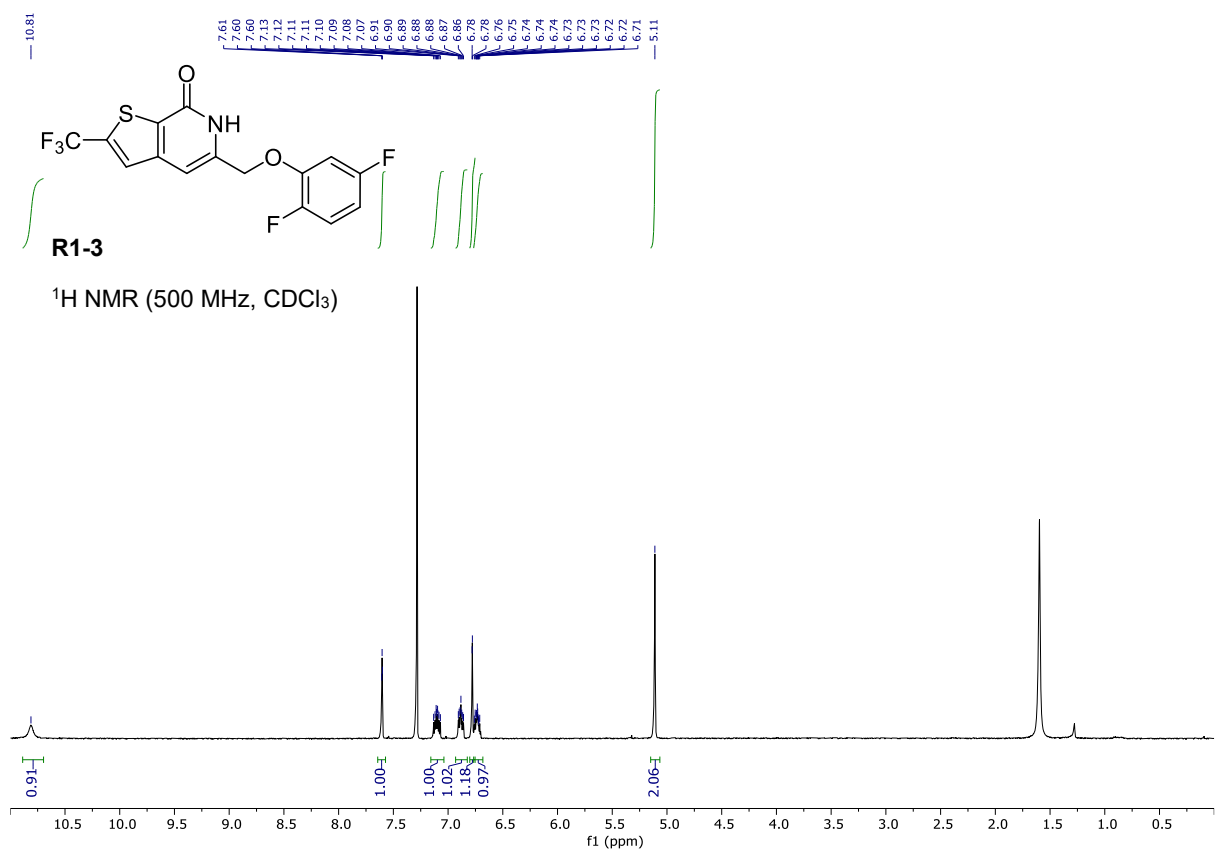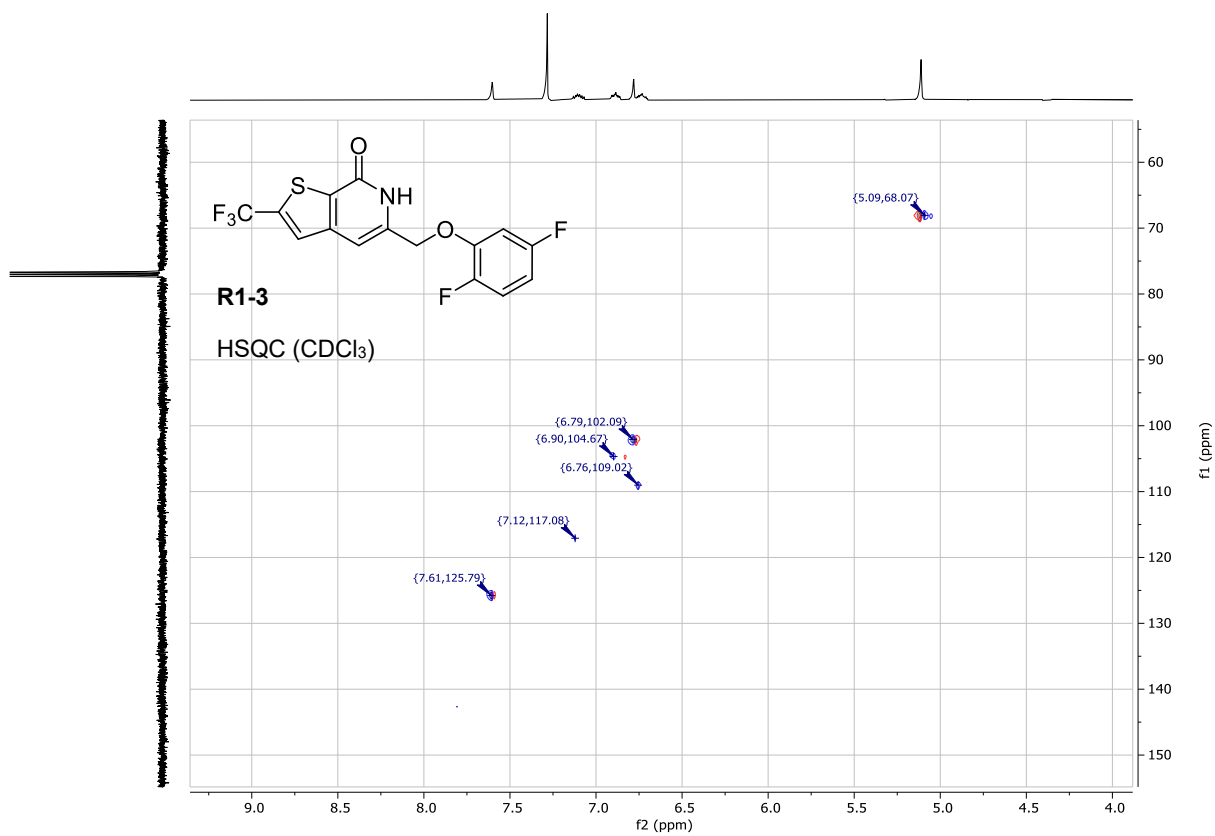

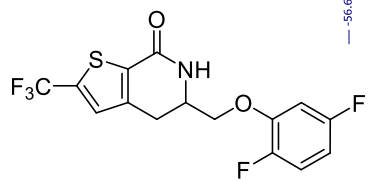

**R1-3**

$^{19}\text{F}$  NMR (471 MHz,  $\text{CDCl}_3$ )

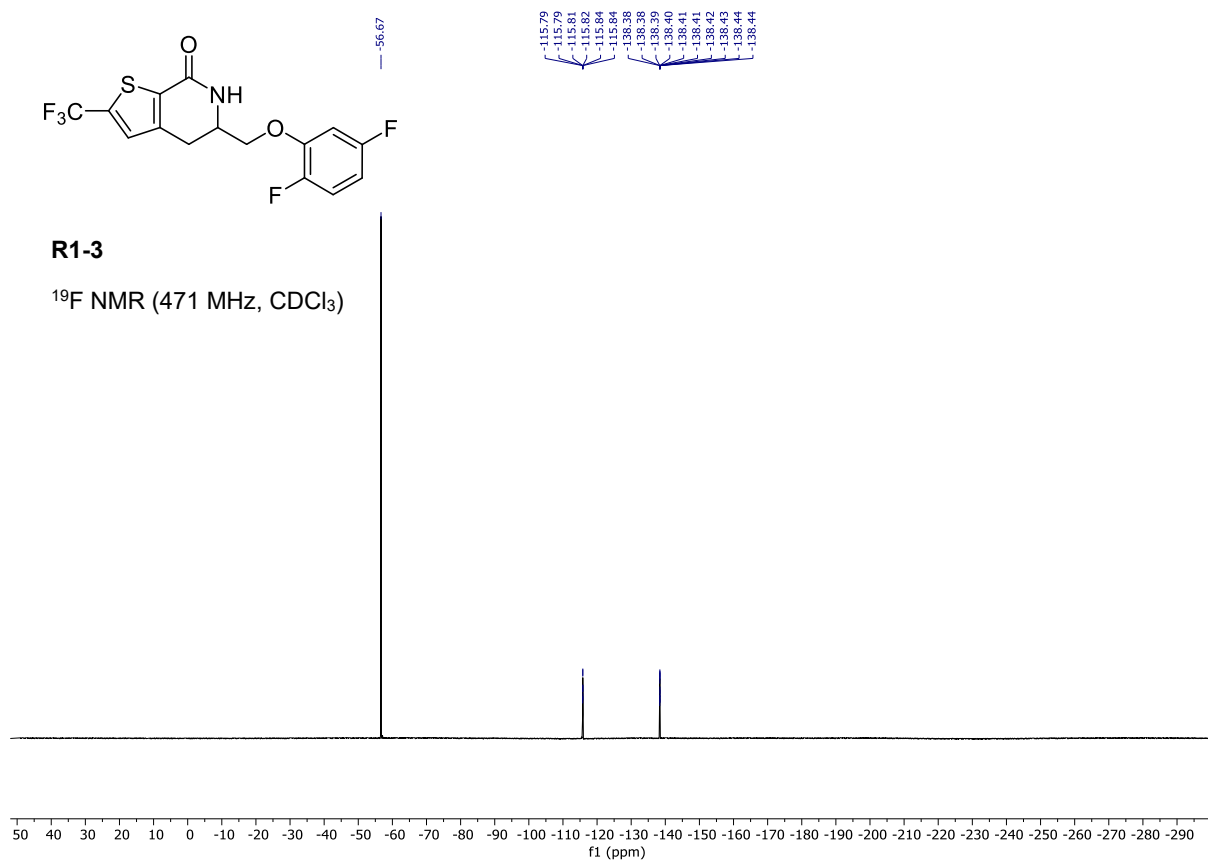

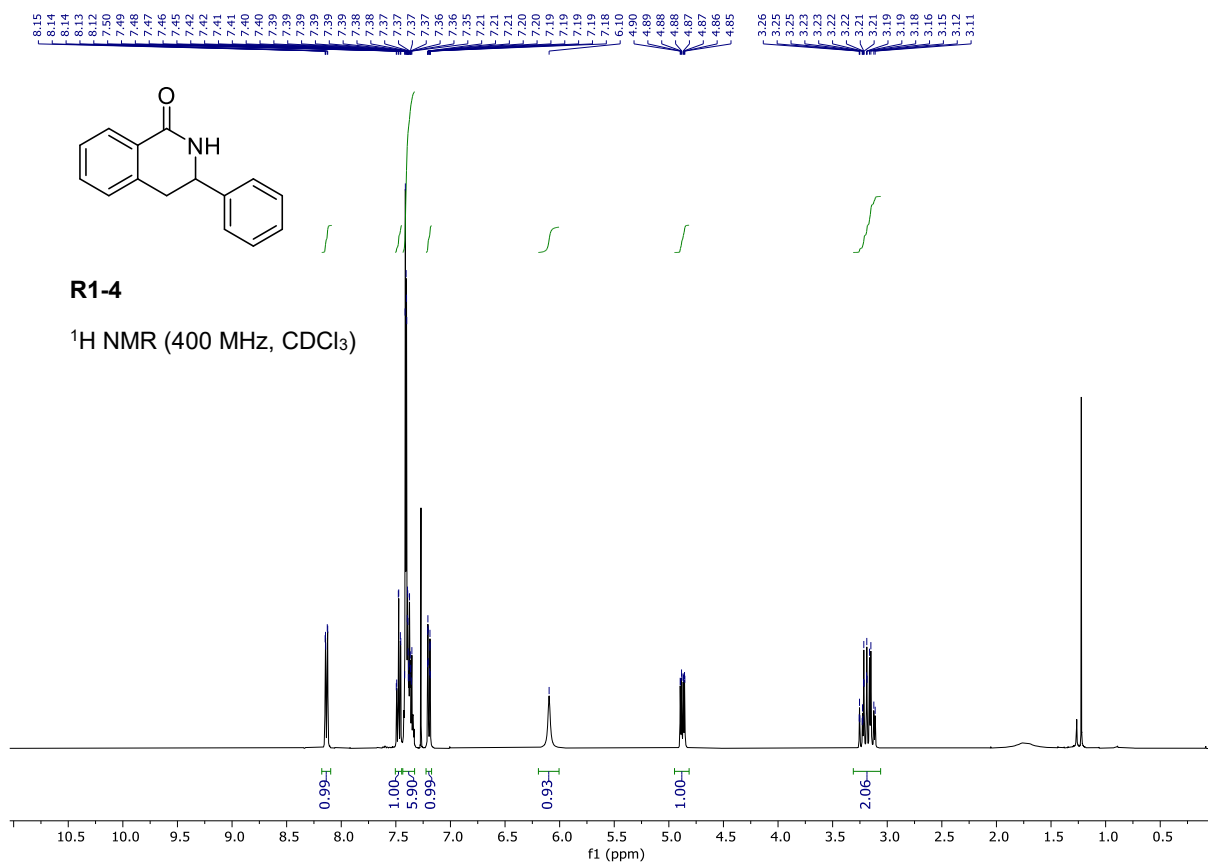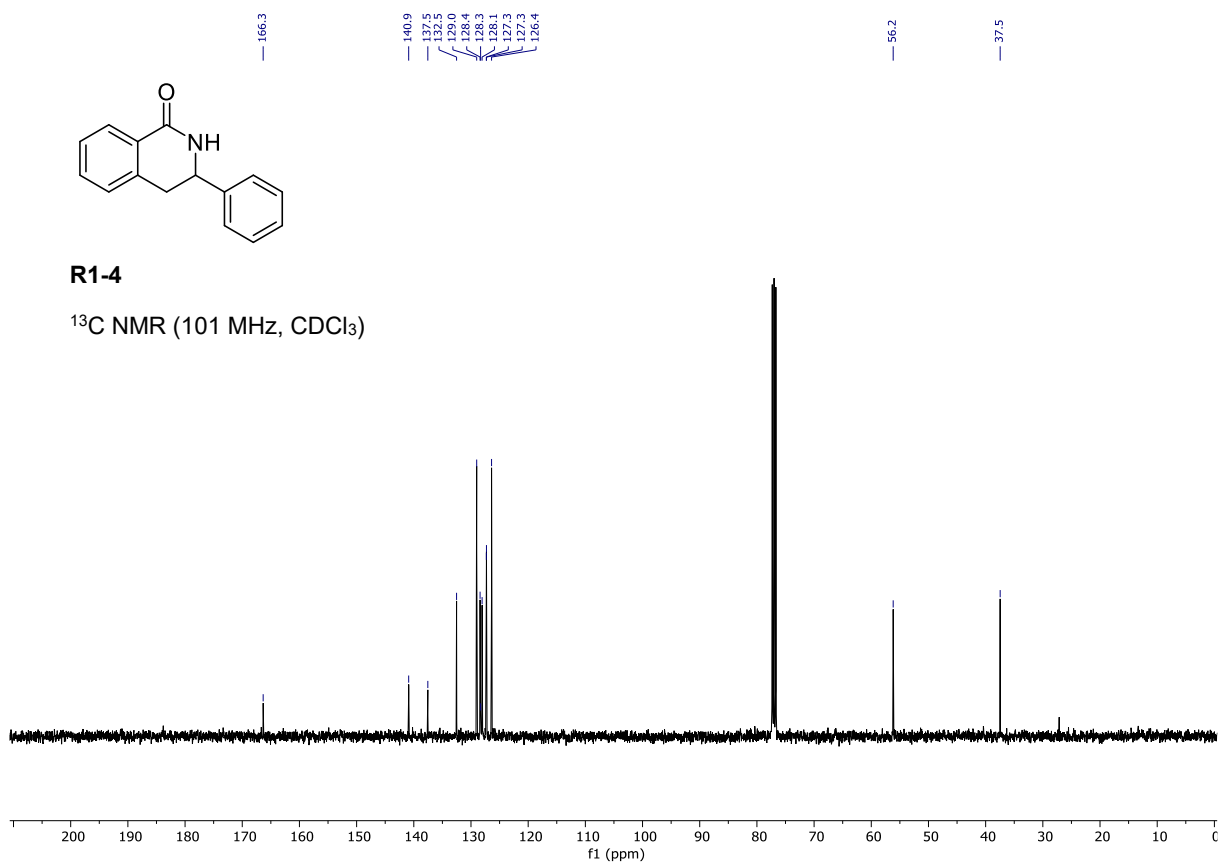

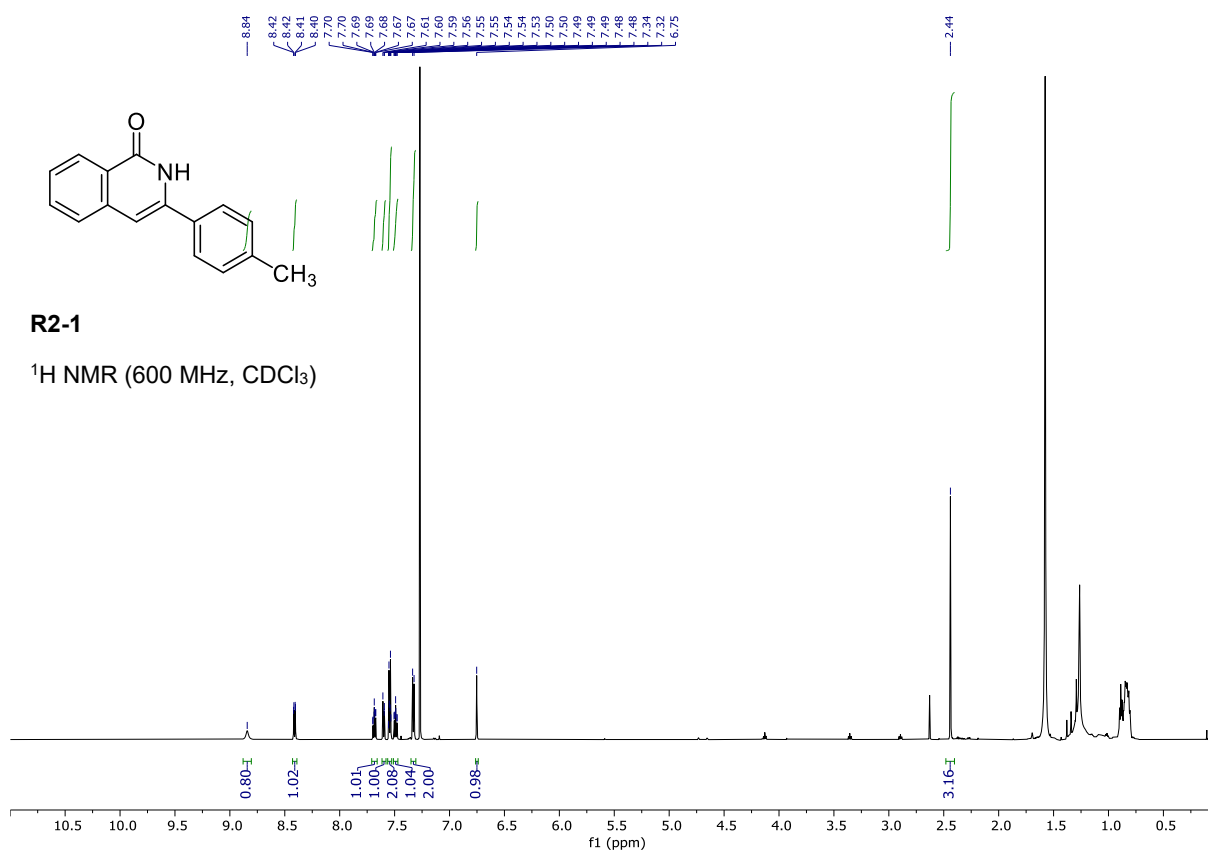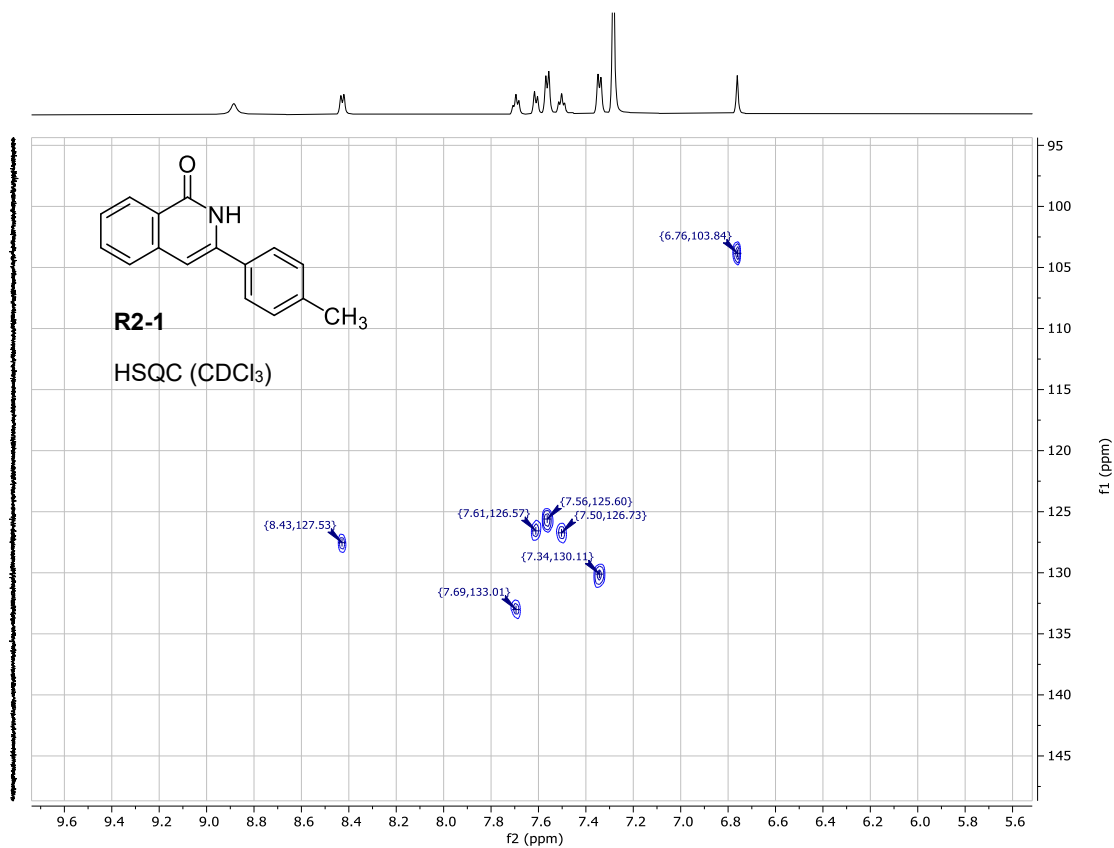

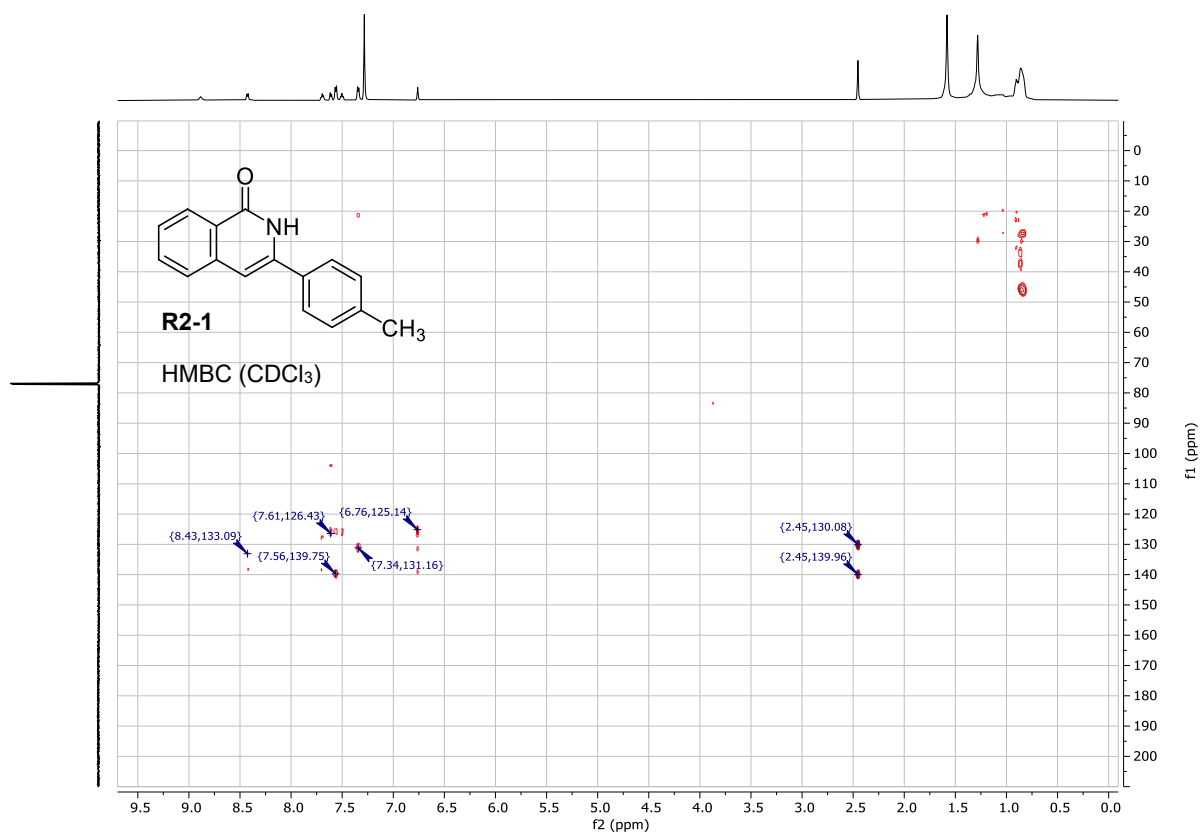

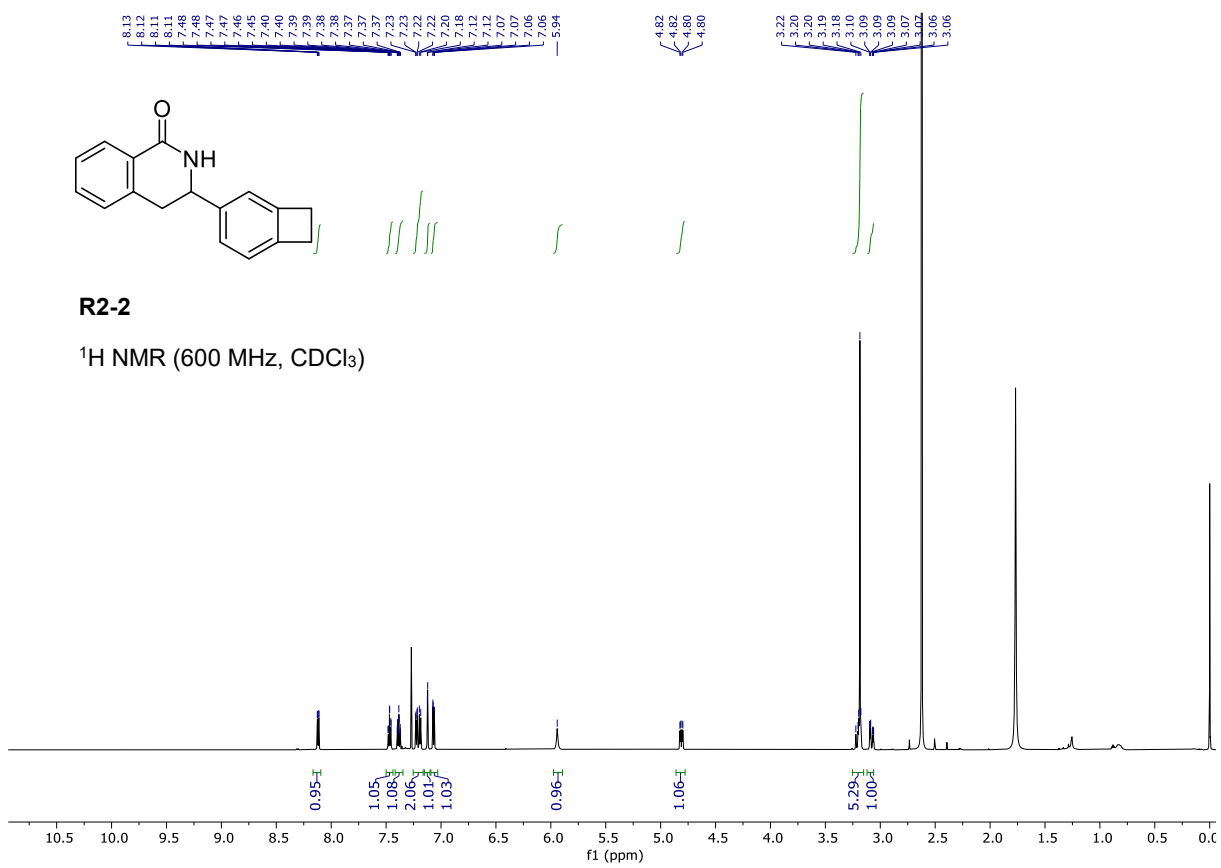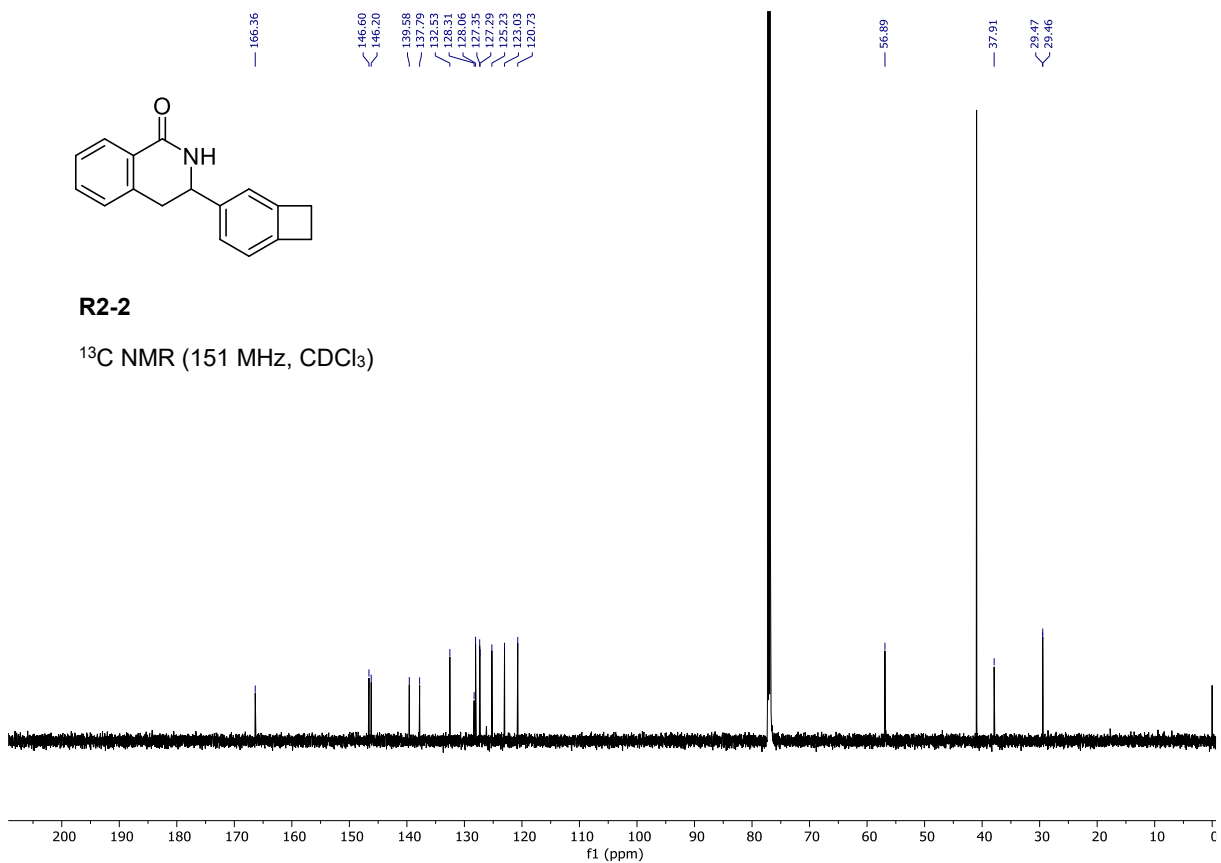



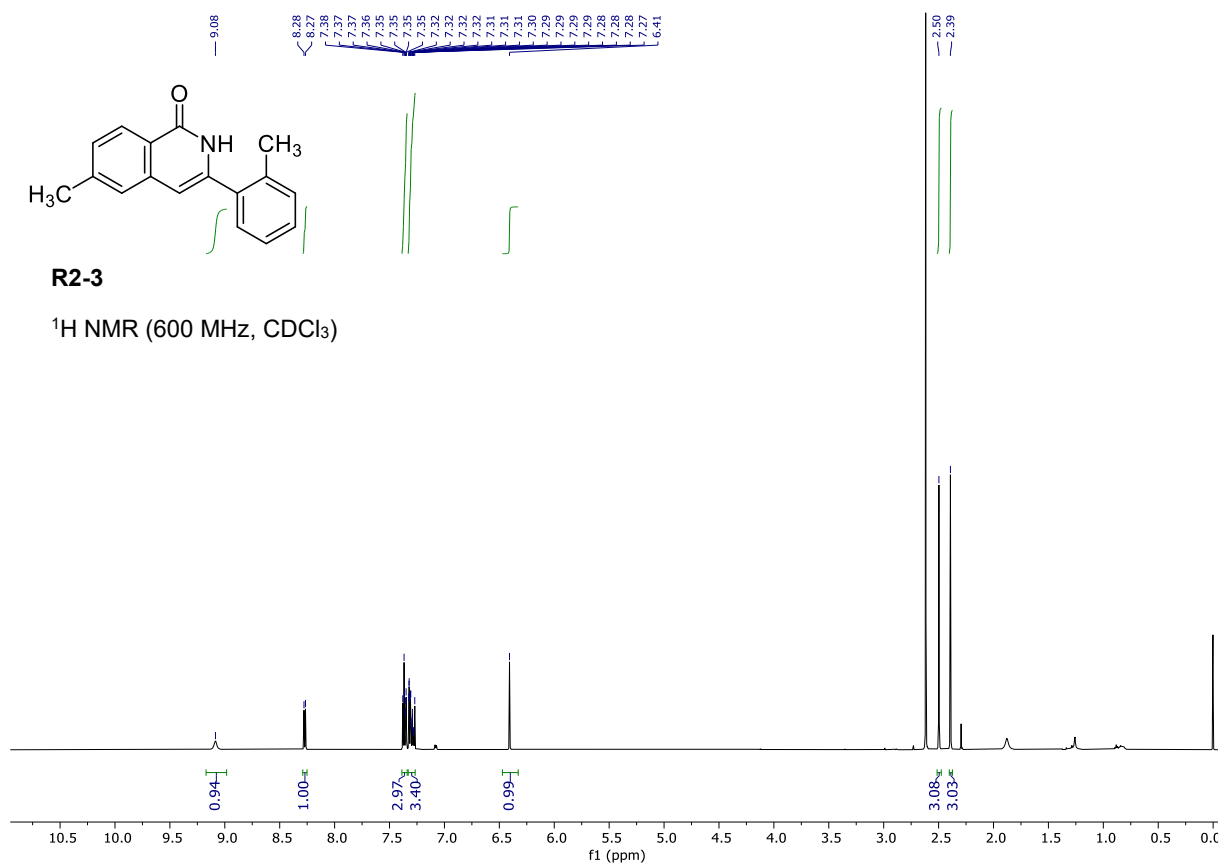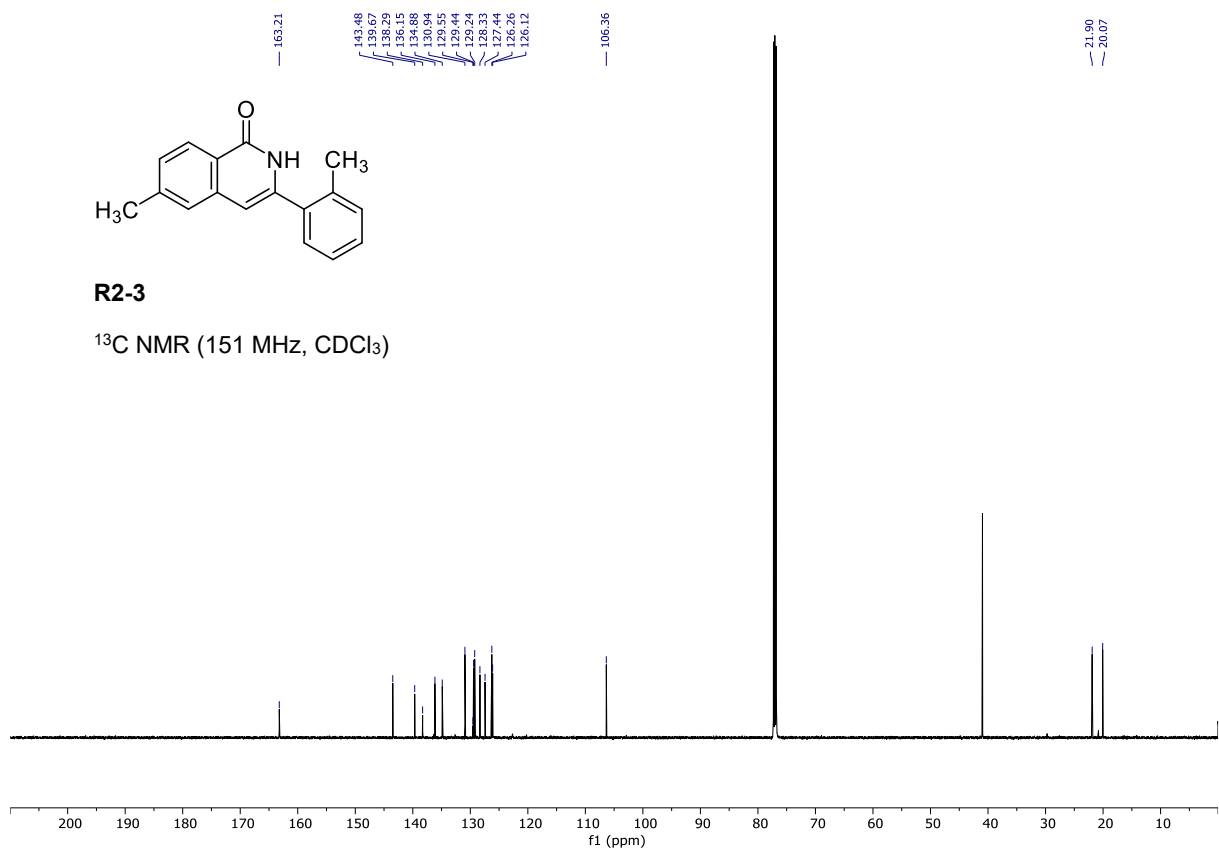

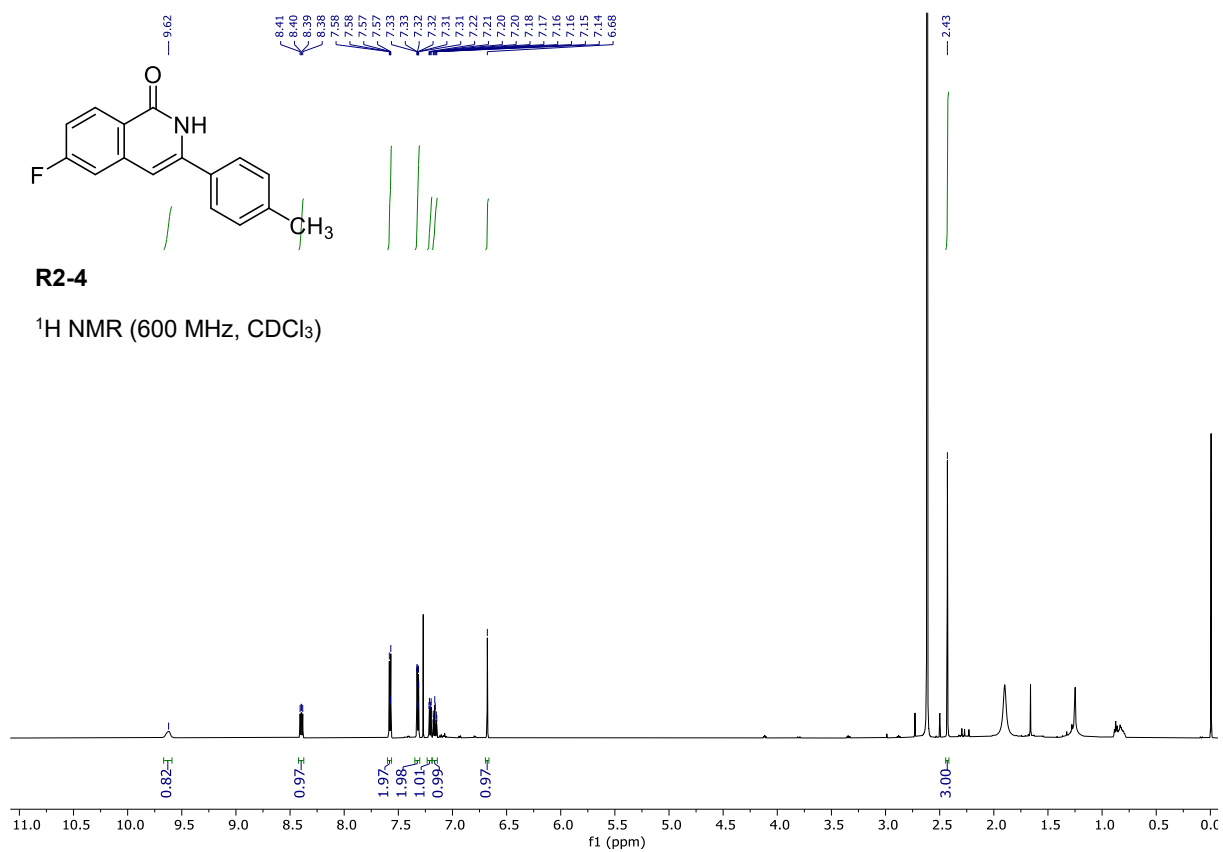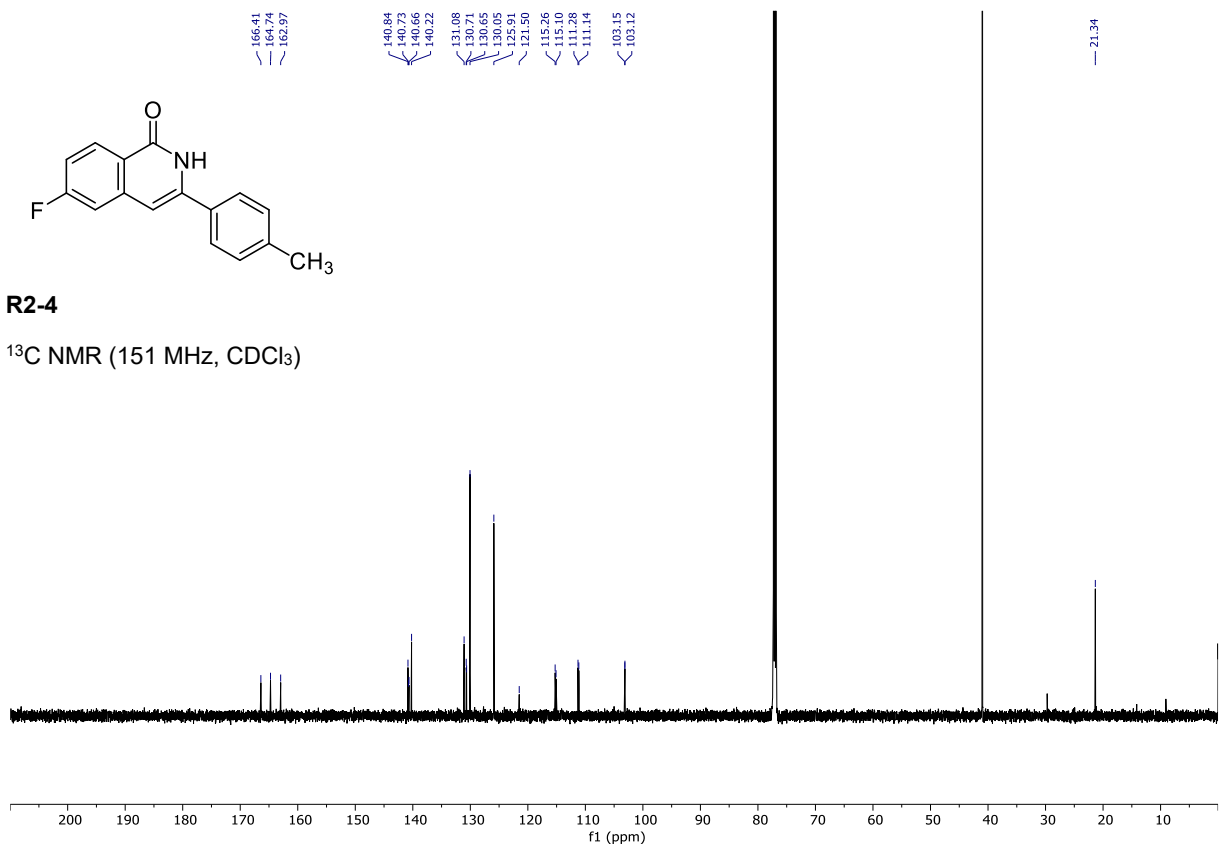

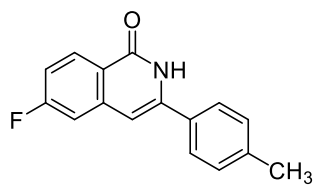

**R2-4**

$^{19}\text{F}$  NMR (376 MHz,  $\text{CDCl}_3$ )

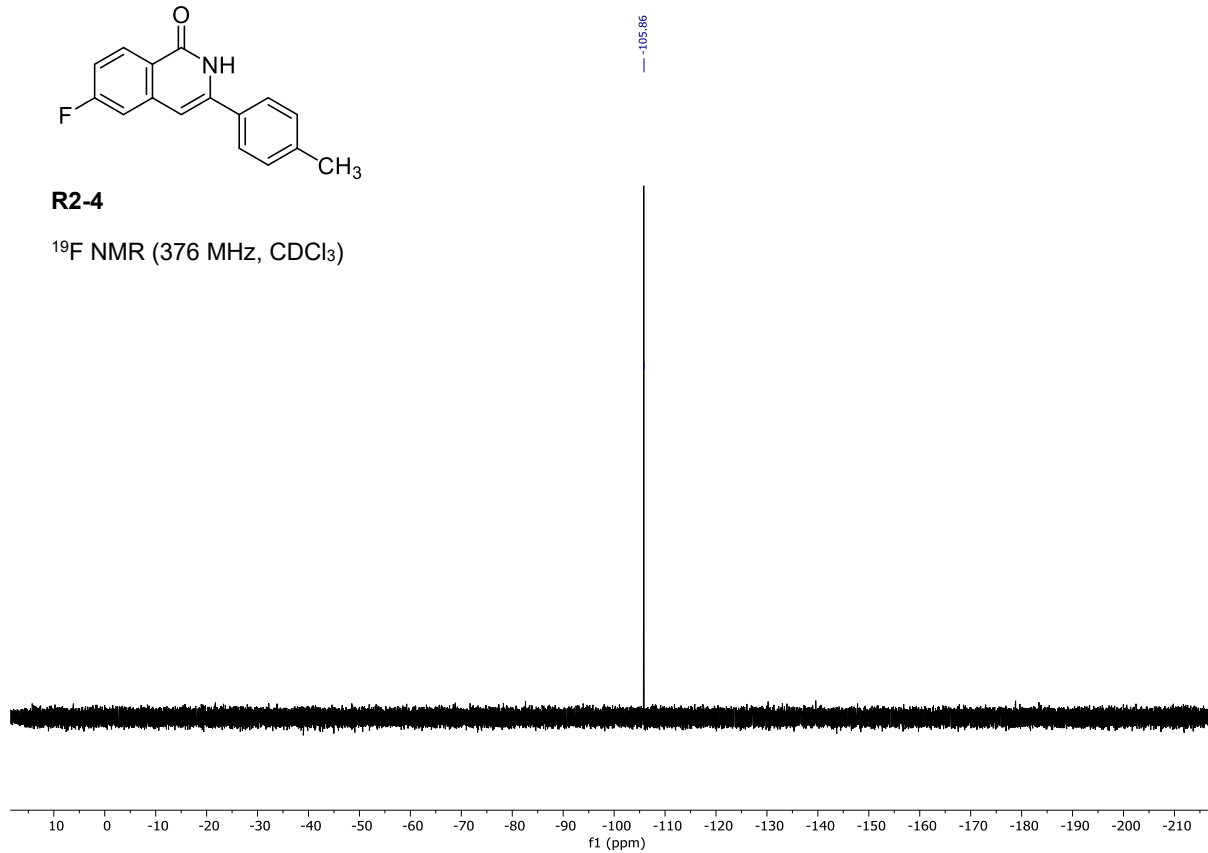

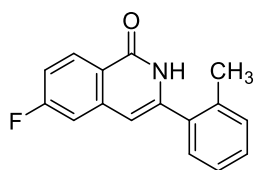

**R2-5**

<sup>1</sup>H NMR (600 MHz, CDCl<sub>3</sub>)

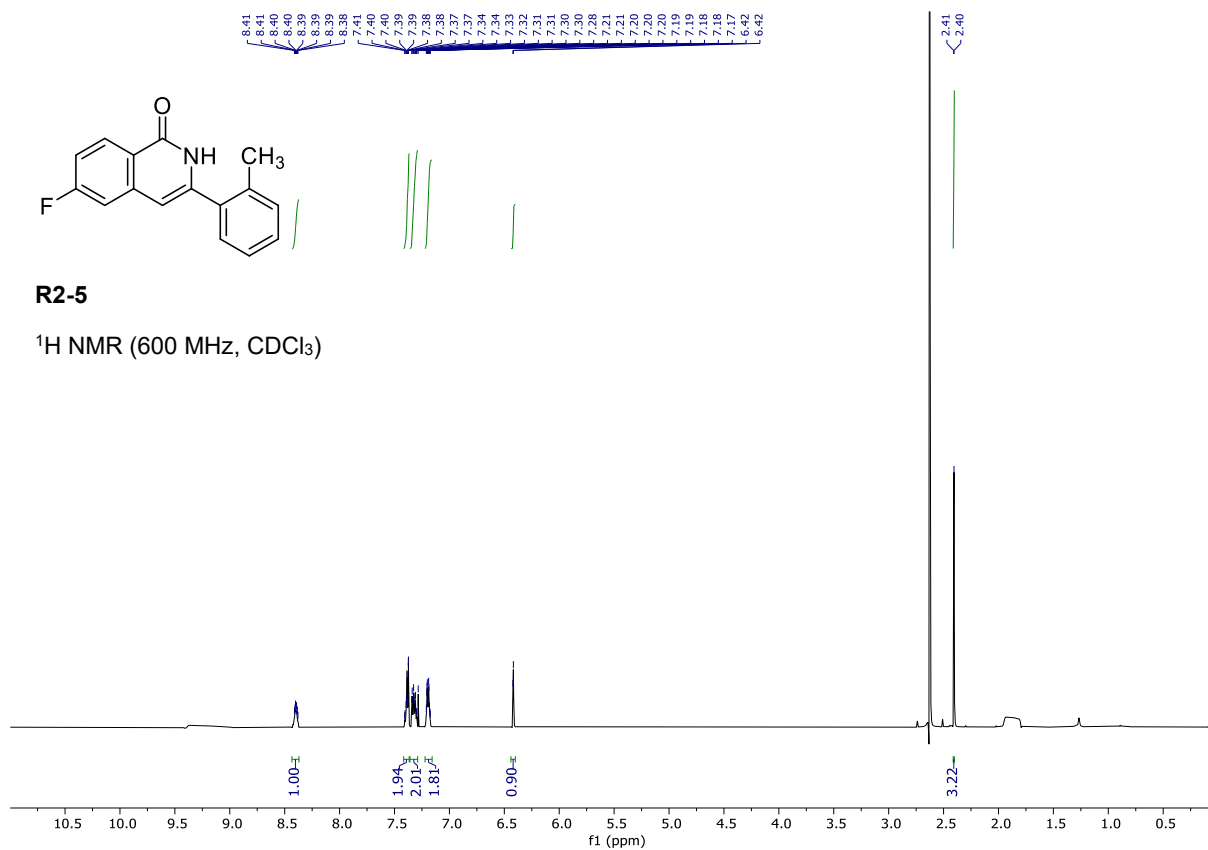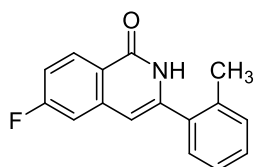

**R2-5**

<sup>13</sup>C NMR (151 MHz, CDCl<sub>3</sub>)

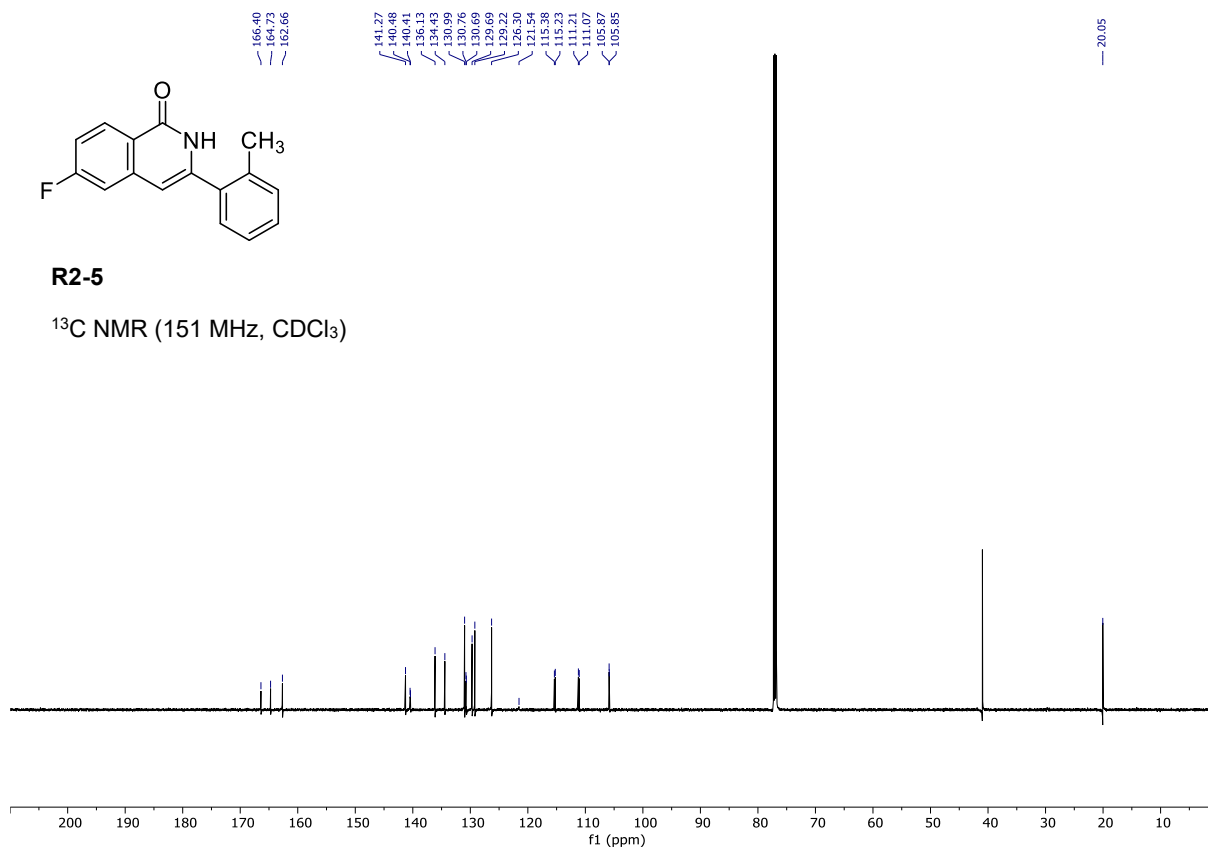

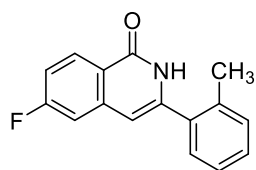

**R2-5**

$^{19}\text{F}$  NMR (376 MHz,  $\text{CDCl}_3$ )

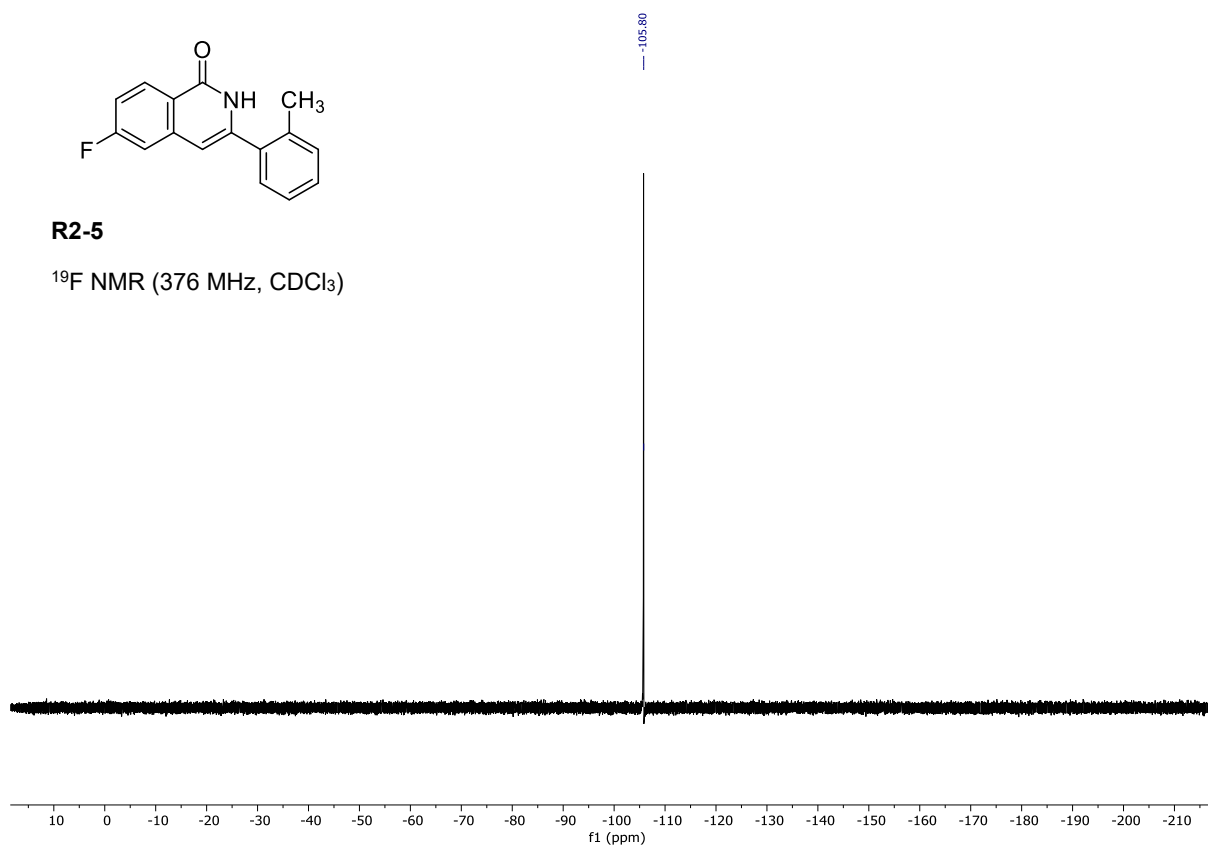

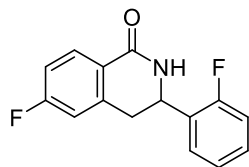

**R2-6**

$^1\text{H}$  NMR (600 MHz,  $\text{CDCl}_3$ )

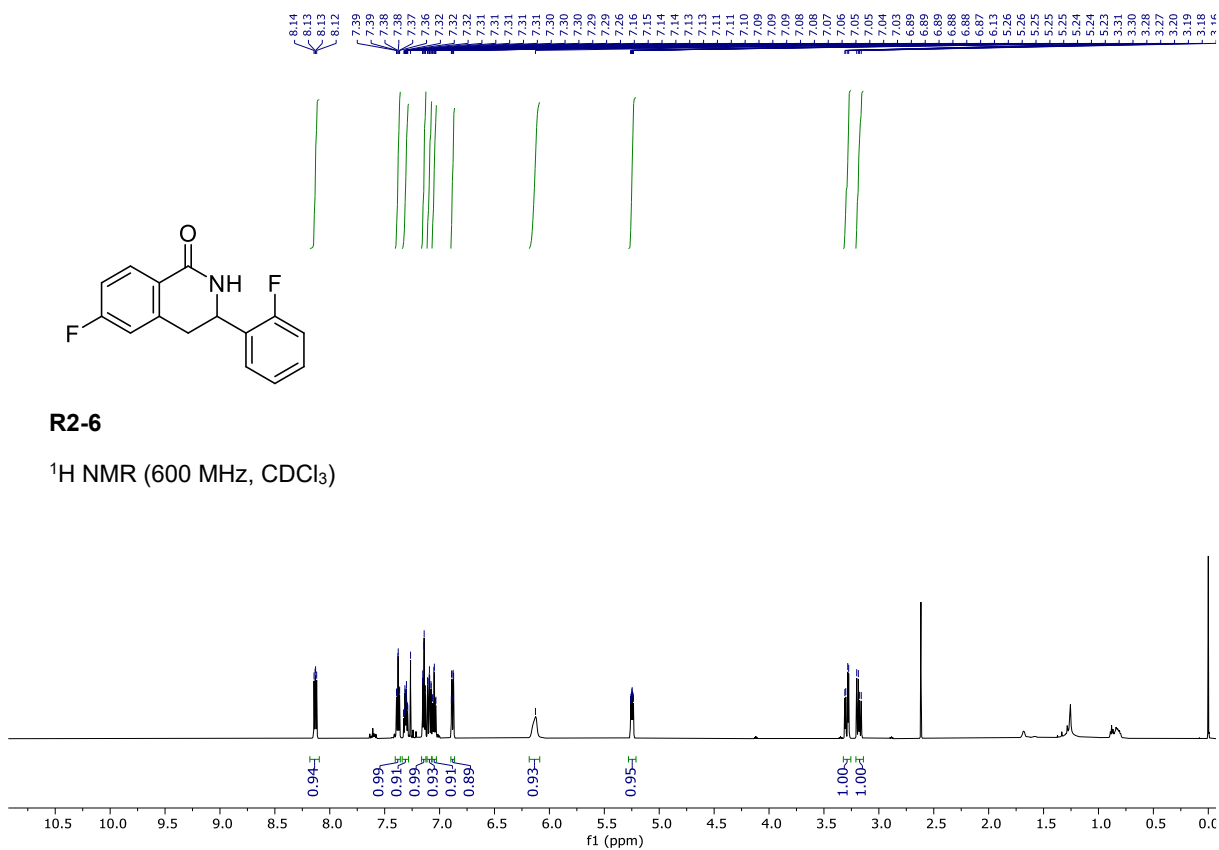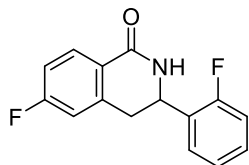

**R2-6**

$^{13}\text{C}$  NMR (151 MHz,  $\text{CDCl}_3$ )

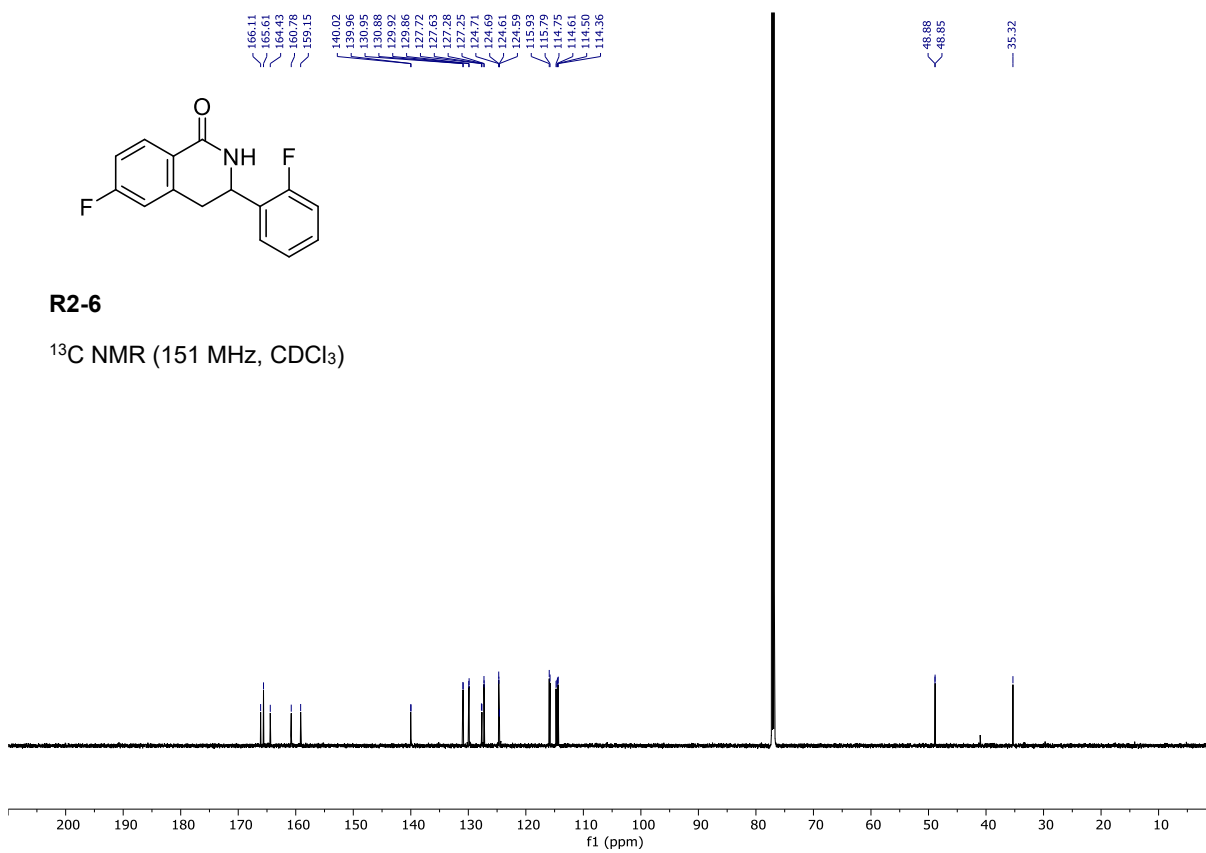

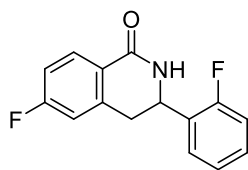

**R2-6**

$^{19}\text{F}$  NMR (376 MHz,  $\text{CDCl}_3$ )

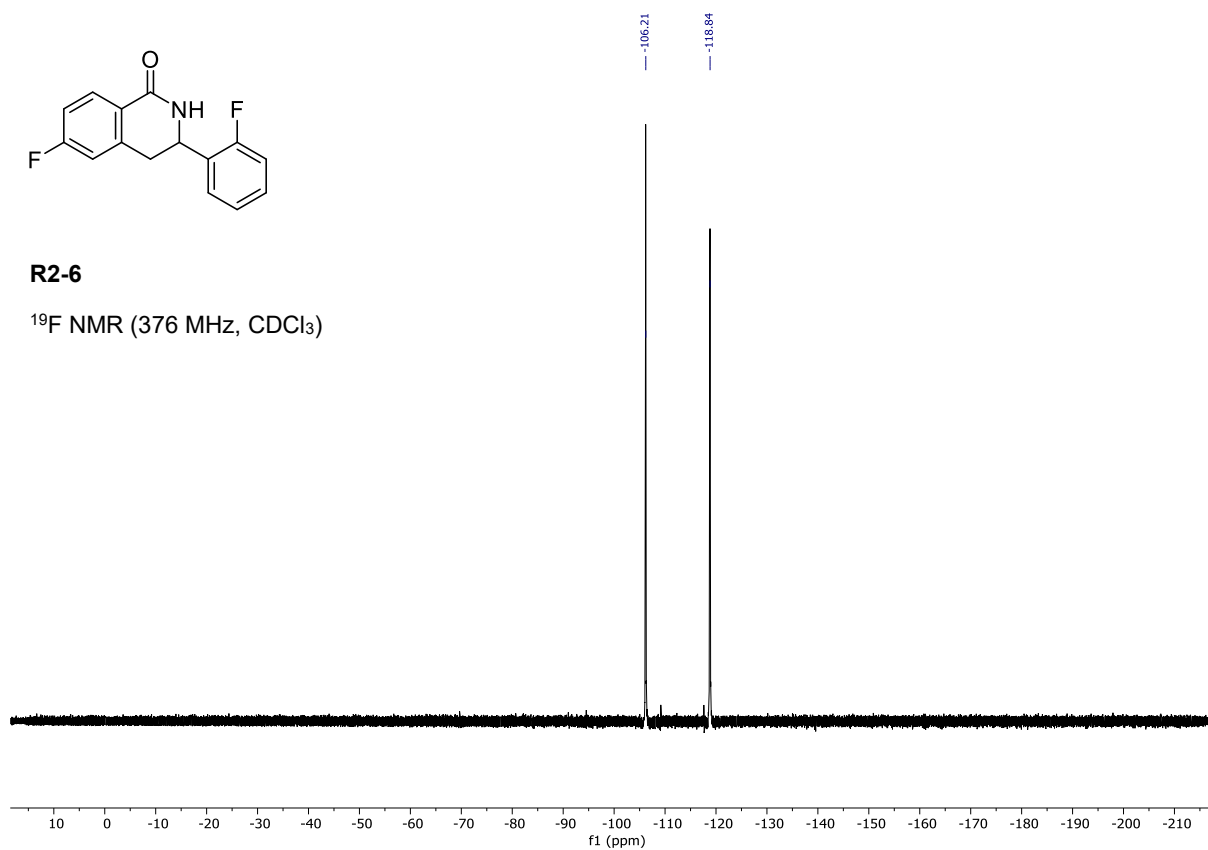

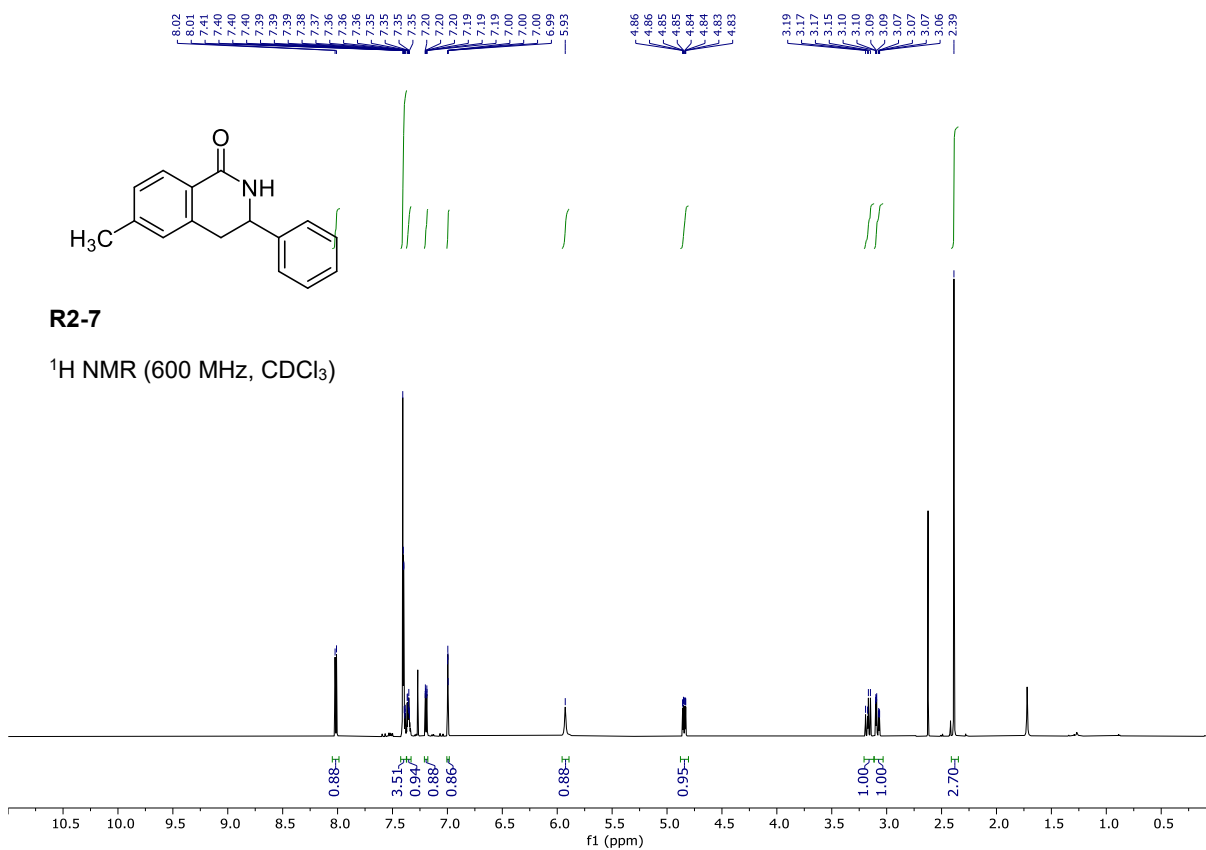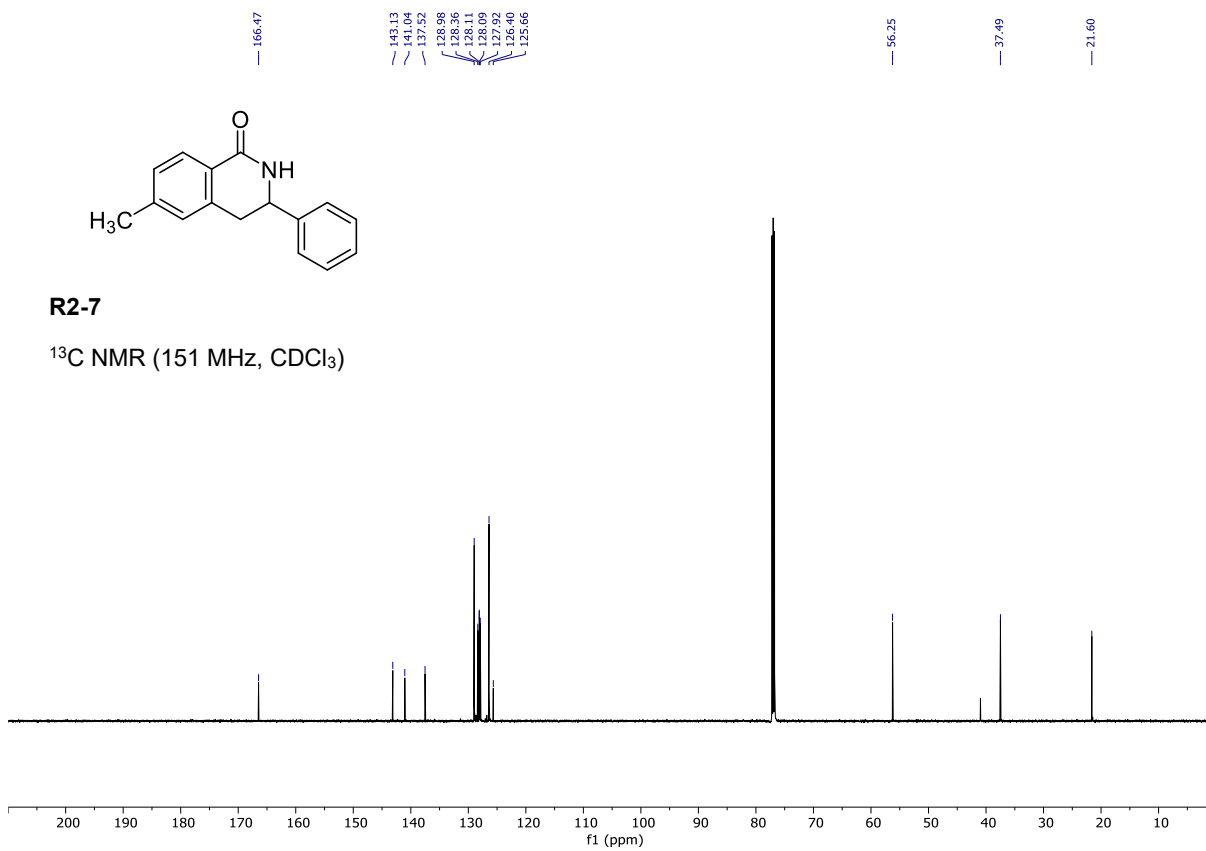



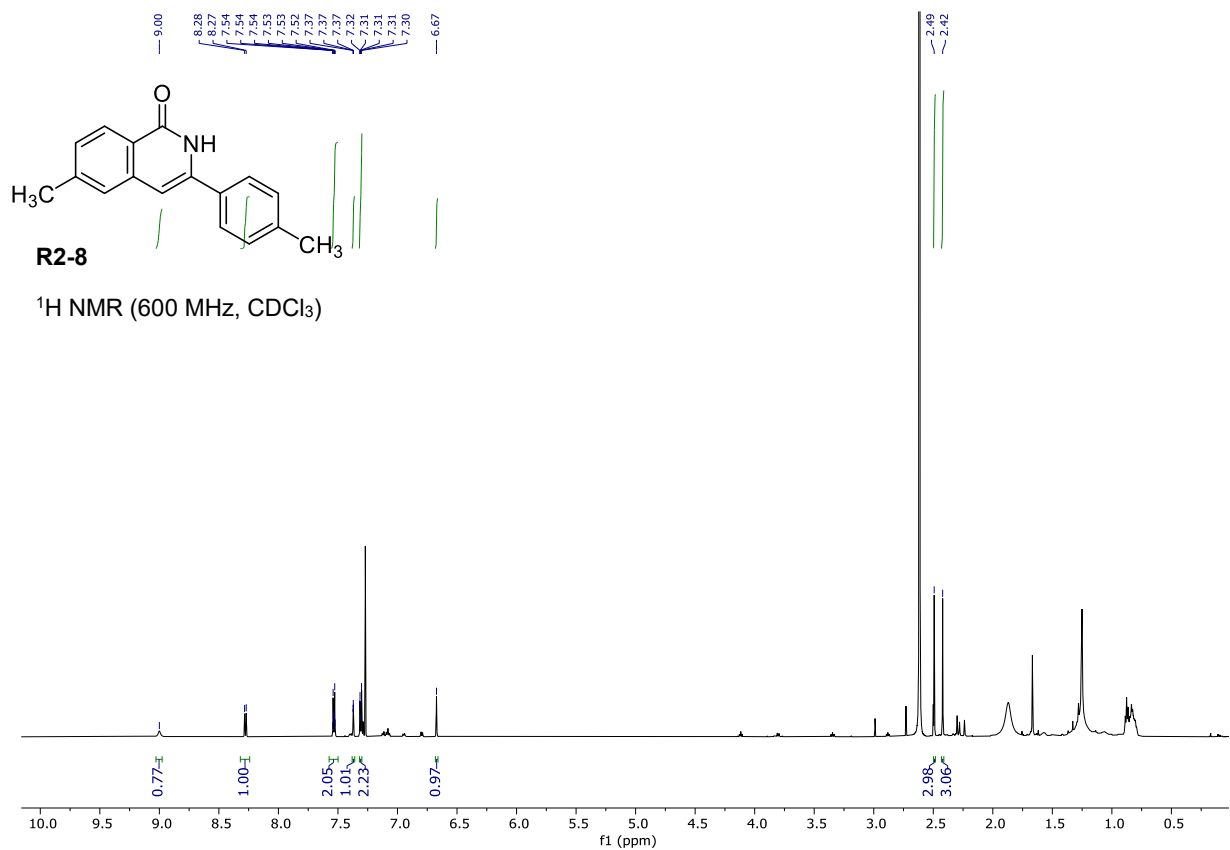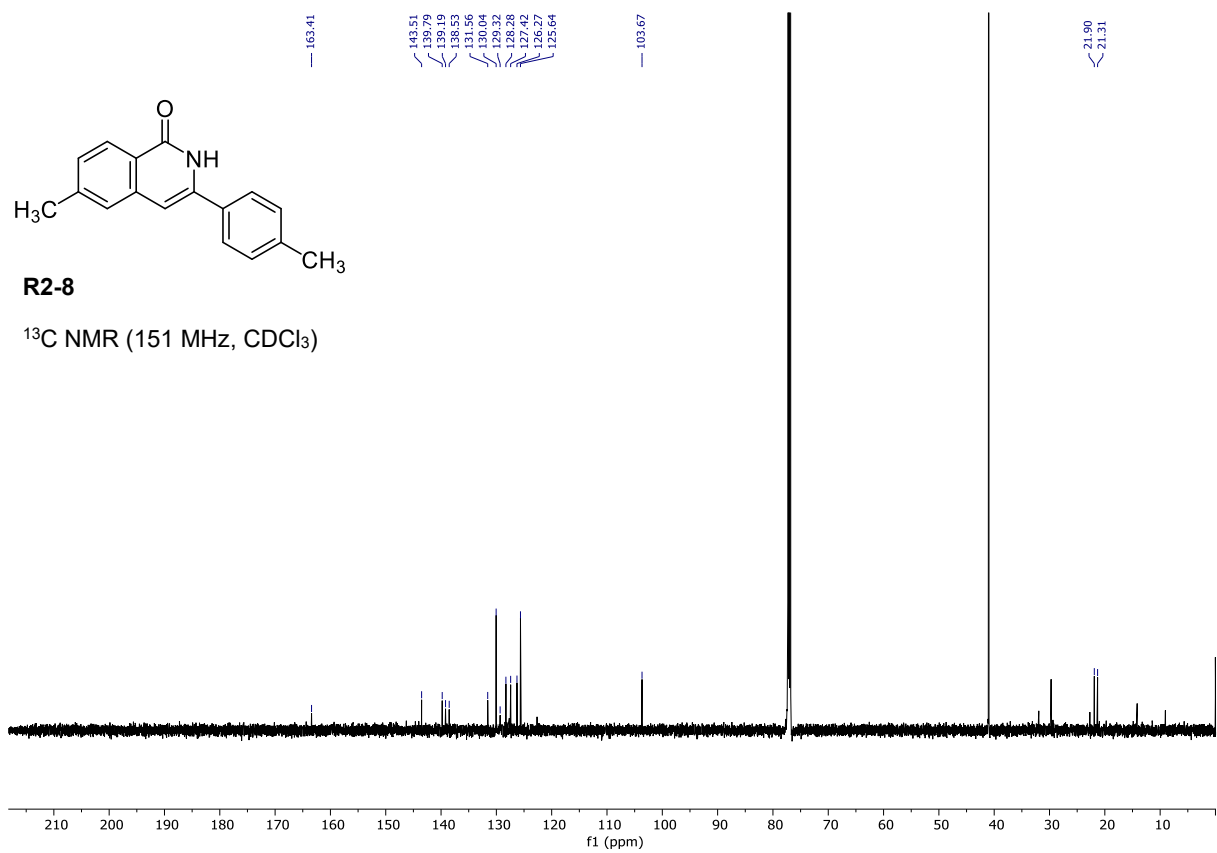

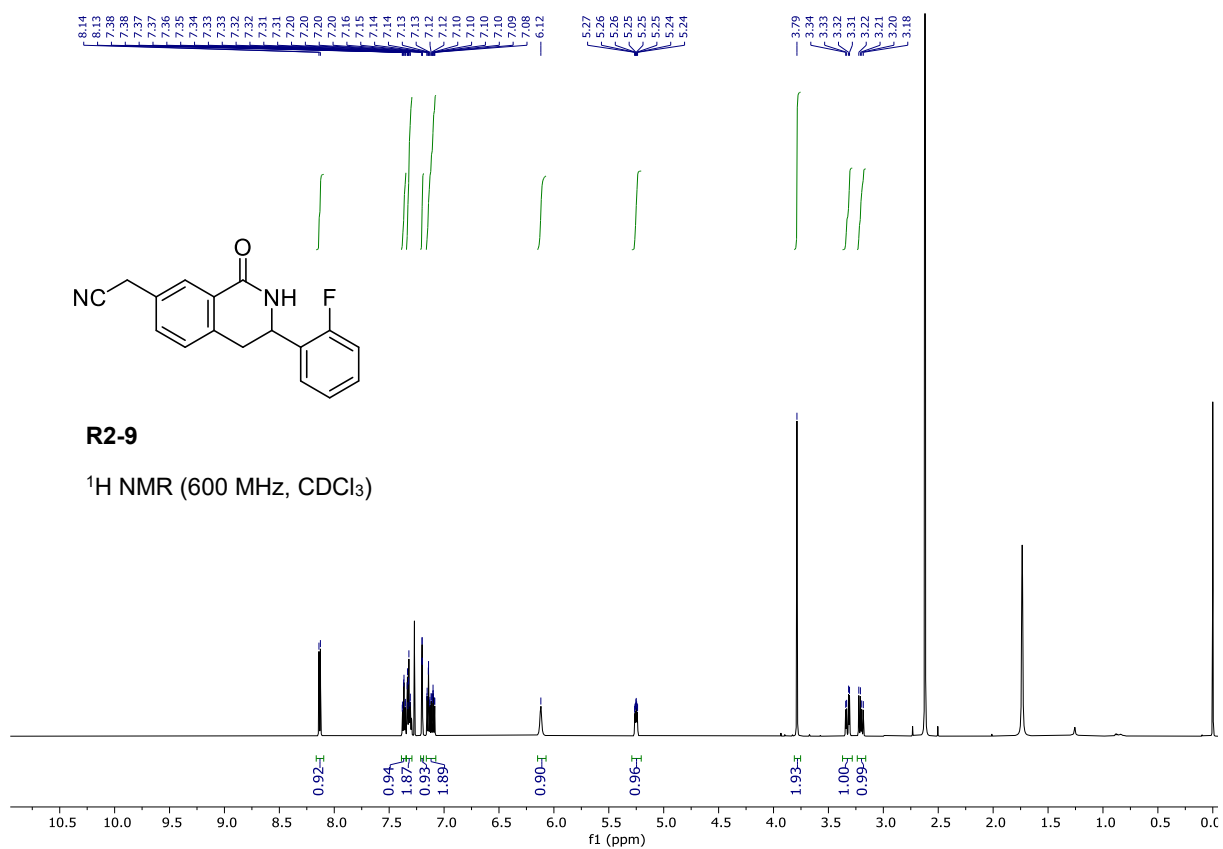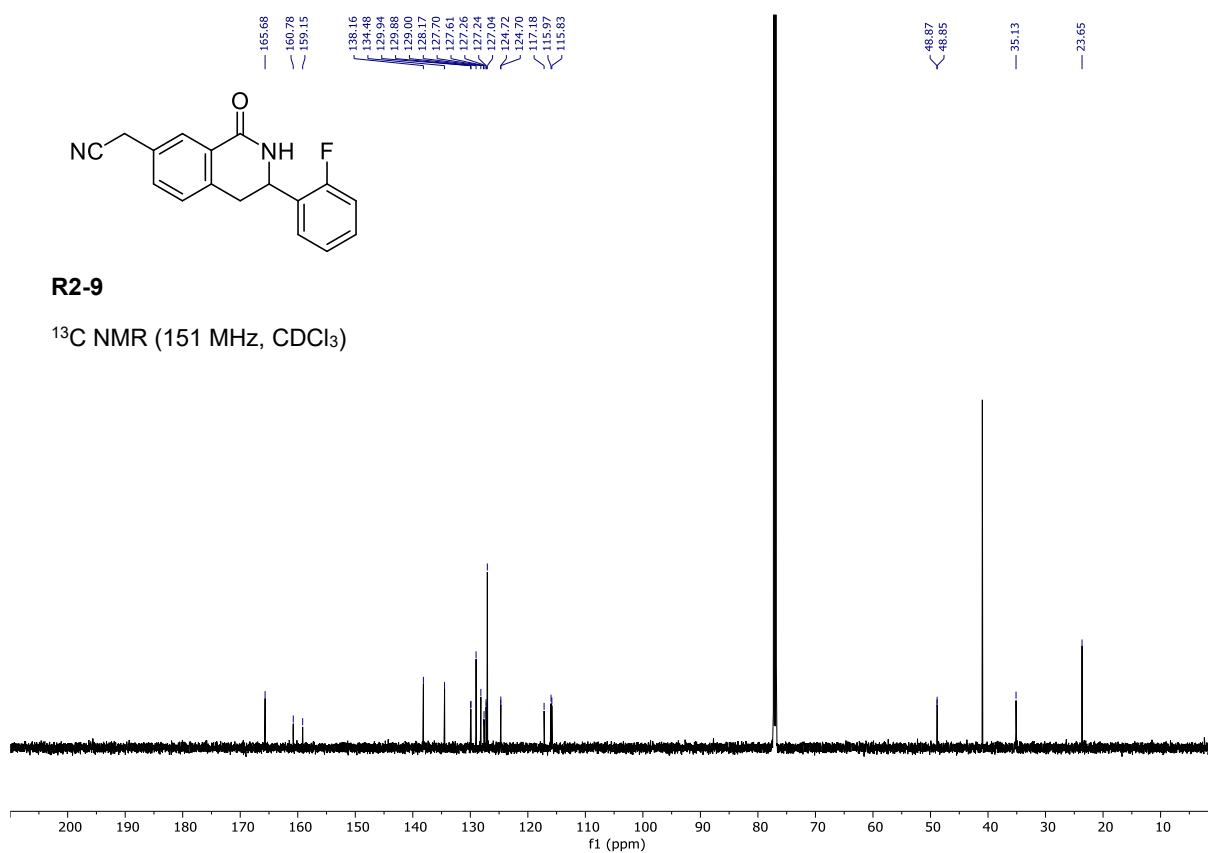

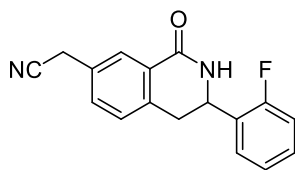

**R2-9**

$^{19}\text{F}$  NMR (376 MHz,  $\text{CDCl}_3$ )

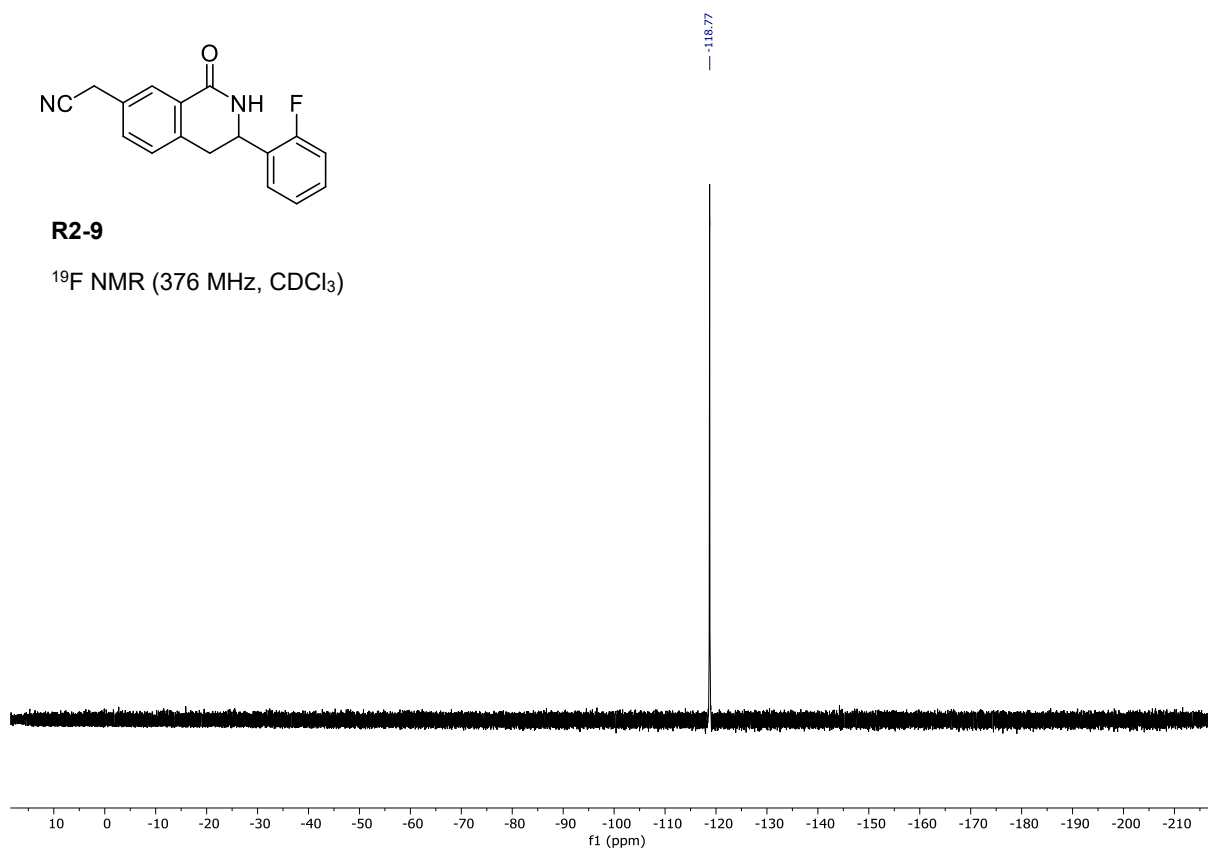

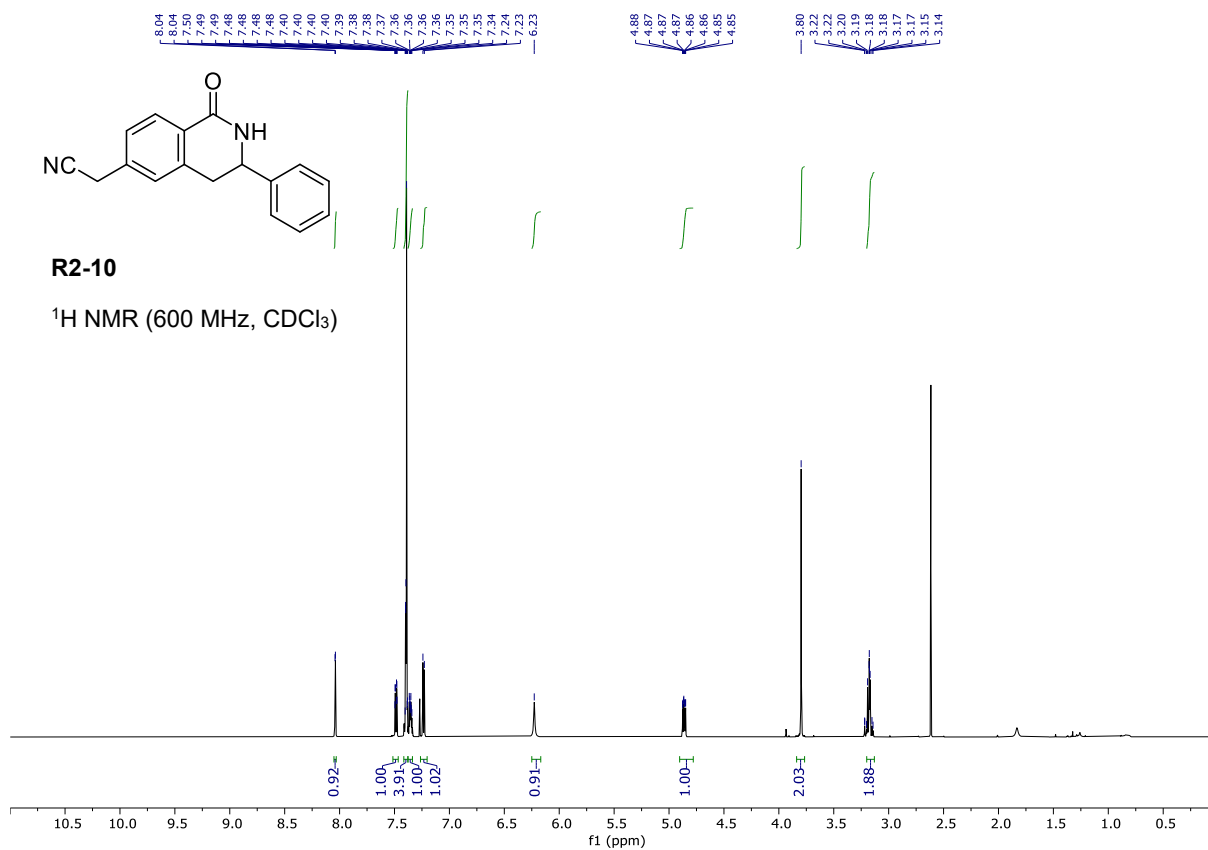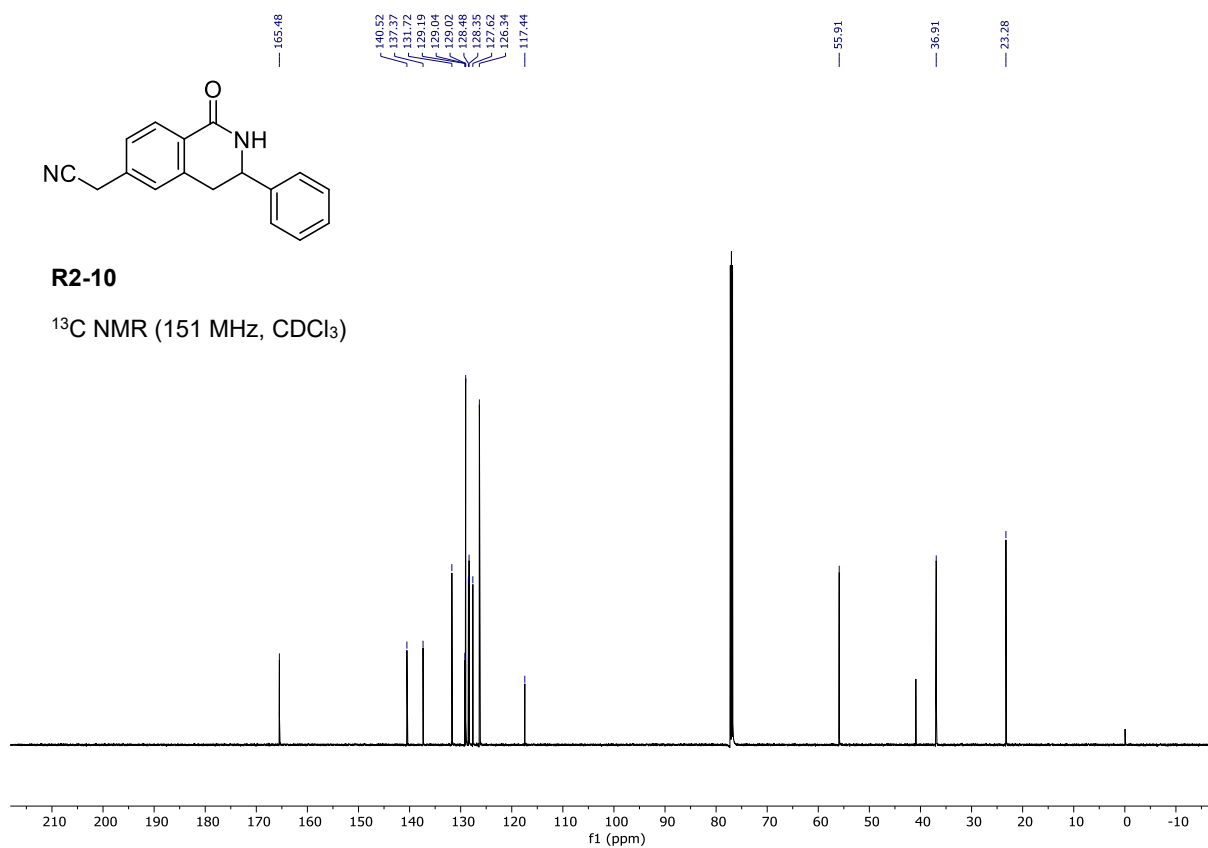

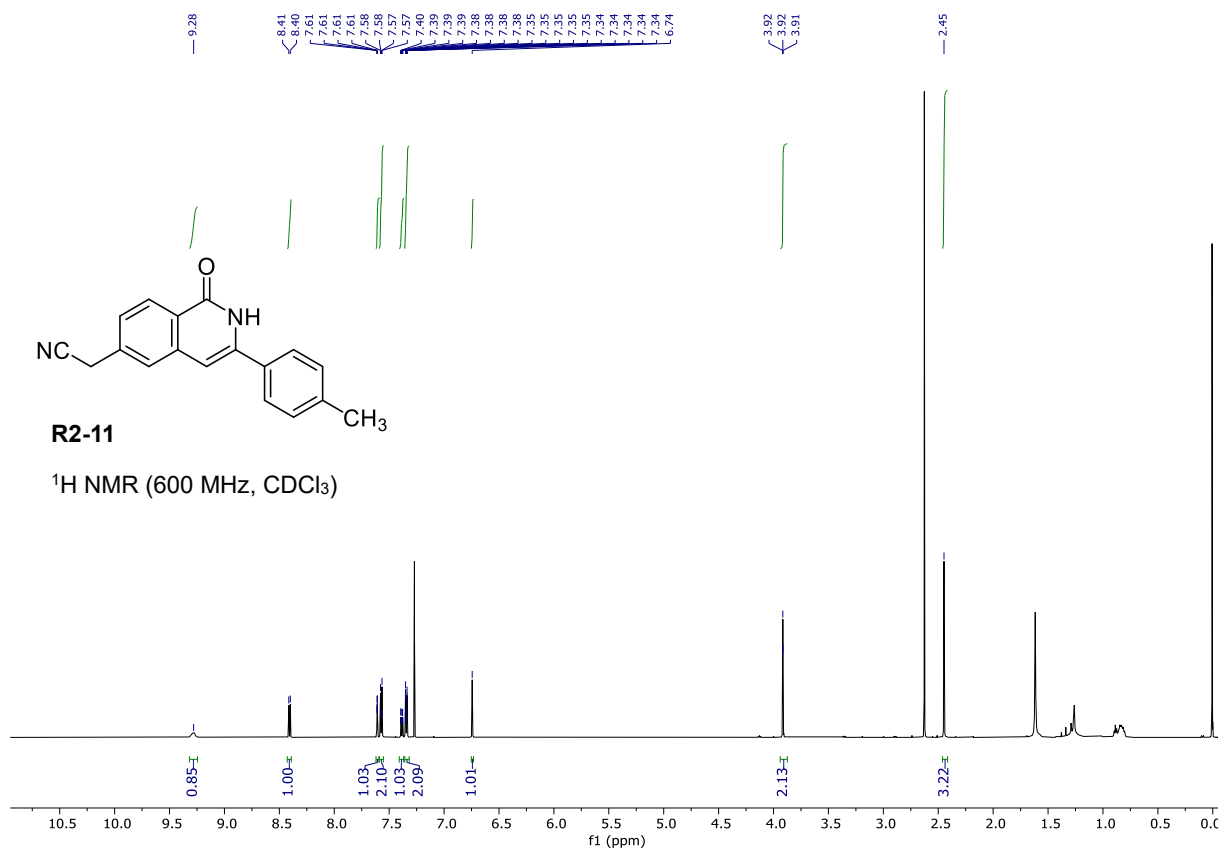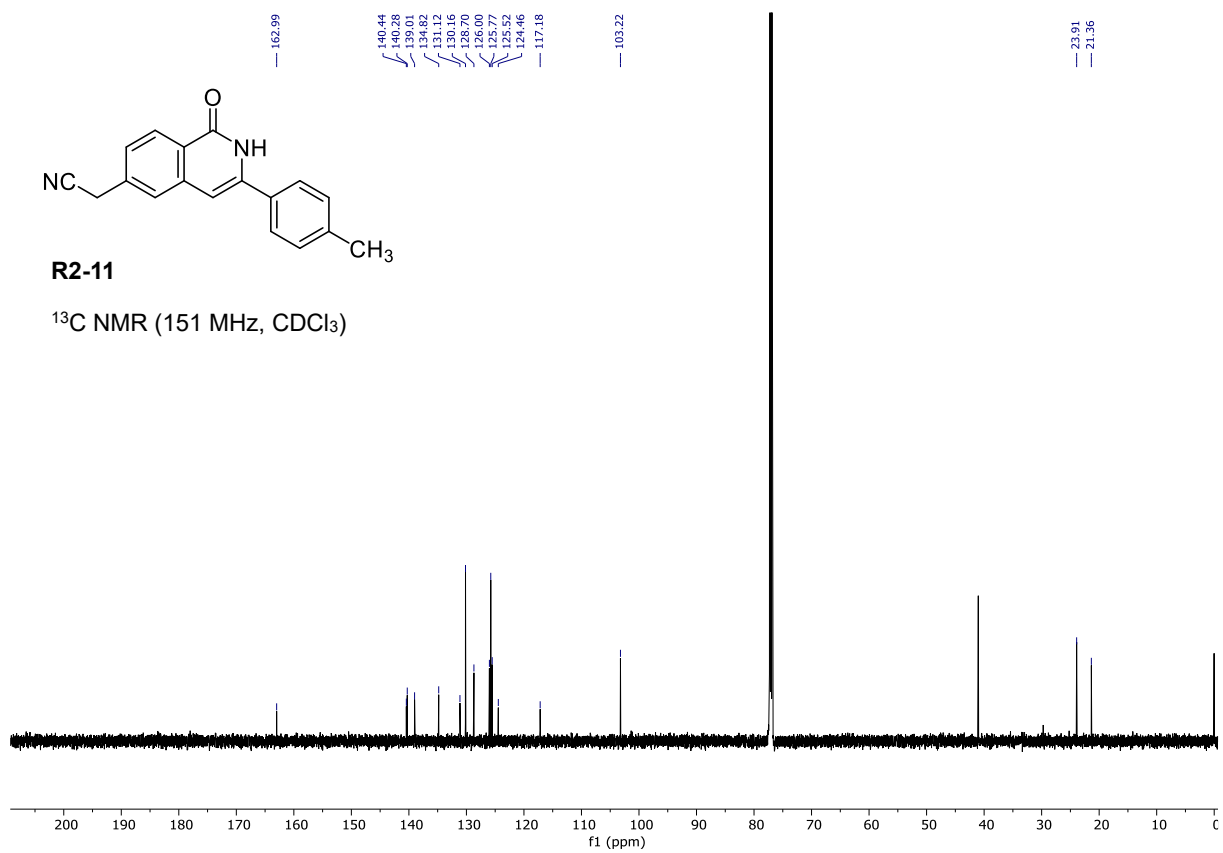

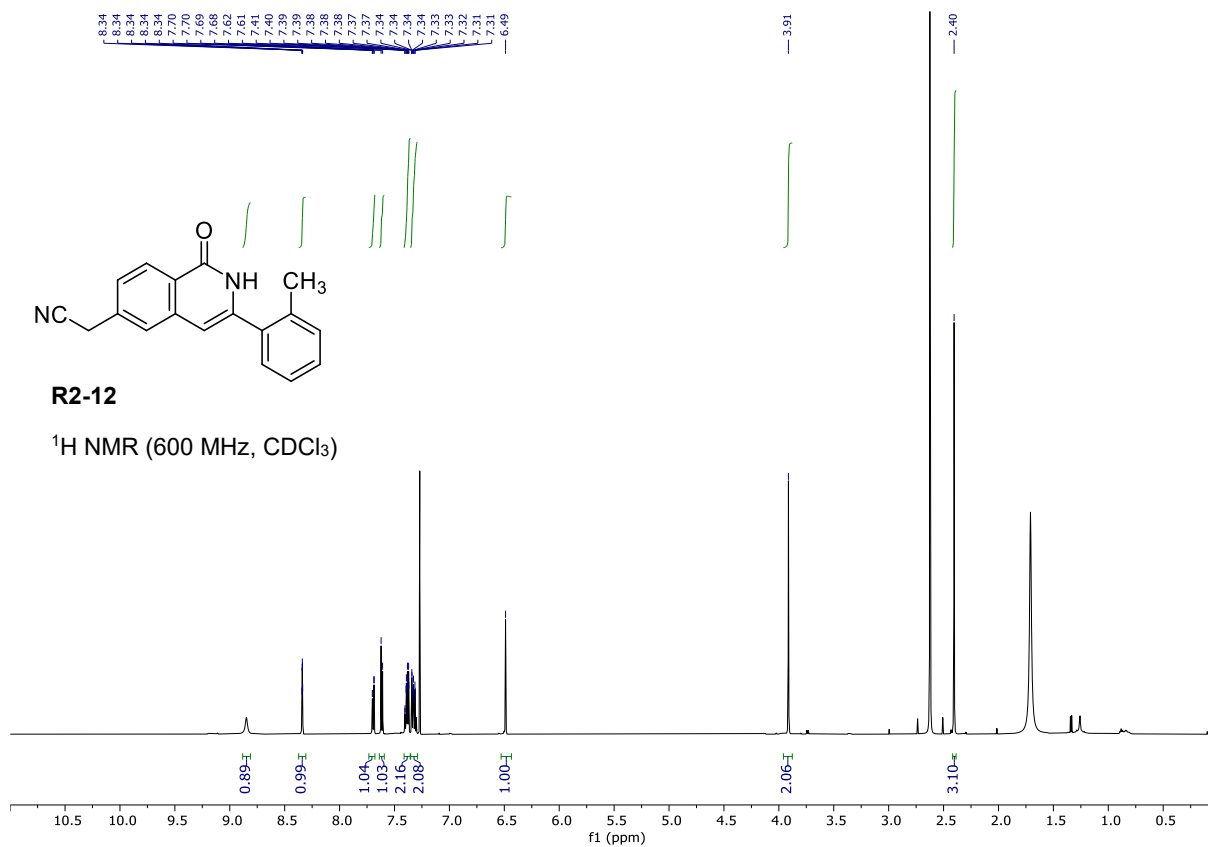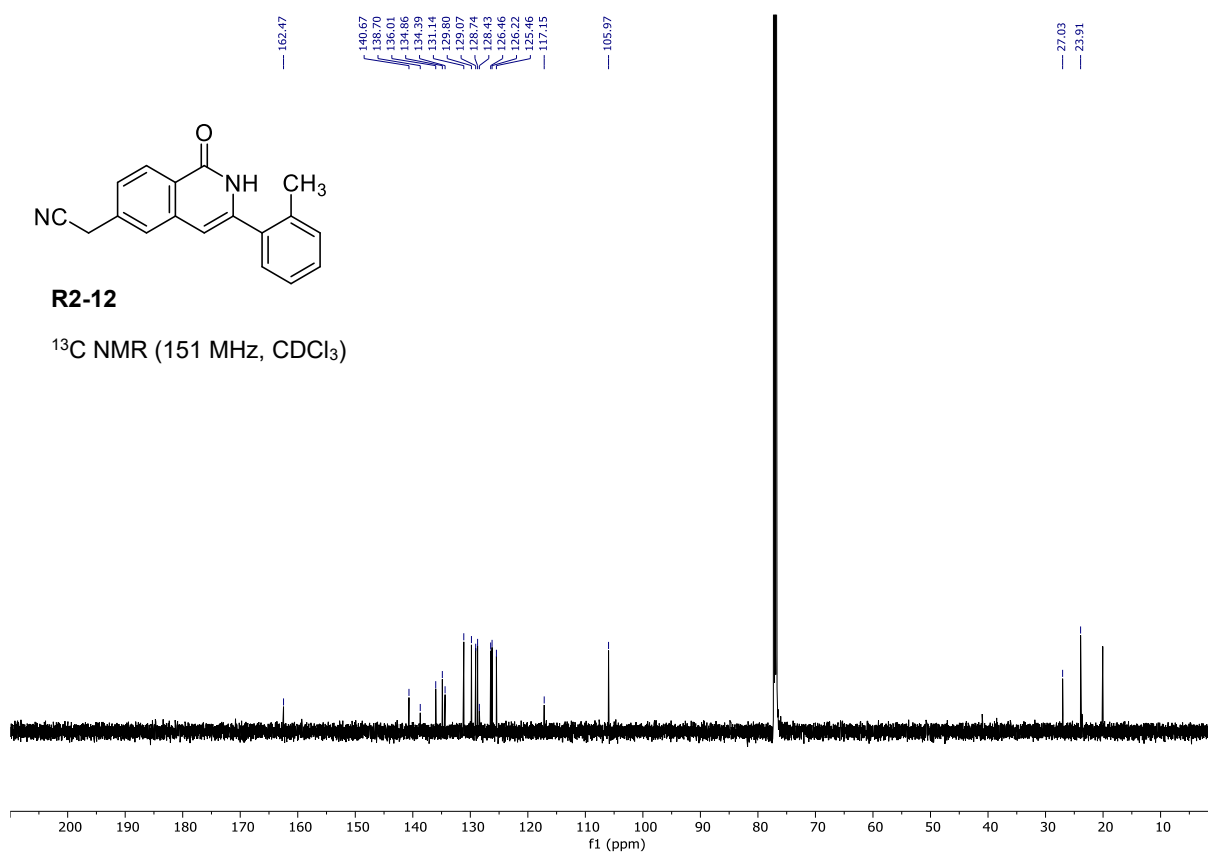

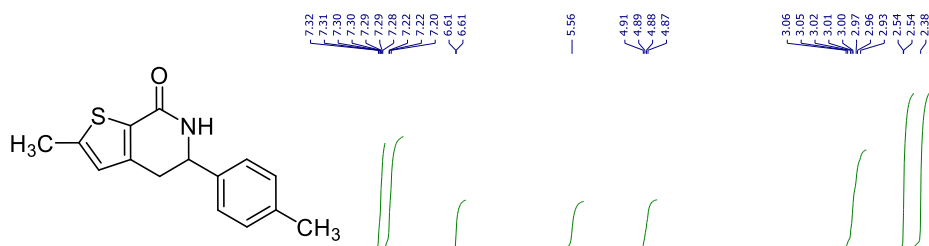

**R2-14**

<sup>1</sup>H NMR (600 MHz, CDCl<sub>3</sub>)

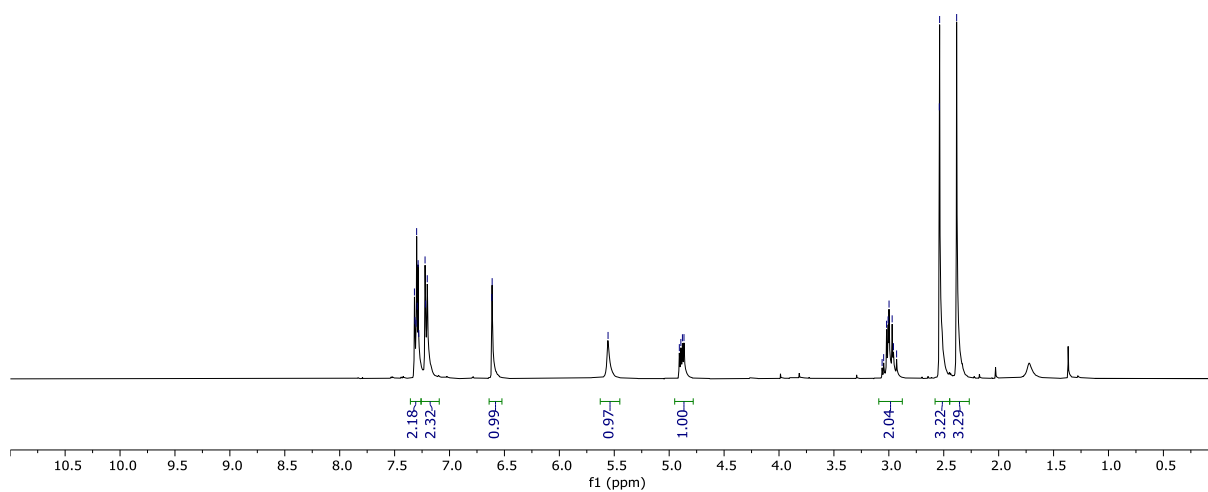

**R2-14**

<sup>13</sup>C NMR (600 MHz, CDCl<sub>3</sub>)

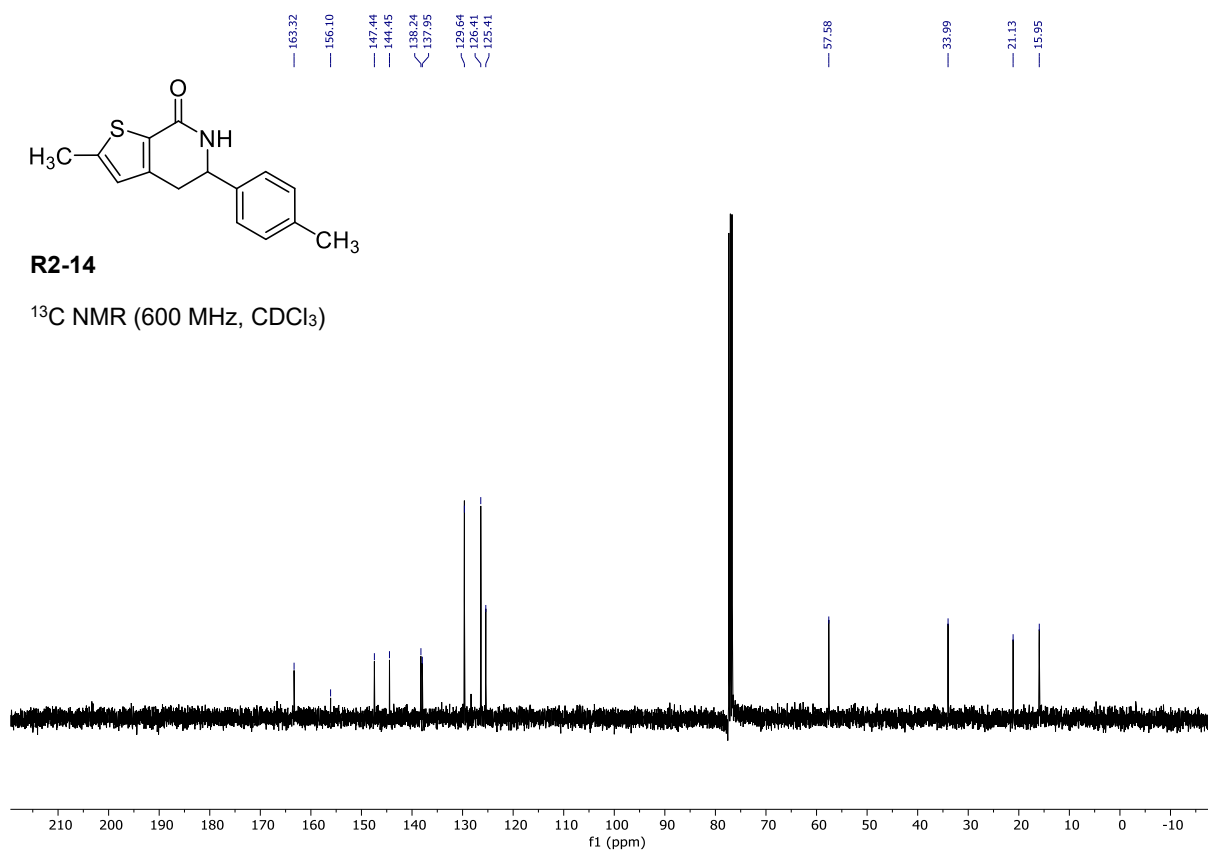

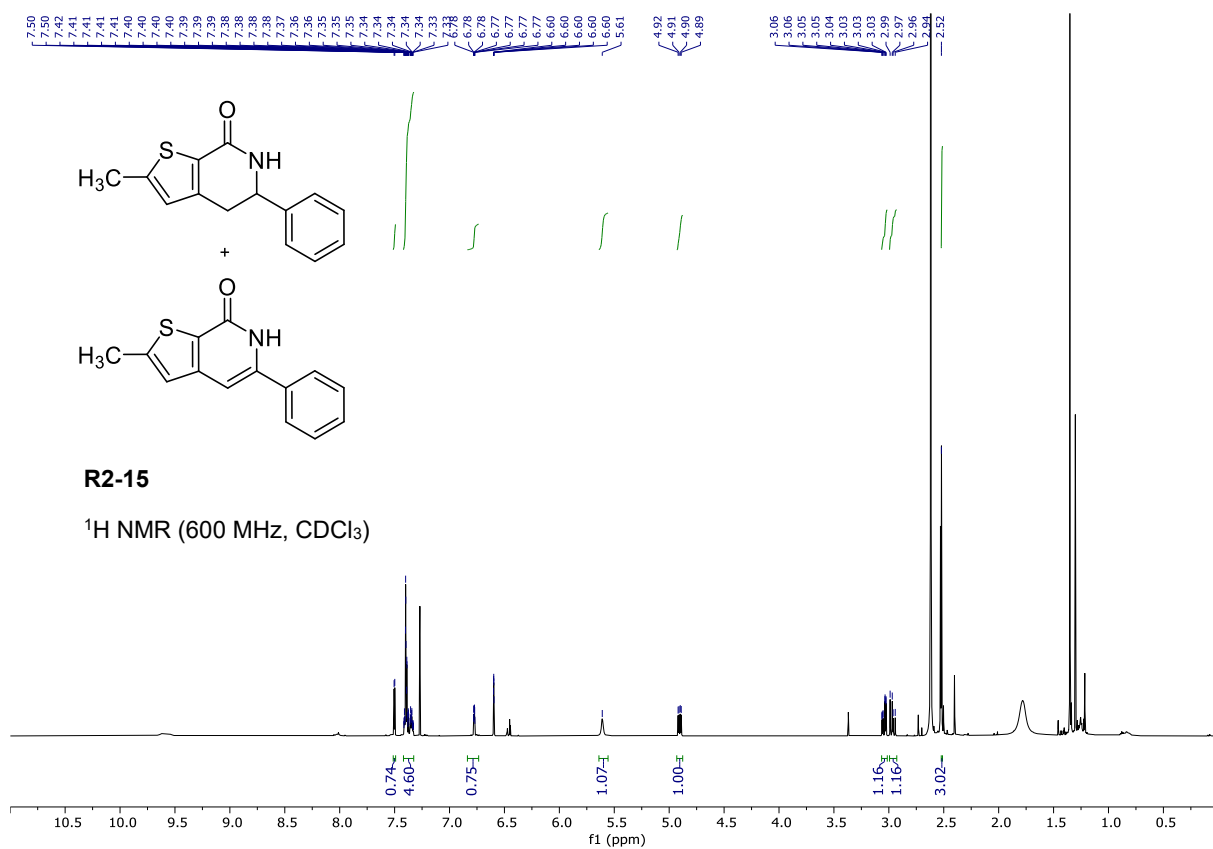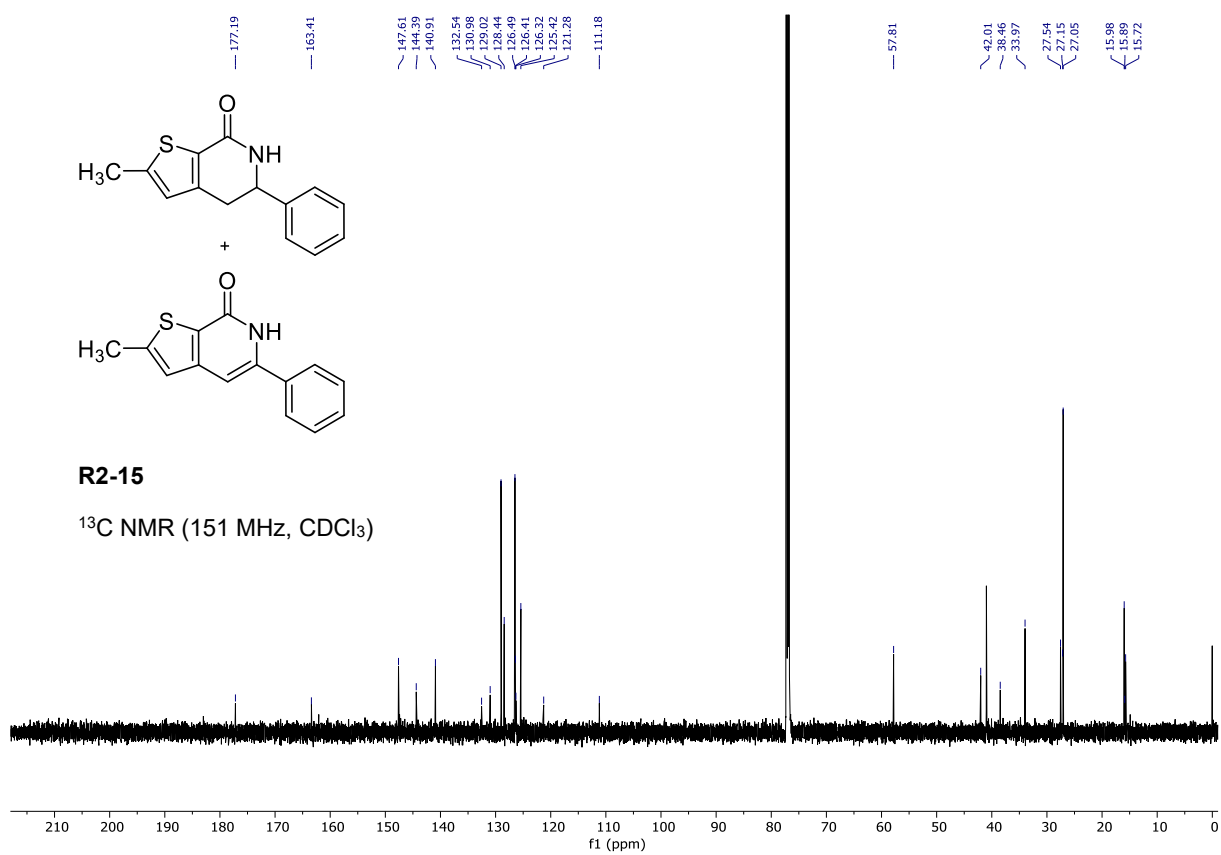



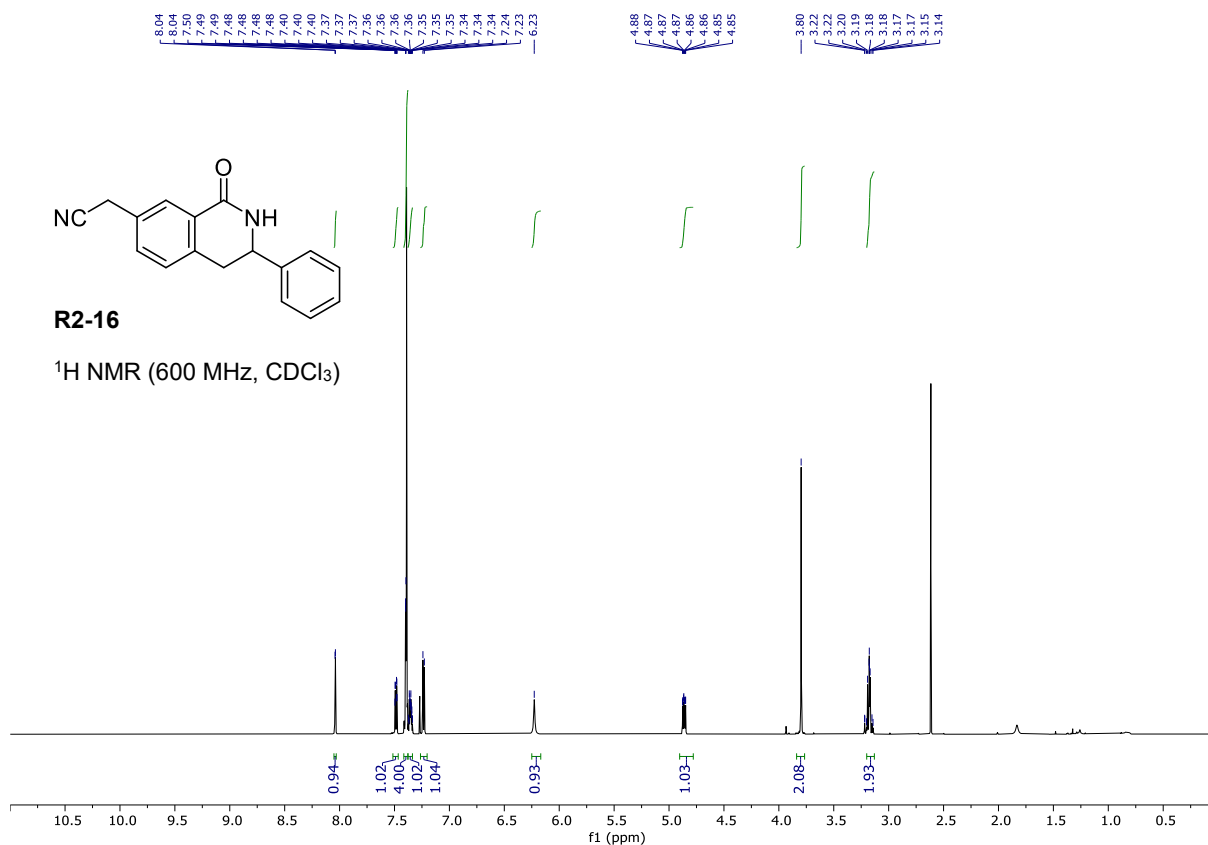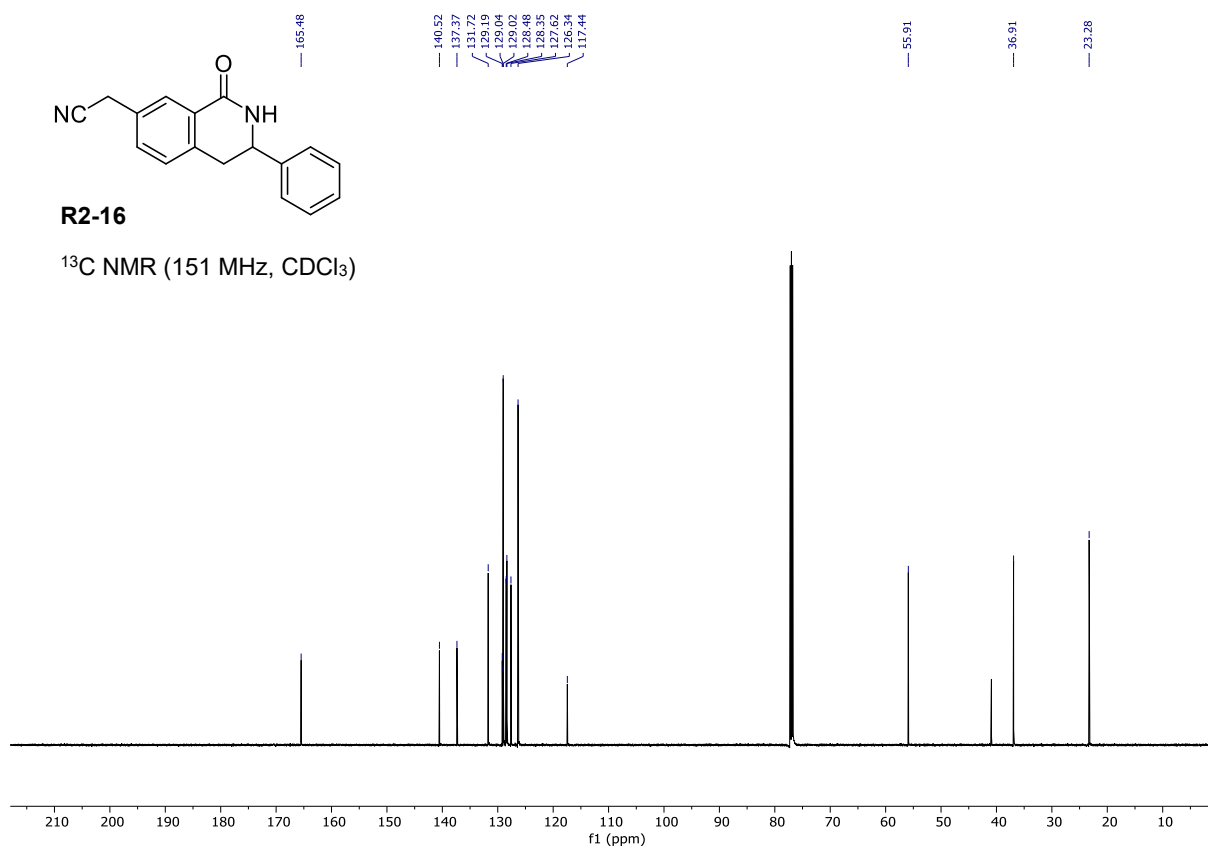

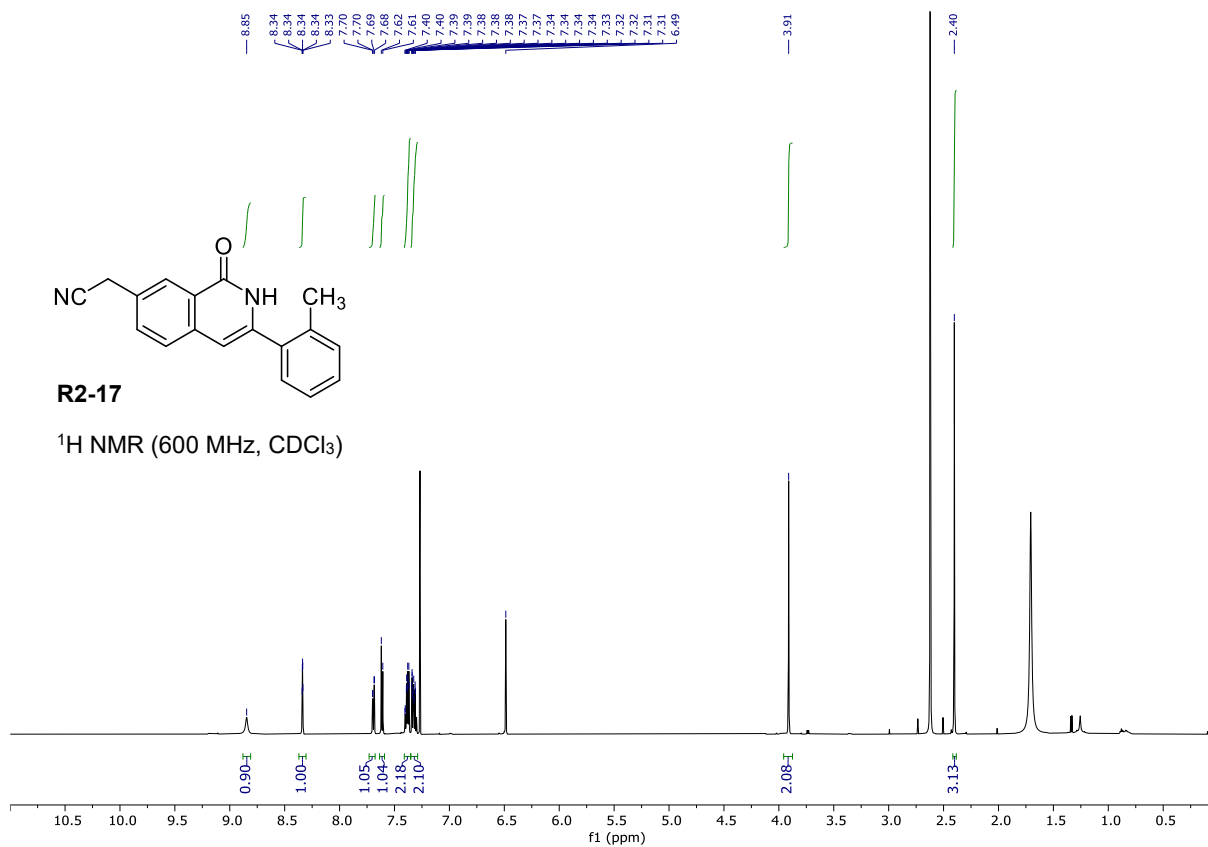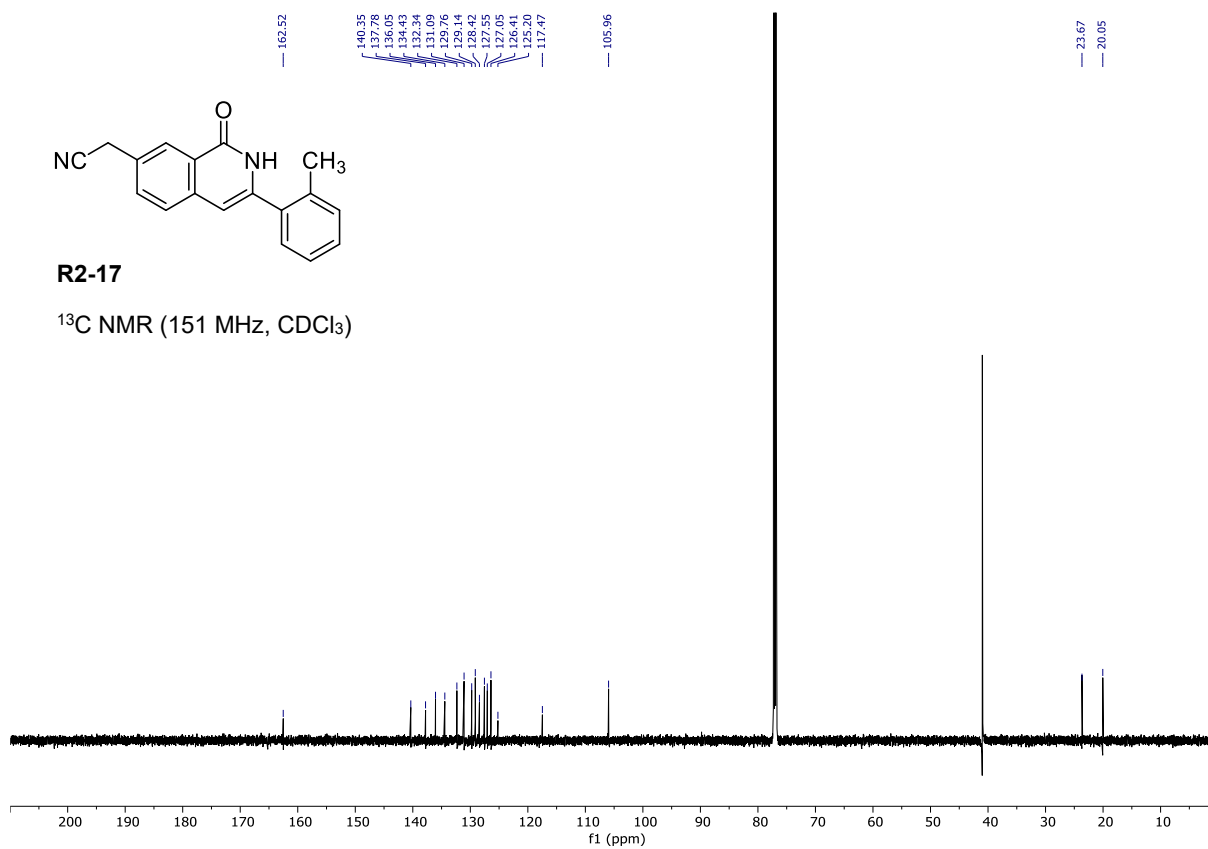

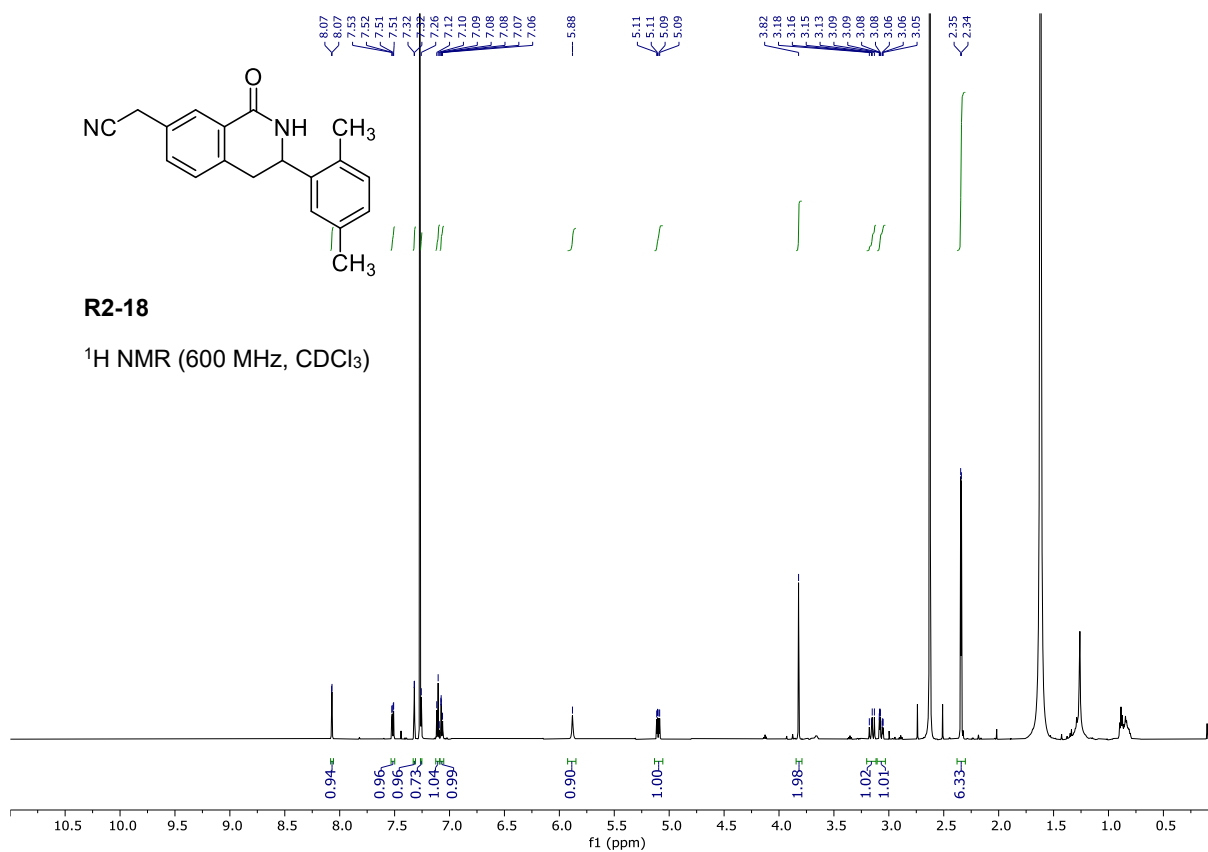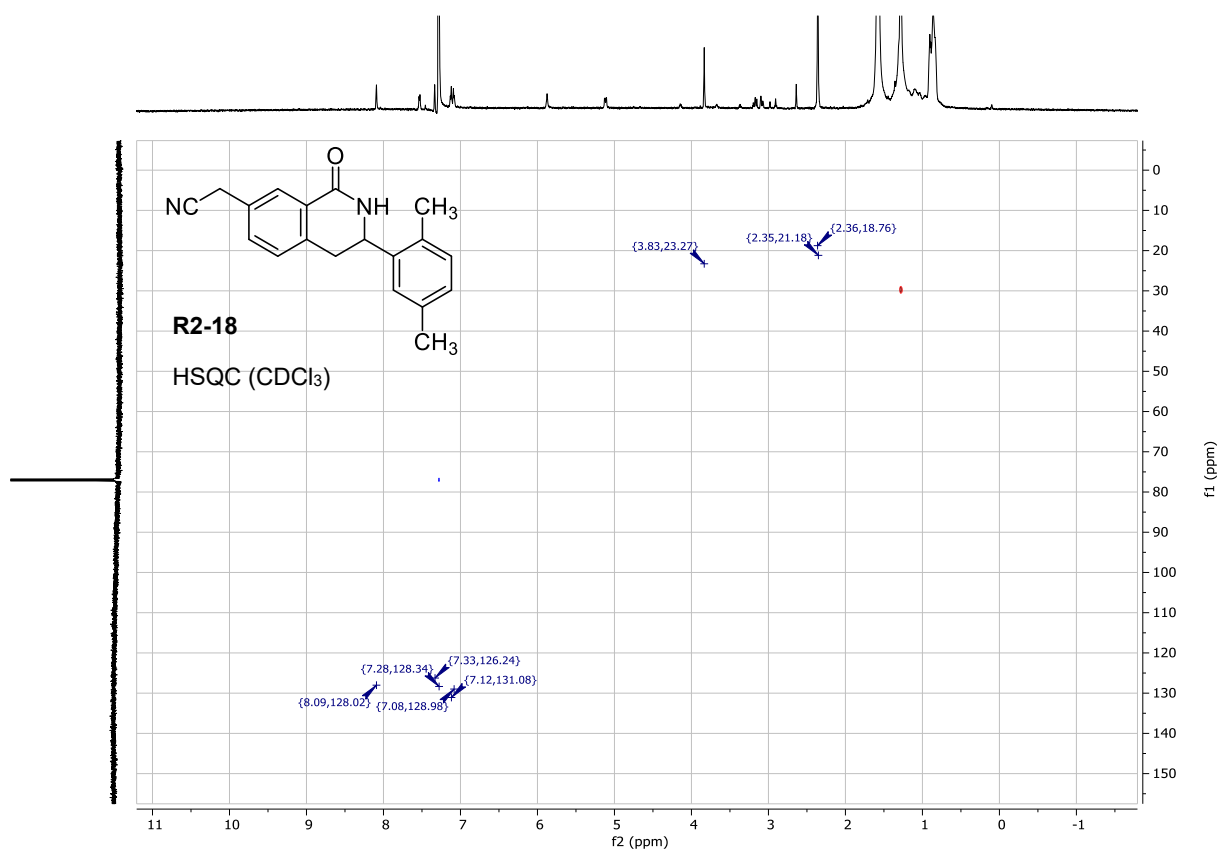

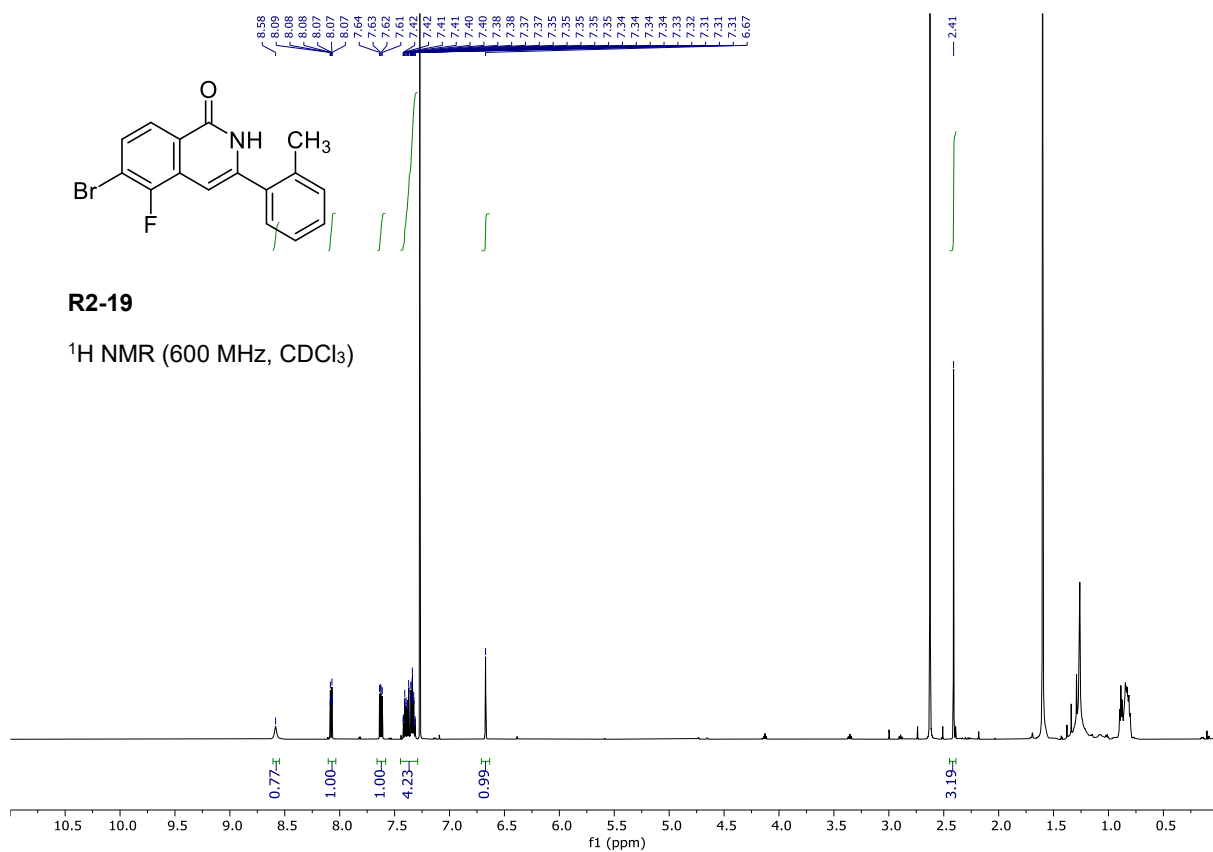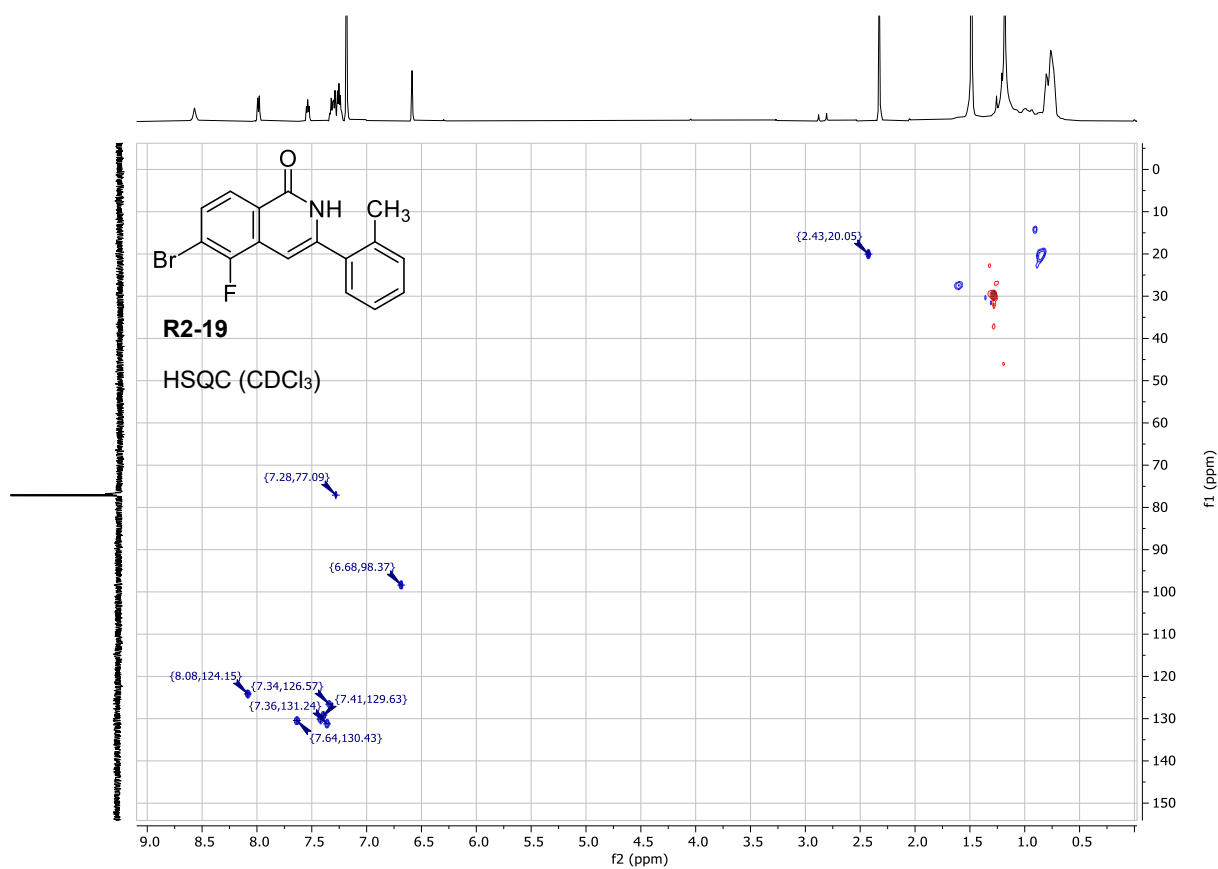

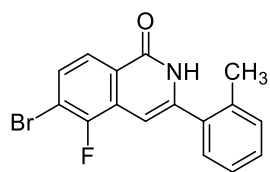

**R2-19**

$^{19}\text{F}$  NMR (376 MHz,  $\text{CDCl}_3$ )

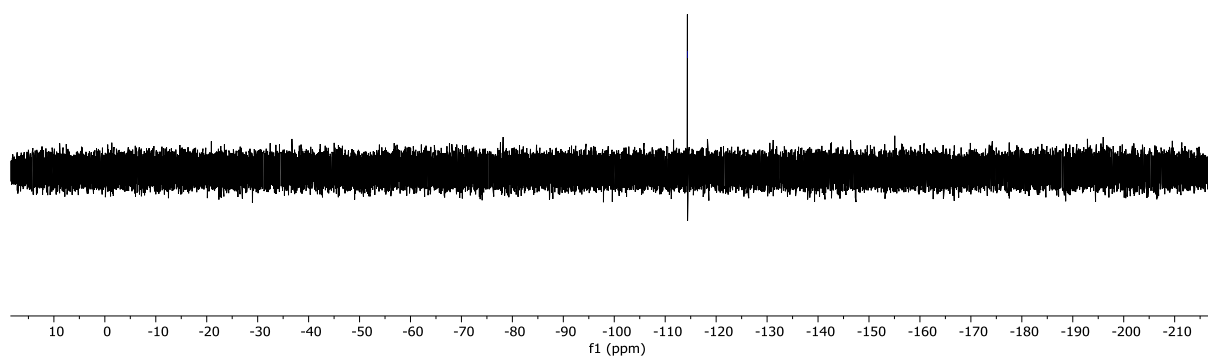

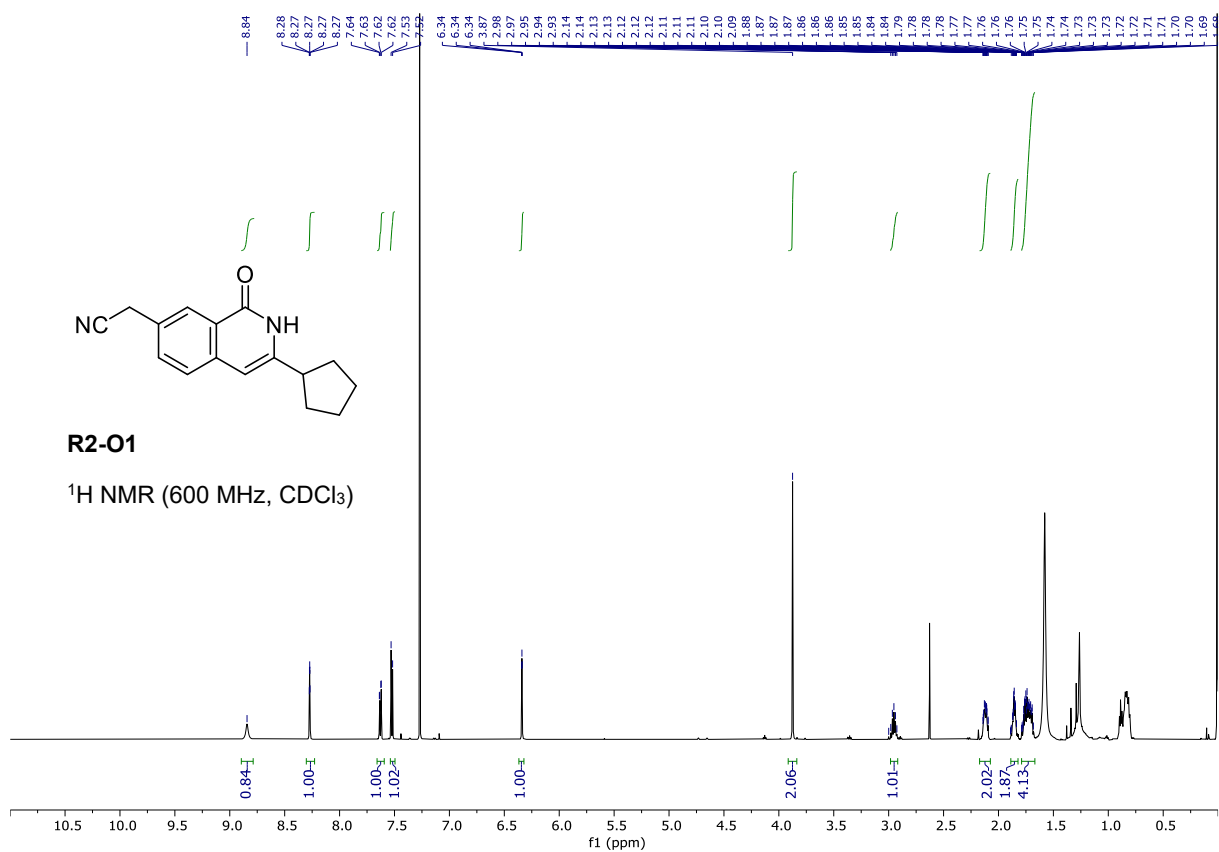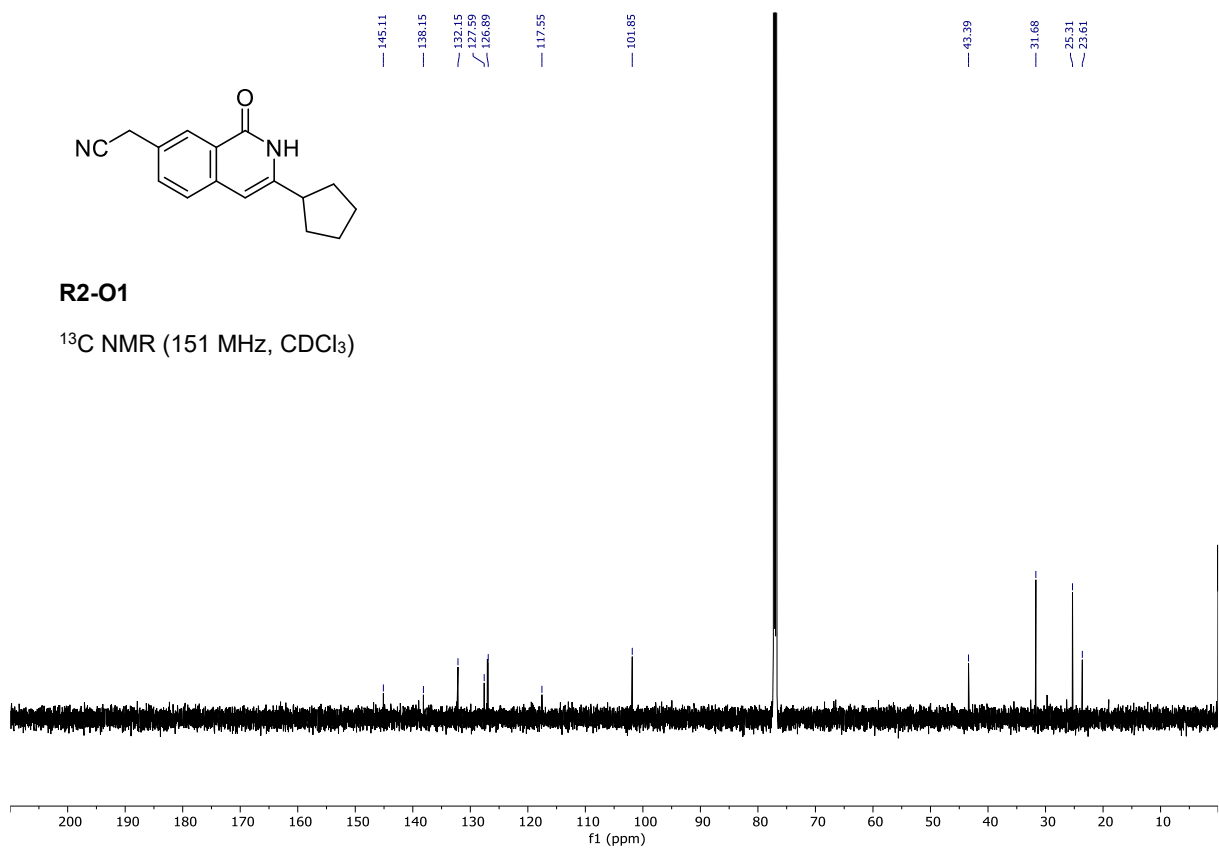

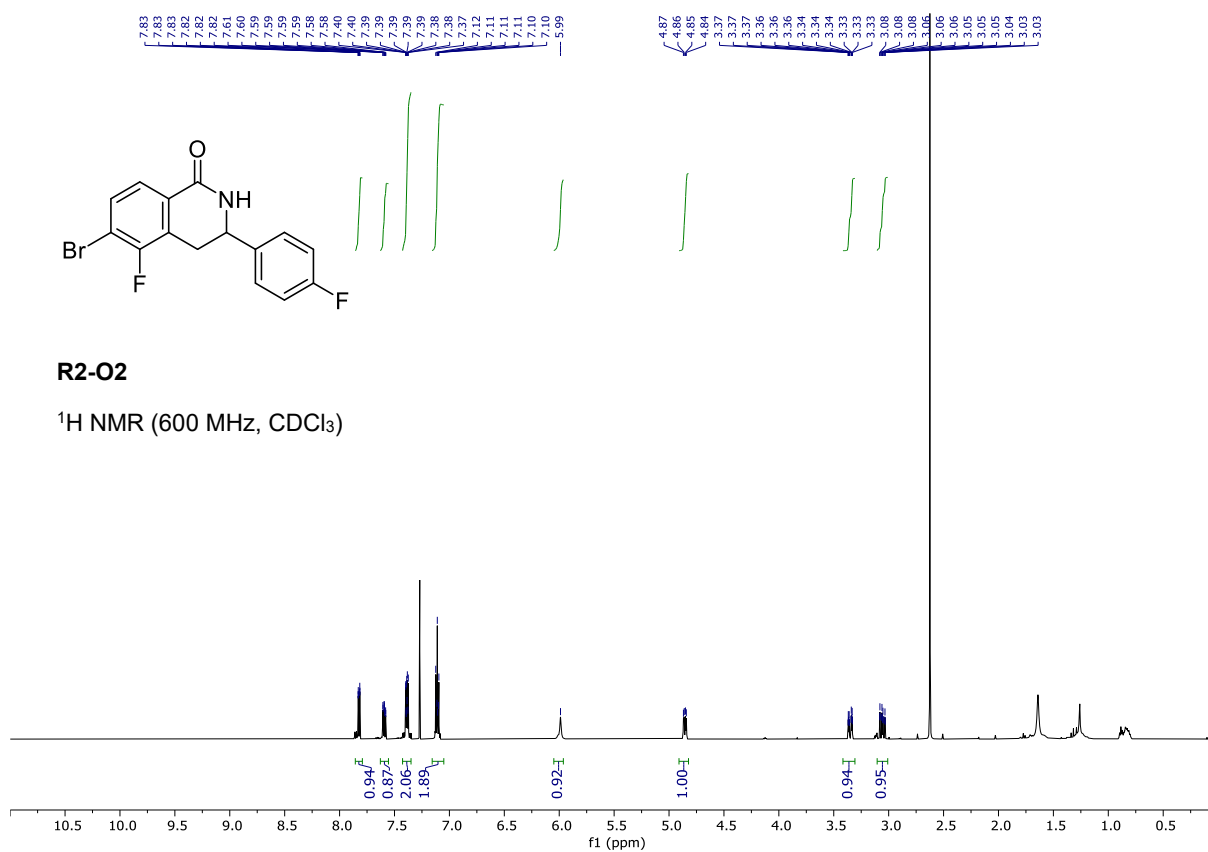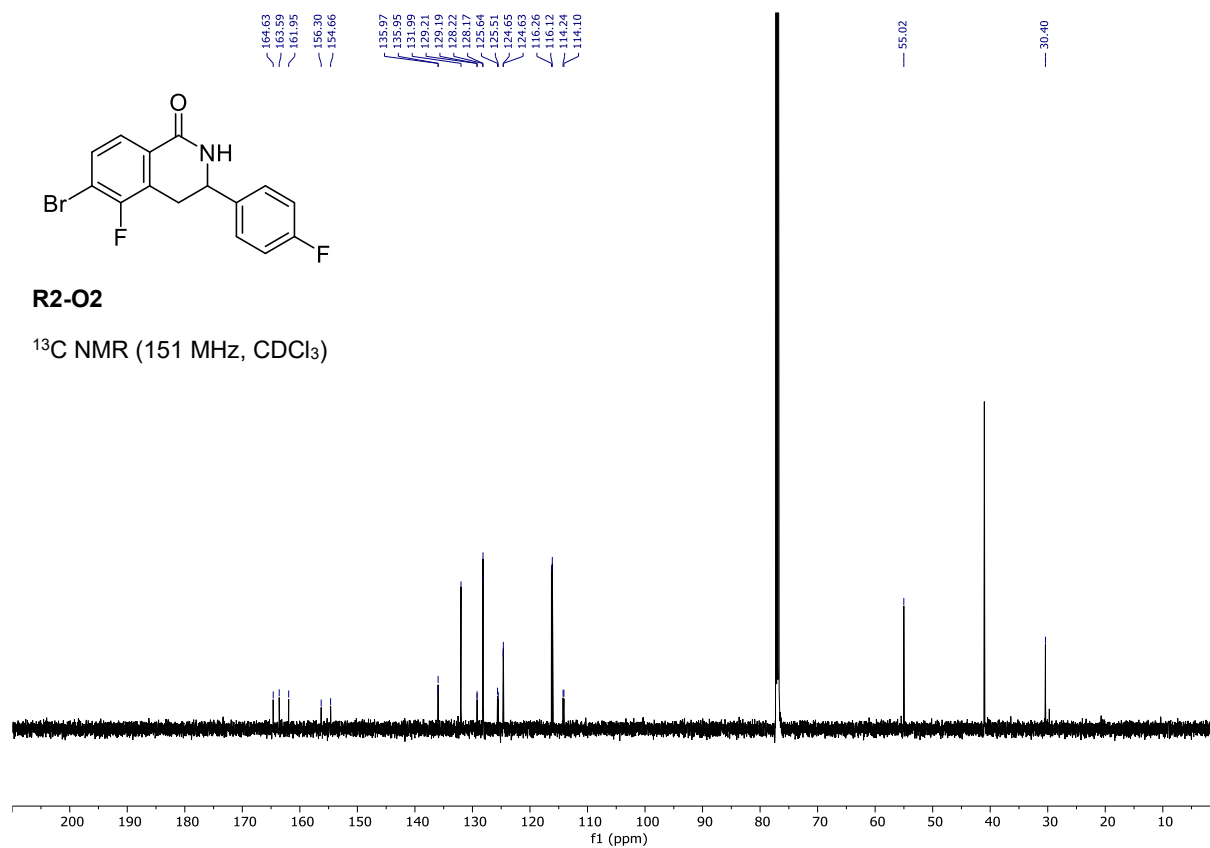

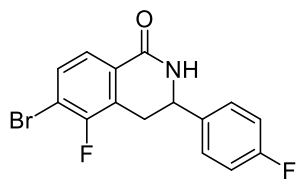

**R2-O2**

$^{19}\text{F}$  NMR (376 MHz,  $\text{CDCl}_3$ )

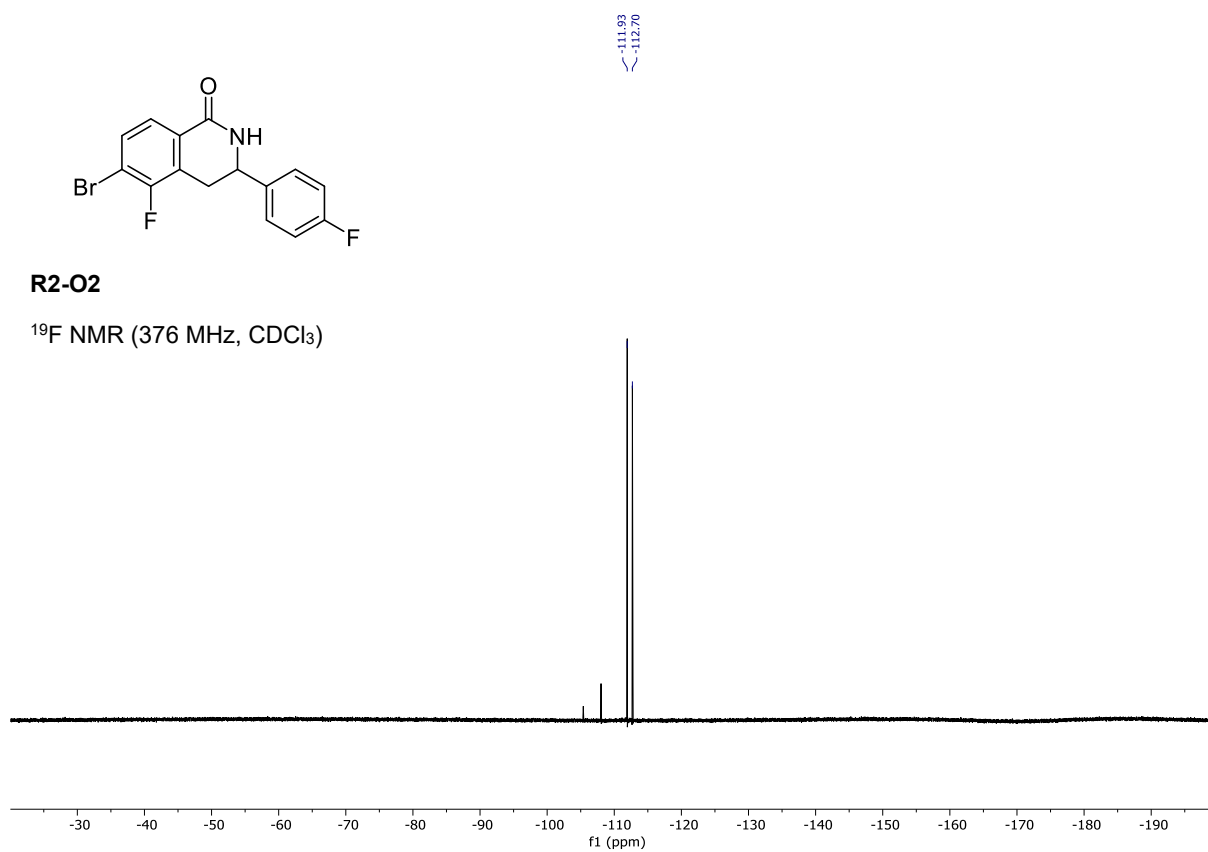

Supplement: Supplementary file 1 [file 9615766de08a54a13ffe722f.pdf]
